# Supplementary material for: Identification of a Novel Prognostic Gene Signature From the Immune Cell Infiltration Landscape of Osteosarcoma
Source: PubMed Central journal article supplement (PMC8450587; doi:10.3389/fcell.2021.718624), 2021-09-06
Supplement: Data_Sheet_1.pdf [file Data_Sheet_1.pdf]

Figure S1

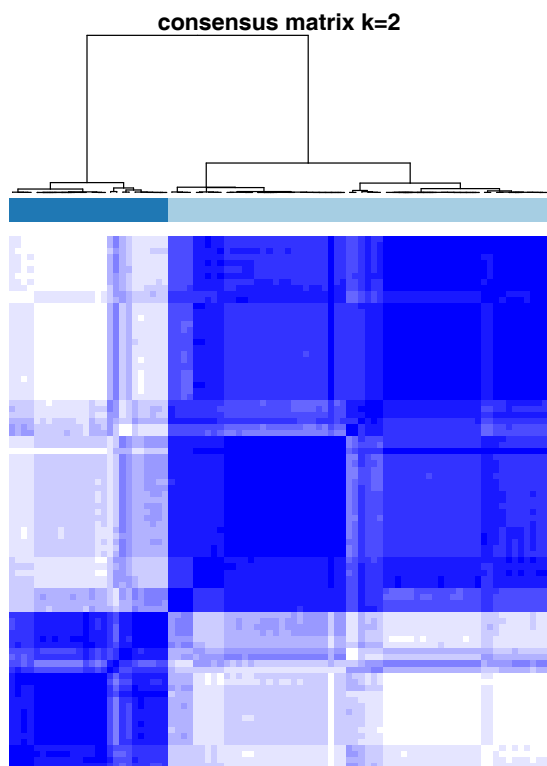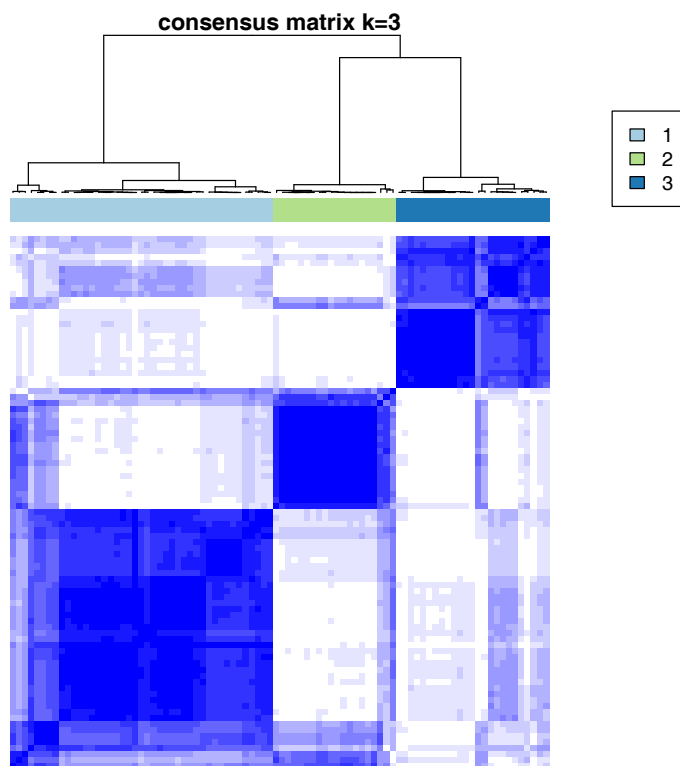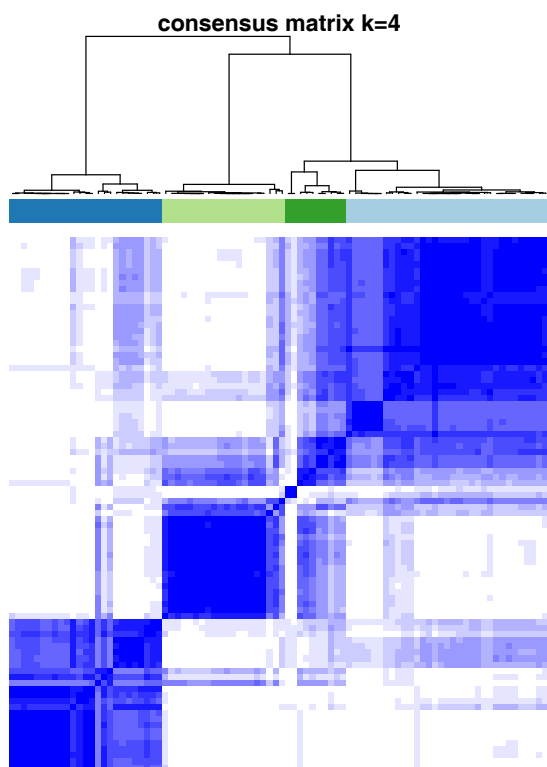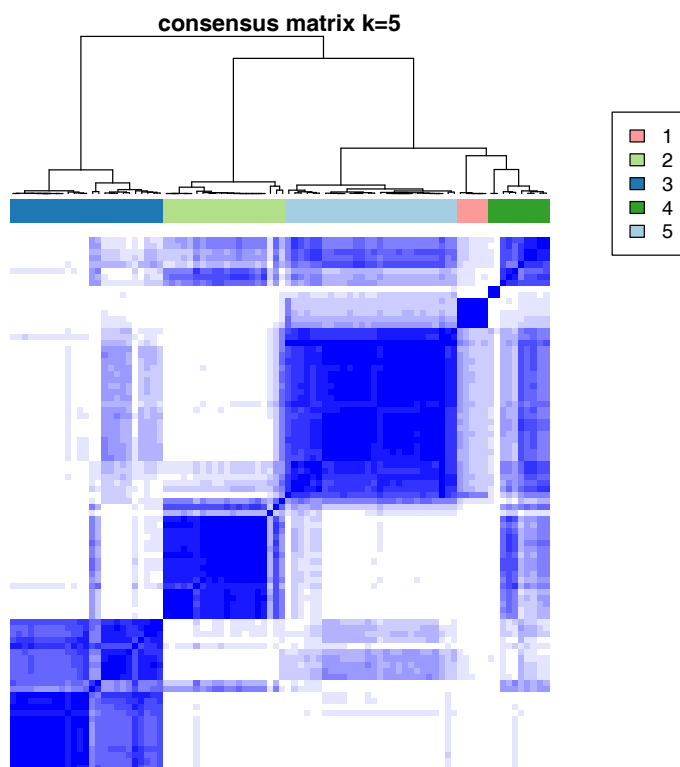

Figure S2

A

TARGET-OS  
(overall survival)

Level + High + Low

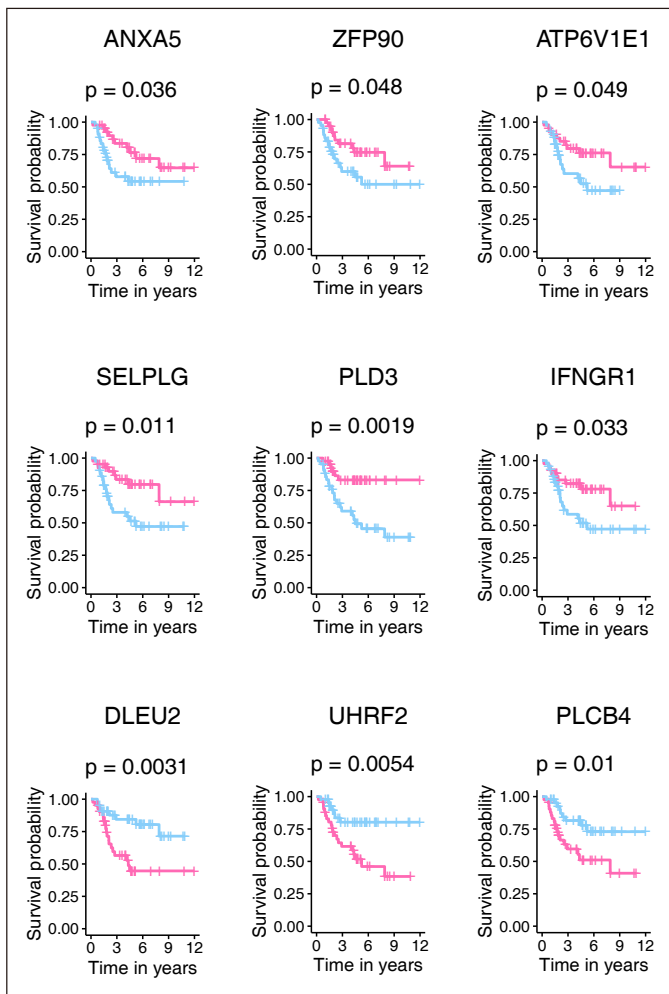

B

GSE21257  
(overall survival)

Level + High + Low

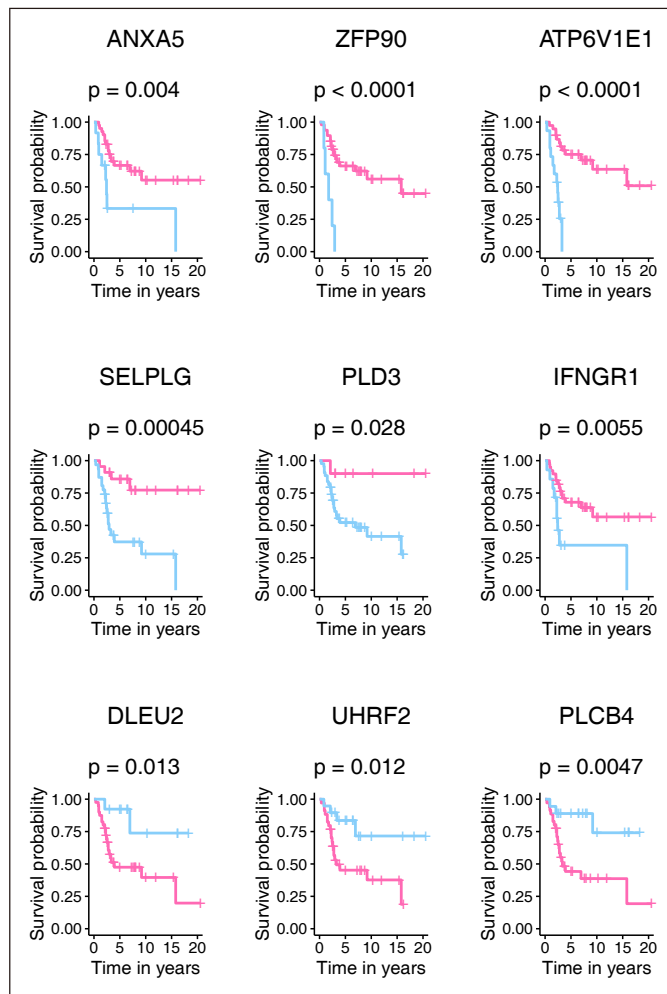

# Figure S3

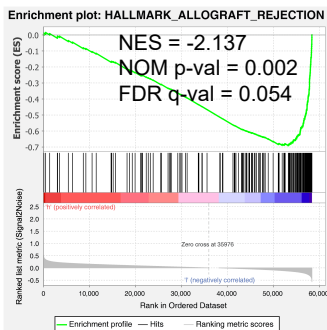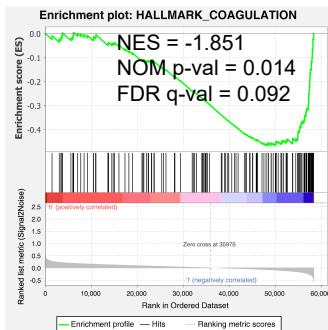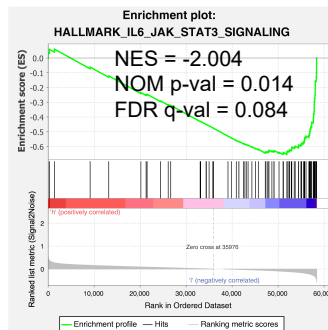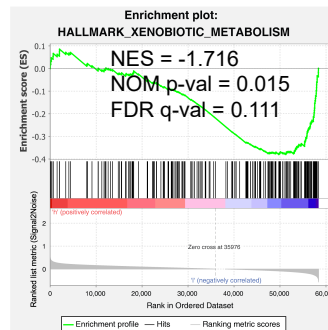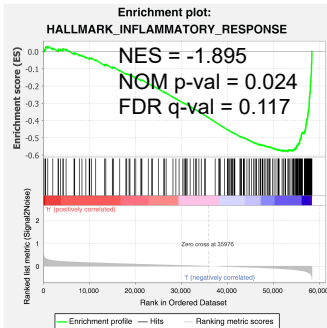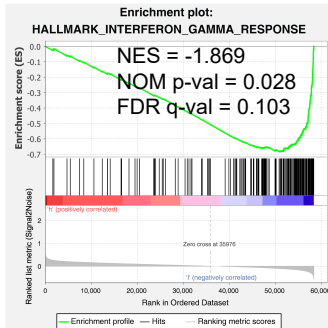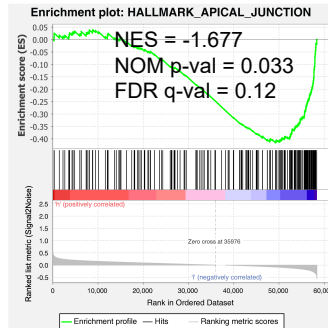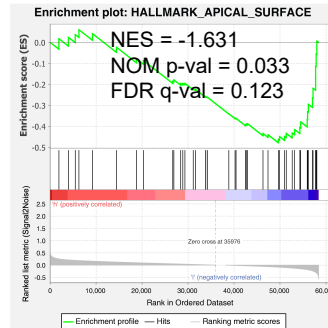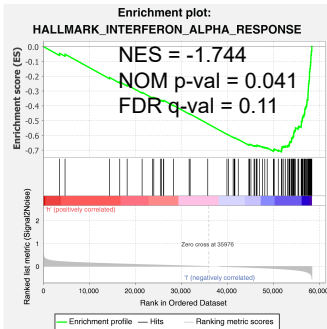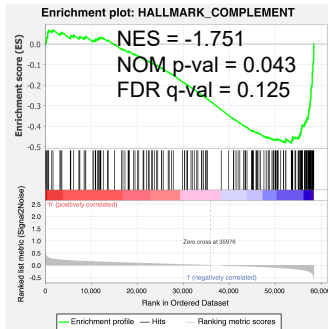



**Table S1. Differentially expressed genes identified between two ICI clusters (p-value < 0.05 and log2|fold-change| > 0.2).**

| <b>Gene</b>   | <b>log2 fold-change </b> | <b>average expression</b> | <b>t</b>     | <b>p-value</b> | <b>B</b>    |
|---------------|--------------------------|---------------------------|--------------|----------------|-------------|
| DEF6          | -0.832532215             | 1.570073862               | -5.552095367 | 3.00E-07       | 6.17410153  |
| TREM2         | -1.276480581             | 2.984409267               | -5.360262238 | 6.70E-07       | 5.476771489 |
| PARVG         | -0.631259042             | 1.104859034               | -5.296207605 | 8.74E-07       | 5.246346276 |
| C1orf162      | -1.019613761             | 1.935017129               | -5.239133296 | 1.11E-06       | 5.042101765 |
| C1QA          | -1.679834253             | 5.711790772               | -5.015058237 | 2.76E-06       | 4.250497029 |
| VSIG4         | -1.503696198             | 2.715814852               | -5.012817417 | 2.78E-06       | 4.242666776 |
| LY86          | -0.945329637             | 1.930266703               | -4.988643029 | 3.07E-06       | 4.158304744 |
| AIF1          | -1.227298786             | 3.514843394               | -4.958995651 | 3.46E-06       | 4.055125959 |
| RNASE1        | -1.252348987             | 6.199248805               | -4.890628279 | 4.55E-06       | 3.81840008  |
| ALOX5AP       | -1.111341593             | 2.367748302               | -4.853018893 | 5.28E-06       | 3.688906094 |
| NCF4          | -0.984042011             | 2.189214787               | -4.796914899 | 6.59E-06       | 3.496717484 |
| SASH3         | -0.877573895             | 1.759515069               | -4.773282569 | 7.23E-06       | 3.416121459 |
| HLA-DMA       | -1.146425602             | 3.756490497               | -4.757719542 | 7.69E-06       | 3.363162541 |
| B3GALNT2      | 0.452206093              | 1.431484281               | 4.705714104  | 9.43E-06       | 3.186879437 |
| MIR4479       | 0.745546805              | 0.743588183               | 4.691144589  | 9.98E-06       | 3.137684004 |
| C1QB          | -1.58772833              | 5.39687012                | -4.660296584 | 1.13E-05       | 3.033801801 |
| C1QC          | -1.513892644             | 6.131019252               | -4.646886926 | 1.19E-05       | 2.98876324  |
| MS4A4A        | -1.063558689             | 2.152367956               | -4.606822839 | 1.38E-05       | 2.854635941 |
| FAM26F        | -0.860349079             | 2.16224982                | -4.568533263 | 1.60E-05       | 2.727064878 |
| RP11-700A24.1 | 0.411573846              | 0.390295926               | 4.500658159  | 2.08E-05       | 2.502427295 |
| TNFAIP8L2     | -0.840079025             | 2.002444798               | -4.487733685 | 2.19E-05       | 2.45987404  |
| MS4A6A        | -1.025175557             | 2.262413582               | -4.481011549 | 2.24E-05       | 2.43776998  |
| RNU7-180P     | 0.636889257              | 0.256767707               | 4.469625655  | 2.34E-05       | 2.400374613 |
| LST1          | -0.832405928             | 1.653633634               | -4.430304317 | 2.72E-05       | 2.271660515 |
| RP11-733O18.1 | -0.493688023             | 0.68415136                | -4.406787853 | 2.97E-05       | 2.195004379 |
| MNDA          | -0.760672407             | 1.636466085               | -4.389407547 | 3.17E-05       | 2.138506699 |
| PYCARD        | -0.83598238              | 2.316241593               | -4.387163033 | 3.20E-05       | 2.13122027  |
| HLA-DPB1      | -1.165752218             | 5.050715901               | -4.378572544 | 3.31E-05       | 2.103353387 |
| PILRA         | -0.678004738             | 1.8673977                 | -4.377837975 | 3.31E-05       | 2.100972027 |
| MTCL1         | 0.429135554              | 1.274865439               | 4.37550363   | 3.34E-05       | 2.093406027 |
| EFCAB14P1     | 0.215922802              | 0.271327918               | 4.372637774  | 3.38E-05       | 2.084120634 |

|              |              |             |              |             |             |
|--------------|--------------|-------------|--------------|-------------|-------------|
| TPR          | 0.504847198  | 3.42565203  | 4.34908563   | 3.69E-05    | 2.007950607 |
| HLA-DMB      | -0.8708376   | 2.131250498 | -4.346444771 | 3.73E-05    | 1.999425315 |
| CTD-3099C6.9 | 0.603524582  | 1.938527356 | 4.329333558  | 3.97E-05    | 1.944262615 |
| RP11-848P1.3 | -1.109403728 | 2.589474766 | -4.316626901 | 4.17E-05    | 1.903384926 |
| CD14         | -1.345057004 | 4.853030055 | -4.311846542 | 4.24E-05    | 1.888025354 |
| TMEM150A     | -0.593918207 | 2.423715202 | -4.302554609 | 4.39E-05    | 1.85819962  |
| NCF1B        | -0.479811396 | 0.617424069 | -4.299628653 | 4.44E-05    | 1.848815893 |
| KDM2A        | 0.486972828  | 3.733828047 | 4.299031515  | 4.45E-05    | 1.846901313 |
| LRRC25       | -0.824979956 | 1.979614693 | -4.29070176  | 4.59E-05    | 1.820210982 |
| CD74         | -1.358961472 | 7.580497164 | -4.278004588 | 4.81E-05    | 1.779587755 |
| HLA-DRB1     | -1.326196672 | 6.532075456 | -4.275573286 | 4.86E-05    | 1.77181753  |
| CRYZP1       | 0.240098548  | 0.251544625 | 4.273100467  | 4.90E-05    | 1.763917411 |
| NCF1         | -0.513482592 | 0.76713023  | -4.27130499  | 4.93E-05    | 1.758183022 |
| ITGAM        | -0.737603869 | 1.572105565 | -4.248888932 | 5.36E-05    | 1.686716231 |
| SRIP2        | 0.224682929  | 0.100518602 | 4.233274727  | 5.68E-05    | 1.637073058 |
| BDH2         | -0.507552183 | 2.38430639  | -4.221044473 | 5.94E-05    | 1.598268247 |
| PCED1B-AS1   | -0.557298868 | 0.866420055 | -4.219824254 | 5.97E-05    | 1.594400516 |
| ADAP2        | -0.885196246 | 2.494764729 | -4.216495993 | 6.04E-05    | 1.583854479 |
| CXCL16       | -0.734783097 | 3.540526841 | -4.216304505 | 6.04E-05    | 1.58324788  |
| MBNL1-AS1    | 0.430386907  | 0.74507464  | 4.210010446  | 6.18E-05    | 1.563319124 |
| CPEB3        | 0.385339376  | 0.751164625 | 4.177798865  | 6.96E-05    | 1.461621173 |
| RN7SL138P    | -1.210977847 | 2.793929349 | -4.160451892 | 7.42E-05    | 1.407057852 |
| REEP5        | -0.398346489 | 4.339927909 | -4.131991414 | 8.23E-05    | 1.317850442 |
| RP11-54D18.4 | 0.362183831  | 0.529562801 | 4.127290928  | 8.37E-05    | 1.303154652 |
| APOA1-AS     | 0.259117976  | 0.332983427 | 4.114830102  | 8.76E-05    | 1.264248393 |
| CD37         | -0.701560716 | 1.804755224 | -4.085396553 | 9.74E-05    | 1.172648505 |
| DGKH         | 0.368712609  | 1.114228115 | 4.067082912  | 0.000104046 | 1.115868925 |
| CXorf21      | -0.534566578 | 0.99658538  | -4.063076714 | 0.000105558 | 1.103470131 |
| HMGA1P2      | 0.44650412   | 0.748063923 | 4.06079249   | 0.000106429 | 1.096404229 |
| UCKL1-AS1    | 0.357918679  | 0.500121303 | 4.060418433  | 0.000106573 | 1.095247386 |
| FCGR1C       | -0.472098357 | 0.588319401 | -4.040789399 | 0.000114363 | 1.034638038 |
| RP11-211G3.2 | 0.355048182  | 0.501200974 | 4.040539027  | 0.000114466 | 1.033866191 |
| VAMP8        | -1.089331323 | 4.432809335 | -4.037932896 | 0.000115541 | 1.025833844 |

|              |              |             |              |             |             |
|--------------|--------------|-------------|--------------|-------------|-------------|
| CORO1A       | -0.823866592 | 2.350943582 | -4.030266274 | 0.000118761 | 1.002224188 |
| C3AR1        | -0.848800625 | 2.579125141 | -4.029425502 | 0.000119119 | 0.999636781 |
| LILRA1       | -0.227794437 | 0.28972782  | -4.022211384 | 0.000122237 | 0.977450435 |
| KRT18P55     | 0.222111633  | 0.103250956 | 4.015595532  | 0.000125165 | 0.957126881 |
| USP37        | 0.376841086  | 0.963542336 | 4.009682566  | 0.000127838 | 0.938981122 |
| STAB1        | -1.016176526 | 3.435109895 | -4.005091663 | 0.000129951 | 0.924904627 |
| RP11-458F8.2 | 0.50162643   | 1.291599521 | 4.003681885  | 0.000130607 | 0.920584132 |
| RP11-430C1.2 | 0.456807376  | 0.357035676 | 3.998272289  | 0.000133152 | 0.904014822 |
| LILRB2       | -0.643239639 | 1.23339763  | -3.995802252 | 0.00013433  | 0.89645413  |
| CEBPA        | -0.776886559 | 2.032466725 | -3.994948812 | 0.000134739 | 0.893842497 |
| PCED1B       | -0.532054999 | 1.057293246 | -3.993138844 | 0.000135612 | 0.888304986 |
| ADRB2        | -0.227326163 | 0.419103752 | -3.979883402 | 0.000142165 | 0.847801035 |
| FGL2         | -0.867201485 | 1.993798835 | -3.979041254 | 0.000142591 | 0.84523073  |
| ARHGAP9      | -0.582052539 | 1.40408291  | -3.978112748 | 0.000143063 | 0.842397274 |
| ZC3HAV1L     | 0.70209976   | 2.831427187 | 3.976806896  | 0.000143729 | 0.838413034 |
| RTEL1        | 0.236558813  | 0.468386327 | 3.974629355  | 0.000144845 | 0.83177114  |
| ADORA3       | -0.554998738 | 1.198636342 | -3.972106291 | 0.00014615  | 0.82407835  |
| HOMER3       | -0.605756982 | 3.713684961 | -3.969827724 | 0.000147338 | 0.817133806 |
| PROZ         | 0.217686009  | 0.189813357 | 3.959467617  | 0.000152855 | 0.785591907 |
| FCER1G       | -1.172044894 | 5.257895108 | -3.958564029 | 0.000153346 | 0.782843479 |
| MIR4665      | 0.478675965  | 0.393648236 | 3.955754944  | 0.00015488  | 0.774301789 |
| SIGLEC1      | -0.829866778 | 1.597309775 | -3.944462562 | 0.000161198 | 0.740005302 |
| EIF1AX-AS1   | 0.373606661  | 0.291969154 | 3.941876828  | 0.00016268  | 0.732161264 |
| HCLS1        | -0.73561228  | 2.921832341 | -3.938378497 | 0.000164704 | 0.721554241 |
| BEX4         | -0.782247428 | 2.710635364 | -3.934400681 | 0.000167035 | 0.709501043 |
| RNA5SP21     | 0.34623029   | 0.211382282 | 3.932539419  | 0.000168137 | 0.703864016 |
| NPC2         | -0.862595336 | 5.504269655 | -3.927447285 | 0.000171187 | 0.688451059 |
| FCGR2B       | -0.476583849 | 0.669645041 | -3.927036764 | 0.000171435 | 0.687209068 |
| NCF1C        | -0.713725837 | 1.138746161 | -3.924371875 | 0.000173054 | 0.679148818 |
| CD163        | -1.077046218 | 2.734002916 | -3.902197378 | 0.000187107 | 0.612221855 |
| ARHGDIB      | -0.856497571 | 5.099836882 | -3.887738587 | 0.000196851 | 0.568719705 |
| FRY          | 0.337628037  | 0.652479371 | 3.886875226  | 0.000197448 | 0.566125551 |
| CYBB         | -1.080848509 | 2.971710912 | -3.882770478 | 0.00020031  | 0.553797283 |

|               |              |             |              |             |             |
|---------------|--------------|-------------|--------------|-------------|-------------|
| AC027612.4    | 0.203711307  | 0.141917606 | 3.872388031  | 0.000207726 | 0.522653735 |
| MMS22L        | 0.319137391  | 0.918823284 | 3.871717647  | 0.000208214 | 0.520644766 |
| RPL12P29      | 0.25251574   | 0.178270651 | 3.870670251  | 0.000208978 | 0.517506458 |
| snoU109       | 0.687787424  | 2.107467714 | 3.864675282  | 0.000213404 | 0.499554827 |
| MPEG1         | -0.973163837 | 2.888496931 | -3.8629874   | 0.000214667 | 0.494503949 |
| IL10RA        | -0.697453414 | 1.648851112 | -3.859699907 | 0.000217146 | 0.484670636 |
| FCGR2A        | -0.914014327 | 2.932072394 | -3.847217549 | 0.00022681  | 0.447386059 |
| RP11-304L19.1 | 0.310890704  | 0.508182048 | 3.84698028   | 0.000226997 | 0.446678136 |
| LPXN          | -0.603000128 | 2.193808612 | -3.842859155 | 0.00023028  | 0.434386955 |
| TLR7          | -0.494126606 | 0.790183927 | -3.840863711 | 0.000231885 | 0.428438804 |
| RNU7-18P      | 0.523079556  | 0.398692682 | 3.840349471  | 0.000232301 | 0.426906264 |
| PIK3R5        | -0.402838266 | 0.900145069 | -3.836990596 | 0.000235032 | 0.416899568 |
| CD86          | -0.704855709 | 1.96318571  | -3.835234944 | 0.000236472 | 0.411671539 |
| SLCO2B1       | -0.78847499  | 2.17632366  | -3.814467746 | 0.000254156 | 0.349954414 |
| RP11-108M9.3  | 0.406868234  | 0.31341613  | 3.807248783  | 0.000260593 | 0.328554412 |
| IKZF1         | -0.39703286  | 0.621490652 | -3.80502266  | 0.000262609 | 0.321960867 |
| ZNF502        | -0.384906228 | 1.512622065 | -3.801135843 | 0.000266165 | 0.310454867 |
| SCAI          | 0.302998463  | 1.064013164 | 3.798346114  | 0.000268746 | 0.30220151  |
| C14orf159     | -0.349429236 | 2.234952514 | -3.79803835  | 0.000269032 | 0.301291254 |
| NOTCH2NL      | 0.255037163  | 0.484866366 | 3.797664412  | 0.00026938  | 0.300185344 |
| GUSBP2        | 0.366576666  | 0.633493567 | 3.795093875  | 0.000271784 | 0.292585087 |
| GIMAP2        | -0.637544467 | 1.792557407 | -3.795006451 | 0.000271866 | 0.292326665 |
| AC108925.1    | 0.328307851  | 0.254791743 | 3.791114807  | 0.000275547 | 0.280827233 |
| CENPL         | 0.500576286  | 2.331455711 | 3.788545106  | 0.000278002 | 0.273238468 |
| AC006486.10   | 0.205225683  | 0.338834916 | 3.785341012  | 0.000281094 | 0.263781195 |
| CD53          | -0.992156747 | 3.609533177 | -3.782422588 | 0.000283938 | 0.255171906 |
| NUPL1         | 0.490190828  | 2.325788376 | 3.775524388  | 0.000290771 | 0.234840575 |
| CNTLN         | 0.407626207  | 1.589808643 | 3.769189674  | 0.000297183 | 0.216192599 |
| HLA-DRA       | -1.201130692 | 7.271355646 | -3.768958021 | 0.00029742  | 0.215511074 |
| CD81          | -0.471968618 | 5.634499355 | -3.767192086 | 0.000299233 | 0.210316637 |
| INTS2         | 0.345121827  | 1.832423953 | 3.758054704  | 0.000308782 | 0.18346625  |
| RP11-849H4.2  | 0.258960346  | 0.539465142 | 3.754340665  | 0.000312746 | 0.17256538  |
| OSBPL2        | 0.363804894  | 2.147270887 | 3.752139097  | 0.000315118 | 0.166107208 |



|               |              |             |              |             |              |
|---------------|--------------|-------------|--------------|-------------|--------------|
| TTC33         | 0.497782332  | 2.222082351 | 3.751877607  | 0.000315401 | 0.165340315  |
| PRR5          | -0.642032653 | 1.967036422 | -3.747929991 | 0.000319702 | 0.153767356  |
| MIR1296       | 0.459790775  | 0.405798514 | 3.745297175  | 0.000322601 | 0.146053608  |
| RP11-160H22.5 | 0.301555768  | 0.313912523 | 3.742055275  | 0.000326205 | 0.136560513  |
| GPR34         | -0.808561176 | 2.075624632 | -3.741528268 | 0.000326795 | 0.135017843  |
| RNU6-1190P    | 0.482617663  | 0.208809056 | 3.728062167  | 0.000342207 | 0.095650818  |
| FCGBP         | -1.085094166 | 1.864773953 | -3.726845898 | 0.000343633 | 0.092100028  |
| CD300A        | -0.650591994 | 1.942064399 | -3.719442719 | 0.000352433 | 0.070504523  |
| ITGB2         | -0.895849781 | 3.324544112 | -3.717339327 | 0.000354972 | 0.064374276  |
| RP11-625H11.2 | 0.37509919   | 0.236320303 | 3.715606781  | 0.000357077 | 0.059326662  |
| POU5F1P4      | 0.249789724  | 0.29552534  | 3.710965103  | 0.000362773 | 0.045811671  |
| TMEM176B      | -1.03550787  | 3.273903673 | -3.70329677  | 0.000372375 | 0.023509984  |
| LY96          | -0.716079036 | 3.230539685 | -3.701043925 | 0.000375241 | 0.016964214  |
| RP11-344B5.2  | -0.583652245 | 1.142565773 | -3.700832332 | 0.000375511 | 0.016349563  |
| AK3P2         | 0.287473917  | 0.201297729 | 3.697845642  | 0.000379346 | 0.007676216  |
| SNX20         | -0.385543873 | 0.685845929 | -3.697396479 | 0.000379926 | 0.006372272  |
| GGTA1P        | -0.58222226  | 1.172958865 | -3.696019403 | 0.00038171  | 0.00237524   |
| SIGLEC7       | -0.479847075 | 0.955539956 | -3.688893005 | 0.000391066 | -0.01829279  |
| LGALS9        | -0.783156912 | 2.585348798 | -3.681327347 | 0.000401238 | -0.040204084 |
| BRCA1         | 0.393913909  | 1.928017526 | 3.680868091  | 0.000401863 | -0.041533139 |
| CTB-187L3.1   | 0.483804413  | 0.593346357 | 3.676262023  | 0.000408188 | -0.054856334 |
| LAMTOR5       | -0.550719451 | 4.901735023 | -3.669347362 | 0.00041786  | -0.074835138 |
| HCST          | -0.934203757 | 2.085625656 | -3.66822936  | 0.000419444 | -0.078062935 |
| RNA5SP179     | 0.329773555  | 0.195271939 | 3.664634932  | 0.000424576 | -0.088435742 |
| TMSB4X        | -0.765190428 | 9.34831324  | -3.660215    | 0.000430969 | -0.101180948 |
| CTD-2035E11.3 | 0.463345712  | 0.465473347 | 3.656162872  | 0.000436909 | -0.112856012 |
| RP11-777F6.3  | 0.321658071  | 0.322028956 | 3.655638812  | 0.000437683 | -0.114365274 |
| RP4-654C18.1  | 0.488142116  | 0.581060457 | 3.655611556  | 0.000437724 | -0.114443767 |
| HLA-DPA1      | -1.125493311 | 3.923387851 | -3.652271846 | 0.000442687 | -0.124058294 |
| PLS3-AS1      | 0.282732714  | 0.306084812 | 3.652126499  | 0.000442904 | -0.124476588 |
| CYP2S1        | -0.401866028 | 0.806034142 | -3.649672951 | 0.000446586 | -0.131535823 |
| RP11-404E16.1 | 0.315570909  | 0.433954664 | 3.647657706  | 0.000449632 | -0.137331483 |
| SUGT1P3       | 0.236610602  | 0.385489232 | 3.645802781  | 0.000452453 | -0.14266407  |

|                  |              |             |              |             |              |
|------------------|--------------|-------------|--------------|-------------|--------------|
| AC104073.1       | 0.299617391  | 0.107573909 | 3.642473216  | 0.000457559 | -0.152231172 |
| CX3CR1           | -0.712631862 | 1.003586776 | -3.633096578 | 0.000472234 | -0.179140469 |
| CTD-2008P7.5     | 0.306255637  | 0.179359349 | 3.63216405   | 0.000473718 | -0.181813967 |
| ADPRHL2          | -0.446848197 | 4.319310985 | -3.630897483 | 0.00047574  | -0.185444352 |
| HLA-DOA          | -0.748038482 | 1.766469637 | -3.630757525 | 0.000475964 | -0.185845458 |
| KATNAL1          | 0.344492585  | 1.593202144 | 3.62654879   | 0.000482746 | -0.197902239 |
| CTD-2216M2.1     | 0.268937728  | 0.284981758 | 3.623849304  | 0.000487143 | -0.205630229 |
| PTPN6            | -0.667876752 | 2.00293147  | -3.621652479 | 0.00049075  | -0.211916198 |
| FCGR1A           | -0.69106626  | 1.304275478 | -3.621032389 | 0.000491773 | -0.213690024 |
| RFX3             | 0.287262086  | 0.768821696 | 3.619793504  | 0.000493822 | -0.217233326 |
| PRDM10           | 0.280044052  | 1.292906987 | 3.619379756  | 0.000494509 | -0.218416483 |
| RP11-315A16.1    | 0.3268526    | 0.135229195 | 3.617839492  | 0.000497071 | -0.222820185 |
| ZMYND15          | -0.324986817 | 0.653310783 | -3.614460665 | 0.000502737 | -0.232475765 |
| CTD-2012K14.2    | 0.204085567  | 0.163770322 | 3.613679966  | 0.000504054 | -0.234705832 |
| CD180            | -0.356329325 | 0.681517934 | -3.612994729 | 0.000505214 | -0.236662929 |
| CMTM3            | -0.480269237 | 4.715866747 | -3.612736377 | 0.000505651 | -0.237400735 |
| TCN2             | -0.679524376 | 2.31084513  | -3.611608893 | 0.000507566 | -0.240620187 |
| LILRA2           | -0.208097941 | 0.305648685 | -3.607713291 | 0.000514234 | -0.251738289 |
| CTD-2568A17.8    | 0.300797971  | 0.27675256  | 3.601001616  | 0.000525918 | -0.270873394 |
| HNRNPA1P54       | 0.303868337  | 0.153038711 | 3.60069501   | 0.000526457 | -0.271746925 |
| LRP8             | 0.413811091  | 1.271680873 | 3.600676886  | 0.000526489 | -0.271798558 |
| CARD11           | -0.351183794 | 0.723291318 | -3.600223421 | 0.000527289 | -0.273090394 |
| SAMHD1           | -0.648441737 | 4.295941818 | -3.597250205 | 0.000532557 | -0.281557635 |
| RNU6-1282P       | 0.335108949  | 0.145619541 | 3.593418083  | 0.000539422 | -0.292463519 |
| WDR90            | 0.363530314  | 1.285992865 | 3.59061573   | 0.000544495 | -0.300433497 |
| RP11-661D19.1    | 0.345477458  | 0.290709949 | 3.590310274  | 0.00054505  | -0.301301956 |
| XXbac-B476C20.14 | 0.396289995  | 0.279787729 | 3.588304872  | 0.000548712 | -0.3070023   |
| LRRRC8E          | 0.359925731  | 0.840644429 | 3.587645339  | 0.000549921 | -0.30887652  |
| UHRF1BP1L        | 0.407292079  | 2.227919569 | 3.587264021  | 0.000550621 | -0.309960014 |
| LPAR5            | -0.587302485 | 1.477495417 | -3.58615315  | 0.000552666 | -0.313116019 |
| RP5-1091N2.9     | -0.264240432 | 0.455193751 | -3.585903257 | 0.000553127 | -0.313825873 |
| EDEM3            | 0.508777844  | 3.008396909 | 3.584229814  | 0.000556224 | -0.318578597 |
| TLR2             | -0.584523635 | 1.531182384 | -3.583173898 | 0.000558186 | -0.32157667  |

|               |              |             |              |             |              |
|---------------|--------------|-------------|--------------|-------------|--------------|
| HVCN1         | -0.427622925 | 1.702829481 | -3.583063781 | 0.000558391 | -0.32188929  |
| LINC01476     | 0.224518274  | 0.153716918 | 3.582798636  | 0.000558885 | -0.322642004 |
| AL050335.1    | 0.755627695  | 0.267701086 | 3.579302056  | 0.000565438 | -0.332564609 |
| MIR4442       | 1.140707989  | 3.675274254 | 3.578397976  | 0.000567144 | -0.335129078 |
| RP11-365O16.5 | 0.311657046  | 0.186256172 | 3.576710813  | 0.000570341 | -0.339913558 |
| ARRB2         | -0.572419572 | 3.181063116 | -3.574689497 | 0.000574194 | -0.3456435   |
| HOXB-AS2      | 0.223487866  | 0.327129495 | 3.572339114  | 0.000578704 | -0.35230334  |
| SPATA21       | 0.254602488  | 0.153327689 | 3.571014448  | 0.000581261 | -0.356055408 |
| UBA52         | -0.471003643 | 6.882761709 | -3.570931205 | 0.000581422 | -0.356291158 |
| ODCP          | 0.223575141  | 0.310760185 | 3.569426489  | 0.000584341 | -0.360551929 |
| PGAM1P9       | 0.205518291  | 0.176212399 | 3.569111631  | 0.000584953 | -0.361443319 |
| SCN1B         | -0.538498179 | 1.577684886 | -3.567756342 | 0.000587596 | -0.365279622 |
| GIMAP1        | -0.467468948 | 1.100191804 | -3.564117085 | 0.000594749 | -0.375575766 |
| SRGN          | -1.0306177   | 4.904301258 | -3.563417748 | 0.000596133 | -0.377553457 |
| PRSS48        | 0.292521752  | 0.254923365 | 3.560984425  | 0.000600973 | -0.384432592 |
| VPS13A        | 0.331631774  | 0.949827741 | 3.55996346   | 0.000603014 | -0.387317908 |
| FOLR2         | -1.097815941 | 4.181972005 | -3.557506874 | 0.000607953 | -0.39425794  |
| PARVB         | -0.465593478 | 2.647628976 | -3.557313946 | 0.000608343 | -0.394802828 |
| CD52          | -0.927353088 | 1.899383598 | -3.556147666 | 0.000610702 | -0.398096314 |
| VAMP5         | -0.822039919 | 5.382612173 | -3.554250591 | 0.000614559 | -0.403451848 |
| FCGR1B        | -0.249041927 | 0.330712982 | -3.553001082 | 0.000617112 | -0.406978145 |
| TNK2-AS1      | 0.249294941  | 0.408385891 | 3.552663577  | 0.000617803 | -0.407930479 |
| RP11-64D24.2  | 0.253373285  | 0.148742417 | 3.550718014  | 0.000621803 | -0.413418985 |
| RP11-115H15.2 | 0.382465287  | 0.360881295 | 3.550202783  | 0.000622866 | -0.414872108 |
| IRF8          | -0.510625792 | 1.161198187 | -3.549441739 | 0.000624439 | -0.417018225 |
| RP5-1021I20.5 | 0.240690359  | 0.248167394 | 3.546120396  | 0.000631351 | -0.426380408 |
| RNU6-879P     | 0.449281696  | 0.404958418 | 3.545927015  | 0.000631755 | -0.426925312 |
| CAPNS1        | -0.48364086  | 6.323072824 | -3.544853548 | 0.000634006 | -0.429949722 |
| LSM10         | -0.414375691 | 4.512961596 | -3.543613713 | 0.000636615 | -0.433442034 |
| RP11-274J7.2  | 0.229967526  | 0.165899322 | 3.540038053  | 0.000644196 | -0.443508854 |
| RP5-1153D9.5  | 0.2163341    | 0.137067256 | 3.53985425   | 0.000644588 | -0.444026128 |
| MS4A7         | -0.832288075 | 2.43197401  | -3.533083444 | 0.000659186 | -0.463067607 |
| CCL2          | -0.964779538 | 2.029317839 | -3.532173007 | 0.000661172 | -0.465626006 |

|               |              |             |              |             |              |
|---------------|--------------|-------------|--------------|-------------|--------------|
| KCNJ5         | -0.356628035 | 0.76949008  | -3.531637228 | 0.000662344 | -0.467131365 |
| RP11-2G1.1    | 0.388054147  | 0.154874931 | 3.525857294  | 0.00067511  | -0.483360501 |
| RP11-110H1.8  | 0.309183018  | 0.154247756 | 3.525115465  | 0.000676765 | -0.485442043 |
| ZNF483        | 0.25034611   | 0.340161572 | 3.523211279  | 0.000681031 | -0.490783657 |
| FAM168A       | 0.416733532  | 3.611821844 | 3.522133663  | 0.000683457 | -0.493805652 |
| TTC14         | 0.407787104  | 1.780383704 | 3.5220661    | 0.000683609 | -0.493995099 |
| SMARCA2       | 0.519956324  | 3.613394332 | 3.521960244  | 0.000683848 | -0.494291914 |
| ME1           | 0.692916507  | 3.358302332 | 3.521095403  | 0.000685802 | -0.496716647 |
| BNIP3P42      | 0.268288306  | 0.257535117 | 3.51763872   | 0.000693663 | -0.506403734 |
| SIAH2-AS1     | 0.331860054  | 0.492591142 | 3.516973744  | 0.000695185 | -0.508266485 |
| COMMD1        | -0.355776072 | 3.372270752 | -3.516877205 | 0.000695407 | -0.508536892 |
| HPGDS         | -0.550980961 | 1.153014139 | -3.516681419 | 0.000695855 | -0.509085276 |
| VAV1          | -0.539821327 | 1.251937734 | -3.516268585 | 0.000696803 | -0.51024152  |
| ANKRD26       | 0.356761223  | 1.30867693  | 3.515452242  | 0.00069868  | -0.512527603 |
| FCGR2C        | -0.442182963 | 0.735109889 | -3.514587195 | 0.000700674 | -0.514949653 |
| AC092638.1    | 0.207808607  | 0.069004683 | 3.514209625  | 0.000701546 | -0.516006678 |
| MPP1          | -0.466639558 | 2.720046501 | -3.511197781 | 0.000708539 | -0.524435523 |
| CAPG          | -0.821989903 | 4.652752099 | -3.508797055 | 0.000714161 | -0.531150347 |
| P2RY13        | -0.409751696 | 0.65748973  | -3.505619572 | 0.000721666 | -0.540032619 |
| CASP1         | -0.601459697 | 1.667363026 | -3.504341988 | 0.000724705 | -0.5436023   |
| RP11-82O19.2  | 0.221644824  | 0.334406449 | 3.50345451   | 0.000726823 | -0.546081432 |
| TNFSF8        | -0.356506903 | 0.697665378 | -3.503231882 | 0.000727355 | -0.546703263 |
| AL355480.1    | 0.727892949  | 0.892228038 | 3.502496687  | 0.000729115 | -0.548756558 |
| C11orf30      | 0.327442686  | 1.605002332 | 3.496229589  | 0.000744283 | -0.566246918 |
| CTSS          | -0.874990046 | 3.466590341 | -3.496070181 | 0.000744673 | -0.566691499 |
| HOXA6         | 0.467957397  | 1.024796403 | 3.493941469  | 0.000749895 | -0.572626961 |
| RP4-646N3.1   | 0.230321639  | 0.30762211  | 3.491944321  | 0.000754826 | -0.578193187 |
| RP11-407N17.2 | 0.374447201  | 0.162626567 | 3.49146694   | 0.000756009 | -0.579523345 |
| IGFLR1        | -0.278789988 | 0.716720581 | -3.490995565 | 0.000757179 | -0.580836638 |
| LINC01034     | 0.20201327   | 0.074224929 | 3.486520604  | 0.000768372 | -0.593297828 |
| TAF9          | -0.490500211 | 3.789297101 | -3.486257882 | 0.000769034 | -0.594029052 |
| RBM26-AS1     | 0.310145227  | 0.562310044 | 3.484391733  | 0.000773751 | -0.599221885 |
| RP5-1031D4.3  | -0.245105477 | 0.33107544  | -3.480791089 | 0.00078293  | -0.609235452 |

|                 |              |             |              |             |              |
|-----------------|--------------|-------------|--------------|-------------|--------------|
| RP5-843L14.1    | 0.235719637  | 0.0914868   | 3.470954961  | 0.000808533 | -0.636551575 |
| Clostridiales-1 | 0.426107012  | 0.219595158 | 3.470247947  | 0.000810403 | -0.638512859 |
| FTL             | -0.59079508  | 10.90788896 | -3.46913937  | 0.000813344 | -0.6415875   |
| CRYBB1          | -0.452749062 | 0.939275667 | -3.469071741 | 0.000813524 | -0.641775046 |
| NOS2            | 0.410694138  | 0.690168314 | 3.46512427   | 0.000824081 | -0.652717364 |
| MMP20           | 0.660119352  | 0.472370802 | 3.46226479   | 0.000831808 | -0.660638082 |
| ZNF770          | 0.510377922  | 2.408078197 | 3.462238071  | 0.000831881 | -0.66071207  |
| RP11-545I10.2   | 0.585450642  | 0.313641529 | 3.46193241   | 0.000832711 | -0.661558458 |
| RP11-571O6.2    | 0.203933842  | 0.15802249  | 3.461049403  | 0.000835114 | -0.664003232 |
| NPAT            | 0.43244376   | 1.975873324 | 3.455682414  | 0.000849858 | -0.678852915 |
| RP11-110H1.9    | 0.211365698  | 0.123613746 | 3.453694721  | 0.00085538  | -0.684348276 |
| AC009229.5      | 0.262517954  | 0.205639634 | 3.453510678  | 0.000855893 | -0.684856982 |
| HLA-DQA1        | -0.947701436 | 2.574956377 | -3.45187465  | 0.000860467 | -0.689378174 |
| CTB-43E15.1     | 0.249796104  | 0.097672838 | 3.451484139  | 0.000861562 | -0.690457125 |
| IGHMBP2         | 0.326637507  | 2.042568489 | 3.448353934  | 0.000870387 | -0.699102393 |
| NFAM1           | -0.502466    | 1.375394478 | -3.446548445 | 0.000875516 | -0.70408632  |
| RP11-856B14.10  | 0.427878436  | 0.194867508 | 3.445718325  | 0.000877884 | -0.706377165 |
| MIR6865         | 0.25043876   | 0.169625983 | 3.444060985  | 0.000882629 | -0.710949634 |
| RP11-351C8.1    | 0.307786964  | 0.111359154 | 3.443826331  | 0.000883303 | -0.711596896 |
| RNU2-30P        | 0.431248037  | 0.242297256 | 3.441820831  | 0.000889082 | -0.717127464 |
| RP11-1212A22.1  | 0.307562271  | 0.594938289 | 3.439562761  | 0.000895631 | -0.723351706 |
| OR4K2           | 0.266853117  | 0.099878863 | 3.439089667  | 0.000897009 | -0.724655381 |
| SAMSN1          | -0.454046092 | 1.081813996 | -3.437189935 | 0.000902562 | -0.729889022 |
| CCDC88B         | -0.315139603 | 0.914706444 | -3.434207945 | 0.000911344 | -0.738099907 |
| AC000403.1      | 0.720046897  | 1.45927598  | 3.431989195  | 0.000917931 | -0.744205808 |
| RAVER1          | 0.522934101  | 3.1394545   | 3.431241024  | 0.000920162 | -0.746264084 |
| SETP20          | 0.288176998  | 0.461962501 | 3.429683655  | 0.000924822 | -0.750547463 |
| CKLF            | -0.518418059 | 2.940196158 | -3.428605735 | 0.000928061 | -0.753511329 |
| KIAA1958        | 0.404636739  | 0.850674811 | 3.427349582  | 0.000931849 | -0.756964395 |
| CEP85           | 0.424385398  | 2.555246522 | 3.423645143  | 0.000943104 | -0.767142167 |
| CBL             | 0.449490534  | 2.42464146  | 3.42342933   | 0.000943764 | -0.767734853 |
| GS1-309P15.4    | 0.2362053    | 0.238753097 | 3.422871381  | 0.000945472 | -0.769267013 |
| PFDN1           | -0.352176378 | 4.216610786 | -3.421242167 | 0.000950474 | -0.773739879 |

|               |              |             |              |             |              |
|---------------|--------------|-------------|--------------|-------------|--------------|
| TMC1          | 0.232466516  | 0.195231021 | 3.421023128  | 0.000951148 | -0.77434111  |
| KLK1          | 0.525123653  | 0.636301254 | 3.420515023  | 0.000952715 | -0.775735679 |
| CD24P2        | 0.280604625  | 0.273706993 | 3.418860552  | 0.000957831 | -0.780275557 |
| AP001055.6    | -0.202284709 | 0.29486161  | -3.414514298 | 0.000971397 | -0.792193959 |
| LLNLR-470E3.1 | -0.347484472 | 0.478086775 | -3.413482914 | 0.000974642 | -0.795020599 |
| MIR548AA1     | 0.558337576  | 0.510486199 | 3.412567344  | 0.000977532 | -0.797529302 |
| RP11-560I19.2 | 0.363176818  | 0.21259997  | 3.410245055  | 0.000984898 | -0.803890247 |
| RP11-330L19.2 | 0.386909502  | 0.368970463 | 3.409438858  | 0.000987467 | -0.806097738 |
| SRP14         | -0.401047573 | 6.252260934 | -3.409210826 | 0.000988195 | -0.806722053 |
| C5orf42       | 0.375689788  | 1.416647424 | 3.408101764  | 0.000991742 | -0.809758053 |
| RP11-158H5.8  | 0.324539457  | 0.26700558  | 3.407249458  | 0.000994476 | -0.812090698 |
| SPEN          | 0.455944461  | 3.028381756 | 3.406839563  | 0.000995793 | -0.813212369 |
| AHCTF1        | 0.363834381  | 2.416648916 | 3.40673459   | 0.000996131 | -0.813499612 |
| IRAK1BP1      | 0.371896069  | 0.626502044 | 3.405859336  | 0.000998951 | -0.815894343 |
| PSIP1         | 0.629825471  | 3.684451337 | 3.404875139  | 0.00100213  | -0.818586602 |
| TYROBP        | -1.054620024 | 6.187481804 | -3.400482772 | 0.001016437 | -0.830594827 |
| RP11-466F5.6  | 0.266052112  | 0.176898479 | 3.400309731  | 0.001017004 | -0.831067667 |
| RP4-799G3.2   | 0.209568738  | 0.073222924 | 3.398749779  | 0.001022134 | -0.835329465 |
| CTSB          | -0.627406708 | 6.958437428 | -3.3980149   | 0.001024559 | -0.837336654 |
| LILRB5        | -0.499965287 | 0.853051012 | -3.396826167 | 0.001028493 | -0.840582786 |
| BX842568.4    | 0.323078489  | 0.386921999 | 3.395903196  | 0.001031557 | -0.843102604 |
| TXNRD1        | 0.48364451   | 3.800336922 | 3.394875233  | 0.00103498  | -0.845908462 |
| NCR3LG1       | 0.598641961  | 1.293695408 | 3.392870261  | 0.001041687 | -0.851379285 |
| CTD-2201E18.5 | 0.253388781  | 0.51999688  | 3.390265523  | 0.001050462 | -0.858483056 |
| RP11-165F24.2 | 0.303465256  | 0.170598706 | 3.387494464  | 0.001059874 | -0.866035969 |
| UQCRBP2       | 0.306880632  | 0.172223614 | 3.386594801  | 0.001062946 | -0.868487139 |
| CCL4L1        | -0.568953176 | 1.069473968 | -3.385199908 | 0.001067727 | -0.872286627 |
| TOPBP1        | 0.419415665  | 3.139280076 | 3.384087844  | 0.001071552 | -0.875314893 |
| ANP32BP1      | 0.409297708  | 1.152363909 | 3.384056828  | 0.001071659 | -0.875399341 |
| MFNG          | -0.467087324 | 1.543641777 | -3.38294477  | 0.001075498 | -0.87842683  |
| HMHA1         | -0.529827704 | 2.377570233 | -3.382339787 | 0.001077592 | -0.880073538 |
| AL390718.1    | 0.558372134  | 0.207041671 | 3.380319728  | 0.001084611 | -0.885570356 |
| MRC1          | -0.729320504 | 1.850771663 | -3.380283769 | 0.001084737 | -0.885668183 |

|               |              |             |              |             |              |
|---------------|--------------|-------------|--------------|-------------|--------------|
| PTAFR         | -0.625587725 | 1.917051386 | -3.380118374 | 0.001085313 | -0.88611813  |
| RP11-4M23.7   | 0.397188345  | 0.212193206 | 3.379790363  | 0.001086458 | -0.887010418 |
| CD63          | -0.591910617 | 8.211765407 | -3.378765711 | 0.00109004  | -0.889797354 |
| DIDO1         | 0.315846194  | 2.467220139 | 3.376026188  | 0.001099674 | -0.897245458 |
| RPL35AP       | 0.370982056  | 0.182100167 | 3.373980284  | 0.00110692  | -0.902804836 |
| RNU6ATAC11P   | 0.390873727  | 0.160328947 | 3.372973931  | 0.001110501 | -0.905538498 |
| TNFSF13B      | -0.639061122 | 1.476319962 | -3.368471482 | 0.001126655 | -0.917761518 |
| ETF1P2        | 0.250343995  | 0.315077136 | 3.367419089  | 0.001130463 | -0.920616743 |
| STRIP1        | -0.330420348 | 2.631244422 | -3.36653533  | 0.00113367  | -0.923013937 |
| RP11-55J15.2  | 0.210638582  | 0.142539808 | 3.36478471   | 0.001140048 | -0.927761098 |
| ACTB          | -0.41513323  | 10.70632938 | -3.362674246 | 0.001147781 | -0.933481597 |
| GIMAP4        | -0.765076502 | 3.001996328 | -3.362624138 | 0.001147965 | -0.933617384 |
| MSR1          | -0.66182758  | 2.079533196 | -3.361994584 | 0.001150282 | -0.935323279 |
| RP11-348P10.2 | -0.283483563 | 0.841738998 | -3.361402741 | 0.001152464 | -0.936926768 |
| RNU6-673P     | 0.441778163  | 0.161261258 | 3.361223985  | 0.001153124 | -0.937411034 |
| MIR4516       | 0.408846725  | 0.445382361 | 3.360487366  | 0.001155847 | -0.939406395 |
| SLFNL1-AS1    | 0.215349877  | 0.524977293 | 3.35757054   | 0.001166687 | -0.947304308 |
| RP11-2117.1   | 0.213938327  | 0.118744631 | 3.35644792   | 0.001170885 | -0.950342666 |
| SS18L2        | -0.396503576 | 2.932773707 | -3.353896482 | 0.001180478 | -0.957245278 |
| SMAD9         | 0.719070067  | 2.172689245 | 3.353333141  | 0.001182606 | -0.958768801 |
| YY1P1         | 0.325205142  | 0.215907083 | 3.352037498  | 0.001187514 | -0.962272062 |
| CAV2          | -0.524914109 | 1.879020196 | -3.351928585 | 0.001187928 | -0.962566503 |
| HLA-DQB1      | -0.979168834 | 3.103158331 | -3.351795734 | 0.001188432 | -0.96292565  |
| GAPVD1        | 0.333296081  | 2.406923805 | 3.35146016   | 0.001189707 | -0.963832787 |
| RALBP1        | 0.409686398  | 3.944988371 | 3.349709577  | 0.001196381 | -0.968563931 |
| RP11-177J6.1  | -0.372316734 | 0.810122341 | -3.348059215 | 0.001202704 | -0.973022519 |
| EIF4EP1       | 0.277636119  | 0.381975311 | 3.347697878  | 0.001204093 | -0.973998481 |
| LMAN1         | 0.456813896  | 5.264082678 | 3.347490043  | 0.001204893 | -0.974559802 |
| ASH1L         | 0.507850153  | 2.801431055 | 3.347315446  | 0.001205565 | -0.975031334 |
| RP4-545K15.5  | 0.296510834  | 0.650217865 | 3.346117322  | 0.001210185 | -0.978266594 |
| AC005624.2    | 0.424516846  | 0.817452163 | 3.345722056  | 0.001211713 | -0.979333728 |
| HLA-DQB2      | -0.600189285 | 0.999338858 | -3.342716984 | 0.00122339  | -0.987443697 |
| RP11-144G7.2  | 0.224411307  | 0.170219143 | 3.342710496  | 0.001223415 | -0.9874612   |

|                |              |             |              |             |              |
|----------------|--------------|-------------|--------------|-------------|--------------|
| RNU6-1067P     | 0.5437871    | 0.301058613 | 3.34250378   | 0.001224222 | -0.988018877 |
| CREB3L2        | 0.436545187  | 3.661169948 | 3.341793953  | 0.001226998 | -0.989933639 |
| NDUFAF1        | -0.435850923 | 2.998206912 | -3.339469773 | 0.001236126 | -0.996200993 |
| LCP2           | -0.517043615 | 1.737754949 | -3.338815585 | 0.001238707 | -0.997964478 |
| TMEM176A       | -0.772029819 | 1.882597082 | -3.338440347 | 0.00124019  | -0.998975885 |
| TATDN2P2       | 0.249791211  | 0.506217574 | 3.337698162  | 0.001243127 | -1.000976098 |
| ITCH-AS1       | 0.300321983  | 0.252403309 | 3.336924946  | 0.001246194 | -1.003059586 |
| RP11-386G11.10 | 0.215505889  | 0.373272294 | 3.335783438  | 0.001250736 | -1.006134803 |
| RP1-202O8.2    | 0.323435544  | 0.193384898 | 3.334266092  | 0.001256796 | -1.010221301 |
| WASF4P         | 0.277287483  | 0.612081951 | 3.333634195  | 0.001259328 | -1.011922705 |
| RPL35AP3       | 0.342659204  | 0.163947324 | 3.333587011  | 0.001259517 | -1.012049741 |
| NANOGBNP2      | 0.218875766  | 0.145091426 | 3.332535312  | 0.001263743 | -1.014880909 |
| ATP6V0D1       | -0.399761277 | 3.633296389 | -3.332513787 | 0.001263829 | -1.014938849 |
| KIF14          | 0.456534378  | 1.826263315 | 3.332513645  | 0.00126383  | -1.014939232 |
| AC004470.1     | 0.31920785   | 0.135342751 | 3.331921725  | 0.001266214 | -1.016532374 |
| AC010287.1     | 0.253711386  | 0.261934019 | 3.331132997  | 0.001269397 | -1.018654893 |
| RNU1-85P       | 0.409187571  | 0.193176275 | 3.330594978  | 0.001271573 | -1.02010252  |
| IL7R           | 0.877654543  | 1.971604342 | 3.33012333   | 0.001273483 | -1.021371421 |
| PIWIL3         | 0.509137408  | 0.186170246 | 3.329599735  | 0.001275607 | -1.022779918 |
| SUMO2P16       | 0.245591656  | 0.202318377 | 3.329028903  | 0.001277927 | -1.024315298 |
| CTD-2532N20.1  | -0.205612095 | 0.31827326  | -3.326696828 | 0.001287443 | -1.03058587  |
| TMEM53         | -0.305835252 | 1.437428935 | -3.326615369 | 0.001287776 | -1.030804841 |
| L3MBTL2        | -0.347192717 | 2.600384763 | -3.322551386 | 0.001304523 | -1.04172413  |
| FCGR3A         | -1.076478669 | 3.060164812 | -3.322434194 | 0.001305009 | -1.042038856 |
| COMMD9         | -0.367742562 | 2.462678151 | -3.322349037 | 0.001305362 | -1.042267547 |
| RP11-159F24.6  | 0.438303538  | 0.625256001 | 3.322203442  | 0.001305966 | -1.042658533 |
| ASH1L-IT1      | 0.365441835  | 0.283983159 | 3.32052282   | 0.001312958 | -1.047170808 |
| BLOC1S1        | -0.509723485 | 3.607225158 | -3.318694267 | 0.001320606 | -1.05207831  |
| XK             | 0.20379017   | 0.312943617 | 3.317845965  | 0.001324168 | -1.054354304 |
| SETD1B         | 0.353754766  | 2.880134019 | 3.317003791  | 0.001327713 | -1.056613423 |
| RNU6ATAC19P    | 0.427780866  | 0.143248844 | 3.31687633   | 0.00132825  | -1.056955298 |
| FITM2          | 0.313007507  | 2.499409659 | 3.315387414  | 0.001334542 | -1.060948119 |
| DOK2           | -0.62781405  | 2.328949842 | -3.314553188 | 0.00133808  | -1.06318467  |



|                |              |             |              |             |              |
|----------------|--------------|-------------|--------------|-------------|--------------|
| MRFAP1L1       | -0.447576961 | 4.387826364 | -3.313694578 | 0.00134173  | -1.065486151 |
| UBE2L6         | -0.725209893 | 4.159680015 | -3.31272376  | 0.001345868 | -1.068087863 |
| RP11-274B21.1  | 0.405299195  | 1.143535304 | 3.311796794  | 0.001349831 | -1.070571516 |
| EBI3           | -0.587279136 | 1.09492919  | -3.310504222 | 0.001355375 | -1.074033874 |
| CTC-444N24.9   | 0.281472921  | 0.21615136  | 3.30782228   | 0.001366946 | -1.081214628 |
| RP11-263K19.4  | 0.326305251  | 0.772490196 | 3.307067945  | 0.001370217 | -1.083233528 |
| PGAP3          | -0.466400533 | 2.673079972 | -3.306447843 | 0.001372912 | -1.084892905 |
| AC092638.2     | 0.205153551  | 0.097997497 | 3.306314856  | 0.00137349  | -1.085248743 |
| RP11-214K3.24  | 0.235543441  | 0.196011649 | 3.303780765  | 0.001384558 | -1.092027262 |
| SOWAHD         | -0.283428623 | 0.537197803 | -3.303047458 | 0.001387776 | -1.093988074 |
| COL5A2         | 0.667539081  | 7.854303963 | 3.30304076   | 0.001387806 | -1.094005983 |
| CEP192         | 0.353079124  | 1.951046284 | 3.302287409  | 0.001391119 | -1.096020048 |
| MEIS1-AS2      | 0.24198386   | 0.198577082 | 3.302251108  | 0.001391279 | -1.096117089 |
| MS4A14         | -0.314998481 | 0.605662333 | -3.301303441 | 0.001395459 | -1.098650138 |
| RP11-595B24.1  | 0.286138358  | 0.118973987 | 3.299521461  | 0.001403349 | -1.103411756 |
| RP11-738O11.12 | 0.209809107  | 0.066732226 | 3.299097054  | 0.001405235 | -1.104545525 |
| RN7SL644P      | 0.336137756  | 0.285356176 | 3.295146826  | 0.001422898 | -1.115092954 |
| HADHAP1        | 0.290892038  | 0.53376832  | 3.293692041  | 0.001429456 | -1.11897494  |
| TP53TG5        | 0.306175661  | 0.525263897 | 3.293690572  | 0.001429462 | -1.118978858 |
| AC010323.1     | 0.265331126  | 0.116192151 | 3.293599661  | 0.001429873 | -1.119221403 |
| SLC7A5P1       | 0.355699456  | 0.753986619 | 3.292806113  | 0.001433463 | -1.121338335 |
| RP11-58G13.1   | 0.208401419  | 0.09953924  | 3.292529448  | 0.001434716 | -1.122076297 |
| RP11-97O12.6   | 0.230048167  | 0.339794618 | 3.292124643  | 0.001436552 | -1.12315597  |
| RDX            | 0.478543168  | 3.976172645 | 3.291231974  | 0.001440609 | -1.125536489 |
| GFAP           | 0.201911449  | 0.139753725 | 3.289685198  | 0.001447663 | -1.129660189 |
| RP11-576C12.1  | 0.435993753  | 0.407719921 | 3.28922785   | 0.001449755 | -1.130879194 |
| RNU4-58P       | 0.483678641  | 0.192382008 | 3.289094249  | 0.001450367 | -1.131235268 |
| WIBG           | -0.371839107 | 2.964790472 | -3.28888159  | 0.001451341 | -1.131802024 |
| NEXN-AS1       | 0.384367244  | 0.761600147 | 3.287575844  | 0.001457335 | -1.135281351 |
| LRRFIP1P1      | 0.25083196   | 0.637815438 | 3.285875069  | 0.001465178 | -1.139811713 |
| RP11-701H24.8  | 0.268139201  | 0.313800366 | 3.285744925  | 0.00146578  | -1.140158304 |
| RP11-449J10.1  | 0.236252786  | 0.181855268 | 3.285286387  | 0.001467902 | -1.141379373 |
| AC000120.7     | 0.273922517  | 0.370000429 | 3.284137119  | 0.001473233 | -1.144439261 |

|                |              |             |              |             |              |
|----------------|--------------|-------------|--------------|-------------|--------------|
| ALOX5          | -1.006962886 | 1.746708757 | -3.283336504 | 0.001476958 | -1.146570392 |
| POMK           | 0.544905397  | 2.412381295 | 3.282979528  | 0.001478622 | -1.14752049  |
| RP11-210K20.4  | 0.203385845  | 0.150663165 | 3.282142484  | 0.001482529 | -1.149747984 |
| SECTM1         | -0.792270578 | 2.047059079 | -3.278926746 | 0.001497632 | -1.158301523 |
| UBA7           | -0.508619961 | 2.481441282 | -3.278416023 | 0.001500044 | -1.159659411 |
| RP5-875O13.1   | 0.249306339  | 0.196022681 | 3.276442981  | 0.001509396 | -1.164903735 |
| RNA5SP35       | 0.458167384  | 0.204505762 | 3.275853235  | 0.001512201 | -1.166470808 |
| RP11-654A16.3  | 0.345536337  | 0.290587336 | 3.274959228  | 0.001516464 | -1.168845953 |
| RNA5SP30       | 0.352184022  | 0.140600531 | 3.27485868   | 0.001516944 | -1.169113053 |
| RP11-202G11.2  | 0.29441775   | 0.144710142 | 3.273670286  | 0.00152263  | -1.172269474 |
| HMOX1          | -1.092873796 | 4.978137128 | -3.273538905 | 0.00152326  | -1.172618375 |
| ZDHHC3         | -0.297472757 | 2.561210889 | -3.272890188 | 0.001526373 | -1.174340973 |
| PTGS1          | -0.531463052 | 1.774690457 | -3.272475658 | 0.001528365 | -1.175441577 |
| NHP2L1         | -0.406353662 | 4.956208644 | -3.271901747 | 0.001531128 | -1.176965173 |
| RP11-339B21.8  | 0.292928192  | 0.424593017 | 3.270032561  | 0.001540158 | -1.181926009 |
| RP11-369K16.1  | 0.37523882   | 0.385294299 | 3.268931092  | 0.001545502 | -1.184848307 |
| CTD-2534I21.9  | 0.346359745  | 0.140296322 | 3.26382234   | 0.001570519 | -1.198392506 |
| BABAM1         | -0.387040329 | 3.890028193 | -3.263549196 | 0.001571867 | -1.199116206 |
| EIF4EP3        | 0.216719227  | 0.119756364 | 3.261703809  | 0.001581003 | -1.204004377 |
| TMTC2          | 0.752062745  | 2.962462041 | 3.261452053  | 0.001582254 | -1.204671082 |
| CAMSAP2        | 0.425176419  | 3.022353933 | 3.259666036  | 0.00159115  | -1.209399708 |
| HOXB2          | 0.625440282  | 3.265474886 | 3.258846115  | 0.00159525  | -1.211569857 |
| FEZ1           | 0.633912288  | 1.516736219 | 3.25701368   | 0.001604449 | -1.216418401 |
| MYO1H          | 0.304689012  | 0.324084369 | 3.256858426  | 0.00160523  | -1.2168291   |
| OXCT1-AS1      | 0.297239385  | 0.439296071 | 3.256679505  | 0.001606132 | -1.217302391 |
| GLIS3          | 0.597883554  | 1.02259092  | 3.2552681    | 0.001613258 | -1.221035199 |
| SEPT7P3        | 0.258698018  | 0.28441337  | 3.254343252  | 0.001617943 | -1.223480519 |
| RP11-1028N23.4 | 0.288196189  | 0.115778267 | 3.25377406   | 0.001620833 | -1.224985214 |
| RP11-527L4.2   | 0.337467715  | 0.214291456 | 3.253460769  | 0.001622426 | -1.225813331 |
| P2RY6          | -0.442671695 | 0.854755339 | -3.253029773 | 0.001624619 | -1.226952478 |
| OR7E128P       | 0.277743929  | 0.471410374 | 3.25220744   | 0.001628812 | -1.229125633 |
| DDX19B         | -0.317165227 | 1.981159566 | -3.251300324 | 0.001633449 | -1.231522355 |
| RPL7P41        | 0.350386229  | 0.143629602 | 3.251225288  | 0.001633833 | -1.231720589 |

|                |              |             |              |             |              |
|----------------|--------------|-------------|--------------|-------------|--------------|
| CTD-2562G15.2  | 0.294027416  | 0.250122134 | 3.251174489  | 0.001634093 | -1.231854789 |
| RNU6-1116P     | 0.242189854  | 0.091498783 | 3.250970761  | 0.001635137 | -1.232392978 |
| RNU6-306P      | 0.524602081  | 0.300889387 | 3.250962984  | 0.001635177 | -1.232413524 |
| GGT8P          | 0.480907329  | 0.40225618  | 3.25040504   | 0.001638038 | -1.233887316 |
| RP11-30L15.4   | 0.290712166  | 0.344409093 | 3.248341214  | 0.001648661 | -1.239337177 |
| PPP1R2P3       | 0.254393315  | 0.527056202 | 3.24823643   | 0.001649202 | -1.239613806 |
| CLEC2B         | -0.681193598 | 2.033141922 | -3.247815134 | 0.001651379 | -1.240725954 |
| AC092309.1     | 0.449251887  | 0.215134202 | 3.24769026   | 0.001652025 | -1.241055577 |
| AC141586.5     | 0.350759961  | 1.320991704 | 3.247268795  | 0.001654207 | -1.242168026 |
| RNU6-116P      | 0.586946316  | 0.29374201  | 3.243993556  | 0.001671252 | -1.250809216 |
| RP11-621L6.2   | 0.257034484  | 0.217621061 | 3.241808562  | 0.001682715 | -1.256570267 |
| C7orf55-LUC7L2 | 0.365899761  | 2.962909542 | 3.240543045  | 0.001689388 | -1.25990563  |
| ZNF292         | 0.382943025  | 1.85115188  | 3.238822624  | 0.001698498 | -1.26443833  |
| NDUFA13        | -0.576889936 | 3.817996191 | -3.238015492 | 0.001702789 | -1.266564203 |
| KIAA0020       | 0.486612761  | 3.508447353 | 3.237548055  | 0.001705278 | -1.267795181 |
| RP5-1061H20.4  | 0.29512594   | 0.495025013 | 3.237207793  | 0.001707092 | -1.268691164 |
| BRPF3          | 0.465592398  | 2.892528277 | 3.236771368  | 0.001709421 | -1.26984026  |
| KNTC1          | 0.428842029  | 2.063195236 | 3.233901454  | 0.001724814 | -1.277393711 |
| LILRB1         | -0.452395801 | 1.142342235 | -3.233226495 | 0.001728453 | -1.27916942  |
| USP28          | 0.367903297  | 2.667613867 | 3.232362782  | 0.00173312  | -1.2814413   |
| PRKCD          | -0.473352284 | 2.799826872 | -3.232305153 | 0.001733432 | -1.281592866 |
| RP11-468N14.8  | 0.262916645  | 0.077679918 | 3.231517693  | 0.001737698 | -1.283663741 |
| RN7SL266P      | 0.201320466  | 0.071419959 | 3.231089579  | 0.001740021 | -1.284789437 |
| IFFO2          | 0.515415791  | 2.647062255 | 3.229584445  | 0.001748212 | -1.288746182 |
| RP11-184E9.1   | 0.327338795  | 0.23942378  | 3.228003263  | 0.001756857 | -1.292901324 |
| EEA1           | 0.387090051  | 1.926676288 | 3.227618235  | 0.001758967 | -1.293912893 |
| TLR8           | -0.248015627 | 0.413293728 | -3.225872767 | 0.001768567 | -1.298497531 |
| HNRNPUL2-BSCL2 | 0.432047661  | 1.012185388 | 3.22537912   | 0.001771291 | -1.299793796 |
| RP11-246E12.2  | 0.291628048  | 0.460403185 | 3.223706159  | 0.001780551 | -1.30418569  |
| LYPD1          | 0.670387833  | 1.380593026 | 3.223423613  | 0.001782119 | -1.304927265 |
| MST1R          | 0.405551767  | 0.389910012 | 3.222610705  | 0.001786638 | -1.307060555 |
| C1orf198       | 0.554372742  | 4.393535472 | 3.22179953   | 0.001791159 | -1.309188886 |
| KLHDC8B        | -0.42433827  | 2.981388212 | -3.221198039 | 0.001794518 | -1.31076679  |

|                 |              |             |              |             |              |
|-----------------|--------------|-------------|--------------|-------------|--------------|
| RP11-146F11.2   | 0.424328588  | 0.223236662 | 3.221139367  | 0.001794846 | -1.310920696 |
| RNU7-128P       | 0.613289635  | 0.347382974 | 3.219750395  | 0.001802626 | -1.314563502 |
| CEP295          | 0.320614652  | 1.067670984 | 3.217312922  | 0.001816356 | -1.320953267 |
| AC018892.3      | 0.221785032  | 0.08146312  | 3.216067585  | 0.001823408 | -1.324216449 |
| FNDC3B          | 0.380821037  | 3.731176502 | 3.214559484  | 0.001831983 | -1.328166858 |
| MIR1273A        | 0.404281864  | 0.200347422 | 3.214513429  | 0.001832246 | -1.328287475 |
| RNA5SP503       | 0.364656436  | 0.114618667 | 3.214273701  | 0.001833612 | -1.328915296 |
| ZNF543          | 0.346108342  | 1.722616426 | 3.214116169  | 0.001834511 | -1.329327833 |
| RP11-473N11.2   | 0.209993904  | 0.601033227 | 3.214066169  | 0.001834796 | -1.329458768 |
| RP11-567B20.1   | 0.435089334  | 0.146367955 | 3.213786817  | 0.001836391 | -1.330190279 |
| AC092069.1      | 0.222174951  | 0.124438162 | 3.213617228  | 0.00183736  | -1.330634338 |
| SP2-AS1         | 0.246016876  | 0.808804103 | 3.212729858  | 0.001842437 | -1.332957583 |
| HSPE1P16        | 0.273038879  | 0.106759238 | 3.212617685  | 0.001843079 | -1.333251231 |
| PCF11           | 0.338614999  | 2.25331423  | 3.211565903  | 0.001849116 | -1.336004211 |
| A4GNT           | 0.204232336  | 0.134300237 | 3.211414937  | 0.001849984 | -1.336399302 |
| snoMe28S-Am2634 | 0.37826613   | 0.33982248  | 3.211028522  | 0.001852207 | -1.33741051  |
| RP11-1023L17.1  | 0.22057109   | 0.432797155 | 3.210744936  | 0.00185384  | -1.338152567 |
| NPTN-IT1        | 0.291450324  | 0.566614116 | 3.210174344  | 0.001857131 | -1.339645479 |
| IQGAP3          | 0.535899764  | 2.599520088 | 3.210006065  | 0.001858102 | -1.340085729 |
| AOAH            | -0.672411681 | 1.430126276 | -3.209254295 | 0.001862448 | -1.342052288 |
| PCNT            | 0.425654191  | 2.449918107 | 3.208032146  | 0.001869533 | -1.345248559 |
| RP13-297E16.5   | 0.227273004  | 0.170833934 | 3.207785131  | 0.001870968 | -1.345894461 |
| BARD1           | 0.473438395  | 1.737194052 | 3.207740432  | 0.001871227 | -1.346011336 |
| AC096753.1      | 0.307494281  | 0.104719691 | 3.206062023  | 0.001881006 | -1.35039903  |
| RASAL2          | 0.374054566  | 2.16585956  | 3.20559238   | 0.001883751 | -1.351626454 |
| RP3-463P15.1    | 0.210725222  | 0.076683062 | 3.205069052  | 0.001886814 | -1.35299402  |
| RNU6-1137P      | 0.260288001  | 0.111646114 | 3.203287278  | 0.001897278 | -1.357648889 |
| RP11-804F13.1   | 0.228985229  | 0.082334263 | 3.20326925   | 0.001897384 | -1.357695977 |
| HLA-DRB6        | -0.893592203 | 2.029879215 | -3.202993455 | 0.001899009 | -1.358416308 |
| TTLL1           | -0.430588964 | 2.326469969 | -3.202721744 | 0.001900611 | -1.359125926 |
| PIK3IP1         | -0.46950774  | 1.789157402 | -3.202202228 | 0.001903677 | -1.360482597 |
| IPPK            | 0.244129706  | 1.039975531 | 3.202015878  | 0.001904778 | -1.360969194 |
| RP11-411H5.1    | 0.349024657  | 0.126278132 | 3.200465995  | 0.001913957 | -1.365015395 |

|                |              |             |              |             |              |
|----------------|--------------|-------------|--------------|-------------|--------------|
| CTD-2616J11.10 | 0.272247465  | 0.403522209 | 3.19864024   | 0.001924824 | -1.36977987  |
| C7orf66        | 0.407447668  | 0.213950374 | 3.195712124  | 0.001942372 | -1.377416686 |
| AC007787.3     | 0.405295871  | 0.435815269 | 3.195503004  | 0.001943631 | -1.377961887 |
| MGAT2          | 0.441270785  | 1.779845171 | 3.193398472  | 0.001956343 | -1.383447112 |
| GOLPH3         | 0.448398816  | 5.470905579 | 3.192439358  | 0.001962163 | -1.385946012 |
| AL391001.1     | 0.306737094  | 0.233113781 | 3.191990133  | 0.001964894 | -1.387116237 |
| TMCO2          | 0.254268606  | 0.118686243 | 3.189195783  | 0.001981962 | -1.394392622 |
| ENPP7P4        | 0.384558041  | 0.346170905 | 3.188656348  | 0.001985273 | -1.395796726 |
| RP11-546M21.6  | 0.225969809  | 0.232072665 | 3.188406453  | 0.001986808 | -1.396447119 |
| TMC8           | -0.412924446 | 1.016271154 | -3.188178311 | 0.001988211 | -1.397040862 |
| POU5F1P6       | 0.290103796  | 0.372115858 | 3.18557605   | 0.002004278 | -1.403810974 |
| RNU6-264P      | 0.281877237  | 0.122795974 | 3.185105803  | 0.002007194 | -1.405033923 |
| PRRC2B         | 0.537432699  | 3.770755172 | 3.184520246  | 0.002010831 | -1.406556564 |
| RNU7-50P       | 0.667085916  | 0.300821308 | 3.184096812  | 0.002013465 | -1.407657496 |
| RP11-312J18.7  | 0.32430918   | 0.15900372  | 3.183963979  | 0.002014292 | -1.408002841 |
| CD3E           | -0.646387547 | 0.900356901 | -3.183886422 | 0.002014775 | -1.408204469 |
| FGD2           | -0.284833046 | 0.601146454 | -3.182684531 | 0.002022273 | -1.411328624 |
| OCLM           | 0.345752787  | 0.615916105 | 3.182646089  | 0.002022513 | -1.411428533 |
| NPL            | -0.488437719 | 2.011926969 | -3.182113861 | 0.002025842 | -1.412811685 |
| CIDECP         | -0.332141265 | 1.802345365 | -3.181928335 | 0.002027003 | -1.413293787 |
| DPPA2          | 0.225926213  | 0.099931221 | 3.181373977  | 0.002030478 | -1.414734195 |
| ATP5G1P7       | 0.321812507  | 0.2359788   | 3.181065933  | 0.002032411 | -1.415534513 |
| CLIC4P1        | 0.316495795  | 0.578649355 | 3.181025628  | 0.002032664 | -1.415639223 |
| SNX4           | 0.44982339   | 3.895419423 | 3.179936434  | 0.002039514 | -1.41846851  |
| PHC3           | 0.322926884  | 1.649342255 | 3.179646679  | 0.00204134  | -1.419221053 |
| PLEKHO2        | -0.467410724 | 3.936241306 | -3.176190802 | 0.002063236 | -1.428192447 |
| LFNG           | -0.745033911 | 3.855460368 | -3.176157744 | 0.002063446 | -1.428278231 |
| PPFIA1         | 0.335320853  | 2.525879578 | 3.174710843  | 0.002072679 | -1.432032093 |
| AL359753.1     | 0.333283673  | 0.23087933  | 3.174620855  | 0.002073255 | -1.432265514 |
| NAA16          | 0.353272558  | 1.48555133  | 3.173928522  | 0.002077687 | -1.434061206 |
| RPL36P2        | 0.250945433  | 0.244113917 | 3.173823938  | 0.002078358 | -1.434332438 |
| KATNAL2        | 0.343686982  | 0.85876502  | 3.173810322  | 0.002078445 | -1.434367751 |
| PSMB10         | -0.571361883 | 3.117635809 | -3.172547217 | 0.002086558 | -1.437642972 |

|               |              |             |              |             |              |
|---------------|--------------|-------------|--------------|-------------|--------------|
| RP11-619L19.2 | 0.465463827  | 0.198093091 | 3.170282666  | 0.002101176 | -1.443512409 |
| RP11-571E6.3  | 0.246097241  | 0.096150947 | 3.164993095  | 0.002135696 | -1.457209705 |
| AC093388.3    | 0.396854769  | 0.876887736 | 3.163998644  | 0.002142244 | -1.45978285  |
| HTR1D         | 0.32062171   | 0.229341169 | 3.163771003  | 0.002143746 | -1.460371784 |
| CYCSP35       | 0.398281765  | 0.143168132 | 3.161509744  | 0.002158716 | -1.466220144 |
| AL160165.1    | 0.501994514  | 0.687493881 | 3.161205933  | 0.002160735 | -1.467005653 |
| RNU2-32P      | 0.391485156  | 0.159358379 | 3.1606324    | 0.002164551 | -1.468488373 |
| AC007191.4    | 0.322288572  | 0.753801503 | 3.15944219   | 0.002172489 | -1.471564687 |
| TPM3P2        | 0.334064891  | 0.16045074  | 3.159359926  | 0.002173039 | -1.471777279 |
| RP5-1182A14.5 | 0.217816518  | 0.206399557 | 3.158979698  | 0.002175581 | -1.47275984  |
| KDM4C         | 0.249707626  | 1.094151252 | 3.158343293  | 0.002179843 | -1.47440419  |
| RP11-410K21.2 | 0.38679802   | 0.179957977 | 3.158058372  | 0.002181753 | -1.475140288 |
| RP11-700F16.2 | 0.248169086  | 0.187168429 | 3.157803151  | 0.002183466 | -1.475799611 |
| RP11-867G23.3 | 0.238286675  | 0.531239542 | 3.157634204  | 0.0021846   | -1.476236038 |
| C5orf51       | 0.441989126  | 3.164800345 | 3.156987492  | 0.002188947 | -1.477906464 |
| CREBZF        | 0.572899506  | 3.09483384  | 3.156528863  | 0.002192035 | -1.479090922 |
| SMC4          | 0.551179301  | 3.524371066 | 3.156493008  | 0.002192277 | -1.479183516 |
| CTD-2318O12.1 | 0.517298697  | 0.696680242 | 3.156069703  | 0.002195131 | -1.480276616 |
| RCSD1         | -0.44273153  | 1.293166664 | -3.153464282 | 0.002212773 | -1.487002096 |
| SARS          | -0.364814984 | 5.331588486 | -3.152258394 | 0.002220983 | -1.490113447 |
| AL121932.1    | 0.604111841  | 0.310090771 | 3.15018526   | 0.002235165 | -1.49546025  |
| COX7BP2       | 0.384294759  | 0.396396264 | 3.149533867  | 0.002239638 | -1.497139689 |
| FCGRT         | -0.537207879 | 4.903754685 | -3.147007683 | 0.002257065 | -1.503650216 |
| AC009095.4    | 0.275860584  | 0.594454598 | 3.146265377  | 0.002262209 | -1.505562531 |
| RP11-641J8.1  | 0.380355126  | 0.48207404  | 3.146110968  | 0.002263281 | -1.505960274 |
| AC011453.4    | 0.380601748  | 0.133256162 | 3.14510142   | 0.002270299 | -1.508560389 |
| MIR4257       | 0.205228487  | 0.117191445 | 3.142411608  | 0.002289095 | -1.515484906 |
| LPAR6         | -0.57821891  | 2.613748588 | -3.141767421 | 0.002293618 | -1.517142585 |
| LINC01509     | 0.303317491  | 0.277860679 | 3.141678478  | 0.002294243 | -1.517371441 |
| CTD-2587H24.1 | 0.232112774  | 0.1683091   | 3.139750204  | 0.002307836 | -1.522331762 |
| CTD-2378E12.1 | 0.232642132  | 0.189393571 | 3.139422603  | 0.002310152 | -1.523174251 |
| RNF141        | -0.270474225 | 1.866385631 | -3.139013831 | 0.002313046 | -1.524225394 |
| CCR5          | -0.473347893 | 0.864290066 | -3.138659236 | 0.002315559 | -1.525137135 |

|                  |              |             |              |             |              |
|------------------|--------------|-------------|--------------|-------------|--------------|
| IRF5             | -0.40278357  | 1.180241292 | -3.137849963 | 0.002321304 | -1.527217654 |
| AL354828.1       | 0.230086122  | 0.087231455 | 3.136482609  | 0.00233104  | -1.530731967 |
| CHCHD2P1         | 0.266091819  | 0.12804078  | 3.13583805   | 0.002335643 | -1.532388172 |
| RP11-274M17.1    | 0.218580512  | 0.134731094 | 3.135122702  | 0.002340762 | -1.534225958 |
| MIR5688          | 0.580232949  | 0.220931059 | 3.135112379  | 0.002340835 | -1.534252478 |
| KRR1P1           | 0.216635621  | 0.376180385 | 3.134819935  | 0.002342931 | -1.535003693 |
| AC019070.1       | 0.251270262  | 0.126233406 | 3.134228567  | 0.002347174 | -1.536522608 |
| DAND5            | 0.240317484  | 0.198990148 | 3.13271302   | 0.00235808  | -1.540414231 |
| RP11-255B23.1    | 0.259571701  | 0.764415413 | 3.132604621  | 0.002358862 | -1.540692524 |
| EIF4A1P11        | 0.27964537   | 0.270862951 | 3.132092779  | 0.002362557 | -1.542006466 |
| CDK12            | 0.299198824  | 2.191973595 | 3.131807159  | 0.002364621 | -1.542739605 |
| DFNA5            | -0.415109949 | 1.540946637 | -3.13076891  | 0.002372139 | -1.545404178 |
| NLRP9            | 0.216470364  | 0.088162502 | 3.130172959  | 0.002376464 | -1.546933322 |
| LL0XNC01-237H1.2 | 0.307106687  | 0.732092643 | 3.12994398   | 0.002378128 | -1.547520796 |
| RP11-16L9.1      | 0.313748471  | 0.388811569 | 3.129580457  | 0.002380772 | -1.548453391 |
| C9orf129         | 0.275393082  | 0.357124746 | 3.129430174  | 0.002381866 | -1.548838907 |
| MKLN1            | 0.299174024  | 2.034148083 | 3.128253883  | 0.002390443 | -1.551855917 |
| RP1-7G5.5        | 0.230187604  | 0.280228495 | 3.127449926  | 0.002396321 | -1.553917437 |
| RP11-218E20.5    | 0.299266036  | 0.412696051 | 3.127024934  | 0.002399434 | -1.555007045 |
| RP11-423F24.3    | 0.218232118  | 0.334036169 | 3.126829669  | 0.002400866 | -1.55550763  |
| LINC00630        | 0.23320979   | 0.585674862 | 3.126341767  | 0.002404446 | -1.556758325 |
| DNMT1            | 0.39472368   | 3.763716088 | 3.126205988  | 0.002405444 | -1.557106353 |
| HNRNPA1P57       | 0.264660951  | 0.219407567 | 3.125397589  | 0.002411389 | -1.559178207 |
| ASS1P12          | 0.239795334  | 0.419634395 | 3.123777931  | 0.002423343 | -1.563327989 |
| SLAMF8           | -0.677359751 | 1.831128357 | -3.123560721 | 0.00242495  | -1.563884383 |
| RNU1-8P          | 0.313686605  | 0.162784829 | 3.123104851  | 0.002428327 | -1.565052016 |
| BHLHA15          | 0.480052388  | 0.58610563  | 3.122725725  | 0.002431138 | -1.566022983 |
| RP4-724E16.2     | 0.292649276  | 0.508407572 | 3.121572691  | 0.002439707 | -1.568975413 |
| RP11-519G16.2    | 0.277983534  | 0.257698087 | 3.121507187  | 0.002440195 | -1.569143117 |
| ATP13A3          | 0.422694367  | 3.219470127 | 3.121337828  | 0.002441456 | -1.569576695 |
| MBNL1            | 0.334703259  | 3.584103382 | 3.119456569  | 0.002455506 | -1.574391696 |
| BST2             | -1.060195743 | 4.989602987 | -3.11894447  | 0.002459344 | -1.575701998 |
| LINC00266-1      | 0.215663019  | 0.093926164 | 3.118779675  | 0.00246058  | -1.576123622 |

|               |              |             |              |             |              |
|---------------|--------------|-------------|--------------|-------------|--------------|
| SCIMP         | -0.269104203 | 0.60343519  | -3.116689348 | 0.002476311 | -1.581470162 |
| LINC00886     | 0.202371983  | 0.375817169 | 3.116680609  | 0.002476377 | -1.581492509 |
| RNU6-319P     | 0.391250688  | 0.26756623  | 3.116586554  | 0.002477087 | -1.581733012 |
| SENP2         | 0.357721418  | 2.53300679  | 3.1155398    | 0.002485001 | -1.58440923  |
| ARHGEF3       | -0.4005125   | 1.615419155 | -3.114962218 | 0.002489379 | -1.585885626 |
| RN7SKP3       | 0.292706751  | 0.125059904 | 3.113008013  | 0.002504242 | -1.590879311 |
| HOXB3         | 0.428062539  | 1.704317064 | 3.112631298  | 0.002507117 | -1.591841669 |
| FAM174A       | -0.324048019 | 3.066156074 | -3.111650713 | 0.002514614 | -1.594346252 |
| IP6K2         | -0.326593339 | 3.046597729 | -3.111318076 | 0.002517162 | -1.595195724 |
| RPL7P61       | 0.296782263  | 0.212708961 | 3.110736235  | 0.002521624 | -1.596681432 |
| RP11-639B1.1  | 0.329871561  | 0.207281269 | 3.110564498  | 0.002522943 | -1.597119913 |
| KRT19P2       | 0.209359588  | 0.238148431 | 3.110564365  | 0.002522944 | -1.597120254 |
| CTD-2382H12.2 | 0.400703841  | 0.162214138 | 3.109233758  | 0.002533182 | -1.600516943 |
| RP11-708L7.6  | 0.313747006  | 0.205663891 | 3.10874038   | 0.002536988 | -1.601776116 |
| LOX           | 0.736867443  | 5.695223922 | 3.108528732  | 0.002538623 | -1.602316226 |
| RNASE6        | -0.861434762 | 3.581205817 | -3.107556191 | 0.002546145 | -1.604797709 |
| AC009299.4    | 0.237848866  | 0.131457519 | 3.107119658  | 0.002549528 | -1.605911346 |
| SIRPA         | -0.559808403 | 3.126879885 | -3.106852563 | 0.002551601 | -1.606592672 |
| RP11-277J6.2  | 0.22814701   | 0.18403068  | 3.104956231  | 0.002566358 | -1.611428648 |
| HK3           | -0.464361451 | 1.178068399 | -3.104542835 | 0.002569585 | -1.612482575 |
| ATAD2         | 0.672111374  | 3.449031013 | 3.104262794  | 0.002571774 | -1.613196459 |
| CTC-435M10.10 | 0.296041893  | 0.160790735 | 3.103793746  | 0.002575443 | -1.614392047 |
| NAGK          | -0.371401722 | 3.257222217 | -3.103663731 | 0.002576461 | -1.614723427 |
| WDR66         | 0.258863879  | 0.325146477 | 3.103499668  | 0.002577746 | -1.615141573 |
| RP11-80F22.4  | 0.353923001  | 0.125433793 | 3.102927277  | 0.002582235 | -1.616600281 |
| RP11-247I13.6 | 0.480339025  | 0.306629255 | 3.100930676  | 0.002597947 | -1.621686869 |
| FAM32A        | -0.318036319 | 4.832029221 | -3.100886737 | 0.002598294 | -1.621798779 |
| SRP19         | -0.326762095 | 2.372087405 | -3.100571607 | 0.002600783 | -1.62260137  |
| RP11-535M15.2 | 0.358807948  | 0.886144784 | 3.098792987  | 0.002614869 | -1.627130056 |
| AL357075.1    | 0.376019058  | 0.461758148 | 3.097684813  | 0.002623682 | -1.629950638 |
| AC083899.1    | 0.302408912  | 0.109770594 | 3.097136091  | 0.002628056 | -1.631346983 |
| CTC-453G23.4  | 0.275608159  | 0.220253466 | 3.095798852  | 0.002638743 | -1.63474907  |
| CEACAM20      | 0.224189127  | 0.089506268 | 3.095553326  | 0.00264071  | -1.635373593 |



|               |              |             |              |             |              |
|---------------|--------------|-------------|--------------|-------------|--------------|
| EGFLAM-AS2    | 0.243581365  | 0.128677207 | 3.094641633  | 0.002648024 | -1.63769224  |
| LYPLA1P3      | 0.213092899  | 0.519543493 | 3.094474263  | 0.002649369 | -1.638117842 |
| DPH5          | -0.361338105 | 3.102246266 | -3.094221096 | 0.002651405 | -1.638761583 |
| RNU6-1133P    | 0.381424668  | 0.172125113 | 3.094135524  | 0.002652093 | -1.638979161 |
| SRGAP2B       | 0.292523536  | 1.219546269 | 3.093924271  | 0.002653793 | -1.639516282 |
| RP11-791G16.5 | 0.236969419  | 0.099365634 | 3.093502319  | 0.002657192 | -1.640589029 |
| PDE1B         | -0.317257862 | 0.545495287 | -3.09333969  | 0.002658502 | -1.641002458 |
| AC004461.4    | 0.390634818  | 0.419755149 | 3.091946166  | 0.002669761 | -1.644544313 |
| SCO2          | -0.425919156 | 3.369951735 | -3.090622755 | 0.002680493 | -1.64790681  |
| KRT8P51       | 0.281713265  | 0.140526504 | 3.090472778  | 0.002681712 | -1.648287797 |
| RP5-849L7.1   | 0.263320788  | 0.181973936 | 3.088906206  | 0.002694474 | -1.652266503 |
| DGKD          | 0.303082186  | 2.10423019  | 3.088715908  | 0.002696028 | -1.652749704 |
| RNU2-47P      | 0.255139181  | 0.094322021 | 3.088554464  | 0.002697347 | -1.653159622 |
| TMPRSS9       | 0.537934236  | 0.774377087 | 3.088403899  | 0.002698578 | -1.653541904 |
| AC068724.2    | 0.239362362  | 0.105524242 | 3.088403561  | 0.00269858  | -1.653542762 |
| RP11-565A3.2  | 0.255580993  | 0.162599254 | 3.088091894  | 0.002701113 | -1.654334029 |
| RP11-116B19.2 | 0.448603892  | 0.238093738 | 3.087863082  | 0.002703003 | -1.654914902 |
| KLHL20        | 0.444195749  | 3.008459479 | 3.086741887  | 0.002712198 | -1.657760737 |
| AC009973.1    | 0.581495578  | 0.259356918 | 3.086272438  | 0.002716057 | -1.658952059 |
| FOCAD-AS1     | 0.399156337  | 0.344286241 | 3.086206121  | 0.002716602 | -1.659120339 |
| RNF169        | 0.315831912  | 1.408594058 | 3.085258407  | 0.002724409 | -1.661524883 |
| CTD-2301A4.3  | 0.234124747  | 0.274712846 | 3.085063109  | 0.00272602  | -1.662020321 |
| HMHB1         | 0.396428362  | 0.243506828 | 3.084946448  | 0.002726983 | -1.66231626  |
| TLR1          | -0.351292159 | 0.993498493 | -3.08402007  | 0.002734641 | -1.664665924 |
| CTA-221G9.11  | 0.251802256  | 0.101416755 | 3.083906895  | 0.002735578 | -1.664952943 |
| UNKL          | 0.305393503  | 1.325361663 | 3.082710877  | 0.002745498 | -1.667985614 |
| FPR1          | -0.554879707 | 1.138499562 | -3.082387788 | 0.002748183 | -1.668804694 |
| COX6B1        | -0.465851274 | 6.954798812 | -3.081380218 | 0.002756574 | -1.671358603 |
| MIR92B        | 0.357593663  | 0.43646732  | 3.0809971    | 0.00275977  | -1.672329529 |
| RP3-460G2.2   | -0.839385742 | 1.7561028   | -3.080950224 | 0.002760162 | -1.672448319 |
| TWF2          | -0.394475204 | 4.56762976  | -3.080945606 | 0.0027602   | -1.672460022 |
| ANKRD40       | 0.31323386   | 3.444400554 | 3.080906848  | 0.002760524 | -1.672558238 |
| RP11-472N13.3 | -0.31166013  | 0.571041053 | -3.07955202  | 0.002771858 | -1.675990906 |

|               |              |             |              |             |              |
|---------------|--------------|-------------|--------------|-------------|--------------|
| CECR1         | -0.660888924 | 1.917361579 | -3.078373556 | 0.002781753 | -1.678975761 |
| MTCO2P4       | 0.317864533  | 0.149252618 | 3.07777307   | 0.002786807 | -1.680496351 |
| C6orf99       | 0.400112887  | 0.572091784 | 3.07717712   | 0.002791831 | -1.682005221 |
| CTD-2201E9.4  | 0.290414169  | 0.235929666 | 3.07679199   | 0.002795083 | -1.682980201 |
| AP000889.2    | 0.261067593  | 0.095795761 | 3.076217513  | 0.00279994  | -1.684434345 |
| RP11-124N2.1  | 0.202605968  | 0.380173648 | 3.075544409  | 0.00280564  | -1.686137869 |
| MPHOSPH9      | 0.331034591  | 1.762461012 | 3.075379862  | 0.002807035 | -1.686554267 |
| RNU6-396P     | 0.323057503  | 0.25058734  | 3.075376614  | 0.002807063 | -1.686562487 |
| VN1R7P        | 0.277614328  | 0.122051966 | 3.074918386  | 0.002810951 | -1.687721974 |
| VENTX         | -0.253283184 | 0.436322757 | -3.074368777 | 0.002815622 | -1.68911251  |
| RP11-272P10.2 | 0.379544065  | 0.259985637 | 3.074356993  | 0.002815722 | -1.689142322 |
| ARL11         | -0.310106412 | 0.730737477 | -3.074259299 | 0.002816553 | -1.689389471 |
| MSRB2         | -0.369659279 | 3.224389746 | -3.072926057 | 0.002827917 | -1.692761732 |
| TSHZ3         | -0.625741221 | 1.692068511 | -3.071137052 | 0.002843232 | -1.697284977 |
| AP1B1         | -0.378723224 | 4.049664318 | -3.070672761 | 0.00284722  | -1.698458534 |
| RN7SKP30      | 0.356289736  | 0.416259367 | 3.07039269   | 0.002849627 | -1.699166382 |
| WASF3-AS1     | 0.20268515   | 0.080338553 | 3.069807965  | 0.00285466  | -1.700644045 |
| ALG1L11P      | 0.233210932  | 0.238573583 | 3.069307513  | 0.002858974 | -1.701908568 |
| SLC25A25      | 0.40372067   | 2.046912679 | 3.069103666  | 0.002860733 | -1.702423592 |
| FOXN3P1       | 0.203477599  | 0.14794548  | 3.067975204  | 0.002870489 | -1.705274201 |
| RNF181        | -0.457913969 | 5.348348829 | -3.065912535 | 0.002888401 | -1.710482576 |
| RP11-274H24.1 | 0.209564174  | 0.250026042 | 3.065238232  | 0.002894279 | -1.712184641 |
| BOLA3-AS1     | 0.491086512  | 1.69509565  | 3.064908596  | 0.002897156 | -1.713016595 |
| RP11-50B3.4   | 0.205239643  | 0.313906539 | 3.064839398  | 0.002897761 | -1.713191231 |
| ARL2BPP1      | 0.229135132  | 0.085394405 | 3.063636739  | 0.002908284 | -1.716225918 |
| RP11-697H9.3  | 0.248489923  | 0.126135949 | 3.063221316  | 0.002911927 | -1.717273942 |
| CASP1P2       | 0.235750416  | 0.126941874 | 3.062000218  | 0.00292266  | -1.720353871 |
| SVILP1        | 0.249091193  | 0.456059028 | 3.061964679  | 0.002922973 | -1.720443495 |
| RP4-741O10.1  | 0.261972906  | 0.252671511 | 3.061279237  | 0.002929014 | -1.722171919 |
| GACAT2        | 0.270914467  | 0.207700267 | 3.061241231  | 0.002929349 | -1.722267747 |
| TET2-AS1      | 0.312295364  | 0.289206485 | 3.060193844  | 0.002938604 | -1.724908244 |
| TRAPPC3       | -0.309609995 | 4.143833256 | -3.05989131  | 0.002941283 | -1.725670811 |
| RP11-409C19.2 | 0.230839178  | 0.316119024 | 3.059150909  | 0.002947847 | -1.727536812 |

|               |              |             |              |             |              |
|---------------|--------------|-------------|--------------|-------------|--------------|
| CCNH          | -0.312234577 | 2.126811524 | -3.058801821 | 0.002950947 | -1.728416481 |
| OSTN-AS1      | 0.210599224  | 0.12503659  | 3.058709751  | 0.002951765 | -1.728648474 |
| RP11-774D14.1 | 0.300823358  | 0.184189625 | 3.057674673  | 0.002960976 | -1.731256245 |
| IL1RL2        | 0.485856202  | 1.079566854 | 3.056492004  | 0.002971533 | -1.734235006 |
| YARS2         | -0.409256827 | 3.025772021 | -3.056197266 | 0.00297417  | -1.734977215 |
| AC007237.2    | 0.29347992   | 0.248306843 | 3.05570835   | 0.002978548 | -1.736208277 |
| NRROS         | -0.476245641 | 1.760137647 | -3.054617768 | 0.002988335 | -1.738953741 |
| FUCA1         | -0.541160587 | 3.762757036 | -3.054053512 | 0.002993411 | -1.740373913 |
| SIGLEC10      | -0.36240889  | 0.79189815  | -3.053734813 | 0.002996281 | -1.741175954 |
| MTMR2         | 0.387982193  | 3.489878022 | 3.053589635  | 0.002997589 | -1.741541287 |
| BRAF          | 0.275030057  | 1.848293771 | 3.053056613  | 0.003002398 | -1.742882496 |
| OXCT2P1       | 0.238628012  | 0.471936163 | 3.052350123  | 0.003008782 | -1.744659907 |
| TMED8         | 0.362192263  | 2.483283955 | 3.051729028  | 0.003014405 | -1.746222211 |
| TXNDC5        | 0.567040333  | 2.562549045 | 3.051670732  | 0.003014933 | -1.746368836 |
| AC007389.1    | 0.326172356  | 0.198223273 | 3.051418948  | 0.003017215 | -1.747002093 |
| GOLGA2P8      | 0.201745686  | 0.245839023 | 3.050216665  | 0.003028137 | -1.750025364 |
| RP11-29B9.2   | 0.281037084  | 0.145481654 | 3.050179849  | 0.003028472 | -1.750117927 |
| TMEM168       | 0.306972192  | 2.281376919 | 3.049323222  | 0.003036277 | -1.752271415 |
| PSMD10P3      | 0.211029002  | 0.180954346 | 3.048514971  | 0.003043658 | -1.754302852 |
| RP11-662B19.2 | 0.209501999  | 0.226631876 | 3.048277101  | 0.003045833 | -1.754900628 |
| HERC2P10      | 0.225124615  | 0.611814685 | 3.048012646  | 0.003048254 | -1.755565168 |
| LMBRD2        | 0.336554553  | 1.717353717 | 3.047704714  | 0.003051074 | -1.756338905 |
| C11orf85      | 0.240661419  | 0.179132953 | 3.047386262  | 0.003053993 | -1.75713901  |
| TMEM136       | 0.393523743  | 1.678895852 | 3.046109034  | 0.003065728 | -1.760347358 |
| NUP210L       | 0.264346078  | 0.209281378 | 3.04560516   | 0.003070369 | -1.761612779 |
| NRBP1         | -0.292561361 | 4.757346659 | -3.044851211 | 0.003077325 | -1.763505925 |
| SERPINI2      | 0.227306689  | 0.154048062 | 3.044822999  | 0.003077586 | -1.763576756 |
| RNU6-336P     | 0.294896745  | 0.162843837 | 3.044599664  | 0.003079649 | -1.764137471 |
| BRI3          | -0.382375756 | 3.458366815 | -3.043941708 | 0.003085736 | -1.765789171 |
| AC012363.1    | 0.440651421  | 0.226331563 | 3.043299874  | 0.003091685 | -1.767400128 |
| RP11-350E12.4 | 0.444269922  | 0.244192306 | 3.04313049   | 0.003093256 | -1.767825224 |
| BAIAP2L2      | 0.788375389  | 1.742654893 | 3.043062319  | 0.003093889 | -1.767996306 |
| RP11-115M14.1 | 0.30218603   | 0.123236518 | 3.042426615  | 0.003099795 | -1.769591515 |

|                 |              |             |              |             |              |
|-----------------|--------------|-------------|--------------|-------------|--------------|
| TXN2            | -0.43071175  | 4.93202532  | -3.041468192 | 0.003108719 | -1.771996042 |
| EPHX3           | 0.262082347  | 0.471698337 | 3.041422776  | 0.003109143 | -1.77210997  |
| SRPK1           | 0.491905736  | 3.23031986  | 3.041269918  | 0.003110568 | -1.772493405 |
| LINC00471       | 0.336174603  | 0.635669304 | 3.040031636  | 0.00312214  | -1.775599009 |
| FKTN            | 0.312362087  | 2.073270423 | 3.039689605  | 0.003125343 | -1.776456646 |
| RNU6-1151P      | 0.495504047  | 0.194315205 | 3.039361221  | 0.003128421 | -1.777279991 |
| AC024937.2      | 0.297858077  | 0.334220853 | 3.037941153  | 0.003141766 | -1.780839662 |
| KIAA1456        | 0.352129027  | 0.523012912 | 3.03763386   | 0.00314466  | -1.781609778 |
| MUS81           | 0.33860694   | 2.503882254 | 3.037317681  | 0.003147641 | -1.782402099 |
| KMT2C           | 0.369352979  | 2.073688512 | 3.03728436   | 0.003147955 | -1.782485596 |
| EFTUD1P1        | 0.255537613  | 0.181753885 | 3.037154054  | 0.003149185 | -1.782812112 |
| FYB             | -0.607892316 | 1.628634914 | -3.037113703 | 0.003149566 | -1.782913219 |
| RNA5SP72        | 0.399978908  | 0.164114564 | 3.036626404  | 0.003154167 | -1.784134161 |
| CTD-3022G6.1    | 0.250148121  | 0.101296065 | 3.036295447  | 0.003157296 | -1.784963295 |
| RP11-92G12.3    | 0.391058577  | 0.475423813 | 3.036060458  | 0.00315952  | -1.785551963 |
| SAT1            | -0.54819153  | 5.688555799 | -3.036004832 | 0.003160046 | -1.785691305 |
| GAL3ST4         | -0.506453689 | 2.938237947 | -3.035695514 | 0.003162976 | -1.786466104 |
| TMEM179         | 0.902332187  | 1.311638735 | 3.034158734  | 0.003177567 | -1.790314609 |
| RP11-945F5.1    | 0.449490545  | 0.218110878 | 3.033584614  | 0.003183034 | -1.79175196  |
| PSKH2           | 0.211482756  | 0.112907587 | 3.033356111  | 0.003185212 | -1.792323977 |
| RP11-430B1.1    | 0.610727704  | 0.887287186 | 3.031996369  | 0.003198203 | -1.795727131 |
| RP4-597A16.3    | 0.324339159  | 0.144567743 | 3.0316717    | 0.003201313 | -1.796539534 |
| ATP9B           | 0.25105946   | 1.236177041 | 3.031374947  | 0.003204157 | -1.797282024 |
| FAM83D          | 0.520073002  | 3.42154197  | 3.031039733  | 0.003207373 | -1.798120674 |
| POLQ            | 0.290416871  | 1.033427065 | 3.030877191  | 0.003208933 | -1.798527301 |
| TFAP2D          | 0.28001211   | 0.123756842 | 3.030780477  | 0.003209862 | -1.79876924  |
| PLTP            | -0.748143097 | 5.600204859 | -3.030481749 | 0.003212732 | -1.799516497 |
| RMI1            | 0.357685217  | 2.423489444 | 3.028595827  | 0.003230908 | -1.804232713 |
| POLR3GP2        | 0.313290495  | 0.163690495 | 3.027637631  | 0.003240179 | -1.806628029 |
| XRCC6P1         | 0.230394491  | 0.362006254 | 3.027280373  | 0.003243642 | -1.807520957 |
| XXbac-BPG34I8.3 | 0.240726227  | 0.093905969 | 3.027063888  | 0.003245743 | -1.808061997 |
| RP11-496H15.2   | 0.351965378  | 0.26253154  | 3.026657464  | 0.003249689 | -1.809077648 |
| EPB41L3         | -0.592194899 | 1.602758162 | -3.025877408 | 0.003257275 | -1.811026705 |

|               |              |             |              |             |              |
|---------------|--------------|-------------|--------------|-------------|--------------|
| NRBF2P5       | 0.225837653  | 0.448089959 | 3.025779399  | 0.003258229 | -1.811271564 |
| COX4I1P1      | 0.322678619  | 0.35793271  | 3.025554428  | 0.003260421 | -1.811833592 |
| PKD1P6        | 0.401753276  | 1.386353386 | 3.025516652  | 0.003260789 | -1.81192796  |
| CHML          | 0.675421517  | 2.059227452 | 3.024766392  | 0.003268109 | -1.813802016 |
| RP1-223H12.5  | 0.537472257  | 0.235545525 | 3.024178445  | 0.003273855 | -1.815270378 |
| RP11-367E12.4 | 0.412100099  | 1.111216892 | 3.023323251  | 0.00328223  | -1.81740577  |
| KIAA1033      | 0.305718497  | 2.699303415 | 3.023233113  | 0.003283114 | -1.817630812 |
| GON4L         | 0.30290777   | 2.151100236 | 3.022735852  | 0.003287995 | -1.818872206 |
| RP11-544D21.2 | 0.221088724  | 0.075678008 | 3.022671459  | 0.003288627 | -1.81903295  |
| RP1-102G20.2  | 0.405102124  | 0.257985249 | 3.022310304  | 0.003292176 | -1.819934445 |
| RHOD          | 0.975698691  | 3.143099498 | 3.022286952  | 0.003292406 | -1.819992731 |
| TMEM86A       | -0.42177418  | 1.726222509 | -3.021214866 | 0.003302964 | -1.822668291 |
| INCENP        | 0.38433632   | 3.069393887 | 3.020980226  | 0.003305279 | -1.823253774 |
| RP11-93G23.2  | 0.202313666  | 0.097985337 | 3.020698751  | 0.003308057 | -1.82395607  |
| CTD-2647L4.4  | 0.429391784  | 1.485018549 | 3.020584259  | 0.003309188 | -1.824241721 |
| RPL7AP2       | 0.308801931  | 0.305953984 | 3.020415827  | 0.003310853 | -1.824661931 |
| VAV2          | 0.376501747  | 3.193885755 | 3.019925209  | 0.003315706 | -1.825885838 |
| CDHR3         | 0.259757617  | 0.693865138 | 3.019589989  | 0.003319025 | -1.826721998 |
| RP11-330C7.4  | 0.345369589  | 0.172322214 | 3.019568921  | 0.003319234 | -1.826774546 |
| LINC01584     | 0.210561333  | 0.106920071 | 3.019385627  | 0.00332105  | -1.827231712 |
| TMSB10        | -0.535297294 | 10.92270055 | -3.018112344 | 0.003333694 | -1.830406891 |
| RN7SKP247     | 0.302384827  | 0.112009691 | 3.017550529  | 0.003339287 | -1.831807547 |
| DIAPH3        | 0.389960123  | 1.525473449 | 3.016999303  | 0.003344783 | -1.833181606 |
| ATG7          | -0.240229274 | 1.645827224 | -3.016858516 | 0.003346188 | -1.833532517 |
| FARP1         | 0.396929306  | 1.607998281 | 3.016504259  | 0.003349726 | -1.834415446 |
| RNU7-148P     | 0.334376476  | 0.119120459 | 3.016465934  | 0.003350109 | -1.834510961 |
| RP11-98F14.11 | 0.402532248  | 0.441804632 | 3.016155034  | 0.003353217 | -1.835285753 |
| ERMP1         | 0.497863709  | 2.081295285 | 3.015820715  | 0.003356562 | -1.836118838 |
| RNU6-1158P    | 0.260359447  | 0.126309875 | 3.015678913  | 0.003357982 | -1.836472172 |
| RP11-120E11.2 | -0.329409974 | 0.909793005 | -3.014978863 | 0.003364999 | -1.838216315 |
| GNAT3         | 0.292880567  | 0.245819832 | 3.014794511  | 0.003366849 | -1.838675565 |
| RNU6-208P     | 0.374090008  | 0.20623358  | 3.014537602  | 0.003369429 | -1.83931553  |
| RPL21P18      | 0.257025681  | 0.266557281 | 3.014450752  | 0.003370302 | -1.839531866 |

|               |              |             |              |             |              |
|---------------|--------------|-------------|--------------|-------------|--------------|
| RNU7-159P     | 0.219697931  | 0.08342889  | 3.013074436  | 0.003384158 | -1.842959483 |
| CTD-2313N18.7 | 0.259219912  | 0.401993375 | 3.012250674  | 0.003392477 | -1.845010409 |
| RP11-474P12.3 | 0.213993041  | 0.242608316 | 3.012061046  | 0.003394394 | -1.845482465 |
| LAIR1         | -0.584560415 | 1.912595568 | -3.011694451 | 0.003398105 | -1.84639499  |
| HMGB3P5       | 0.267461255  | 0.13609031  | 3.011494432  | 0.00340013  | -1.84689284  |
| RP11-573D15.2 | 0.276523443  | 0.191531599 | 3.011394243  | 0.003401145 | -1.847142201 |
| AL355480.3    | 0.38229507   | 0.501442356 | 3.011252469  | 0.003402582 | -1.847495053 |
| CTB-180A7.3   | 0.227337377  | 0.116182838 | 3.011081062  | 0.003404321 | -1.847921636 |
| RP11-498P14.4 | 0.226956512  | 0.119397336 | 3.011018589  | 0.003404954 | -1.84807711  |
| ATG10-IT1     | 0.21040533   | 0.119246883 | 3.01093347   | 0.003405818 | -1.848288939 |
| RNU6-1242P    | 0.564832922  | 0.601801981 | 3.010442147  | 0.003410806 | -1.849511553 |
| KLHL2         | 0.497725159  | 2.878703255 | 3.009658086  | 0.003418781 | -1.851462293 |
| H2AFZP1       | 0.423485902  | 0.629284994 | 3.009506673  | 0.003420323 | -1.851838961 |
| FKBP1B        | -0.420531042 | 1.241021431 | -3.008537725 | 0.003430207 | -1.854249046 |
| WHSC1L1       | 0.397740292  | 2.561580356 | 3.00769861   | 0.003438787 | -1.856335696 |
| ATP5F1        | -0.352211966 | 5.27390284  | -3.007076559 | 0.003445161 | -1.857882268 |
| STX17         | 0.290119448  | 1.750159415 | 3.006988094  | 0.003446068 | -1.858102193 |
| PLEK          | -0.652106386 | 2.500926153 | -3.006747565 | 0.003448536 | -1.858700127 |
| ANKRD22       | -0.455832232 | 0.515088095 | -3.006456589 | 0.003451524 | -1.859423416 |
| AL359771.1    | 0.301382809  | 0.138866985 | 3.006250533  | 0.003453642 | -1.859935582 |
| CERS5         | -0.243424468 | 3.024412014 | -3.006107964 | 0.003455107 | -1.86028993  |
| MIR548N       | 0.342529652  | 0.274762402 | 3.005182031  | 0.00346464  | -1.862590971 |
| MCM6          | 0.422920488  | 4.527770411 | 3.004838634  | 0.003468182 | -1.863444205 |
| RP11-2N5.2    | 0.358326367  | 0.162071579 | 3.004326822  | 0.003473467 | -1.864715754 |
| CCL28         | 0.518166383  | 1.956796032 | 3.003816501  | 0.003478744 | -1.865983429 |
| RP11-317B3.2  | 0.220477172  | 0.134543227 | 3.003700453  | 0.003479945 | -1.866271676 |
| RP11-172F10.1 | 0.243162029  | 0.122193799 | 3.003003771  | 0.003487163 | -1.868001955 |
| TJP1          | 0.465927161  | 3.429979195 | 3.002889097  | 0.003488352 | -1.868286728 |
| DPPA2P4       | 0.219186701  | 0.116136342 | 3.00284381   | 0.003488822 | -1.868399189 |
| ASXL2         | 0.253644104  | 1.932903595 | 3.002517655  | 0.003492208 | -1.869209083 |
| WAS           | -0.667143928 | 2.538619847 | -3.002229243 | 0.003495204 | -1.869925196 |
| LINC00368     | 0.205577564  | 0.098998756 | 3.00175191   | 0.003500168 | -1.871110273 |
| RN7SL150P     | 0.532953611  | 0.1930326   | 3.000604148  | 0.003512131 | -1.873959214 |

|                |              |             |              |             |              |
|----------------|--------------|-------------|--------------|-------------|--------------|
| NPM1P30        | 0.230765731  | 0.133472131 | 3.000135505  | 0.003517027 | -1.875122217 |
| RP11-678G14.5  | 0.268863824  | 0.231072334 | 2.999992773  | 0.003518519 | -1.875476397 |
| RP4-580N22.2   | 0.356824499  | 0.556432782 | 2.999501099  | 0.003523664 | -1.876696353 |
| RP11-548H3.1   | -0.322773457 | 0.983089832 | -2.999001227 | 0.003528902 | -1.877936489 |
| CTB-102L5.8    | 0.231530512  | 0.240614844 | 2.998708086  | 0.003531977 | -1.878663665 |
| CD3D           | -0.651942868 | 0.908788712 | -2.998290037 | 0.003536366 | -1.8797006   |
| RP11-271F18.4  | 0.280435331  | 0.115917716 | 2.996646003  | 0.003553678 | -1.883777361 |
| OSTCP4         | 0.288755589  | 0.556375563 | 2.995340016  | 0.003567486 | -1.88701459  |
| RP11-651L5.3   | 0.206007675  | 0.395142411 | 2.995113741  | 0.003569883 | -1.887575359 |
| GPR65          | -0.381267999 | 0.801418989 | -2.994971582 | 0.00357139  | -1.887927647 |
| ANXA13         | 0.374219736  | 0.326798703 | 2.994775124  | 0.003573474 | -1.888414475 |
| BNIPL          | 0.31854547   | 0.495104358 | 2.993799023  | 0.003583842 | -1.8908329   |
| NBEAL1         | 0.224109834  | 0.840524714 | 2.993666574  | 0.003585251 | -1.891161014 |
| MIR6895        | 0.278914276  | 0.300641132 | 2.992685352  | 0.003595706 | -1.89359141  |
| CLPS           | 0.217676497  | 0.11667089  | 2.99207522   | 0.003602221 | -1.89510233  |
| MYO7A          | -0.245998768 | 0.6886777   | -2.991893177 | 0.003604167 | -1.89555309  |
| NCF2           | -0.476033851 | 1.845255206 | -2.991080668 | 0.003612864 | -1.897564696 |
| RP11-47P18.2   | 0.381799333  | 0.155906822 | 2.990602344  | 0.003617993 | -1.898748724 |
| RP11-15E18.1   | 0.34964006   | 0.78056772  | 2.990507593  | 0.00361901  | -1.89898325  |
| RP11-249C24.12 | 0.209082507  | 0.126964622 | 2.990033275  | 0.003624104 | -1.900157184 |
| AP000868.1     | 0.257309427  | 0.108223505 | 2.989555124  | 0.003629246 | -1.901340454 |
| SMC2           | 0.431526716  | 3.205516913 | 2.989547123  | 0.003629333 | -1.901360253 |
| ARHGAP25       | -0.358450478 | 1.341577764 | -2.9886903   | 0.003638564 | -1.903480235 |
| AL033528.1     | 0.327532641  | 0.107394818 | 2.988239908  | 0.003643425 | -1.904594416 |
| KLHL11         | 0.39395341   | 1.466302355 | 2.988055627  | 0.003645416 | -1.905050252 |
| RP11-613F22.7  | 0.224628649  | 0.106557538 | 2.9872317    | 0.003654329 | -1.907088041 |
| AL136380.1     | 0.598890032  | 0.433921897 | 2.986616918  | 0.003660993 | -1.908608267 |
| RPRML          | 0.207633106  | 0.209730341 | 2.986304823  | 0.00366438  | -1.909379916 |
| RP11-84O12.3   | 0.222572482  | 0.129198131 | 2.986200334  | 0.003665515 | -1.909638249 |
| RPGRIP1L       | 0.237308406  | 1.083541319 | 2.98527455   | 0.003675582 | -1.911926793 |
| RP3-364H10.1   | 0.327481367  | 0.103428546 | 2.985147301  | 0.003676968 | -1.912241308 |
| SYNJ2-IT1      | 0.251084289  | 0.125956137 | 2.984744623  | 0.003681356 | -1.91323652  |
| RP11-968O1.5   | 0.225257073  | 0.367487097 | 2.984665606  | 0.003682218 | -1.913431798 |

|                |              |             |              |             |              |
|----------------|--------------|-------------|--------------|-------------|--------------|
| IL18           | -0.44691661  | 1.320226801 | -2.984185704 | 0.003687455 | -1.914617702 |
| DENND1C        | -0.333366113 | 0.941603542 | -2.984180662 | 0.00368751  | -1.914630161 |
| INTS4P2        | 0.249105545  | 0.383975876 | 2.983287407  | 0.003697277 | -1.916837112 |
| RP1-172I22.1   | 0.342596058  | 0.174797915 | 2.982997308  | 0.003700455 | -1.917553742 |
| UBE2D3P2       | 0.2735098    | 0.761616739 | 2.982524201  | 0.003705641 | -1.918722336 |
| AC021231.1     | 0.212667757  | 0.09441265  | 2.981902213  | 0.003712471 | -1.920258448 |
| TMEM38B        | 0.398161483  | 2.477448717 | 2.98086578   | 0.003723877 | -1.92281754  |
| RP11-190P13.2  | 0.234154366  | 0.138304547 | 2.980536624  | 0.003727506 | -1.923630122 |
| RN7SL372P      | 0.395068171  | 0.157287785 | 2.98044803   | 0.003728483 | -1.92384882  |
| RNU6ATAC38P    | 0.361279471  | 0.166277554 | 2.979001056  | 0.003744479 | -1.927420006 |
| VKORC1L1       | 0.322326016  | 3.513495677 | 2.978988652  | 0.003744616 | -1.927450613 |
| CIT            | 0.369049079  | 1.922252862 | 2.978764039  | 0.003747105 | -1.928004842 |
| RNU6-563P      | 0.213235662  | 0.130234101 | 2.978716834  | 0.003747629 | -1.928121314 |
| STIL           | 0.396937968  | 2.06058259  | 2.97798386   | 0.003755762 | -1.929929656 |
| COTL1P2        | 0.240757776  | 0.143543367 | 2.977902936  | 0.003756661 | -1.930129285 |
| EDN2           | 0.399584386  | 0.227621794 | 2.977087546  | 0.00376573  | -1.932140498 |
| RP11-246A10.1  | 0.280890974  | 0.179296862 | 2.976785229  | 0.003769098 | -1.932886071 |
| IKBKAP         | 0.329700439  | 3.339643194 | 2.976096341  | 0.003776782 | -1.934584778 |
| IGSF6          | -0.551964325 | 2.157841233 | -2.974954611 | 0.00378955  | -1.937399443 |
| RP11-316M1.3   | 0.21919657   | 0.352792192 | 2.973407195  | 0.003806917 | -1.941212856 |
| BRK1           | -0.365027655 | 6.735798467 | -2.973278827 | 0.003808361 | -1.941529132 |
| PGPEP1         | -0.363350172 | 2.150862283 | -2.973189689 | 0.003809364 | -1.941748746 |
| RNU6-346P      | 0.329793668  | 0.145775283 | 2.973112174  | 0.003810237 | -1.94193972  |
| MIR4634        | 0.414640742  | 0.140469093 | 2.972738172  | 0.003814449 | -1.94286109  |
| CH17-340M24.3  | -0.516188373 | 2.207244397 | -2.97065596  | 0.003837978 | -1.947989021 |
| RNU6-183P      | 0.201913167  | 0.091724062 | 2.969649124  | 0.003849404 | -1.950467559 |
| CASZ1          | 0.297758791  | 0.521644632 | 2.968933674  | 0.003857541 | -1.952228383 |
| RP11-631F7.1   | 0.223574474  | 0.178362061 | 2.968706335  | 0.003860131 | -1.952787824 |
| AC144573.1     | 0.453022949  | 0.179455807 | 2.9679947    | 0.003868246 | -1.954538814 |
| UBN2           | 0.260842511  | 1.443321364 | 2.967933017  | 0.00386895  | -1.95469057  |
| RP11-1394O16.1 | 0.205020917  | 0.13855559  | 2.967849184  | 0.003869907 | -1.954896819 |
| LA16c-390E6.3  | 0.298730065  | 0.228406608 | 2.967238053  | 0.003876892 | -1.956400191 |
| DNAH10         | 0.379109839  | 0.646139568 | 2.967185194  | 0.003877497 | -1.956530211 |



|               |              |             |              |             |              |
|---------------|--------------|-------------|--------------|-------------|--------------|
| C5AR1         | -0.6116134   | 2.354298002 | -2.966998711 | 0.00387963  | -1.9569889   |
| AP000253.1    | 0.275912603  | 0.260579385 | 2.966821901  | 0.003881655 | -1.957423775 |
| AC007064.22   | 0.211004121  | 0.083244069 | 2.965731001  | 0.003894166 | -1.960106455 |
| RP11-469A15.2 | 0.249993153  | 0.138748401 | 2.965490486  | 0.003896929 | -1.960697811 |
| FKSG68        | 0.425542522  | 0.248674725 | 2.964927261  | 0.003903407 | -1.962082464 |
| AXDND1        | 0.215038778  | 0.11268247  | 2.964751103  | 0.003905435 | -1.962515495 |
| RP11-711K1.8  | 0.421296135  | 0.196397813 | 2.964673661  | 0.003906327 | -1.962705855 |
| RNU6-980P     | 0.396126415  | 0.149154526 | 2.964595045  | 0.003907233 | -1.962899098 |
| DCD           | 0.20059458   | 0.079951418 | 2.964475414  | 0.003908611 | -1.963193151 |
| AC102953.6    | 0.430870641  | 0.342671858 | 2.964305164  | 0.003910574 | -1.963611606 |
| ENTPD2        | 0.33463477   | 0.318742108 | 2.963873134  | 0.003915558 | -1.964673404 |
| CEBPA-AS1     | -0.370218861 | 0.73096155  | -2.963719271 | 0.003917335 | -1.965051522 |
| AL160279.1    | 0.2217822    | 0.101154028 | 2.963707185  | 0.003917474 | -1.965081225 |
| SNORD114-18   | 0.347033809  | 0.137728657 | 2.963579072  | 0.003918954 | -1.965396049 |
| CTSH          | -0.672788898 | 3.081713047 | -2.963102428 | 0.003924464 | -1.966567256 |
| RPS10P21      | 0.226390108  | 0.107243436 | 2.962957018  | 0.003926147 | -1.96692453  |
| ST14          | -0.525248028 | 1.725315768 | -2.961886043 | 0.003938559 | -1.969555474 |
| RNU6-1155P    | 0.32151652   | 0.131546198 | 2.96144134   | 0.003943723 | -1.970647705 |
| RAB11FIP1     | 0.615361289  | 1.599584269 | 2.961233077  | 0.003946144 | -1.971159171 |
| F11-AS1       | 0.214150221  | 0.124131116 | 2.96099236   | 0.003948944 | -1.971750305 |
| RP11-848P1.2  | -0.370756944 | 1.184838498 | -2.959873542 | 0.003961981 | -1.974497309 |
| RYR2          | 0.217967683  | 0.15408608  | 2.959364677  | 0.003967923 | -1.975746435 |
| HMGA1P8       | 0.376020229  | 0.765037795 | 2.958590022  | 0.003976986 | -1.977647676 |
| TNFRSF1B      | -0.557737248 | 3.115285991 | -2.958424589 | 0.003978923 | -1.978053645 |
| GCA           | -0.440403592 | 1.359885989 | -2.957841401 | 0.003985762 | -1.979484643 |
| PRKAA1        | 0.385203301  | 2.993697631 | 2.956378391  | 0.004002964 | -1.983073503 |
| CELF2         | -0.555628756 | 1.404439184 | -2.956369676 | 0.004003066 | -1.983094876 |
| PGM3          | 0.430019603  | 3.046794231 | 2.955077925  | 0.004018312 | -1.986262439 |
| RP11-15E18.5  | 0.416259711  | 0.958894894 | 2.95495331   | 0.004019786 | -1.986567955 |
| KCTD17        | -0.348521988 | 3.071493535 | -2.954659976 | 0.004023257 | -1.987287076 |
| NAA25         | 0.316738446  | 1.948269095 | 2.954320083  | 0.004027282 | -1.988120265 |
| DLGAP1        | 0.212038787  | 0.165292978 | 2.95389663   | 0.004032302 | -1.98915818  |
| RP11-534C12.1 | -0.406589595 | 1.112952946 | -2.953887573 | 0.004032409 | -1.989180376 |

|               |              |             |              |             |              |
|---------------|--------------|-------------|--------------|-------------|--------------|
| SRGAP2D       | 0.373130857  | 1.343895967 | 2.953701737  | 0.004034614 | -1.989635836 |
| RP1-161N10.1  | 0.216009445  | 0.154891234 | 2.95341815   | 0.004037981 | -1.990330824 |
| KLC2          | 0.34566434   | 2.720092563 | 2.953252347  | 0.00403995  | -1.990737134 |
| KLHDC10       | 0.321373471  | 3.10358433  | 2.953138651  | 0.004041301 | -1.991015744 |
| RALGPS2       | 0.66586065   | 1.691286172 | 2.952961775  | 0.004043404 | -1.991449157 |
| RNU4-61P      | 0.528918304  | 0.23835014  | 2.952122761  | 0.004053393 | -1.993504767 |
| TSC22D3       | -0.605154085 | 4.263689514 | -2.952067643 | 0.00405405  | -1.993639792 |
| HAUS6         | 0.335886532  | 1.965680524 | 2.95157757   | 0.004059895 | -1.994840255 |
| RN7SL74P      | 0.283255734  | 0.09581768  | 2.951459363  | 0.004061307 | -1.995129784 |
| HELB          | 0.281542602  | 1.076208442 | 2.951266379  | 0.004063611 | -1.995602451 |
| RPL35AP32     | 0.5470833    | 1.472386808 | 2.951010927  | 0.004066664 | -1.996228079 |
| RPS16P9       | 0.294540987  | 0.343419831 | 2.950990037  | 0.004066914 | -1.996279239 |
| SLC7A1        | 0.477313542  | 3.249980445 | 2.950862199  | 0.004068442 | -1.996592309 |
| MSRA          | -0.420491522 | 1.362809083 | -2.950620348 | 0.004071336 | -1.997184562 |
| MRPS36P4      | 0.350271355  | 0.15539298  | 2.950085545  | 0.004077741 | -1.99849407  |
| RP4-761J14.10 | -0.333129572 | 0.892976318 | -2.946909652 | 0.004115967 | -2.006266576 |
| CKS1BP6       | 0.337120487  | 0.550718278 | 2.946903056  | 0.004116047 | -2.006282712 |
| RP11-582E3.6  | -0.348847509 | 1.75049934  | -2.946689106 | 0.004118634 | -2.00680608  |
| MLLT1         | 0.372228719  | 4.797788557 | 2.946514732  | 0.004120743 | -2.007232613 |
| RP11-458D21.1 | 0.302615742  | 0.524350777 | 2.945884983  | 0.004128371 | -2.008772864 |
| TMEM154       | 0.216364055  | 0.388412518 | 2.945812708  | 0.004129247 | -2.008949619 |
| LINC01492     | 0.269779799  | 0.104526085 | 2.945495131  | 0.004133099 | -2.009726239 |
| CTD-2201E18.3 | 0.349991537  | 1.738324296 | 2.944534658  | 0.004144769 | -2.012074623 |
| YWHAH         | -0.360133179 | 5.619847678 | -2.943931865 | 0.004152109 | -2.013548155 |
| RP11-175P13.2 | 0.328853995  | 0.382017785 | 2.9437318    | 0.004154548 | -2.014037162 |
| CTD-2622I13.3 | 0.251752193  | 0.449598523 | 2.94365983   | 0.004155425 | -2.014213067 |
| LIN28A        | 0.224825716  | 0.116245417 | 2.94312277   | 0.004161979 | -2.015525615 |
| RNY1P7        | 0.281908011  | 0.096882574 | 2.942891592  | 0.004164804 | -2.016090543 |
| CTD-2537I9.13 | 0.263886748  | 0.425582285 | 2.942532622  | 0.004169193 | -2.016967685 |
| RP11-302F12.3 | 0.461910898  | 0.185724277 | 2.942394828  | 0.004170879 | -2.017304359 |
| SEPHS1P6      | 0.339540719  | 0.573379877 | 2.942048066  | 0.004175124 | -2.018151558 |
| RNU7-97P      | 0.68949945   | 0.338012301 | 2.941945154  | 0.004176385 | -2.018402974 |
| CHD6          | 0.337271286  | 2.089815736 | 2.941597848  | 0.004180642 | -2.019251397 |

|               |              |             |              |             |              |
|---------------|--------------|-------------|--------------|-------------|--------------|
| ARHGAP18      | -0.447284061 | 2.400385841 | -2.940728596 | 0.004191314 | -2.021374514 |
| RP11-6J21.2   | 0.296840732  | 0.105810191 | 2.940682946  | 0.004191876 | -2.021486    |
| HNRNPKP2      | 0.367350241  | 1.384463063 | 2.94034542   | 0.004196027 | -2.022310249 |
| ARHGEF33      | 0.255073651  | 0.374188591 | 2.939614602  | 0.004205029 | -2.02409467  |
| CCL4          | -0.502592419 | 1.039387816 | -2.939437289 | 0.004207215 | -2.024527558 |
| AC010894.3    | -0.323596001 | 0.866566904 | -2.938672782 | 0.004216656 | -2.026393765 |
| RP3-327A19.7  | -0.373620278 | 0.697651702 | -2.938608592 | 0.004217449 | -2.026550439 |
| RP11-958N24.1 | 0.260214869  | 0.637885409 | 2.938532354  | 0.004218392 | -2.026736515 |
| PPM1M         | -0.346223028 | 2.432262875 | -2.937935271 | 0.004225781 | -2.028193704 |
| BPIFB1        | 0.253840115  | 0.107221828 | 2.937831375  | 0.004227068 | -2.028447239 |
| FKBP8         | -0.352075082 | 6.149953506 | -2.937000182 | 0.004237377 | -2.030475322 |
| MIR3126       | 0.455484484  | 0.436494023 | 2.936937454  | 0.004238156 | -2.030628358 |
| TUBA1A        | -0.523482197 | 6.223616348 | -2.936902198 | 0.004238594 | -2.030714372 |
| RP11-178F10.1 | 0.257582556  | 0.328876481 | 2.936594143  | 0.004242422 | -2.031465878 |
| RP11-90C4.1   | 0.32850345   | 0.134188284 | 2.936556192  | 0.004242894 | -2.031558456 |
| C6orf1        | -0.400440295 | 2.968180871 | -2.934384615 | 0.00426997  | -2.036854216 |
| RP11-214K3.5  | 0.267455601  | 0.179057154 | 2.934213074  | 0.004272115 | -2.037272413 |
| AL138807.1    | 0.455644611  | 0.247501091 | 2.933898498  | 0.004276053 | -2.038039265 |
| RP11-893F2.5  | 0.282279517  | 0.558501823 | 2.933673458  | 0.004278871 | -2.038587809 |
| RP11-212D3.2  | 0.258647282  | 0.281192805 | 2.933522349  | 0.004280765 | -2.038956127 |
| RP11-219E7.1  | -0.496491529 | 1.151270122 | -2.933428875 | 0.004281937 | -2.039183954 |
| RPS6KA1       | -0.400370615 | 2.263972671 | -2.933188302 | 0.004284954 | -2.039770286 |
| RPS12P2       | 0.236104747  | 0.114697549 | 2.93261366   | 0.004292169 | -2.041170663 |
| KLHL2P1       | 0.266300626  | 0.36914168  | 2.931819482  | 0.004302158 | -2.043105677 |
| RP11-3K24.2   | 0.329329225  | 0.18809536  | 2.93155646   | 0.004305471 | -2.043746437 |
| RNU6-625P     | 0.313116785  | 0.201013795 | 2.931204509  | 0.004309908 | -2.04460377  |
| RPS6P21       | 0.205292972  | 0.152430736 | 2.930737788  | 0.004315799 | -2.045740547 |
| CEACAM22P     | 0.205246346  | 0.114496137 | 2.930278298  | 0.004321605 | -2.046859571 |
| RN7SKP117     | 0.330138631  | 0.178223195 | 2.930034272  | 0.004324692 | -2.047453803 |
| RP11-397P13.6 | 0.285275924  | 0.451727157 | 2.929976808  | 0.004325419 | -2.047593729 |
| ZNF107        | 0.286859526  | 1.269500471 | 2.9297746    | 0.004327979 | -2.048086095 |
| MNS1          | 0.546189272  | 2.29192732  | 2.92968834   | 0.004329071 | -2.048296124 |
| RP11-142O6.1  | 0.286156116  | 0.294543607 | 2.929394246  | 0.004332797 | -2.04901216  |

|                  |              |             |              |             |              |
|------------------|--------------|-------------|--------------|-------------|--------------|
| BX322557.10      | 0.50318846   | 1.964403606 | 2.928780135  | 0.004340587 | -2.050507158 |
| FIS1             | -0.441545938 | 4.905978772 | -2.928329007 | 0.004346318 | -2.051605228 |
| CTA-384D8.36     | -0.493104175 | 2.411943664 | -2.927564159 | 0.00435605  | -2.053466599 |
| RP1-177I10.1     | 0.206823679  | 0.092330854 | 2.926937158  | 0.004364043 | -2.054992206 |
| MSANTD2P1        | 0.204982507  | 0.076141772 | 2.926519674  | 0.004369373 | -2.056007877 |
| RP5-1119A7.14    | 0.475052715  | 0.331789878 | 2.926272693  | 0.004372529 | -2.056608687 |
| TFR2             | 0.468896192  | 1.36186095  | 2.925439461  | 0.004383191 | -2.058635316 |
| RNA5SP97         | 0.304104841  | 0.13831799  | 2.925226106  | 0.004385925 | -2.059154175 |
| RP11-209A2.1     | 0.398354764  | 0.387371178 | 2.924711145  | 0.00439253  | -2.060406385 |
| CTB-4E7.1        | 0.894330775  | 1.243966454 | 2.924547739  | 0.004394628 | -2.060803695 |
| XXbac-B562F10.11 | 0.26995658   | 0.835290799 | 2.923802132  | 0.004404212 | -2.062616362 |
| GPX1             | -0.570476338 | 7.073577961 | -2.923504465 | 0.004408044 | -2.063339925 |
| AC121336.1       | 0.359842817  | 0.178357933 | 2.922833605  | 0.00441669  | -2.064970419 |
| RP11-346L1.2     | 0.356422769  | 0.149116654 | 2.920649272  | 0.004444953 | -2.07027726  |
| RP11-732A21.3    | 0.369395304  | 0.816270235 | 2.920263208  | 0.004449966 | -2.07121487  |
| SNORA73          | 0.402310697  | 0.180542338 | 2.920113081  | 0.004451916 | -2.071579447 |
| RP11-473P24.2    | 0.287246551  | 0.40820393  | 2.919946603  | 0.00445408  | -2.071983715 |
| YEATS2           | 0.319061237  | 2.797530131 | 2.919680788  | 0.004457537 | -2.07262917  |
| FPR3             | -0.728909813 | 2.764106517 | -2.919093776 | 0.004465181 | -2.074054392 |
| TNPO2            | 0.435332593  | 3.895280013 | 2.918973139  | 0.004466753 | -2.074347263 |
| RP11-736N17.9    | 0.678606367  | 0.753738614 | 2.917900085  | 0.004480761 | -2.076951874 |
| RP11-9E13.4      | 0.351486403  | 0.463784848 | 2.917861701  | 0.004481263 | -2.077045028 |
| ATPAF2           | -0.561048094 | 2.399429899 | -2.916451195 | 0.00449974  | -2.080467528 |
| SETP5            | 0.212168403  | 0.234489869 | 2.916390254  | 0.004500539 | -2.080615366 |
| CTD-2535P7.1     | 0.224491164  | 0.081096883 | 2.915914373  | 0.00450679  | -2.081769739 |
| AC009081.1       | 0.231188336  | 0.078207004 | 2.915508752  | 0.004512124 | -2.08275356  |
| RP11-305E17.4    | 0.235659124  | 0.143035282 | 2.915414477  | 0.004513365 | -2.082982203 |
| RP11-2P2.1       | 0.379265291  | 0.225375779 | 2.915241827  | 0.004515637 | -2.083400915 |
| NANOGP5          | 0.224972224  | 0.305593571 | 2.915139397  | 0.004516986 | -2.083649321 |
| RNU6-740P        | 0.277101326  | 0.081870846 | 2.914976492  | 0.004519132 | -2.084044369 |
| RP11-500K19.2    | 0.312027038  | 0.158965298 | 2.913014007  | 0.004545059 | -2.088802053 |
| PIK3CD           | -0.499027769 | 1.581904546 | -2.912390015 | 0.004553331 | -2.090314264 |
| AP000692.10      | 0.275592806  | 0.543749359 | 2.912317857  | 0.004554289 | -2.09048912  |

|               |              |             |              |             |              |
|---------------|--------------|-------------|--------------|-------------|--------------|
| RP11-123C21.2 | 0.256172161  | 0.189086307 | 2.911687248  | 0.004562664 | -2.092017072 |
| COPS7A        | -0.407060957 | 4.610958109 | -2.91167754  | 0.004562793 | -2.092040593 |
| SNORA1        | 0.323857049  | 0.215193874 | 2.911611455  | 0.004563672 | -2.092200699 |
| RPL35AP33     | 0.284956027  | 0.345350501 | 2.911557113  | 0.004564395 | -2.092332354 |
| RHOC          | -0.389391434 | 5.9473506   | -2.911063154 | 0.004570968 | -2.093528975 |
| HMGN2P32      | 0.388017722  | 0.516438086 | 2.910352372  | 0.004580441 | -2.09525057  |
| RNF130        | -0.344261949 | 2.624494646 | -2.910030734 | 0.004584734 | -2.096029501 |
| CTD-2283N19.1 | 0.279676195  | 0.277571556 | 2.909838224  | 0.004587305 | -2.096495682 |
| ANKRD45       | 0.44496847   | 0.939365856 | 2.908877519  | 0.004600156 | -2.098821749 |
| BIN2          | -0.379346959 | 1.168002426 | -2.908483777 | 0.004605432 | -2.0997749   |
| MAP2K7        | 0.425627594  | 3.608590278 | 2.908470154  | 0.004605615 | -2.099807875 |
| CXCL10        | -1.074061793 | 2.357375227 | -2.908138272 | 0.004610067 | -2.100611197 |
| SLC38A7       | -0.305378994 | 2.451682074 | -2.905346481 | 0.004647674 | -2.107365799 |
| RP11-40H20.4  | 0.338601615  | 0.13176108  | 2.905099613  | 0.004651014 | -2.107962834 |
| LG MN         | -0.428015326 | 5.424693544 | -2.904909885 | 0.004653581 | -2.108421651 |
| RP11-867O8.5  | 0.211933291  | 0.175235234 | 2.904816893  | 0.00465484  | -2.108646522 |
| AC007679.1    | 0.427474043  | 0.22870073  | 2.904392623  | 0.004660588 | -2.109672414 |
| GAB1          | 0.373500854  | 1.999727143 | 2.904047521  | 0.004665269 | -2.110506788 |
| RP11-324I22.2 | 0.251301591  | 0.102085213 | 2.902367885  | 0.00468811  | -2.114566599 |
| CYP1A2        | 0.25023028   | 0.091892479 | 2.901973201  | 0.004693492 | -2.115520306 |
| VWA8          | 0.291813928  | 1.636859298 | 2.901230257  | 0.004703639 | -2.117315259 |
| ZBED6         | 0.45246896   | 1.163077216 | 2.901116684  | 0.004705192 | -2.117589619 |
| RP11-255P5.2  | 0.246185903  | 0.089034852 | 2.899905741  | 0.004721778 | -2.120514371 |
| RNU6-636P     | 0.445094379  | 0.232879552 | 2.899430287  | 0.004728305 | -2.121662449 |
| FP236383.9    | 1.378865806  | 3.784549832 | 2.899156694  | 0.004732065 | -2.122323026 |
| UBE2V2P3      | 0.206220604  | 0.377280089 | 2.899003219  | 0.004734176 | -2.122693562 |
| RP5-1171I10.5 | -0.354942926 | 0.716253134 | -2.89837638  | 0.004742804 | -2.124206778 |
| RPS27P23      | 0.264692554  | 0.280794304 | 2.898002628  | 0.004747955 | -2.125108904 |
| AC090587.2    | 0.220265672  | 0.45392268  | 2.897855309  | 0.004749987 | -2.125464463 |
| RP11-463M14.1 | 0.527150677  | 0.177680108 | 2.897789837  | 0.00475089  | -2.125622478 |
| RP3-391O22.1  | 0.343282049  | 0.37076848  | 2.897689579  | 0.004752273 | -2.125864441 |
| AC004813.1    | 0.234565855  | 0.232173224 | 2.897405931  | 0.00475619  | -2.126548961 |
| AC004076.5    | 0.248314809  | 0.51122962  | 2.8974051    | 0.004756201 | -2.126550968 |

|                |              |             |              |             |              |
|----------------|--------------|-------------|--------------|-------------|--------------|
| PLD4           | -0.260993939 | 0.479704332 | -2.89740479  | 0.004756205 | -2.126551714 |
| RPL19P14       | 0.25406734   | 0.164817856 | 2.897300449  | 0.004757647 | -2.126803504 |
| DYM            | 0.276237541  | 2.910775394 | 2.89728319   | 0.004757885 | -2.126845152 |
| ZNF385B        | 0.537938915  | 0.88498475  | 2.896626191  | 0.00476697  | -2.128430411 |
| TRBC2          | -0.781572077 | 1.153541304 | -2.895871443 | 0.004777427 | -2.130251166 |
| ZBTB37         | 0.27358179   | 1.09752079  | 2.894948022  | 0.004790249 | -2.132478307 |
| RNA5SP477      | 0.457715101  | 0.343097462 | 2.894147758  | 0.004801387 | -2.134407949 |
| VPS28          | -0.406040557 | 4.451945135 | -2.893620423 | 0.004808739 | -2.135679254 |
| AC004158.1     | 0.294733496  | 0.301929839 | 2.893154099  | 0.004815249 | -2.136803317 |
| C2             | -0.759919053 | 2.297940348 | -2.892602999 | 0.004822953 | -2.138131542 |
| RP11-15G8.1    | 0.292940812  | 0.109128848 | 2.892380835  | 0.004826062 | -2.138666928 |
| MTRF1          | 0.253191597  | 1.367573358 | 2.892159387  | 0.004829163 | -2.139200556 |
| GAL3ST2        | 0.351004072  | 0.22501796  | 2.892009614  | 0.004831261 | -2.13956145  |
| RP11-1058N17.1 | 0.336307622  | 0.250428554 | 2.89196403   | 0.0048319   | -2.139671287 |
| SRP72P1        | 0.292427386  | 0.263423769 | 2.891351887  | 0.004840486 | -2.14114613  |
| RP11-67M9.1    | 0.267388435  | 0.114534129 | 2.89125172   | 0.004841892 | -2.141387439 |
| GAB3           | -0.257756471 | 0.824223103 | -2.891217301 | 0.004842375 | -2.141470354 |
| RP11-360A18.1  | 0.228906317  | 0.070270566 | 2.890987303  | 0.004845606 | -2.142024407 |
| PKD1           | 0.402661382  | 3.072720184 | 2.890930608  | 0.004846402 | -2.142160975 |
| RAB6A          | 0.330103883  | 4.563739843 | 2.889723939  | 0.004863387 | -2.145067137 |
| RP11-467I20.6  | 0.279651659  | 0.161795028 | 2.889676641  | 0.004864053 | -2.14518103  |
| BTK            | -0.400505735 | 1.248955412 | -2.889556856 | 0.004865743 | -2.145469463 |
| SNX30          | 0.326029002  | 2.089692484 | 2.888807822  | 0.004876318 | -2.147272872 |
| CTIF           | 0.29173031   | 2.404251457 | 2.888728225  | 0.004877443 | -2.147464492 |
| CTC-527H23.2   | 0.275484419  | 0.103927558 | 2.88843125   | 0.004881642 | -2.14817938  |
| ZNF273         | 0.281960144  | 0.966085661 | 2.888259614  | 0.004884071 | -2.148592522 |
| KHSRPP1        | 0.234541971  | 0.461957526 | 2.887665374  | 0.004892488 | -2.150022753 |
| GS1-124K5.3    | 0.282506637  | 0.678313486 | 2.886980709  | 0.004902202 | -2.151670325 |
| RP11-697E2.12  | 0.208557961  | 0.147281305 | 2.88689602   | 0.004903405 | -2.151874098 |
| LINC01053      | 0.28645501   | 0.120636762 | 2.886566779  | 0.004908084 | -2.152666249 |
| MYO19          | 0.315192934  | 1.772432479 | 2.886491138  | 0.004909159 | -2.152848231 |
| SIGLEC9        | -0.405068567 | 1.236558852 | -2.885921934 | 0.00491726  | -2.154217532 |
| RARRES3        | -0.858273114 | 2.784735545 | -2.88588502  | 0.004917785 | -2.154306324 |

|               |              |             |              |             |              |
|---------------|--------------|-------------|--------------|-------------|--------------|
| RP1-21O18.3   | 0.319061014  | 0.234434954 | 2.885697402  | 0.004920458 | -2.154757613 |
| C12orf10      | -0.378444375 | 3.735738167 | -2.884383146 | 0.004939219 | -2.157918206 |
| IFFO1         | -0.385930974 | 2.454337106 | -2.884154232 | 0.004942494 | -2.158468591 |
| SPOCK2        | -0.396578541 | 1.057629826 | -2.883577558 | 0.004950751 | -2.15985495  |
| CCL8          | -0.608191431 | 1.057895887 | -2.883446195 | 0.004952634 | -2.160170725 |
| RP11-503I22.2 | 0.201349821  | 0.080791644 | 2.883136814  | 0.004957071 | -2.160914375 |
| AC004862.6    | 0.365864268  | 0.614757785 | 2.882818475  | 0.004961641 | -2.161679492 |
| VPS18         | -0.311425525 | 3.331755671 | -2.882302979 | 0.004969048 | -2.162918321 |
| SMC5          | 0.358500805  | 2.88756097  | 2.882206563  | 0.004970435 | -2.163150006 |
| RP11-328P23.3 | 0.566223934  | 0.626953253 | 2.8820003    | 0.004973402 | -2.163645629 |
| METTL7B       | -0.631703505 | 1.178027368 | -2.881247596 | 0.004984245 | -2.165454038 |
| HMG11P5       | 0.349789175  | 0.170829026 | 2.880945865  | 0.004988598 | -2.166178855 |
| FDPSP5        | 0.272571752  | 0.381280551 | 2.880532662  | 0.004994564 | -2.167171349 |
| AC009501.4    | 0.209019025  | 0.468738098 | 2.880372487  | 0.004996879 | -2.167556049 |
| AC078883.4    | 0.241476436  | 0.186233896 | 2.87927636   | 0.005012745 | -2.170188216 |
| AC007567.1    | 0.432333411  | 0.151779926 | 2.879158189  | 0.005014458 | -2.170471935 |
| LGR4          | 0.644175685  | 2.984274859 | 2.878750829  | 0.005020368 | -2.171449904 |
| SLC25A5P6     | 0.230728593  | 0.254004008 | 2.87856567   | 0.005023057 | -2.171894388 |
| DLEU2         | 0.320551817  | 1.105367849 | 2.878169966  | 0.005028807 | -2.172844215 |
| MPP3          | 0.290443222  | 1.012632171 | 2.878067396  | 0.005030298 | -2.173090402 |
| BRWD1         | 0.305357417  | 1.881229585 | 2.877990408  | 0.005031418 | -2.173275182 |
| RICTOR        | 0.342651085  | 1.519337653 | 2.877638331  | 0.005036541 | -2.17412016  |
| SCEL          | 0.238899459  | 0.091905006 | 2.877489191  | 0.005038713 | -2.174478067 |
| SRA1          | -0.342418081 | 3.351110322 | -2.876746202 | 0.005049545 | -2.176260873 |
| RNU6-933P     | 0.528568436  | 0.220227785 | 2.876618696  | 0.005051406 | -2.176566788 |
| RP11-174M13.2 | 0.293614221  | 0.099672367 | 2.875868097  | 0.005062375 | -2.178367411 |
| RP11-196H14.2 | 0.219785167  | 0.113472076 | 2.875452403  | 0.005068459 | -2.179364462 |
| C8orf58       | -0.288166895 | 1.803817226 | -2.874907523 | 0.005076444 | -2.180671192 |
| SLC25A15      | 0.398360438  | 2.077438689 | 2.874780663  | 0.005078304 | -2.180975398 |
| NOS1AP        | 0.254269714  | 0.462084189 | 2.874758121  | 0.005078635 | -2.181029453 |
| TRPM2         | -0.36159309  | 0.997101672 | -2.874316905 | 0.005085112 | -2.182087385 |
| RP11-357J22.1 | 0.267511712  | 0.121937322 | 2.874245564  | 0.00508616  | -2.18225843  |
| RP11-686D22.4 | -0.494540588 | 1.673726456 | -2.874146595 | 0.005087614 | -2.182495713 |

|               |              |             |              |             |              |
|---------------|--------------|-------------|--------------|-------------|--------------|
| DDX28         | -0.318363209 | 2.525195871 | -2.873568662 | 0.005096113 | -2.183881192 |
| RP11-73M18.11 | 0.276058582  | 0.218491103 | 2.873519375  | 0.005096838 | -2.183999338 |
| RP11-140I16.3 | -0.339191461 | 0.573740027 | -2.873119983 | 0.00510272  | -2.184956657 |
| SYNGAP1       | 0.317868993  | 1.648306746 | 2.872601708  | 0.005110362 | -2.186198772 |
| CTD-3032H12.1 | 0.376608988  | 0.166235584 | 2.872444642  | 0.00511268  | -2.186575165 |
| RP11-196D18.2 | 0.213106125  | 0.10918903  | 2.872238336  | 0.005115726 | -2.187069532 |
| MED13         | 0.313597475  | 2.925108328 | 2.872178637  | 0.005116608 | -2.187212581 |
| PSMD10P1      | 0.271157022  | 0.499078336 | 2.869884626  | 0.005150598 | -2.19270764  |
| FAM219A       | 0.401900018  | 3.194509891 | 2.869866394  | 0.005150869 | -2.192751297 |
| RP11-845C23.2 | 0.200136358  | 0.219577148 | 2.869714392  | 0.005153129 | -2.193115275 |
| AC017101.10   | 0.290594526  | 0.214597016 | 2.869663375  | 0.005153887 | -2.193237435 |
| AC124276.1    | 0.309649002  | 0.153488084 | 2.8695283    | 0.005155896 | -2.19356086  |
| ATP7A         | 0.332785063  | 1.875044928 | 2.869349487  | 0.005158557 | -2.193988995 |
| RNASET2       | -0.386490599 | 2.115536916 | -2.869049107 | 0.005163029 | -2.194708151 |
| SUPT4H1       | -0.339813459 | 4.769288711 | -2.868661151 | 0.005168811 | -2.195636886 |
| RNU7-54P      | 0.361815471  | 0.130241977 | 2.867985459  | 0.005178894 | -2.197254197 |
| COLGALT2      | 0.658477405  | 2.112863774 | 2.867925594  | 0.005179789 | -2.197397472 |
| AC025166.1    | 0.251083227  | 0.205983389 | 2.867502096  | 0.005186119 | -2.198410967 |
| NPM1P49       | 0.301814968  | 0.175204562 | 2.866850376  | 0.005195874 | -2.199970391 |
| SAMD4B        | 0.346281814  | 4.521124295 | 2.866849018  | 0.005195895 | -2.19997364  |
| RP11-14N9.2   | 0.216792001  | 0.093574928 | 2.866522484  | 0.005200789 | -2.200754858 |
| NLRP3         | -0.246975963 | 0.62222464  | -2.866481705 | 0.005201401 | -2.200852415 |
| CD7           | -0.482561755 | 0.76639913  | -2.865379855 | 0.005217949 | -2.203487974 |
| B2M           | -0.62479574  | 8.380727688 | -2.865208734 | 0.005220523 | -2.203897212 |
| RP11-324I22.4 | 0.265137648  | 0.707015334 | 2.864286494  | 0.005234417 | -2.206102417 |
| CTC-550M4.1   | 0.322722045  | 0.108418717 | 2.863703389  | 0.005243219 | -2.207496406 |
| RP11-166O4.4  | 0.36426624   | 0.376753966 | 2.863330662  | 0.005248853 | -2.208387338 |
| FTX           | 0.211960886  | 0.640274454 | 2.863043153  | 0.005253203 | -2.209074509 |
| DLGAP1-AS4    | 0.216646203  | 0.089141482 | 2.862989197  | 0.005254019 | -2.209203462 |
| RNU6-1310P    | 0.459467972  | 0.238008161 | 2.862896481  | 0.005255423 | -2.209425044 |
| GMPS          | 0.313036909  | 3.350907739 | 2.862313761  | 0.005264252 | -2.210817563 |
| CTB-35F21.1   | 0.240163447  | 0.288600825 | 2.860959895  | 0.005284817 | -2.214051996 |
| FARP2         | 0.358026254  | 2.026638261 | 2.860809431  | 0.005287107 | -2.214411382 |



|                |              |             |              |             |              |
|----------------|--------------|-------------|--------------|-------------|--------------|
| RP11-727A23.4  | 0.382688159  | 0.65913978  | 2.860776786  | 0.005287604 | -2.214489352 |
| MSMO1          | 0.551439664  | 3.845036986 | 2.860292408  | 0.005294983 | -2.215646187 |
| TAT            | 0.268648287  | 0.114808684 | 2.860057765  | 0.005298562 | -2.216206524 |
| OSTCP1         | 0.286563064  | 0.270313301 | 2.85975611   | 0.005303165 | -2.216926833 |
| HACE1          | 0.2621121    | 1.116680966 | 2.859589239  | 0.005305713 | -2.217325272 |
| MARK2          | 0.289973023  | 3.256650613 | 2.859177113  | 0.00531201  | -2.218309224 |
| CTD-2182N23.1  | 0.291515202  | 0.285385248 | 2.858589662  | 0.005320999 | -2.219711568 |
| PLEKHM3        | 0.252302536  | 0.802243748 | 2.858536885  | 0.005321807 | -2.219837543 |
| SDSL           | -0.487057641 | 2.265562417 | -2.857779332 | 0.005333421 | -2.221645575 |
| IGFL2          | 0.226808253  | 0.225567764 | 2.857712007  | 0.005334454 | -2.221806239 |
| MMP11          | -0.843279452 | 3.38431194  | -2.857507183 | 0.005337599 | -2.222295012 |
| ESCO2          | 0.318709465  | 1.152363576 | 2.85740824   | 0.005339119 | -2.222531109 |
| RP11-361M4.1   | 0.318372343  | 0.13979878  | 2.857200805  | 0.005342306 | -2.223026069 |
| LINC01558      | 0.236807952  | 0.267750043 | 2.856511467  | 0.00535291  | -2.224670685 |
| AC116050.1     | 0.230911835  | 0.118894922 | 2.856373095  | 0.005355041 | -2.225000773 |
| RNU7-153P      | 0.407392103  | 0.128095374 | 2.8563673    | 0.005355131 | -2.225014597 |
| LTN1           | 0.423959572  | 2.259959939 | 2.855846774  | 0.005363154 | -2.2262562   |
| SFXN2          | 0.302437731  | 0.940130785 | 2.855740999  | 0.005364786 | -2.226508479 |
| CORO7          | -0.262943697 | 1.16996983  | -2.855254287 | 0.0053723   | -2.227669224 |
| RP11-415J8.3   | 0.266280109  | 0.730983231 | 2.855146989  | 0.005373958 | -2.227925095 |
| RNU6-121P      | 0.462896643  | 0.189342573 | 2.854929685  | 0.005377317 | -2.228443269 |
| RNU4ATAC11P    | 0.28159422   | 0.317123036 | 2.854675212  | 0.005381253 | -2.229050032 |
| RP11-586K12.11 | 0.266601441  | 0.088822165 | 2.85451946   | 0.005383663 | -2.229421387 |
| NCAPG2         | 0.467053866  | 3.036062253 | 2.854446405  | 0.005384794 | -2.229595564 |
| RINT1          | 0.296272134  | 2.812133236 | 2.853839687  | 0.005394194 | -2.231041947 |
| RP11-6B19.3    | 0.253157786  | 0.092686423 | 2.853669063  | 0.005396841 | -2.231448662 |
| RP11-295B17.6  | 0.41246932   | 0.232505492 | 2.853507781  | 0.005399343 | -2.23183309  |
| RNU6-583P      | 0.39011717   | 0.501551507 | 2.853206804  | 0.005404016 | -2.232550444 |
| DAGLB          | -0.315595924 | 2.568614936 | -2.852611196 | 0.005413275 | -2.233969843 |
| BLZF1          | 0.352431319  | 2.863107769 | 2.851974556  | 0.005423187 | -2.235486762 |
| NGEF           | 0.83562901   | 2.052893573 | 2.851616665  | 0.005428767 | -2.236339386 |
| SLC5A11        | 0.24454897   | 0.162749695 | 2.851434103  | 0.005431615 | -2.23677428  |
| RP1-267L14.3   | 0.208275914  | 0.225388473 | 2.850853771  | 0.005440678 | -2.238156582 |

|               |              |             |              |             |              |
|---------------|--------------|-------------|--------------|-------------|--------------|
| RP5-1021I20.7 | 0.382614148  | 0.436794157 | 2.850751098  | 0.005442283 | -2.238401116 |
| NDUFA5P6      | 0.340250613  | 0.178448529 | 2.850240782  | 0.005450267 | -2.23961642  |
| RP11-823P9.4  | 0.418720191  | 0.272944928 | 2.849103551  | 0.005468096 | -2.24232407  |
| SMG7-AS1      | 0.211857502  | 0.243432638 | 2.848754908  | 0.005473573 | -2.243153982 |
| CSTA          | -0.436479846 | 1.158241809 | -2.848538427 | 0.005476976 | -2.243669254 |
| LINC00904     | 0.259482509  | 0.099949595 | 2.847354741  | 0.005495618 | -2.246486121 |
| AC005808.3    | 0.25296442   | 0.1042943   | 2.847227298  | 0.005497629 | -2.246789344 |
| GS1-278J22.1  | 0.290949856  | 0.108726837 | 2.845976837  | 0.005517393 | -2.249763976 |
| GNA14-AS1     | 0.208463906  | 0.170275367 | 2.845722116  | 0.005521427 | -2.250369782 |
| SPCS2         | 0.327131724  | 4.476577919 | 2.845408575  | 0.005526396 | -2.251115423 |
| RNA5SP384     | 0.469511352  | 0.220400116 | 2.845327096  | 0.005527688 | -2.251309177 |
| CTC-431G16.2  | 0.214181934  | 0.126701207 | 2.844995621  | 0.005532947 | -2.252097375 |
| SYCP2         | 0.474770393  | 1.034655907 | 2.844954831  | 0.005533594 | -2.252194362 |
| CDON          | 0.459361384  | 1.395714468 | 2.844546401  | 0.005540081 | -2.253165433 |
| AC134300.1    | 0.308054116  | 0.112274    | 2.843935728  | 0.005549793 | -2.254617138 |
| RN7SL547P     | 0.344909475  | 0.146053653 | 2.843318887  | 0.005559619 | -2.256083247 |
| CTD-2531D15.4 | 0.202392037  | 0.208365665 | 2.842471449  | 0.005573145 | -2.258097021 |
| SNAI3         | -0.275670475 | 0.878669906 | -2.841555355 | 0.0055878   | -2.260273389 |
| AC006160.5    | 0.308466225  | 0.426271484 | 2.841501724  | 0.005588659 | -2.260400783 |
| TIAM2         | 0.441941383  | 1.925206517 | 2.841350899  | 0.005591076 | -2.260759039 |
| RASGRP4       | -0.321607138 | 0.856394785 | -2.841350791 | 0.005591077 | -2.260759295 |
| RP11-91N2.3   | 0.221025043  | 0.135461105 | 2.841063054  | 0.00559569  | -2.261442716 |
| CCDC36        | 0.411323116  | 0.777262148 | 2.840909082  | 0.00559816  | -2.2618084   |
| LINC01272     | -0.358794203 | 0.7324679   | -2.840871358 | 0.005598765 | -2.261897992 |
| RP11-139G7.1  | 0.237134471  | 0.097307184 | 2.840623935  | 0.005602737 | -2.262485584 |
| DZIP1L        | 0.320012816  | 1.098094777 | 2.840303868  | 0.005607878 | -2.263245631 |
| TMEM229A      | 0.298701621  | 0.185660332 | 2.840208083  | 0.005609417 | -2.263473074 |
| CTA-313A17.3  | 0.241775774  | 0.243300742 | 2.839945163  | 0.005613645 | -2.264097347 |
| ARPC4         | -0.39881921  | 4.839837783 | -2.839034459 | 0.005628311 | -2.266259349 |
| RP11-267N12.2 | 0.22277114   | 0.108812634 | 2.838882248  | 0.005630765 | -2.266620641 |
| RP11-487I5.4  | 0.249143186  | 0.157300012 | 2.838256564  | 0.005640866 | -2.268105616 |
| RP11-831F12.3 | 0.228213584  | 0.361039227 | 2.838036688  | 0.005644419 | -2.268627397 |
| RNA5SP222     | 0.368799017  | 0.133883187 | 2.837775067  | 0.00564865  | -2.2692482   |

|              |              |             |              |             |              |
|--------------|--------------|-------------|--------------|-------------|--------------|
| CCDC26       | 0.38539184   | 0.218992026 | 2.837687725  | 0.005650063 | -2.269455443 |
| RP3-510O8.3  | 0.374729788  | 0.215718755 | 2.836804202  | 0.005664375 | -2.271551568 |
| RP1-184J9.2  | 0.227036281  | 0.155557376 | 2.836781311  | 0.005664746 | -2.271605868 |
| RNU6-1077P   | 0.402863988  | 0.169941303 | 2.836771586  | 0.005664904 | -2.271628937 |
| RP11-252E2.2 | 0.229359298  | 0.121345834 | 2.836220954  | 0.005673842 | -2.272935009 |
| AC084357.2   | 0.388764282  | 0.172423344 | 2.835936303  | 0.005678467 | -2.273610105 |
| RENBP        | -0.707942242 | 2.747562653 | -2.835645503 | 0.005683196 | -2.274299728 |
| IDE          | 0.374834876  | 2.270622877 | 2.83548205   | 0.005685855 | -2.274687327 |
| MPP4         | 0.261176655  | 0.24411254  | 2.83493735   | 0.005694726 | -2.27597885  |
| RNU2-3P      | 0.233605635  | 0.102902759 | 2.834721256  | 0.005698249 | -2.276491169 |
| PSMD13       | -0.341685559 | 4.364206543 | -2.834672491 | 0.005699044 | -2.276606777 |
| RP11-24F11.2 | -0.216783205 | 0.398914267 | -2.834046938 | 0.005709255 | -2.278089646 |
| CYP2T3P      | 0.239663022  | 0.153836955 | 2.833125088  | 0.005724332 | -2.280274398 |
| THEMIS2      | -0.525647656 | 2.564445779 | -2.832439335 | 0.005735572 | -2.281899234 |
| NLRP7        | 0.209973289  | 0.100133971 | 2.83202258   | 0.005742412 | -2.282886543 |
| KCNQ5-AS1    | 0.248024138  | 0.131157807 | 2.831780094  | 0.005746396 | -2.283460948 |
| SRRM2        | 0.339122044  | 4.85758781  | 2.831267326  | 0.005754828 | -2.28467547  |
| PISD         | -0.288820045 | 2.239418549 | -2.830304761 | 0.005770688 | -2.286954878 |
| AC064834.3   | 0.281600767  | 0.129606696 | 2.829124692  | 0.005790185 | -2.289748485 |
| SPARCL1      | -0.623419517 | 3.48551826  | -2.828249045 | 0.005804692 | -2.291820811 |
| KCND2        | 0.220013151  | 0.149081879 | 2.827671982  | 0.005814271 | -2.293186217 |
| AC069257.8   | 0.206436377  | 0.323775038 | 2.827359277  | 0.005819467 | -2.293926023 |
| SIK2         | 0.344443839  | 2.490605908 | 2.82690574   | 0.005827012 | -2.294998892 |
| RNU6-436P    | 0.337070618  | 0.217294321 | 2.826891491  | 0.005827249 | -2.295032598 |
| DIS3         | 0.358481341  | 2.350047068 | 2.826415756  | 0.005835173 | -2.296157823 |
| HMG2P28      | 0.227266772  | 0.507362013 | 2.82566723   | 0.00584766  | -2.29792795  |
| AC008982.2   | 0.357733188  | 0.889277787 | 2.824374702  | 0.00586928  | -2.300983642 |
| RP11-70D24.2 | -0.284799758 | 0.620692703 | -2.824330058 | 0.005870028 | -2.301089166 |
| RP11-425M5.8 | 0.276038531  | 0.119657004 | 2.823518142  | 0.005883648 | -2.303008025 |
| PFDN5        | -0.478955082 | 5.512892071 | -2.823168283 | 0.005889526 | -2.303834733 |
| GOLGA2       | 0.358016515  | 3.928032337 | 2.823006533  | 0.005892245 | -2.304216917 |
| DCUN1D2-AS   | 0.340650879  | 0.530794296 | 2.822634173  | 0.00589851  | -2.30509666  |
| CTD-2306M5.1 | 0.220952856  | 0.09307486  | 2.822271744  | 0.005904613 | -2.30595285  |

|               |              |             |              |             |              |
|---------------|--------------|-------------|--------------|-------------|--------------|
| RP11-503E24.2 | 0.343371459  | 0.689248619 | 2.821580289  | 0.005916273 | -2.307586072 |
| USP12-AS2     | 0.341950674  | 0.44568708  | 2.81969936   | 0.005948098 | -2.312027184 |
| REEP6         | -0.415514472 | 1.260252871 | -2.819020889 | 0.005959616 | -2.313628547 |
| RNU7-57P      | 0.215771379  | 0.069574741 | 2.819019286  | 0.005959643 | -2.31363233  |
| RP11-118M9.3  | 0.225741874  | 0.299647788 | 2.818939427  | 0.005961    | -2.313820797 |
| CTC-430J12.2  | 0.208275893  | 0.099169733 | 2.818850502  | 0.005962512 | -2.314030653 |
| UBE2V1P4      | 0.277912004  | 0.111633849 | 2.818408638  | 0.005970028 | -2.315073344 |
| KDM6A         | 0.364145976  | 2.361403753 | 2.818339167  | 0.00597121  | -2.315237266 |
| AC011233.2    | 0.268131222  | 0.084805857 | 2.818338059  | 0.005971229 | -2.31523988  |
| RP11-110I1.11 | 0.488554861  | 1.553330628 | 2.816566896  | 0.006001447 | -2.319417961 |
| CTD-2312P21.1 | 0.224979787  | 0.217467    | 2.816561943  | 0.006001532 | -2.319429641 |
| ASPM          | 0.460389408  | 2.481930703 | 2.816185797  | 0.006007968 | -2.320316673 |
| QDPR          | -0.419480116 | 3.22950234  | -2.815757663 | 0.006015301 | -2.321326185 |
| RP11-1090M7.3 | 0.392991475  | 0.429489699 | 2.815690533  | 0.006016451 | -2.321484461 |
| NLRC4         | -0.224557622 | 0.784679324 | -2.815429398 | 0.006020928 | -2.322100126 |
| ATP6V0A4      | 0.200671251  | 0.108244061 | 2.815136034  | 0.006025962 | -2.322791721 |
| RNU6-996P     | 0.256349409  | 0.102481796 | 2.81512674   | 0.006026122 | -2.322813631 |
| STXBP1        | 0.440280253  | 3.135794712 | 2.814661123  | 0.006034119 | -2.323911182 |
| RPL10AP1      | 0.324305967  | 0.66615693  | 2.814150817  | 0.006042895 | -2.325113904 |
| RP5-1057J7.7  | 0.432800571  | 1.019513961 | 2.813708032  | 0.006050519 | -2.326157342 |
| RPS6KA5       | 0.228764212  | 0.450406166 | 2.813650366  | 0.006051513 | -2.326293225 |
| RNA5SP227     | 0.476868752  | 0.310190938 | 2.811641951  | 0.006086212 | -2.331024362 |
| NDUFA9        | -0.403371866 | 2.345008024 | -2.811431673 | 0.006089855 | -2.331519545 |
| COG6          | 0.307537681  | 1.865976724 | 2.811343438  | 0.006091385 | -2.33172732  |
| RP11-458I7.1  | 0.335241236  | 0.41946415  | 2.81064087   | 0.006103575 | -2.333381535 |
| NPM1P26       | 0.21797651   | 0.452723689 | 2.810582658  | 0.006104586 | -2.333518582 |
| AC018867.1    | 0.399288273  | 0.354276293 | 2.809968416  | 0.006115264 | -2.334964528 |
| KIAA0930      | -0.424263713 | 3.456685508 | -2.809383143 | 0.006125454 | -2.33634204  |
| MIR4530       | 0.278090067  | 0.288705848 | 2.808097153  | 0.0061479   | -2.339367951 |
| ITGAL         | -0.410862646 | 0.929827396 | -2.807804255 | 0.006153022 | -2.340056974 |
| CD8A          | -0.566536526 | 0.715062267 | -2.807748516 | 0.006153998 | -2.34018809  |
| MIR5584       | 0.207764416  | 0.081543905 | 2.807437655  | 0.006159439 | -2.340919297 |
| APOL2         | -0.482099592 | 3.907012045 | -2.8073982   | 0.00616013  | -2.341012099 |

|               |              |             |              |             |              |
|---------------|--------------|-------------|--------------|-------------|--------------|
| RP11-177A2.5  | 0.213667675  | 0.218000673 | 2.807382629  | 0.006160403 | -2.341048722 |
| PKLR          | 0.272309262  | 0.191406988 | 2.807322329  | 0.006161459 | -2.34119055  |
| RN7SL376P     | 0.416707823  | 0.26544539  | 2.807041694  | 0.006166377 | -2.341850579 |
| IFNGR1        | -0.351151691 | 4.225060279 | -2.806881718 | 0.006169183 | -2.342226805 |
| SMAD4         | 0.293370632  | 2.69052458  | 2.806879103  | 0.006169228 | -2.342232955 |
| RAD1          | 0.28468011   | 2.378583407 | 2.8067953    | 0.006170698 | -2.342430032 |
| MGMT          | -0.506233554 | 2.35435789  | -2.806739968 | 0.006171669 | -2.342560152 |
| RP11-554A11.9 | 0.234397606  | 0.199846657 | 2.806118976  | 0.006182573 | -2.344020352 |
| RAD51AP1P1    | 0.225258922  | 0.119943458 | 2.806065122  | 0.006183519 | -2.34414697  |
| MTND4P20      | 0.206866791  | 0.074029997 | 2.805917187  | 0.00618612  | -2.344494782 |
| RP11-876N24.3 | -0.24577639  | 0.758572915 | -2.805534779 | 0.006192847 | -2.345393789 |
| RPS6P8        | 0.287058315  | 0.229241177 | 2.80545448   | 0.00619426  | -2.345582553 |
| RP11-745A24.3 | 0.263069392  | 0.112355175 | 2.804352706  | 0.006213683 | -2.348172108 |
| CSGALNACT2    | 0.443877847  | 3.484659839 | 2.804080488  | 0.006218491 | -2.348811787 |
| RP11-393K12.4 | 0.453164324  | 0.185120766 | 2.804005252  | 0.00621982  | -2.348988575 |
| HECTD4        | 0.282632668  | 1.687345782 | 2.803782698  | 0.006223754 | -2.349511502 |
| AP001429.1    | 0.218935559  | 0.40978398  | 2.802098352  | 0.006253599 | -2.353468037 |
| MYL6          | -0.43805652  | 6.679007403 | -2.801241592 | 0.00626883  | -2.355479824 |
| LINC01151     | 0.561083519  | 0.225693973 | 2.800942198  | 0.006274161 | -2.35618272  |
| CHKB          | -0.251231047 | 0.786497304 | -2.800855865 | 0.006275699 | -2.356385396 |
| HMGB1P8       | 0.294006897  | 0.365976696 | 2.800177506  | 0.006287794 | -2.357977737 |
| HIGD2B        | 0.220961824  | 0.118709882 | 2.799558169  | 0.006298856 | -2.359431255 |
| AL355098.1    | 0.509817959  | 0.211353741 | 2.799438599  | 0.006300994 | -2.359711844 |
| RBX1          | -0.383459845 | 4.271419454 | -2.798894332 | 0.006310733 | -2.36098892  |
| RP1-40E16.2   | 0.2460278    | 0.158479774 | 2.798788018  | 0.006312637 | -2.36123835  |
| CARD16        | -0.593985841 | 1.734636612 | -2.798107083 | 0.006324844 | -2.36283577  |
| RN7SL269P     | 0.258760751  | 0.500103929 | 2.798041172  | 0.006326027 | -2.362990375 |
| RP11-310E22.4 | 0.220064851  | 0.242694904 | 2.797992367  | 0.006326903 | -2.363104854 |
| AP000345.1    | 0.207638966  | 0.092682037 | 2.797301405  | 0.006339316 | -2.364725416 |
| RP11-627G18.4 | 0.34390393   | 0.138112654 | 2.797115109  | 0.006342666 | -2.365162292 |
| HMG1P34       | 0.305343521  | 0.14143168  | 2.797093782  | 0.00634305  | -2.365212303 |
| RP11-412H8.2  | 0.220438852  | 0.083589284 | 2.796205004  | 0.006359058 | -2.367296208 |
| AL138935.1    | 0.265840466  | 0.096881202 | 2.796195802  | 0.006359224 | -2.367317781 |

|                |              |             |              |             |              |
|----------------|--------------|-------------|--------------|-------------|--------------|
| RPL21P1        | 0.39629354   | 0.694907606 | 2.795153019  | 0.006378053 | -2.369762078 |
| RNU6-741P      | 0.278274275  | 0.132217451 | 2.795119451  | 0.00637866  | -2.369840751 |
| RP11-63A23.2   | 0.318928575  | 0.125491931 | 2.794819422  | 0.006384088 | -2.370543877 |
| AMZ2P2         | 0.235654526  | 0.116764832 | 2.794220999  | 0.006394926 | -2.371946115 |
| XRCC2          | 0.361073616  | 1.77061234  | 2.794060114  | 0.006397842 | -2.372323061 |
| OGFRL1         | -0.384406766 | 2.133366353 | -2.794038198 | 0.00639824  | -2.37237441  |
| RP3-380B8.4    | 0.396923462  | 0.169246912 | 2.793859722  | 0.006401477 | -2.372792548 |
| RP5-1077B9.5   | 0.391717112  | 0.217208407 | 2.79372609   | 0.006403902 | -2.37310561  |
| RP11-708H21.1  | 0.226894214  | 0.135377705 | 2.793707867  | 0.006404232 | -2.373148301 |
| RP11-10G12.2   | 0.273819777  | 0.14755234  | 2.792477259  | 0.006426602 | -2.37603068  |
| RN7SL371P      | 0.417758475  | 0.15795426  | 2.792420571  | 0.006427635 | -2.37616343  |
| RP13-270P17.2  | 0.201255132  | 0.594216891 | 2.792254573  | 0.006430658 | -2.376552151 |
| RN7SL847P      | 0.229437395  | 0.114723199 | 2.792215744  | 0.006431366 | -2.376643076 |
| RP11-62C3.6    | 0.332354792  | 0.22816279  | 2.791245229  | 0.00644907  | -2.378915345 |
| CLIC2          | -0.439829286 | 1.326302719 | -2.791144553 | 0.006450909 | -2.379151021 |
| RP5-867C24.5   | 0.26569915   | 0.344002809 | 2.790803665  | 0.00645714  | -2.379948966 |
| RNU6-906P      | 0.318936783  | 0.130349824 | 2.790520369  | 0.006462322 | -2.380612039 |
| RAD23A         | 0.419203818  | 5.366079115 | 2.790383356  | 0.00646483  | -2.380932708 |
| CTD-2356P16.6  | 0.254860619  | 0.095736737 | 2.790311584  | 0.006466144 | -2.381100681 |
| SIT1           | -0.341519335 | 0.500661504 | -2.789873947 | 0.006474162 | -2.382124829 |
| CATSPERD       | 0.233850737  | 0.128992197 | 2.789832711  | 0.006474918 | -2.38222132  |
| PTAR1          | 0.391947363  | 2.317674166 | 2.789692974  | 0.00647748  | -2.382548297 |
| ZNF609         | 0.294164304  | 2.412422152 | 2.789348745  | 0.006483795 | -2.383353719 |
| RP11-216L13.21 | 0.213766371  | 0.33311821  | 2.788247449  | 0.006504039 | -2.385929966 |
| RP11-1C8.5     | 0.210389361  | 0.116142969 | 2.788109398  | 0.006506581 | -2.386252846 |
| RP11-469J4.3   | 0.241741845  | 0.217944843 | 2.787757395  | 0.006513065 | -2.387076072 |
| ABHD14A        | -0.36800178  | 2.401729587 | -2.786813491 | 0.006530484 | -2.38928315  |
| CLEC10A        | -0.295611778 | 0.520853247 | -2.786479093 | 0.006536665 | -2.390064906 |
| TPT1P1         | 0.356877871  | 0.669508257 | 2.785907709  | 0.006547239 | -2.391400513 |
| PPP6R3         | 0.27407119   | 3.296802201 | 2.78548832   | 0.00655501  | -2.392380687 |
| LINC00603      | 0.224825461  | 0.104369355 | 2.785356445  | 0.006557455 | -2.392688875 |
| RNU6-180P      | 0.332728765  | 0.117203867 | 2.78442395   | 0.00657477  | -2.394867738 |
| PDS5B          | 0.271190947  | 1.937165254 | 2.783457706  | 0.006592756 | -2.397124825 |

|                |              |             |              |             |              |
|----------------|--------------|-------------|--------------|-------------|--------------|
| RNU6-1340P     | 0.211673882  | 0.138809882 | 2.783353754  | 0.006594694 | -2.397367615 |
| ARFGAP2        | -0.310894753 | 3.637500526 | -2.783169039 | 0.006598138 | -2.39779901  |
| RP11-454H13.1  | 0.237346909  | 0.258587352 | 2.782749018  | 0.006605976 | -2.398779871 |
| RP11-439E19.7  | 0.22896059   | 0.139586081 | 2.782667067  | 0.006607507 | -2.398971233 |
| RP11-358M3.1   | 0.318066669  | 0.148769116 | 2.782573149  | 0.006609261 | -2.399190535 |
| RP11-541P9.3   | 0.21702392   | 0.105448987 | 2.782131449  | 0.006617517 | -2.400221837 |
| RP11-678K21.2  | 0.201866575  | 0.080079838 | 2.781538236  | 0.006628619 | -2.401606685 |
| SOX2OT_exon4   | 0.327286824  | 0.098992208 | 2.781529461  | 0.006628783 | -2.40162717  |
| MIR128-1       | 0.337740574  | 0.158408208 | 2.781328903  | 0.006632541 | -2.402095315 |
| HCG20          | 0.200575338  | 0.138098321 | 2.780547957  | 0.006647191 | -2.40391794  |
| AC005540.3     | 0.246687005  | 0.411617646 | 2.780339259  | 0.006651111 | -2.404404945 |
| FAM160A1       | 0.289375389  | 0.69082263  | 2.780052646  | 0.006656498 | -2.405073717 |
| ATR            | 0.255657066  | 1.530568412 | 2.779510527  | 0.006666698 | -2.40633852  |
| BNIP3          | 0.681229468  | 3.645718016 | 2.778617402  | 0.006683533 | -2.408421804 |
| IFNL3P1        | 0.265024519  | 0.099744283 | 2.778609275  | 0.006683687 | -2.408440758 |
| RP5-837I24.6   | 0.204693072  | 0.10710948  | 2.778479366  | 0.006686139 | -2.408743735 |
| ECT2           | 0.368929825  | 2.580574377 | 2.778385     | 0.00668792  | -2.408963809 |
| CTD-2010I22.2  | 0.255647479  | 0.118118587 | 2.77802522   | 0.006694717 | -2.409802812 |
| CCDC186        | 0.2929593    | 1.405752768 | 2.777967372  | 0.006695811 | -2.409937703 |
| MIR3926-2      | 0.241181222  | 0.165238414 | 2.776840011  | 0.006717153 | -2.412566073 |
| CCDC124        | -0.397924694 | 5.03472601  | -2.776351761 | 0.006726415 | -2.413704122 |
| RP11-404L6.2   | 0.233104467  | 0.09298611  | 2.776233531  | 0.00672866  | -2.413979677 |
| CTD-2005H7.1   | 0.225576513  | 0.166782121 | 2.775793208  | 0.006737026 | -2.415005838 |
| RWDD3          | -0.313966974 | 2.073558732 | -2.775625082 | 0.006740223 | -2.415397618 |
| CTD-2192J16.21 | 0.380513118  | 0.490865735 | 2.775520342  | 0.006742215 | -2.41564168  |
| RN7SL223P      | 0.215097023  | 0.081455248 | 2.775108737  | 0.006750049 | -2.416600714 |
| CYTH4          | -0.610291109 | 2.277569948 | -2.775098096 | 0.006750252 | -2.416625508 |
| RP11-115D7.3   | 0.334348989  | 0.537973813 | 2.775070474  | 0.006750778 | -2.41668986  |
| DRD2           | 0.289285691  | 0.358578115 | 2.775024996  | 0.006751644 | -2.416795818 |
| CTD-2377D24.4  | 0.220146472  | 0.153544378 | 2.774907161  | 0.006753889 | -2.417070342 |
| DPRXP2         | 0.271106208  | 0.182007754 | 2.774770568  | 0.006756492 | -2.417388559 |
| RN7SKP33       | 0.202333938  | 0.067420859 | 2.774645692  | 0.006758872 | -2.417679467 |
| RBP7           | -0.545815744 | 1.85430263  | -2.774644423 | 0.006758897 | -2.417682423 |

|                |              |             |              |             |              |
|----------------|--------------|-------------|--------------|-------------|--------------|
| AL355490.1     | 0.304274112  | 0.26974174  | 2.774608519  | 0.006759581 | -2.417766062 |
| RP11-428P16.3  | 0.233903615  | 0.104837094 | 2.774271044  | 0.006766019 | -2.418552171 |
| RNU6-179P      | 0.352946402  | 0.216471341 | 2.774255913  | 0.006766308 | -2.418587415 |
| RP11-344N10.2  | 0.335136259  | 0.393832663 | 2.77416432   | 0.006768056 | -2.418800758 |
| MYCBP2         | 0.370624957  | 2.181291628 | 2.774009415  | 0.006771014 | -2.419161554 |
| CTD-2568A17.1  | 0.326977861  | 0.381141624 | 2.773981438  | 0.006771548 | -2.419226715 |
| EIF4G1         | 0.260635165  | 5.738826453 | 2.772355348  | 0.00680267  | -2.423013082 |
| RPS26P5        | 0.45773654   | 0.184059163 | 2.772134421  | 0.006806909 | -2.423527372 |
| RPL21P23       | 0.240928219  | 0.142432484 | 2.771547199  | 0.006818186 | -2.424894187 |
| CACYBPP1       | 0.238933359  | 0.229618469 | 2.770993536  | 0.006828834 | -2.42618267  |
| FAM72D         | 0.218476237  | 0.765863388 | 2.770622862  | 0.006835972 | -2.427045185 |
| RP13-20L14.10  | 0.262841093  | 0.604529073 | 2.770063317  | 0.00684676  | -2.428346998 |
| CYCSP11        | 0.264277243  | 0.12416634  | 2.769324678  | 0.006861024 | -2.430065155 |
| AC018643.4     | 0.290076799  | 0.114643813 | 2.769155989  | 0.006864285 | -2.430457492 |
| TCF7L1         | -0.527019672 | 2.819074022 | -2.7689252   | 0.006868749 | -2.430994227 |
| RP11-496B10.3  | 0.388028676  | 0.240057039 | 2.768873417  | 0.006869751 | -2.431114653 |
| DPRXP5         | 0.307495862  | 0.150724609 | 2.76883069   | 0.006870578 | -2.431214015 |
| RP11-141I7.2   | 0.317058748  | 0.313446395 | 2.768542619  | 0.006876156 | -2.431883899 |
| TMEM14C        | -0.345741663 | 5.640482386 | -2.768329597 | 0.006880283 | -2.432379227 |
| TRAV15         | 0.224648476  | 0.104488066 | 2.767084766  | 0.006904445 | -2.435273133 |
| S100A4         | -0.763534504 | 7.599231741 | -2.767013986 | 0.006905821 | -2.435437645 |
| RN7SKP269      | 0.31369203   | 0.518865284 | 2.766928784  | 0.006907478 | -2.435635674 |
| AGAP1          | 0.334026737  | 2.063729821 | 2.766831614  | 0.006909368 | -2.435861514 |
| AP000275.64    | 0.266971201  | 0.119631536 | 2.765983316  | 0.006925889 | -2.437832822 |
| RAPH1          | 0.263769626  | 0.673568697 | 2.765402648  | 0.006937219 | -2.439181914 |
| PCA3_1         | 0.204658952  | 0.200827862 | 2.765267109  | 0.006939865 | -2.439496783 |
| RP11-357H14.16 | 0.332035545  | 0.253516306 | 2.764236204  | 0.006960028 | -2.44189126  |
| SLC12A8        | 0.466190347  | 1.506393179 | 2.763756154  | 0.006969435 | -2.443006019 |
| PIAS2          | 0.269279175  | 1.389738111 | 2.763492729  | 0.006974603 | -2.443617669 |
| RP11-356M20.1  | 0.201829565  | 0.121335666 | 2.763398117  | 0.006976459 | -2.443837339 |
| RNU6-223P      | 0.647140641  | 0.246183722 | 2.763337065  | 0.006977658 | -2.443979085 |
| RPL21P24       | 0.302842449  | 0.135180329 | 2.763179823  | 0.006980745 | -2.444344147 |
| CTC-508F8.1    | 0.445111467  | 0.502320472 | 2.763005799  | 0.006984163 | -2.444748151 |



|                |             |             |              |             |              |
|----------------|-------------|-------------|--------------|-------------|--------------|
| RP11-278C7.5   | -0.28737173 | 0.731659197 | -2.762411474 | 0.006995848 | -2.446127747 |
| CTC-459M5.1    | 0.236398789 | 0.135838187 | 2.762285274  | 0.006998332 | -2.446420662 |
| CTD-2139B15.5  | 0.312636269 | 0.160802076 | 2.762104326  | 0.007001894 | -2.446840628 |
| MIR3147        | 0.25266856  | 0.150570283 | 2.761995749  | 0.007004033 | -2.447092616 |
| RP11-122F24.1  | 0.222630669 | 0.125797525 | 2.761256611  | 0.007018605 | -2.448807809 |
| AC092675.3     | 0.26369535  | 0.170896753 | 2.761093676  | 0.007021822 | -2.449185853 |
| CTD-2329K10.1  | 0.41015164  | 0.692455004 | 2.760575911  | 0.007032051 | -2.450387061 |
| KAT6A          | 0.362406762 | 2.462080474 | 2.760070933  | 0.00704204  | -2.451558421 |
| RP11-274B21.14 | 0.352390849 | 1.201249335 | 2.76004655   | 0.007042523 | -2.451614976 |
| AC027612.1     | 0.305065241 | 0.502283594 | 2.759944638  | 0.007044541 | -2.451851352 |
| CENPF          | 0.448905778 | 3.036929616 | 2.759749339  | 0.007048409 | -2.452304308 |
| MSNP1          | 0.330279956 | 1.168165136 | 2.759346829  | 0.007056387 | -2.453237766 |
| RP11-166J22.1  | 0.2470838   | 0.134781952 | 2.758506884  | 0.007073063 | -2.455185316 |
| TNFRSF14       | -0.48962118 | 2.658467194 | -2.757151976 | 0.007100038 | -2.458325858 |
| RP11-426L16.3  | 0.285293762 | 0.383213413 | 2.7569615    | 0.007103838 | -2.458767261 |
| RP11-159F24.3  | 0.228141967 | 0.603329462 | 2.756647838  | 0.007110099 | -2.459494078 |
| RP3-499B10.3   | 0.278023819 | 0.121503134 | 2.756073083  | 0.007121585 | -2.460825719 |
| RP11-466I1.1   | 0.217336577 | 0.088640276 | 2.755885785  | 0.007125332 | -2.461259615 |
| CTC-535M15.1   | 0.342438479 | 0.221482291 | 2.755782497  | 0.007127398 | -2.461498884 |
| AC093270.1     | 0.27966904  | 0.102215766 | 2.755746     | 0.007128129 | -2.461583428 |
| RP11-63E16.1   | 0.300783604 | 0.289266619 | 2.754962355  | 0.00714383  | -2.463398499 |
| RGS22          | 0.358971492 | 0.567065209 | 2.754124363  | 0.007160655 | -2.465338973 |
| NPM1P43        | 0.219165242 | 0.144213644 | 2.753980369  | 0.00716355  | -2.465672359 |
| GAS2L3         | 0.340189931 | 2.116305248 | 2.75207125   | 0.00720203  | -2.470091154 |
| AL049871.1     | 0.265965834 | 0.191733785 | 2.752046861  | 0.007202523 | -2.470147588 |
| ZDHHC20P3      | 0.255179328 | 0.097753234 | 2.751981789  | 0.007203838 | -2.470298158 |
| RN7SL843P      | 0.222988575 | 0.106506866 | 2.751802892  | 0.007207454 | -2.470712086 |
| C5             | 0.271697023 | 0.817126418 | 2.751514778  | 0.007213281 | -2.471378675 |
| ACER2          | 0.214112109 | 0.510245946 | 2.751473727  | 0.007214112 | -2.471473647 |
| ZNF221         | 0.293450539 | 1.10062389  | 2.751322718  | 0.007217169 | -2.471822997 |
| MIR1254-1      | 0.591142872 | 1.672917713 | 2.751322621  | 0.007217171 | -2.471823222 |
| RP11-1127D7.1  | 0.200229216 | 0.083123634 | 2.750599265  | 0.007231828 | -2.473496446 |
| AC022616.1     | 0.278850198 | 0.089002461 | 2.75052291   | 0.007233376 | -2.473673046 |

|               |              |             |              |             |              |
|---------------|--------------|-------------|--------------|-------------|--------------|
| BRCA2         | 0.234683863  | 1.007586176 | 2.749781622  | 0.007248428 | -2.475387333 |
| RP4-785G19.2  | 0.271436165  | 0.688209423 | 2.749712907  | 0.007249825 | -2.475546222 |
| RP11-383C6.2  | 0.318295906  | 0.222810603 | 2.749495824  | 0.007254239 | -2.476048161 |
| A2ML1-AS2     | 0.305493666  | 0.133526122 | 2.749390586  | 0.00725638  | -2.476291482 |
| RIF1          | 0.327955669  | 2.226400192 | 2.749282431  | 0.00725858  | -2.476541537 |
| RNU6ATAC29P   | 0.396742349  | 0.202754305 | 2.748123934  | 0.007282191 | -2.479219488 |
| AL121933.1    | 0.382161911  | 0.156433759 | 2.747715975  | 0.007290522 | -2.480162296 |
| MON2          | 0.254071979  | 2.026306939 | 2.747455399  | 0.007295847 | -2.480764433 |
| RNU7-48P      | 0.530155911  | 0.333561403 | 2.746860462  | 0.00730802  | -2.482139037 |
| CEACAM21      | -0.227659519 | 0.48761943  | -2.746758826 | 0.007310102 | -2.482373841 |
| VN1R10P       | 0.217928411  | 0.095038464 | 2.746616557  | 0.007313016 | -2.482702508 |
| RNA5SP26      | 0.30151592   | 0.109407013 | 2.746439597  | 0.007316643 | -2.483111298 |
| AC078899.1    | 0.295032885  | 1.074176233 | 2.746426846  | 0.007316904 | -2.483140752 |
| DEFB118       | 0.207293694  | 0.081396678 | 2.746059895  | 0.00732443  | -2.48398836  |
| SPOPL         | 0.298483355  | 1.958079606 | 2.746044562  | 0.007324745 | -2.484023775 |
| PSENN         | -0.396701825 | 4.0413378   | -2.746014213 | 0.007325367 | -2.484093874 |
| RPL32P33      | 0.27991451   | 0.337977777 | 2.745581628  | 0.007334249 | -2.485092954 |
| AC104841.1    | 0.557430838  | 1.08652042  | 2.745564146  | 0.007334608 | -2.485133325 |
| RNU6-1156P    | 0.250724797  | 0.153238987 | 2.745498795  | 0.007335951 | -2.485284246 |
| LINC01359     | 0.214179999  | 0.180321758 | 2.745243991  | 0.007341189 | -2.485872656 |
| RP11-419I17.1 | 0.218009059  | 0.235873446 | 2.745154535  | 0.007343028 | -2.486079221 |
| CTD-2296D1.1  | 0.219036858  | 0.072226299 | 2.744545148  | 0.007355571 | -2.487486234 |
| RNU6-556P     | 0.334898781  | 0.157463981 | 2.744317885  | 0.007360253 | -2.488010895 |
| RP11-213G2.5  | 0.218037215  | 0.166086494 | 2.744247562  | 0.007361703 | -2.488173236 |
| APOL1         | -0.854990007 | 3.431655102 | -2.744217382 | 0.007362325 | -2.488242907 |
| RP4-583P15.16 | 0.270090672  | 0.45886295  | 2.744210745  | 0.007362462 | -2.488258227 |
| FAM111B       | 0.556709613  | 2.358141837 | 2.744101773  | 0.007364708 | -2.488509779 |
| CTC-774J1.1   | 0.248665336  | 0.104047573 | 2.743865802  | 0.007369576 | -2.489054472 |
| ISCA2         | -0.252942027 | 2.099793634 | -2.743534493 | 0.007376415 | -2.489819167 |
| MBNL2         | 0.418386691  | 3.079636525 | 2.743512945  | 0.00737686  | -2.489868899 |
| PIWIL4        | 0.248955781  | 0.632195966 | 2.742075814  | 0.007406595 | -2.493185037 |
| MEX3C         | 0.264047823  | 2.409455457 | 2.742037913  | 0.00740738  | -2.493272472 |
| RNU6-603P     | 0.321978315  | 0.137194872 | 2.741979987  | 0.007408581 | -2.493406104 |

|                |              |             |              |             |              |
|----------------|--------------|-------------|--------------|-------------|--------------|
| RN7SL426P      | 0.404155308  | 0.302347466 | 2.741751739  | 0.007413315 | -2.493932631 |
| PFN1           | -0.385188348 | 8.43650457  | -2.741441081 | 0.007419762 | -2.494649208 |
| NUTF2          | -0.356904331 | 4.555919746 | -2.739567302 | 0.007458759 | -2.498969917 |
| TNIK           | 0.390877038  | 1.89810083  | 2.739413648  | 0.007461965 | -2.499324115 |
| RP11-177N22.3  | 0.267100156  | 0.177307073 | 2.73750055   | 0.007501989 | -2.503732765 |
| TBXAS1         | -0.467096075 | 1.829191688 | -2.736831855 | 0.007516024 | -2.505273143 |
| TIPARP         | 0.405590152  | 2.87172957  | 2.736641408  | 0.007520026 | -2.505711793 |
| ZNF236         | 0.251051436  | 1.276881555 | 2.735889477  | 0.007535845 | -2.507443437 |
| RP11-393N4.1   | 0.279022837  | 0.107823739 | 2.735494659  | 0.007544164 | -2.508352519 |
| MYO3B          | 0.313014106  | 0.347618083 | 2.734432561  | 0.007566582 | -2.510797495 |
| RNU6-709P      | 0.220637994  | 0.068539594 | 2.734288477  | 0.007569628 | -2.511129119 |
| SMAD6          | 0.704268666  | 3.186536183 | 2.733366548  | 0.007589145 | -2.513250695 |
| NDUFA3P1       | 0.284827036  | 0.341158869 | 2.732803928  | 0.007601077 | -2.514545126 |
| RP11-545M17.2  | 0.249510158  | 0.44625359  | 2.73245358   | 0.007608516 | -2.515351065 |
| FAM222A-AS1    | 0.317044243  | 0.405649635 | 2.731731932  | 0.007623861 | -2.517010875 |
| RP11-1018N14.2 | 0.304827552  | 0.116018621 | 2.730969528  | 0.007640102 | -2.518764031 |
| RP11-357N13.1  | 0.303633127  | 0.444017889 | 2.730891769  | 0.00764176  | -2.518942816 |
| HDAC4          | 0.29353681   | 1.439937054 | 2.730867961  | 0.007642268 | -2.518997554 |
| SDCCAG3P1      | 0.215872659  | 0.152150817 | 2.730641156  | 0.007647107 | -2.519519    |
| RNA5SP207      | 0.420317188  | 0.257419233 | 2.730570299  | 0.007648619 | -2.5196819   |
| RNU4-6P        | 0.392068595  | 0.166436057 | 2.73013268   | 0.007657966 | -2.520687905 |
| DZIP1          | 0.434875835  | 2.353353363 | 2.729313421  | 0.007675491 | -2.522570872 |
| RP1-166H1.2    | 0.287509252  | 0.104097523 | 2.729113872  | 0.007679765 | -2.523029439 |
| ANKRD36C       | 0.220330817  | 0.528921215 | 2.729019596  | 0.007681785 | -2.523246077 |
| RNU6-502P      | 0.718034744  | 0.291766715 | 2.728987338  | 0.007682476 | -2.523320201 |
| MRPL49P1       | 0.310181513  | 0.108084162 | 2.728708984  | 0.007688444 | -2.523959795 |
| LINC00943      | 0.206200575  | 0.183013165 | 2.728597926  | 0.007690826 | -2.524214964 |
| CTSL           | -0.538380723 | 5.383141326 | -2.728101356 | 0.007701486 | -2.525355794 |
| NSA2           | -0.38528968  | 3.723737908 | -2.727972536 | 0.007704253 | -2.52565172  |
| AC002306.1     | 0.226914597  | 0.192425149 | 2.727928554  | 0.007705198 | -2.525752753 |
| RNU6-155P      | 0.304360112  | 0.169969189 | 2.727790846  | 0.007708158 | -2.526069079 |
| RNU11-3P       | 0.30004531   | 0.28932736  | 2.727505462  | 0.007714295 | -2.526724586 |
| USP31          | 0.227443107  | 1.412037958 | 2.727407256  | 0.007716408 | -2.526950145 |

|                 |              |             |              |             |              |
|-----------------|--------------|-------------|--------------|-------------|--------------|
| RP11-1094M14.14 | 0.338668449  | 0.16801955  | 2.726115372  | 0.007744252 | -2.529916713 |
| RP11-295K2.3    | 0.344876788  | 0.325751121 | 2.72608915   | 0.007744818 | -2.529976917 |
| CTD-2200P10.3   | 0.256187332  | 0.10241652  | 2.725913775  | 0.007748605 | -2.530379538 |
| IL2RA           | -0.312163488 | 0.53673658  | -2.725782146 | 0.007751449 | -2.530681716 |
| RP11-15M15.2    | 0.27491779   | 0.20160585  | 2.725326914  | 0.007761291 | -2.531726688 |
| AC091178.2      | 0.331145376  | 0.197545264 | 2.725029879  | 0.007767718 | -2.532408446 |
| MIR515-2        | 0.226100226  | 0.070121176 | 2.724955622  | 0.007769326 | -2.53257887  |
| RP11-589N15.1   | 0.25135252   | 0.146827797 | 2.724585219  | 0.00777735  | -2.533428918 |
| AF001548.5      | -0.430949701 | 1.499830086 | -2.724227755 | 0.007785101 | -2.53424918  |
| AC091487.1      | 0.303365495  | 0.106475708 | 2.724111355  | 0.007787626 | -2.534516261 |
| RB1CC1          | 0.42444586   | 3.368442821 | 2.7234116    | 0.007802823 | -2.536121651 |
| RP11-298J20.4   | 0.475805691  | 1.300606122 | 2.723175813  | 0.00780795  | -2.536662522 |
| AC073316.2      | 0.340246536  | 0.137290119 | 2.723056749  | 0.00781054  | -2.536935627 |
| AL645937.1      | 0.221291956  | 0.065381714 | 2.722163232  | 0.007830002 | -2.538984833 |
| ARL6IP5         | -0.366588342 | 5.66481831  | -2.721650642 | 0.007841187 | -2.540160165 |
| RP11-55L4.1     | 0.261695993  | 0.153849947 | 2.721610173  | 0.007842071 | -2.54025295  |
| NUGGC           | 0.22199446   | 0.212324401 | 2.721401585  | 0.007846627 | -2.540731168 |
| RPL21P106       | 0.232233166  | 0.212586362 | 2.720840563  | 0.007858893 | -2.542017243 |
| AC018512.1      | 0.711967153  | 0.836082161 | 2.719815933  | 0.007881341 | -2.544365514 |
| DLG1-AS1        | 0.23706676   | 0.099394115 | 2.719700607  | 0.007883871 | -2.544629775 |
| RNA5SP443       | 0.271156197  | 0.133340295 | 2.719179137  | 0.007895321 | -2.54582457  |
| AC151960.1      | 0.22922811   | 0.097574489 | 2.718619865  | 0.007907618 | -2.547105766 |
| SCMH1           | 0.295375692  | 3.320300826 | 2.717505957  | 0.007932162 | -2.549656885 |
| RP11-284F21.7   | 0.3199835    | 0.383537181 | 2.717486528  | 0.007932591 | -2.549701374 |
| RP11-6C14.1     | 0.394805559  | 0.204510307 | 2.716844205  | 0.007946776 | -2.551172046 |
| RP4-744I24.4    | 0.354413634  | 0.40946126  | 2.71670628   | 0.007949825 | -2.551487804 |
| CYCSP43         | 0.234646652  | 0.086361386 | 2.716444685  | 0.007955611 | -2.55208665  |
| CD48            | -0.459278072 | 1.153551333 | -2.715751557 | 0.00797096  | -2.553673129 |
| RP11-344N10.4   | 0.272875796  | 0.347472715 | 2.714393624  | 0.008001108 | -2.556780289 |
| SNORD116        | 0.269075187  | 0.084678841 | 2.713771588  | 0.008014953 | -2.558203171 |
| HIST3H3         | 0.378042998  | 0.192059267 | 2.713325067  | 0.008024905 | -2.559224404 |
| RP11-781M16.2   | 0.222125621  | 0.106625186 | 2.713291816  | 0.008025647 | -2.559300447 |
| GAPDHP25        | 0.220988439  | 0.277588186 | 2.713207673  | 0.008027523 | -2.559492872 |

|               |              |             |              |             |              |
|---------------|--------------|-------------|--------------|-------------|--------------|
| TBX4          | 0.544908126  | 1.216154117 | 2.712616596  | 0.008040718 | -2.560844453 |
| NDUFA6        | -0.413317727 | 5.462192863 | -2.712325028 | 0.008047234 | -2.561511075 |
| KANK1         | 0.404334786  | 1.606923563 | 2.711987603  | 0.008054781 | -2.562282468 |
| MIR4505       | 0.357585178  | 0.239348319 | 2.711582552  | 0.008063849 | -2.563208358 |
| SLC35C1       | -0.313934513 | 3.110103696 | -2.711178616 | 0.008072902 | -2.564131582 |
| SMAD9-IT1     | 0.314371811  | 0.423290017 | 2.710740819  | 0.008082723 | -2.565132069 |
| MIR1278       | 0.295750069  | 0.183944637 | 2.71024626   | 0.008093831 | -2.566262113 |
| CRYGA         | 0.247251685  | 0.106578806 | 2.710178524  | 0.008095354 | -2.566416874 |
| SUMF1         | -0.31824137  | 2.162996327 | -2.710061649 | 0.008097981 | -2.566683897 |
| RP11-525J21.1 | 0.214508998  | 0.085666737 | 2.710045173  | 0.008098352 | -2.566721539 |
| GAPDHP51      | 0.209946891  | 0.14960515  | 2.710027011  | 0.00809876  | -2.566763031 |
| PTPDC1        | 0.289851669  | 1.842563607 | 2.709548896  | 0.008109518 | -2.567855266 |
| PEF1          | -0.319012303 | 4.914595514 | -2.709451498 | 0.008111711 | -2.568077749 |
| RP11-647P12.1 | 0.216544717  | 0.217774321 | 2.708534423  | 0.008132387 | -2.570172257 |
| COX6B1P2      | 0.496066306  | 0.219013353 | 2.708475426  | 0.008133719 | -2.57030698  |
| RP11-312B8.2  | 0.395583282  | 0.387850385 | 2.708090616  | 0.008142411 | -2.571185659 |
| ITPK1         | -0.324621048 | 2.673960308 | -2.707763235 | 0.008149812 | -2.571933121 |
| AC023672.1    | 0.271145268  | 0.238815363 | 2.707321835  | 0.0081598   | -2.572940788 |
| RP11-480O10.2 | 0.235704629  | 0.084406899 | 2.707185755  | 0.008162881 | -2.573251415 |
| RP11-153F5.2  | 0.249363536  | 0.079084018 | 2.706924852  | 0.008168793 | -2.573846939 |
| RP11-293P20.2 | 0.280783628  | 0.149069338 | 2.706349721  | 0.008181837 | -2.575159534 |
| RP11-667K14.3 | -0.356928269 | 1.330152781 | -2.706116187 | 0.008187139 | -2.575692451 |
| GLUDP5        | 0.304809456  | 0.22684087  | 2.706057287  | 0.008188477 | -2.575826852 |
| AC007193.6    | 0.337994558  | 0.280205251 | 2.705535378  | 0.008200339 | -2.577017675 |
| FUNDC2        | -0.28297966  | 2.478239561 | -2.705471349 | 0.008201795 | -2.577163755 |
| CCRL2         | -0.276292301 | 0.878114341 | -2.704670573 | 0.008220029 | -2.578990451 |
| RP11-526K21.2 | 0.246755874  | 0.124966487 | 2.70385919   | 0.008238542 | -2.580840885 |
| SHOX2         | 0.585393522  | 3.385254999 | 2.703334239  | 0.00825054  | -2.582037838 |
| RP11-713C19.2 | 0.237839956  | 0.554158265 | 2.703132854  | 0.008255147 | -2.58249697  |
| PLCB4         | 0.524903641  | 1.877673163 | 2.703049315  | 0.008257059 | -2.58268742  |
| RP11-706C16.7 | 0.358735722  | 0.141075234 | 2.702955763  | 0.0082592   | -2.582900691 |
| ATF6B         | 0.331982618  | 4.721197002 | 2.702851449  | 0.008261588 | -2.58313849  |
| RNU6-1162P    | 0.356374272  | 0.215038952 | 2.702443616  | 0.008270932 | -2.584068128 |

|               |              |             |              |             |              |
|---------------|--------------|-------------|--------------|-------------|--------------|
| MYO1F         | -0.415112066 | 1.686929762 | -2.701745946 | 0.008286938 | -2.585658169 |
| RP11-552E4.2  | 0.29776943   | 0.117224762 | 2.701607406  | 0.00829012  | -2.58597387  |
| RNU6-989P     | 0.269977445  | 0.085651737 | 2.701564047  | 0.008291116 | -2.586072674 |
| RP11-399D15.1 | 0.203529407  | 0.099421981 | 2.700533911  | 0.008314811 | -2.588419673 |
| RN7SKP46      | 0.257421495  | 0.109152077 | 2.700456765  | 0.008316588 | -2.588595408 |
| LINC01017     | 0.200713337  | 0.082231706 | 2.700055194  | 0.008325844 | -2.589510099 |
| HNRNPUL1      | 0.3513381    | 5.544716383 | 2.699303456  | 0.008343196 | -2.591222092 |
| LINC01221     | 0.732577715  | 0.873402789 | 2.699236777  | 0.008344736 | -2.591373927 |
| CBR3-AS1      | 0.219456834  | 0.473383811 | 2.698629502  | 0.00835878  | -2.592756605 |
| RN7SL399P     | 0.283129156  | 0.137295125 | 2.698341514  | 0.008365447 | -2.593412223 |
| RP11-17A4.3   | 0.21461046   | 0.084928342 | 2.698240288  | 0.008367792 | -2.593642653 |
| RP11-671J11.1 | 0.307445367  | 0.248756725 | 2.698199661  | 0.008368733 | -2.593735134 |
| MGA           | 0.238012997  | 1.831277181 | 2.698079843  | 0.00837151  | -2.594007876 |
| SNHG22        | 0.227103947  | 0.286803822 | 2.697038057  | 0.008395685 | -2.59637887  |
| RP11-705C15.2 | -0.298506721 | 1.269394706 | -2.696936091 | 0.008398055 | -2.596610894 |
| RNU7-193P     | 0.380972357  | 0.34218226  | 2.696815714  | 0.008400853 | -2.5968848   |
| MIR519A1      | 0.275701962  | 0.104996333 | 2.695218446  | 0.008438063 | -2.600518285 |
| RP11-432M8.18 | 0.390161266  | 0.147393402 | 2.695212854  | 0.008438194 | -2.600531002 |
| IMMP1L        | -0.227048307 | 1.794362854 | -2.694799837 | 0.00844784  | -2.601470245 |
| STX4          | -0.347465331 | 3.212029533 | -2.694451356 | 0.008455986 | -2.602262634 |
| RHBDD2        | -0.338373459 | 4.789738727 | -2.694291645 | 0.008459722 | -2.602625761 |
| UXS1          | -0.303238384 | 2.938778156 | -2.694035165 | 0.008465725 | -2.603208872 |
| RNU6-993P     | 0.322395428  | 0.132499314 | 2.693929535  | 0.008468199 | -2.60344901  |
| TCERG1        | 0.259059455  | 2.648134287 | 2.693766257  | 0.008472023 | -2.603820188 |
| TBCAP3        | 0.22934489   | 0.186334618 | 2.69344947   | 0.008479448 | -2.604540283 |
| RP11-629G13.1 | 0.419638656  | 0.706904999 | 2.693233164  | 0.008484521 | -2.605031931 |
| INVS          | 0.245634497  | 1.840411249 | 2.692861729  | 0.008493239 | -2.605876102 |
| RP11-332H18.3 | 0.20132853   | 0.319076003 | 2.692505222  | 0.008501614 | -2.606686254 |
| CPO           | 0.224686891  | 0.107960789 | 2.692390449  | 0.008504312 | -2.606947053 |
| RP11-809N8.4  | 0.267359033  | 0.452455545 | 2.692248795  | 0.008507643 | -2.607268922 |
| MID1IP1-AS1   | 0.459003672  | 1.234652927 | 2.692139426  | 0.008510215 | -2.607517424 |
| CDC42P1       | 0.252250541  | 0.437532147 | 2.691595409  | 0.008523022 | -2.608753375 |
| RN7SL492P     | 0.291871138  | 0.107318023 | 2.691548256  | 0.008524132 | -2.608860491 |

|               |              |             |              |             |              |
|---------------|--------------|-------------|--------------|-------------|--------------|
| RNU6-21P      | 0.358978862  | 0.120306931 | 2.691503268  | 0.008525192 | -2.608962689 |
| DAW1          | 0.204007382  | 0.076835954 | 2.690965757  | 0.008537866 | -2.610183622 |
| RP11-137L10.5 | 0.307565236  | 0.236871649 | 2.690649859  | 0.008545322 | -2.610901074 |
| NSMCE1        | -0.368731035 | 3.219463073 | -2.690411521 | 0.008550952 | -2.61144233  |
| C5orf34       | 0.292566762  | 1.585404417 | 2.690324278  | 0.008553013 | -2.611640447 |
| C1orf143      | 0.218039805  | 0.13169464  | 2.690237759  | 0.008555058 | -2.611836912 |
| FBXL4         | 0.264525225  | 1.710542848 | 2.689711508  | 0.008567505 | -2.613031801 |
| NAGA          | -0.31238587  | 3.900839054 | -2.689643926 | 0.008569105 | -2.613185237 |
| PLA2G15       | -0.349552357 | 2.98237179  | -2.689568868 | 0.008570882 | -2.613355643 |
| RP11-749H20.1 | 0.279104209  | 0.128602076 | 2.688374102  | 0.008599213 | -2.6160676   |
| RP11-122M14.3 | 0.26659535   | 0.126013677 | 2.688327173  | 0.008600327 | -2.616174104 |
| RNU6-1261P    | 0.3098508    | 0.114056497 | 2.688109058  | 0.008605509 | -2.616669078 |
| BCL6          | 0.398824237  | 2.699514796 | 2.686875994  | 0.008634857 | -2.619466688 |
| MDC1          | 0.407936845  | 3.15088235  | 2.686426824  | 0.00864557  | -2.62048551  |
| MIR1276       | 0.270315954  | 0.338505847 | 2.686408435  | 0.008646009 | -2.620527218 |
| RP11-126D17.1 | 0.399447019  | 0.208561196 | 2.686377422  | 0.008646749 | -2.620597557 |
| SYVN1         | 0.265195612  | 3.7813074   | 2.68596513   | 0.008656594 | -2.621532593 |
| IRAK3         | 0.479637419  | 1.278867144 | 2.685833634  | 0.008659736 | -2.621830787 |
| RP11-89M22.3  | 0.229973899  | 0.10357083  | 2.685786701  | 0.008660858 | -2.621937215 |
| DNAJC5G       | 0.264793725  | 0.130146741 | 2.685091755  | 0.008677484 | -2.623512924 |
| SELK          | -0.346562753 | 3.56608015  | -2.685016914 | 0.008679276 | -2.623682597 |
| RP11-159F24.5 | 0.315746971  | 0.480886854 | 2.684675374  | 0.008687459 | -2.624456857 |
| RNU6-710P     | 0.22754685   | 0.074017375 | 2.683858251  | 0.008707065 | -2.626308913 |
| RP11-7M10.2   | 0.20435768   | 0.202721479 | 2.68360252   | 0.008713209 | -2.626888446 |
| AC013251.1    | 0.362853486  | 0.326616184 | 2.682791419  | 0.008732723 | -2.628726243 |
| RP11-760D2.9  | 0.358343294  | 0.162151609 | 2.682724259  | 0.008734341 | -2.628878395 |
| RP11-356K23.2 | 0.298824693  | 0.204375614 | 2.682418456  | 0.008741709 | -2.629571151 |
| RP11-47P18.1  | 0.246495668  | 0.181742738 | 2.682356208  | 0.00874321  | -2.629712156 |
| RP11-301A5.2  | 0.383037765  | 0.195627366 | 2.68233873   | 0.008743631 | -2.629751747 |
| RP11-54F2.9   | 0.215920453  | 0.086291145 | 2.682257248  | 0.008745596 | -2.62993632  |
| ZNF490        | 0.203435893  | 0.575058597 | 2.682204719  | 0.008746863 | -2.630055304 |
| RNF185        | -0.296074621 | 3.401392961 | -2.682023411 | 0.008751237 | -2.630465975 |
| SUMO2P19      | 0.294576472  | 0.29708442  | 2.681501167  | 0.008763847 | -2.631648751 |

|               |              |             |              |             |              |
|---------------|--------------|-------------|--------------|-------------|--------------|
| SND1          | 0.30435847   | 5.745176577 | 2.680943859  | 0.008777321 | -2.632910728 |
| DONSON        | 0.444707548  | 3.163374045 | 2.680865008  | 0.008779229 | -2.633089262 |
| RP1-102G20.5  | 0.262663455  | 0.258937099 | 2.680732959  | 0.008782425 | -2.633388237 |
| RP11-1084E5.1 | 0.263924585  | 0.132152407 | 2.679709486  | 0.008807233 | -2.635705087 |
| RP11-345K9.2  | 0.201451556  | 0.153741787 | 2.679476902  | 0.008812879 | -2.636231487 |
| RP11-449H3.1  | 0.339450409  | 0.471046126 | 2.678831798  | 0.008828557 | -2.637691334 |
| ERN1          | 0.354742312  | 1.624451352 | 2.678387084  | 0.00883938  | -2.638697532 |
| CGREF1        | 0.945010207  | 3.139804802 | 2.678182106  | 0.008844373 | -2.639161264 |
| RP11-395G23.3 | -0.550024397 | 2.92261428  | -2.677935199 | 0.00885039  | -2.639719815 |
| CSF3R         | -0.303350562 | 0.744350911 | -2.677915703 | 0.008850865 | -2.639763917 |
| ERCC6L2       | 0.234051614  | 1.348320154 | 2.677603556  | 0.008858478 | -2.640469988 |
| BCKDHB        | 0.323127385  | 2.280814569 | 2.677464976  | 0.008861859 | -2.64078343  |
| SLC43A2       | -0.407309469 | 1.618497577 | -2.676563911 | 0.008883876 | -2.642821149 |
| RNU6-192P     | 0.302647528  | 0.121506123 | 2.675557598  | 0.008908523 | -2.645096206 |
| AL136234.1    | 0.382699726  | 0.172610774 | 2.675407787  | 0.008912198 | -2.645434833 |
| OAZ1          | -0.295440923 | 6.456046883 | -2.675333246 | 0.008914026 | -2.645603318 |
| RNA5SP204     | 0.254941468  | 0.114217897 | 2.675120396  | 0.00891925  | -2.646084402 |
| RP11-15111.2  | 0.209883408  | 0.21899579  | 2.674710129  | 0.008929328 | -2.647011594 |
| PEBP1P3       | 0.278355782  | 0.187517102 | 2.674588901  | 0.008932307 | -2.647285546 |
| RNU6-1064P    | 0.282995739  | 0.223669819 | 2.674430825  | 0.008936194 | -2.647642747 |
| C2CD3         | 0.230313829  | 1.614956955 | 2.6744275    | 0.008936276 | -2.647650261 |
| AC002539.2    | 0.270984619  | 0.097289025 | 2.674273388  | 0.008940067 | -2.647998488 |
| RP11-386P4.1  | 0.206191819  | 0.0873085   | 2.674243393  | 0.008940804 | -2.648066263 |
| SNORD74       | 0.293032486  | 0.255563415 | 2.67420865   | 0.008941659 | -2.648144764 |
| RP11-466F5.4  | 0.216538868  | 0.215780362 | 2.674195817  | 0.008941975 | -2.648173761 |
| RN7SL636P     | 0.209231072  | 0.126369509 | 2.674114207  | 0.008943983 | -2.648358153 |
| RPL7P11       | 0.233823162  | 0.466178013 | 2.674049137  | 0.008945585 | -2.648505172 |
| DGUOK         | -0.298208068 | 4.843710515 | -2.673198422 | 0.008966548 | -2.650426995 |
| CTC-490E21.13 | 0.23813526   | 0.092609189 | 2.67305481   | 0.008970092 | -2.650751372 |
| RNU6-837P     | 0.324106932  | 0.105406739 | 2.672855573  | 0.00897501  | -2.651201369 |
| MIR566        | 0.240970237  | 0.183454495 | 2.67262175   | 0.008980784 | -2.651729444 |
| RP11-731C17.1 | 0.241432839  | 0.134978757 | 2.671404728  | 0.009010895 | -2.654477397 |
| CTD-2125J1.1  | 0.213604622  | 0.081063187 | 2.671025681  | 0.009020292 | -2.655333046 |



|                |              |             |              |             |              |
|----------------|--------------|-------------|--------------|-------------|--------------|
| ZFC3H1         | 0.280537235  | 1.882792137 | 2.670885835  | 0.009023761 | -2.655648705 |
| PTPN14         | 0.385059841  | 3.211744056 | 2.670484785  | 0.009033716 | -2.656553872 |
| SETP7          | 0.204845784  | 0.123254454 | 2.67034751   | 0.009037126 | -2.656863674 |
| RP11-203M5.2   | 0.242083458  | 0.172295737 | 2.670100921  | 0.009043255 | -2.657420145 |
| RP11-424D14.1  | 0.251031471  | 0.118644715 | 2.669883064  | 0.009048672 | -2.65791174  |
| RNU7-30P       | 0.301366008  | 0.149893378 | 2.669499775  | 0.00905821  | -2.658776553 |
| RP11-416N2.4   | 0.332957938  | 0.538504337 | 2.669145037  | 0.009067046 | -2.659576853 |
| RP11-736N17.10 | 0.412201735  | 0.358524585 | 2.667953458  | 0.009096784 | -2.662264448 |
| RP11-166N6.2   | 0.203803568  | 0.069381508 | 2.667880447  | 0.009098609 | -2.66242909  |
| AC106870.2     | 0.302228724  | 0.135555114 | 2.667790908  | 0.009100847 | -2.662631    |
| GMEB2          | 0.244510189  | 2.5256073   | 2.667765986  | 0.00910147  | -2.662687198 |
| RP11-325K19.1  | 0.20446546   | 0.083476681 | 2.667737743  | 0.009102177 | -2.662750882 |
| HNRNPCP9       | 0.233534152  | 0.116026962 | 2.667648481  | 0.009104409 | -2.662952159 |
| RP11-142L1.3   | 0.212649339  | 0.171147182 | 2.667502918  | 0.00910805  | -2.663280375 |
| LMLN           | 0.230348125  | 1.227063652 | 2.667395873  | 0.009110729 | -2.663521729 |
| DLX1           | 0.492003091  | 1.711777002 | 2.667283345  | 0.009113546 | -2.663775439 |
| SERBP1P3       | 0.224178989  | 0.471989232 | 2.666795714  | 0.009125761 | -2.664874766 |
| MIR4767        | 0.535914034  | 0.931233237 | 2.66660875   | 0.009130449 | -2.665296218 |
| SNORA64        | 0.321732693  | 0.211796262 | 2.66634447   | 0.009137079 | -2.665891913 |
| RNU6-233P      | 0.315921403  | 0.239743258 | 2.666127035  | 0.009142536 | -2.66638198  |
| RNU6-143P      | 0.355469696  | 0.216905081 | 2.66558272   | 0.009156212 | -2.66760864  |
| PDZD11         | -0.346647197 | 4.655442946 | -2.665478768 | 0.009158826 | -2.667842882 |
| RP11-438P9.1   | 0.360209253  | 0.390899004 | 2.665314294  | 0.009162963 | -2.668213486 |
| RN7SL580P      | 0.352578999  | 0.154616335 | 2.664764137  | 0.009176814 | -2.669452995 |
| GSS            | -0.331041765 | 4.454610215 | -2.664661662 | 0.009179396 | -2.669683851 |
| PITPNM1        | 0.406620872  | 2.406251904 | 2.664618367  | 0.009180487 | -2.669781382 |
| SF1            | 0.227994925  | 5.280685067 | 2.66377934   | 0.009201654 | -2.671671221 |
| RNU6-262P      | 0.290141837  | 0.216301277 | 2.663752174  | 0.00920234  | -2.671732402 |
| MUC1           | 0.568953922  | 1.345008396 | 2.663193701  | 0.009216455 | -2.672990031 |
| PABPC1P10      | 0.294786737  | 0.727022134 | 2.662918425  | 0.00922342  | -2.673609845 |
| PLEKHA3        | 0.233828857  | 1.490266133 | 2.662875112  | 0.009224516 | -2.673707364 |
| MEMO1          | 0.227743766  | 1.292451294 | 2.662675624  | 0.009229567 | -2.674156495 |
| MIR548P        | -0.31871971  | 0.325446713 | -2.66223837  | 0.009240646 | -2.675140836 |

|               |              |             |              |             |              |
|---------------|--------------|-------------|--------------|-------------|--------------|
| MTMR12        | 0.381662221  | 2.475573178 | 2.661987083  | 0.009247019 | -2.675706469 |
| MYL6B         | -0.43367618  | 3.520882611 | -2.661974006 | 0.00924735  | -2.675735905 |
| SETP3         | 0.228088164  | 0.484240645 | 2.661324237  | 0.009263847 | -2.677198287 |
| ZC3H6         | 0.268041752  | 1.027268117 | 2.6609645    | 0.009272992 | -2.678007788 |
| RP11-148K1.10 | 0.307198785  | 0.441305747 | 2.660858238  | 0.009275695 | -2.678246889 |
| RN7SKP229     | 0.212327595  | 0.121883375 | 2.660742679  | 0.009278635 | -2.678506899 |
| ZFR           | 0.293632004  | 3.761181109 | 2.660708518  | 0.009279505 | -2.678583759 |
| RNA5SP367     | 0.331835508  | 0.211419462 | 2.660704697  | 0.009279602 | -2.678592356 |
| RP4-764O22.1  | 0.372902228  | 0.242289185 | 2.660558835  | 0.009283315 | -2.678920532 |
| RP11-5O23.1   | 0.223536522  | 0.12851773  | 2.660408313  | 0.009287148 | -2.679259175 |
| RNU6-252P     | 0.209635646  | 0.105336715 | 2.660358031  | 0.009288428 | -2.679372296 |
| BLOC1S4       | -0.346565899 | 3.062685372 | -2.660286843 | 0.009290242 | -2.679532445 |
| RP11-11L12.2  | 0.23170648   | 0.185789224 | 2.660129482  | 0.009294251 | -2.679886445 |
| RP11-57G10.1  | 0.268961557  | 0.145681886 | 2.659913757  | 0.009299751 | -2.680371711 |
| RP3-343K2.4   | 0.28264211   | 0.180288421 | 2.659847239  | 0.009301447 | -2.680521336 |
| RP11-643G5.2  | 0.221090103  | 0.078353908 | 2.659617728  | 0.009307302 | -2.681037565 |
| AC027612.2    | 0.214967443  | 0.079695781 | 2.659584813  | 0.009308142 | -2.681111597 |
| RP4-800G7.3   | 0.255259253  | 0.497324137 | 2.65950693   | 0.00931013  | -2.681286766 |
| RP11-5N11.4   | 0.393541747  | 0.196428161 | 2.65870722   | 0.009330562 | -2.683085171 |
| METTL21AP1    | 0.2137214    | 0.147165034 | 2.658557418  | 0.009334394 | -2.683421998 |
| LTB           | -0.525842849 | 1.077320044 | -2.658458678 | 0.009336921 | -2.683644005 |
| CCDC58P5      | 0.269309615  | 0.225516143 | 2.657897987  | 0.00935128  | -2.684904532 |
| RPL36P18      | 0.20022212   | 0.108082402 | 2.657562844  | 0.009359873 | -2.685657882 |
| RP11-390D11.1 | 0.276019478  | 0.224115555 | 2.657445899  | 0.009362872 | -2.685920738 |
| SPATA18       | 0.384342497  | 0.781121418 | 2.657329568  | 0.009365858 | -2.686182206 |
| GPX4          | -0.386774956 | 6.492706097 | -2.657252772 | 0.009367829 | -2.686354808 |
| RNU4-16P      | 0.363215857  | 0.132204102 | 2.657030753  | 0.009373529 | -2.686853781 |
| AC104532.3    | 0.215171638  | 0.239039616 | 2.656886896  | 0.009377224 | -2.68717707  |
| SIRPB2        | -0.223430736 | 0.546493393 | -2.656813683 | 0.009379106 | -2.687341596 |
| CTD-2555K7.3  | 0.249406813  | 0.137574004 | 2.65611682   | 0.009397028 | -2.688907415 |
| AC022816.2    | 0.204886765  | 0.190527666 | 2.655798614  | 0.009405222 | -2.689622295 |
| RPP25         | 0.512373255  | 3.002547527 | 2.655758843  | 0.009406247 | -2.689711639 |
| UQCR11        | -0.359688299 | 4.669062811 | -2.655599256 | 0.009410359 | -2.690070137 |

|               |              |             |              |             |              |
|---------------|--------------|-------------|--------------|-------------|--------------|
| ORMDL3        | -0.298123468 | 3.836630779 | -2.655544699 | 0.009411766 | -2.690192688 |
| HTR3E-AS1     | 0.235218632  | 0.097363037 | 2.655319333  | 0.009417577 | -2.690698912 |
| HIST1H1D      | 0.402121829  | 0.581279942 | 2.655118277  | 0.009422764 | -2.691150497 |
| RP11-737G21.1 | 0.236987063  | 0.082934291 | 2.654671689  | 0.009434294 | -2.692153465 |
| ATP11A-AS1    | 0.20096841   | 0.148084922 | 2.65437262   | 0.009442023 | -2.692825048 |
| AC005487.2    | 0.237999969  | 0.092302243 | 2.654090259  | 0.009449326 | -2.693459053 |
| RPL21P7       | 0.313286969  | 0.590655479 | 2.65397      | 0.009452437 | -2.693729063 |
| RNU6-456P     | 0.401309415  | 0.135581254 | 2.653801558  | 0.009456797 | -2.694107237 |
| MTMR14        | -0.250513509 | 2.276992965 | -2.653378926 | 0.009467745 | -2.695056014 |
| KLHL28        | 0.381592719  | 1.589509449 | 2.65287975   | 0.00948069  | -2.696176461 |
| AC012363.13   | 0.260734325  | 0.131102812 | 2.652721262  | 0.009484803 | -2.696532164 |
| PEX5          | -0.335003673 | 2.814236233 | -2.652402884 | 0.009493071 | -2.697246668 |
| RP11-123C5.5  | 0.244727614  | 0.157449281 | 2.652240389  | 0.009497294 | -2.69761131  |
| LGALS1        | -0.596823256 | 9.45184972  | -2.651872466 | 0.009506861 | -2.698436868 |
| RP11-545P6.2  | 0.216549494  | 0.078732735 | 2.651593359  | 0.009514124 | -2.699063074 |
| TUBBP11       | 0.314000977  | 0.128353017 | 2.651368745  | 0.009519973 | -2.69956698  |
| AC110611.1    | 0.385209362  | 0.364686637 | 2.651312541  | 0.009521437 | -2.699693064 |
| C9orf47       | 0.205488322  | 0.456686294 | 2.651169852  | 0.009525154 | -2.700013151 |
| RP11-10D7.5   | 0.231311522  | 0.248887203 | 2.650897138  | 0.009532263 | -2.700624879 |
| SHCBP1L       | 0.207684629  | 0.150821017 | 2.650244516  | 0.009549296 | -2.70208857  |
| RN7SL596P     | 0.339309199  | 0.301633657 | 2.649629858  | 0.009565362 | -2.70346684  |
| TRAPPC10      | 0.270764188  | 1.502218124 | 2.64942703   | 0.009570669 | -2.70392159  |
| RP11-230C9.1  | 0.254535219  | 0.123901212 | 2.648829865  | 0.00958631  | -2.705260291 |
| RP1-81D8.4    | 0.291672579  | 0.104112849 | 2.648575506  | 0.009592979 | -2.705830426 |
| B4GALNT2P1    | 0.299568633  | 0.101924185 | 2.647973225  | 0.009608787 | -2.707180233 |
| CTC-251I16.1  | -0.598212848 | 1.68935754  | -2.647542691 | 0.009620102 | -2.708144971 |
| HSCB          | -0.336274705 | 2.943000978 | -2.647164275 | 0.009630057 | -2.708992814 |
| RP11-120I21.3 | 0.318123305  | 0.181519919 | 2.647150733  | 0.009630414 | -2.709023154 |
| TNFRSF1A      | -0.376130431 | 5.101023828 | -2.646948925 | 0.009635727 | -2.70947526  |
| DNAJC21       | 0.267094369  | 2.527393013 | 2.646617811  | 0.00964445  | -2.71021699  |
| RP11-297L6.2  | 0.220053359  | 0.123823369 | 2.64660931   | 0.009644674 | -2.710236032 |
| TMEM242       | -0.263495263 | 2.06732801  | -2.646386699 | 0.009650542 | -2.710734659 |
| AC012627.1    | 0.421524299  | 0.493156985 | 2.646298745  | 0.009652862 | -2.710931658 |

|               |              |             |              |             |              |
|---------------|--------------|-------------|--------------|-------------|--------------|
| RP11-299H22.7 | 0.24919972   | 0.082557522 | 2.645823893  | 0.009665394 | -2.711995132 |
| POC1B         | 0.276032672  | 1.516758526 | 2.645811376  | 0.009665725 | -2.712023162 |
| CDRT7         | 0.330325527  | 0.111719136 | 2.645805184  | 0.009665888 | -2.712037029 |
| NAV1          | 0.37159338   | 2.898218069 | 2.645656912  | 0.009669805 | -2.712369062 |
| RNA5SP19      | 0.353156011  | 0.2093052   | 2.64553946   | 0.009672908 | -2.712632066 |
| IRF1          | -0.425425366 | 2.340720675 | -2.645346393 | 0.009678011 | -2.713064374 |
| IMMP1LP3      | 0.430321239  | 0.354931826 | 2.645225777  | 0.0096812   | -2.713334438 |
| CHCHD2P4      | 0.222594377  | 0.103380231 | 2.645121343  | 0.009683963 | -2.713568262 |
| C2orf88       | 0.296822378  | 0.631955297 | 2.645040188  | 0.00968611  | -2.713749959 |
| RP11-388G22.1 | 0.378290598  | 0.151016091 | 2.644911778  | 0.009689508 | -2.714037447 |
| XCL2          | -0.374481189 | 0.530152485 | -2.644189879 | 0.009708631 | -2.71565343  |
| ADH5          | -0.279493016 | 4.279125223 | -2.643885657 | 0.0097167   | -2.716334327 |
| AL359851.1    | 0.235064682  | 0.138459442 | 2.643830896  | 0.009718154 | -2.716456884 |
| NKG7          | -0.709139185 | 1.567788681 | -2.643767447 | 0.009719837 | -2.716598881 |
| CSF1          | -0.772187305 | 4.45116872  | -2.643564166 | 0.009725234 | -2.717053803 |
| GSC           | 0.608243326  | 2.250214067 | 2.643406527  | 0.009729421 | -2.717406562 |
| RP11-157P23.2 | 0.29903783   | 0.106146775 | 2.642792144  | 0.009745755 | -2.718781237 |
| CTD-2213F21.4 | 0.217971223  | 0.07501067  | 2.642714177  | 0.00974783  | -2.718955669 |
| C21orf62      | 0.229761125  | 0.14415894  | 2.640670621  | 0.009802349 | -2.723526067 |
| MED13L        | 0.354403844  | 2.569198408 | 2.64000339   | 0.00982021  | -2.725017683 |
| ARHGAP11A     | 0.390134964  | 2.672795725 | 2.639527805  | 0.009832958 | -2.726080676 |
| MIR181A2HG    | 0.358605618  | 1.19135678  | 2.639395477  | 0.009836508 | -2.726376417 |
| RP11-535M15.1 | 0.559724706  | 2.669938765 | 2.639361672  | 0.009837415 | -2.726451967 |
| RP11-383G6.3  | 0.243947028  | 0.315218542 | 2.63928371   | 0.009839507 | -2.726626196 |
| OSBP          | 0.298408664  | 3.778649241 | 2.639137078  | 0.009843443 | -2.72695388  |
| EIF2A         | 0.287865608  | 4.126574981 | 2.639042582  | 0.00984598  | -2.727165045 |
| RP11-288K12.1 | 0.275980138  | 0.209197698 | 2.638602071  | 0.009857816 | -2.728149347 |
| RNU6-1018P    | 0.339255542  | 0.145170691 | 2.638463931  | 0.009861531 | -2.728457987 |
| MIR1285-2     | 0.289610048  | 0.133800516 | 2.638415924  | 0.009862822 | -2.728565243 |
| RP11-399E6.2  | 0.220350802  | 0.136395067 | 2.638216987  | 0.009868174 | -2.729009688 |
| AC010243.1    | 0.291056445  | 0.202208913 | 2.637481657  | 0.009887978 | -2.730652244 |
| NEDD8         | -0.425661454 | 4.232195555 | -2.63713146  | 0.009897423 | -2.731434367 |
| AL606500.1    | 0.35476225   | 0.471719274 | 2.636828316  | 0.009905605 | -2.732111334 |

|               |       |              |             |              |             |              |
|---------------|-------|--------------|-------------|--------------|-------------|--------------|
| AC131011.1    |       | 0.211546278  | 0.194947321 | 2.636645592  | 0.00991054  | -2.73251935  |
| RNU6-672P     |       | 0.382592284  | 0.433561203 | 2.635897216  | 0.009930775 | -2.73419021  |
| SDHAF2        |       | -0.267251782 | 2.798035313 | -2.634609188 | 0.009965689 | -2.737064989 |
| ACACB         |       | 0.225271443  | 1.057685037 | 2.633794415  | 0.009987832 | -2.738882893 |
| DYRK4         |       | -0.32815089  | 1.843144971 | -2.632844001 | 0.010013718 | -2.741002837 |
| RP11-210K20.6 |       | 0.321137816  | 0.155476629 | 2.632156778  | 0.010032473 | -2.742535324 |
| RN7SL810P     |       | 0.257699851  | 0.128394512 | 2.631766819  | 0.01004313  | -2.74340477  |
| HMGB1P28      |       | 0.265300974  | 0.138150356 | 2.631552598  | 0.010048988 | -2.743882349 |
| NFX1          |       | 0.28164447   | 2.799332517 | 2.630742838  | 0.010071162 | -2.745687309 |
| AC073046.1    |       | 0.229529566  | 0.110411693 | 2.630739344  | 0.010071257 | -2.745695097 |
| SNX25         |       | 0.299657019  | 2.315488484 | 2.630512679  | 0.010077472 | -2.74620025  |
| RN7SL648P     |       | 0.338662604  | 0.555704892 | 2.630498669  | 0.010077856 | -2.746231471 |
|               | 1-Mar | -0.283487564 | 0.80444233  | -2.630469567 | 0.010078654 | -2.746296328 |
| RP11-871F6.3  |       | 0.201925174  | 0.108321515 | 2.629793992  | 0.0100972   | -2.747801699 |
| ZNF131        |       | 0.315854847  | 2.519708286 | 2.629195607  | 0.010113652 | -2.749134801 |
| NNAT          |       | 0.486920261  | 0.792381738 | 2.628146629  | 0.010142552 | -2.751471133 |
| TRAJ36        |       | 0.366379389  | 0.244873701 | 2.62812798   | 0.010143066 | -2.751512662 |
| FXVD5         |       | -0.552032162 | 5.156753339 | -2.627878613 | 0.010149947 | -2.752067945 |
| RP11-236P24.1 |       | 0.200763616  | 0.199313113 | 2.626946645  | 0.010175703 | -2.754142834 |
| PHIP          |       | 0.318570842  | 2.458342538 | 2.626568913  | 0.010186159 | -2.754983623 |
| PRKCA         |       | 0.494356322  | 2.510217841 | 2.626500649  | 0.010188049 | -2.75513556  |
| RN7SL535P     |       | 0.394119291  | 0.570180854 | 2.626477441  | 0.010188692 | -2.755187212 |
| RP11-239E10.3 |       | 0.229810165  | 0.095627062 | 2.626143486  | 0.010197946 | -2.755930453 |
| AC012370.3    |       | 0.223646335  | 0.134248401 | 2.625560896  | 0.010214109 | -2.757226856 |
| AC010655.1    |       | 0.455342203  | 0.168099108 | 2.625478208  | 0.010216404 | -2.757410838 |
| RN7SL304P     |       | 0.243832951  | 0.100831266 | 2.625381247  | 0.010219097 | -2.75762657  |
| EFNA5         |       | -0.515120547 | 1.982302096 | -2.62534999  | 0.010219965 | -2.757696113 |
| RN7SL526P     |       | 0.318392736  | 0.62401652  | 2.62534321   | 0.010220154 | -2.757711198 |
| RP11-3K16.1   |       | 0.230802847  | 0.351721514 | 2.62526489   | 0.010222329 | -2.757885448 |
| RSRC1         |       | 0.278167907  | 2.621615826 | 2.624472741  | 0.010244358 | -2.759647617 |
| AC138123.1    |       | 0.208376258  | 0.080485366 | 2.624260807  | 0.010250259 | -2.760118997 |
| RP11-443P15.2 |       | 0.212401418  | 0.19086502  | 2.623962418  | 0.010258573 | -2.760782615 |
| GK5           |       | 0.306563144  | 1.367184438 | 2.623911874  | 0.010259982 | -2.760895019 |

|               |              |             |              |             |              |
|---------------|--------------|-------------|--------------|-------------|--------------|
| FAM175A       | 0.321115902  | 1.164932392 | 2.623715082  | 0.010265469 | -2.761332642 |
| AC108044.1    | 0.281010921  | 0.136745135 | 2.623485923  | 0.010271861 | -2.76184221  |
| AL160011.1    | 0.537337382  | 0.481785067 | 2.623395208  | 0.010274393 | -2.762043918 |
| RNU4-34P      | 0.205035125  | 0.128145293 | 2.623380724  | 0.010274797 | -2.762076123 |
| YBX3          | -0.713522308 | 3.093569932 | -2.623140466 | 0.010281505 | -2.76261031  |
| CNKS2         | 0.473041754  | 0.787738505 | 2.622948128  | 0.010286878 | -2.763037925 |
| RNU6-145P     | 0.314534914  | 0.221182028 | 2.622893519  | 0.010288404 | -2.763159329 |
| RP11-141B14.2 | 0.212047425  | 0.164626396 | 2.622824516  | 0.010290332 | -2.763312731 |
| FAM212A       | -0.352467455 | 2.060469785 | -2.622810348 | 0.010290728 | -2.763344229 |
| AC073850.6    | 0.359235995  | 0.52127122  | 2.62274366   | 0.010292592 | -2.763492478 |
| RN7SL62P      | 0.206323268  | 0.115641712 | 2.621272906  | 0.010333782 | -2.766761238 |
| CDC14B        | 0.355145126  | 2.001522913 | 2.621259504  | 0.010334158 | -2.766791016 |
| AC105402.2    | 0.270498923  | 0.237418683 | 2.62122298   | 0.010335183 | -2.766872172 |
| SLC36A4       | 0.339919201  | 2.091136143 | 2.621207756  | 0.01033561  | -2.766905998 |
| PGLS          | -0.395267307 | 3.891937146 | -2.620873631 | 0.01034499  | -2.767648362 |
| AC004449.6    | -0.245645247 | 0.504138134 | -2.620718936 | 0.010349335 | -2.767992041 |
| AC005546.2    | 0.336466987  | 0.741343792 | 2.620673003  | 0.010350625 | -2.768094083 |
| AC118550.1    | 0.302445538  | 0.132946729 | 2.62058862   | 0.010352997 | -2.768281542 |
| MIR3170       | 0.375350275  | 0.389046374 | 2.620432122  | 0.010357396 | -2.768629193 |
| RNU6-874P     | 0.468581645  | 0.291822534 | 2.620372666  | 0.010359067 | -2.768761267 |
| RP11-814E24.1 | 0.256978461  | 0.129144683 | 2.620108733  | 0.010366491 | -2.769347527 |
| AL590085.1    | 0.574079451  | 0.423526092 | 2.620089421  | 0.010367034 | -2.769390421 |
| RP5-1116H23.6 | 0.234478257  | 0.191690825 | 2.619748742  | 0.010376625 | -2.770147075 |
| CTA-331F8.1   | 0.210643888  | 0.302159037 | 2.619562918  | 0.010381859 | -2.77055976  |
| CCNB3P1       | 0.299307177  | 0.121167084 | 2.619507811  | 0.010383412 | -2.770682139 |
| RP5-1106H14.1 | 0.220439961  | 0.092110842 | 2.619478393  | 0.010384241 | -2.770747468 |
| RP11-474I16.8 | 0.262260826  | 0.30644601  | 2.619429488  | 0.010385619 | -2.77085607  |
| AC022395.1    | 0.353670555  | 0.188137831 | 2.619114741  | 0.010394493 | -2.771554984 |
| TMEM219       | -0.350936621 | 4.548101488 | -2.618926944 | 0.010399791 | -2.771971963 |
| RP11-646E18.2 | 0.252469167  | 0.116420786 | 2.618504089  | 0.01041173  | -2.77291077  |
| UROD          | -0.35145346  | 4.234697768 | -2.618406251 | 0.010414494 | -2.773127967 |
| IL11          | 0.839416974  | 1.023756802 | 2.617832499  | 0.010430716 | -2.774401546 |
| MRPL51        | -0.443636387 | 5.499060872 | -2.61782505  | 0.010430927 | -2.774418079 |

|               |              |             |              |             |              |
|---------------|--------------|-------------|--------------|-------------|--------------|
| TMEM115       | -0.270032766 | 4.303685287 | -2.61774044  | 0.010433321 | -2.774605871 |
| UQCRBP3       | 0.212927612  | 0.097227298 | 2.617338982  | 0.010444688 | -2.775496836 |
| RP11-475D10.5 | 0.273499492  | 0.094482721 | 2.617111125  | 0.010451145 | -2.776002473 |
| AC092933.4    | 0.222581079  | 0.13361094  | 2.61665285   | 0.010464142 | -2.777019318 |
| FTLP3         | -0.559952987 | 5.140190735 | -2.616529745 | 0.010467636 | -2.777292446 |
| RP11-487E1.2  | 0.292390426  | 0.304387556 | 2.615734681  | 0.010490226 | -2.779056151 |
| PSME2P2       | -0.441700762 | 1.770031644 | -2.615113929 | 0.010507894 | -2.780432865 |
| MXD1          | 0.352678951  | 2.037438256 | 2.61499701   | 0.010511225 | -2.780692139 |
| RP3-507I15.2  | 0.245386777  | 0.150243879 | 2.614648847  | 0.010521149 | -2.78146415  |
| CCDC14        | 0.307619751  | 2.089365919 | 2.614618945  | 0.010522001 | -2.781530451 |
| RNU6-1238P    | 0.295673738  | 0.422488148 | 2.614614146  | 0.010522138 | -2.781541092 |
| CTD-2025J6.1  | 0.322411771  | 0.142226506 | 2.614140591  | 0.010535651 | -2.782590994 |
| RP11-363G15.2 | 0.258178091  | 0.119345375 | 2.613662142  | 0.01054932  | -2.783651587 |
| PRRG1         | 0.303181259  | 1.770614666 | 2.613448527  | 0.010555428 | -2.784125062 |
| SUMO2P18      | 0.310608139  | 0.229792386 | 2.61325744   | 0.010560894 | -2.784548575 |
| LINC00605     | 0.228138708  | 0.214883077 | 2.61321212   | 0.010562191 | -2.784649014 |
| RP3-416J7.1   | 0.245566553  | 0.086199435 | 2.612861083  | 0.010572241 | -2.785426952 |
| HMMR          | 0.485564189  | 2.63485983  | 2.612768067  | 0.010574906 | -2.785633071 |
| VSTM1         | 0.219993408  | 0.125470042 | 2.612435462  | 0.010584438 | -2.78637006  |
| RNU2-13P      | 0.273443621  | 0.127764602 | 2.611990289  | 0.010597209 | -2.78735635  |
| AC233299.1    | 0.23469299   | 0.079863827 | 2.611866477  | 0.010600763 | -2.787630634 |
| RNU4-68P      | 0.38969027   | 0.559099261 | 2.611839991  | 0.010601523 | -2.787689308 |
| CTD-3066C23.1 | 0.224705541  | 0.15552465  | 2.611596669  | 0.010608512 | -2.788228307 |
| FAM73A        | 0.292391038  | 2.106072537 | 2.611334209  | 0.010616055 | -2.788809655 |
| NNT           | 0.340664745  | 3.281412691 | 2.611131361  | 0.010621888 | -2.789258927 |
| RP11-224P11.1 | 0.205804858  | 0.085824839 | 2.611103044  | 0.010622703 | -2.789321644 |
| RNA5SP197     | 0.310352016  | 0.183162919 | 2.610821561  | 0.010630803 | -2.789945025 |
| RP11-648O15.2 | 0.252164885  | 0.159403777 | 2.610415561  | 0.010642495 | -2.790844065 |
| SNORD7        | -0.411442683 | 0.70818483  | -2.610090508 | 0.010651865 | -2.791563774 |
| RP11-458F8.1  | 0.38291888   | 1.128795489 | 2.609791059  | 0.010660503 | -2.792226725 |
| RP5-866L20.2  | 0.332260791  | 0.196673358 | 2.609772996  | 0.010661024 | -2.792266714 |
| RPL21P5       | 0.354303341  | 0.471764761 | 2.60965465   | 0.01066444  | -2.792528702 |
| OSMR-AS1      | 0.266474043  | 0.558905923 | 2.609587694  | 0.010666373 | -2.79267692  |

|               |              |             |              |             |              |
|---------------|--------------|-------------|--------------|-------------|--------------|
| RNU6-753P     | 0.560127488  | 0.20804544  | 2.609218955  | 0.010677024 | -2.793493132 |
| APOC1         | -0.78648809  | 3.703174268 | -2.609140651 | 0.010679287 | -2.793666446 |
| PNPLA4        | -0.421762796 | 2.174148231 | -2.60892747  | 0.010685451 | -2.79413827  |
| RP1-128O3.5   | 0.231752112  | 0.179121557 | 2.608703833  | 0.01069192  | -2.794633203 |
| HLA-A         | -0.533372201 | 7.972182422 | -2.608670649 | 0.01069288  | -2.794706638 |
| TPCN2         | 0.314601613  | 2.079887411 | 2.608549292  | 0.010696392 | -2.794975197 |
| DDHD2         | 0.366946151  | 1.976652563 | 2.607797787  | 0.010718165 | -2.796638008 |
| RP11-359K18.4 | 0.50401627   | 1.507091215 | 2.60778509   | 0.010718533 | -2.796666098 |
| CFTRP3        | 0.255634521  | 0.094520184 | 2.607730578  | 0.010720114 | -2.796786699 |
| RP11-252M24.1 | 0.218750691  | 0.071903865 | 2.607726722  | 0.010720226 | -2.796795229 |
| OOSP1P1       | 0.280987284  | 0.112497701 | 2.607653963  | 0.010722337 | -2.796956193 |
| RNA5SP517     | 0.260900409  | 0.084531521 | 2.607652019  | 0.010722393 | -2.796960493 |
| AP001469.9    | 0.280786748  | 0.780252126 | 2.606597916  | 0.010753011 | -2.799292058 |
| PHLPP1        | 0.343965624  | 1.818511508 | 2.606530161  | 0.010754982 | -2.799441898 |
| IL23R         | 0.202516737  | 0.230133949 | 2.606214538  | 0.010764167 | -2.800139853 |
| AC087499.7    | 0.201316471  | 0.124639663 | 2.605793796  | 0.010776422 | -2.801070154 |
| WDR44         | 0.421985414  | 2.464268259 | 2.605544215  | 0.010783697 | -2.80162194  |
| USF2          | -0.32972979  | 4.681122757 | -2.605191614 | 0.010793983 | -2.802401414 |
| PRAMEF17      | 0.214305956  | 0.078336074 | 2.604840754  | 0.010804227 | -2.80317695  |
| CXCL9         | -0.906974142 | 1.526733558 | -2.604446311 | 0.010815754 | -2.804048718 |
| MIR4644       | 0.21159583   | 0.135213356 | 2.604128881  | 0.010825039 | -2.804750196 |
| RNU6-344P     | 0.310992875  | 0.10148853  | 2.603913657  | 0.010831338 | -2.805225771 |
| RP11-59H7.1   | 0.408684846  | 0.226886835 | 2.603481154  | 0.010844006 | -2.806181364 |
| SLC26A3       | 0.204015245  | 0.091401484 | 2.603105008  | 0.010855035 | -2.807012328 |
| MYO5C         | 0.238797263  | 0.648183166 | 2.603089863  | 0.010855479 | -2.807045784 |
| RN7SKP224     | 0.215064082  | 0.104196322 | 2.602838245  | 0.010862863 | -2.807601589 |
| CIRBP         | -0.312355061 | 4.677642879 | -2.602818866 | 0.010863431 | -2.807644393 |
| FAM210A       | 0.323374344  | 2.620032923 | 2.601703012  | 0.010896231 | -2.810108667 |
| HLA-B         | -0.644681493 | 7.596144129 | -2.601145235 | 0.01091266  | -2.81134014  |
| SGK494        | 0.265818206  | 0.906752511 | 2.600615514  | 0.010928283 | -2.812509463 |
| RNU6-1223P    | 0.37346736   | 0.655401796 | 2.600522262  | 0.010931036 | -2.812715289 |
| CASP8AP2      | 0.302496525  | 1.729241477 | 2.600371782  | 0.010935479 | -2.813047416 |
| BCL2L11       | 0.403576392  | 2.528524325 | 2.59895041   | 0.010977525 | -2.816183761 |



|               |              |             |              |             |              |
|---------------|--------------|-------------|--------------|-------------|--------------|
| RNU6-463P     | 0.250892813  | 0.082304651 | 2.598888057  | 0.010979373 | -2.816321313 |
| RP11-575L7.8  | 0.382510795  | 1.081608568 | 2.598789371  | 0.010982298 | -2.816539011 |
| LINC00383     | 0.203975751  | 0.089911453 | 2.598240658  | 0.010998575 | -2.817749331 |
| RNU6-1092P    | 0.388498038  | 0.258412369 | 2.597979579  | 0.011006327 | -2.818325128 |
| BEND2         | 0.365542146  | 0.127046983 | 2.597841598  | 0.011010426 | -2.818629417 |
| AL022344.2    | 0.233286488  | 0.094871897 | 2.596536324  | 0.011049272 | -2.821507276 |
| CNNM1         | 0.246804578  | 0.217117609 | 2.595911677  | 0.011067905 | -2.822884062 |
| GPR142        | 0.232981559  | 0.208638185 | 2.595484932  | 0.011080651 | -2.823824491 |
| TMEM51        | -0.385067024 | 3.177621236 | -2.595001035 | 0.011095121 | -2.82489071  |
| ZNF532        | 0.368962176  | 2.864883251 | 2.594921774  | 0.011097492 | -2.825065338 |
| RP11-348H3.5  | 0.31513539   | 0.503919638 | 2.594338488  | 0.01111496  | -2.826350295 |
| BATF          | -0.586138475 | 1.605902264 | -2.594049156 | 0.011123634 | -2.82698759  |
| IGHVII-67-1   | 0.22920025   | 0.073825072 | 2.59391273   | 0.011127725 | -2.827288069 |
| AL022400.1    | 0.493337425  | 0.20965296  | 2.593567344  | 0.011138091 | -2.828048721 |
| CAPN15        | 0.341723158  | 2.817487311 | 2.593360029  | 0.011144317 | -2.828505255 |
| AC024162.2    | 0.290509772  | 0.140167448 | 2.592900024  | 0.011158143 | -2.829518134 |
| RP11-296O14.3 | 0.283436522  | 0.816419871 | 2.592713835  | 0.011163744 | -2.829928058 |
| MIR4474       | 0.265398862  | 0.107393401 | 2.592481462  | 0.011170737 | -2.830439628 |
| BOLA2P2       | 0.297206387  | 0.491560009 | 2.592340528  | 0.01117498  | -2.830749876 |
| RP4-550H1.4   | 0.23555389   | 0.149714061 | 2.591679382  | 0.011194906 | -2.832205115 |
| BNIP3P1       | 0.368727557  | 0.876696398 | 2.591404043  | 0.011203214 | -2.832811067 |
| RNU7-26P      | 0.273523001  | 0.243838008 | 2.591391591  | 0.011203589 | -2.832838471 |
| ADIPOR1       | 0.33573154   | 5.000512132 | 2.591129376  | 0.011211507 | -2.833415488 |
| STAT5A        | -0.334312273 | 2.193681119 | -2.590993253 | 0.011215619 | -2.833715014 |
| GPSM3         | -0.544742239 | 3.310835135 | -2.590758896 | 0.011222701 | -2.834230662 |
| RP11-960H2.2  | 0.37537969   | 0.161918253 | 2.590742765  | 0.011223189 | -2.834266153 |
| SLC27A1       | -0.342813062 | 2.178333819 | -2.5903825   | 0.011234085 | -2.835058754 |
| CEP76         | 0.202185834  | 1.365455396 | 2.589507194  | 0.011260598 | -2.836984083 |
| HNRNPRP2      | 0.219786494  | 0.096711112 | 2.587956888  | 0.011307695 | -2.840392798 |
| RP11-126O1.6  | 0.248570302  | 0.109768752 | 2.58735764   | 0.011325948 | -2.841709926 |
| PIKFYVE       | 0.365833477  | 2.145989424 | 2.587234542  | 0.011329701 | -2.841980459 |
| RIC8B         | 0.210387843  | 1.732485135 | 2.587226582  | 0.011329943 | -2.841997953 |
| RP5-1198O20.5 | 0.201066536  | 0.126166842 | 2.587199788  | 0.01133076  | -2.842056838 |

|               |              |             |              |             |              |
|---------------|--------------|-------------|--------------|-------------|--------------|
| HERC2         | 0.275594719  | 2.315173247 | 2.586778813  | 0.011343604 | -2.842981925 |
| AC074121.4    | 0.273737939  | 0.166800892 | 2.586777371  | 0.011343648 | -2.842985093 |
| GYPC          | -0.513327024 | 3.297622211 | -2.586317249 | 0.0113577   | -2.843996061 |
| RFC4          | 0.360883307  | 3.047261699 | 2.586101486  | 0.011364296 | -2.844470076 |
| F13A1         | -0.85589333  | 2.66827671  | -2.585874376 | 0.011371241 | -2.844968983 |
| PARP3         | -0.324878677 | 2.166129844 | -2.584848419 | 0.011402666 | -2.847222316 |
| RN7SKP17      | 0.31459814   | 0.10934551  | 2.584244734  | 0.011421193 | -2.848547849 |
| ZMAT2         | -0.356762249 | 4.813688191 | -2.583868925 | 0.01143274  | -2.849372895 |
| CTD-2522E6.4  | 0.260566702  | 0.302959105 | 2.583405858  | 0.011446983 | -2.850389365 |
| WNT5A-AS1     | 0.4884228    | 1.514532851 | 2.58330081   | 0.011450216 | -2.850619933 |
| AC112497.2    | 0.209252965  | 0.096972926 | 2.582957031  | 0.011460803 | -2.851374432 |
| HLA-E         | -0.481797745 | 6.524086665 | -2.582748679 | 0.011467224 | -2.851831665 |
| MICAL3        | 0.261021096  | 1.043837697 | 2.5824618    | 0.01147607  | -2.852461177 |
| BX842568.2    | 0.296962577  | 0.681799792 | 2.58244121   | 0.011476705 | -2.852506355 |
| THAP5         | 0.321672809  | 2.290334693 | 2.582409892  | 0.011477671 | -2.852575075 |
| CREBL2        | -0.342576788 | 3.263008526 | -2.582367829 | 0.011478969 | -2.852667369 |
| ING4          | -0.333776675 | 2.961868507 | -2.581941657 | 0.011492124 | -2.853602398 |
| MIR543        | 0.336301699  | 0.120711837 | 2.581873762  | 0.011494221 | -2.853751349 |
| AC134772.1    | 0.520705319  | 0.563264141 | 2.580969582  | 0.011522182 | -2.855734665 |
| RP11-696L21.2 | 0.386626039  | 0.324833585 | 2.580855174  | 0.011525724 | -2.855985575 |
| RP11-21J7.1   | 0.22751212   | 0.099956116 | 2.58070117   | 0.011530494 | -2.856323311 |
| AP000560.3    | 0.219100979  | 0.412135478 | 2.580322924  | 0.011542217 | -2.857152746 |
| KB-1980E6.2   | 0.220720524  | 0.236361928 | 2.5803222    | 0.011542239 | -2.857154332 |
| RP11-210K20.2 | 0.431755946  | 0.35985133  | 2.580021387  | 0.01155157  | -2.857813895 |
| HHEX          | -0.348925211 | 1.565243858 | -2.579614531 | 0.0115642   | -2.858705863 |
| KB-1410C5.2   | 0.210248528  | 0.079031226 | 2.579552021  | 0.011566142 | -2.858842896 |
| FNDC7         | 0.236538197  | 0.125581083 | 2.579222097  | 0.011576395 | -2.859566099 |
| RNU1-108P     | 0.264410813  | 0.172709734 | 2.57914566   | 0.011578771 | -2.859733642 |
| AHCYL2        | 0.398895299  | 2.340995459 | 2.57858231   | 0.011596301 | -2.860968313 |
| RP11-420A6.2  | 0.210579811  | 0.359957086 | 2.57853775   | 0.011597688 | -2.861065964 |
| AC010971.1    | 0.250297606  | 0.097371905 | 2.578215654  | 0.011607722 | -2.861771775 |
| RNU6-168P     | 0.286206555  | 0.106225456 | 2.577387483  | 0.011633558 | -2.863586212 |
| SLC7A7        | -0.48491597  | 2.2074804   | -2.576996856 | 0.011645762 | -2.864441864 |

|                   |              |             |              |             |              |
|-------------------|--------------|-------------|--------------|-------------|--------------|
| CTD-2377D24.2     | 0.261399292  | 0.124923626 | 2.576906715  | 0.01164858  | -2.864639298 |
| RPL7P10           | 0.304737238  | 0.553689592 | 2.576830968  | 0.011650949 | -2.864805201 |
| DHRS1             | -0.298641578 | 1.857611653 | -2.576825137 | 0.011651131 | -2.864817972 |
| SERBP1P6          | 0.258722542  | 0.867547051 | 2.576363339  | 0.011665579 | -2.865829323 |
| NIP7              | -0.301455614 | 3.307658609 | -2.576305981 | 0.011667375 | -2.86595493  |
| AC132068.1        | 0.301242076  | 0.168759758 | 2.576085311  | 0.011674286 | -2.866438139 |
| MIR3913-2         | 0.211409292  | 0.067983242 | 2.57348469   | 0.011756011 | -2.872130195 |
| MIR4748           | 0.359018921  | 0.450575677 | 2.573073079  | 0.011768993 | -2.873030655 |
| CTD-2293H3.2      | 0.242299386  | 0.254492366 | 2.57291865   | 0.011773867 | -2.873336846 |
| CD160             | 0.226837163  | 0.395262877 | 2.572838623  | 0.011776393 | -2.873543508 |
| AC022909.1        | 0.441078486  | 0.202398066 | 2.572471794  | 0.011787981 | -2.874345834 |
| XXbac-BPG154L12.4 | 0.258487384  | 0.146372685 | 2.572229153  | 0.011795651 | -2.874876485 |
| RP11-448A19.1     | 0.207395132  | 0.572197462 | 2.572201172  | 0.011796535 | -2.874937677 |
| AP000289.6        | 0.209758824  | 0.074120089 | 2.57209112   | 0.011800016 | -2.875178343 |
| RN7SL679P         | 0.321093931  | 0.155330712 | 2.57196508   | 0.011804003 | -2.875453961 |
| RNU6-981P         | 0.396731325  | 0.257990767 | 2.571708265  | 0.011812131 | -2.876015515 |
| ZNF680            | 0.265278472  | 1.348883501 | 2.571307373  | 0.01182483  | -2.876892014 |
| CTC-518B2.9       | 0.204126803  | 0.075139946 | 2.570880495  | 0.011838365 | -2.877825202 |
| RP11-7807.2       | -0.332631381 | 0.998732053 | -2.570231221 | 0.011858978 | -2.879244314 |
| NDUFA12           | -0.357912331 | 4.647231995 | -2.569940774 | 0.01186821  | -2.879879041 |
| AC027319.1        | -0.209565121 | 0.237724179 | -2.569896917 | 0.011869604 | -2.87997488  |
| HSPE1P6           | 0.313733345  | 0.509079697 | 2.569858569  | 0.011870824 | -2.880058678 |
| LINC01358         | -0.33662188  | 0.702734922 | -2.569354714 | 0.011886857 | -2.881159604 |
| RN7SL259P         | 0.232143943  | 0.094150616 | 2.568974207  | 0.011898978 | -2.881990894 |
| RP11-1277A3.2     | 0.249088609  | 0.583807555 | 2.568638462  | 0.011909682 | -2.882724306 |
| C3orf70           | 0.515922436  | 1.45447919  | 2.568600284  | 0.0119109   | -2.882807697 |
| RP11-412D9.4      | 0.314875112  | 1.207215076 | 2.567832595  | 0.011935411 | -2.884484336 |
| KMT2D             | 0.30933382   | 2.54924386  | 2.567675032  | 0.011940447 | -2.884828401 |
| GSKIP             | -0.268397316 | 1.962251823 | -2.567299071 | 0.011952472 | -2.885649306 |
| RPL21P126         | 0.214112808  | 0.08764824  | 2.567215027  | 0.011955162 | -2.885832801 |
| P4HA1             | 0.562312117  | 5.917539045 | 2.566956846  | 0.011963427 | -2.886396458 |
| RP5-1022P6.4      | 0.218239196  | 0.119868738 | 2.566744202  | 0.011970239 | -2.886860666 |
| CRBN              | -0.255747721 | 1.959061201 | -2.566426604 | 0.011980419 | -2.887553928 |

|                |              |             |              |             |              |
|----------------|--------------|-------------|--------------|-------------|--------------|
| SEC24A         | 0.310057747  | 2.868778762 | 2.566382391  | 0.011981837 | -2.887650433 |
| CTD-2026J24.1  | 0.233385613  | 0.088758432 | 2.566237025  | 0.0119865   | -2.887967714 |
| CD72           | -0.295513709 | 0.962987216 | -2.566039956 | 0.011992824 | -2.88839782  |
| RP11-697M17.2  | 0.274538072  | 0.210115473 | 2.565855275  | 0.011998752 | -2.888800863 |
| AL360074.1     | 0.347940567  | 0.558215064 | 2.565740302  | 0.012002445 | -2.889051764 |
| TMEM39A        | 0.303449408  | 3.33891705  | 2.565482811  | 0.012010718 | -2.889613643 |
| TAF4           | 0.232986663  | 1.756148838 | 2.565382311  | 0.012013948 | -2.889832934 |
| ZNF525         | 0.269100017  | 1.401246193 | 2.565160304  | 0.012021087 | -2.890317329 |
| RP11-151H2.1   | 0.26773621   | 0.20804626  | 2.565066421  | 0.012024107 | -2.890522161 |
| CACFD1         | -0.341508254 | 2.341551294 | -2.564989806 | 0.012026572 | -2.890689312 |
| RNA5SP432      | 0.221003826  | 0.108525899 | 2.564687724  | 0.012036296 | -2.891348327 |
| GIGYF2         | 0.25985434   | 2.359950188 | 2.564081199  | 0.012055841 | -2.892671308 |
| CBY1           | -0.32240506  | 2.947382908 | -2.564057287 | 0.012056612 | -2.892723461 |
| RP11-479J7.1   | 0.271458468  | 0.112948673 | 2.56391663   | 0.012061149 | -2.893030228 |
| SRGAP2         | 0.246123633  | 2.456515087 | 2.563864556  | 0.012062829 | -2.893143798 |
| MIR491         | 0.205416876  | 0.107761673 | 2.563778753  | 0.012065598 | -2.893330919 |
| GART           | 0.367059608  | 3.533224409 | 2.563511139  | 0.012074237 | -2.893914509 |
| RP1-163M9.7    | 0.202638486  | 0.126096049 | 2.563181008  | 0.012084902 | -2.894634361 |
| KIF11          | 0.428990327  | 3.291944111 | 2.563009354  | 0.012090451 | -2.895008622 |
| U5             | 0.241285988  | 0.105135863 | 2.562779993  | 0.012097869 | -2.895508668 |
| RP11-549L6.3   | 0.284036163  | 0.237020911 | 2.562728563  | 0.012099533 | -2.89562079  |
| DGKE           | 0.211192143  | 0.708123296 | 2.562553958  | 0.012105183 | -2.896001428 |
| RP11-397H6.1   | 0.234958991  | 0.137342878 | 2.562477675  | 0.012107652 | -2.896167718 |
| AC099799.1     | 0.232614199  | 0.112295159 | 2.562215804  | 0.012116132 | -2.89673854  |
| RP11-1023L17.2 | 0.272601542  | 0.353766342 | 2.561078777  | 0.012153015 | -2.899216437 |
| ATL3           | 0.328484251  | 4.059114402 | 2.560695457  | 0.012165472 | -2.900051587 |
| RP11-103J17.1  | 0.259352698  | 0.155806755 | 2.560542516  | 0.012170446 | -2.900384774 |
| RP11-235E17.4  | 0.233660815  | 0.3476673   | 2.560417054  | 0.012174527 | -2.900658086 |
| ALDH1L2        | 0.49977701   | 2.784524202 | 2.560392689  | 0.01217532  | -2.900711163 |
| RP11-90P5.1    | 0.217779193  | 0.220979791 | 2.560250141  | 0.012179959 | -2.901021677 |
| CD300LF        | -0.272106124 | 0.662927937 | -2.560172354 | 0.012182491 | -2.901191117 |
| RP11-439C8.1   | 0.286688435  | 0.167054843 | 2.560033048  | 0.012187026 | -2.901494549 |
| HIATL2         | 0.347998682  | 2.42803842  | 2.559711711  | 0.012197494 | -2.90219442  |

|               |              |             |              |             |              |
|---------------|--------------|-------------|--------------|-------------|--------------|
| ZNF501        | -0.275016442 | 1.152753583 | -2.559648668 | 0.012199549 | -2.902331717 |
| KDM5C-IT1     | 0.222226918  | 0.230070905 | 2.559050835  | 0.012219049 | -2.903633572 |
| PTBP3         | 0.271100469  | 3.518441969 | 2.557940864  | 0.012255329 | -2.906049988 |
| FNTAP2        | 0.227661207  | 0.315797549 | 2.557760705  | 0.012261227 | -2.906442111 |
| MIR550A2      | 0.288029195  | 0.250512207 | 2.557707181  | 0.012262979 | -2.906558603 |
| TMEM209       | 0.334545533  | 2.717133081 | 2.557606983  | 0.012266261 | -2.906776674 |
| RP1-90J20.14  | 0.224572393  | 0.082197245 | 2.557341924  | 0.012274946 | -2.907353515 |
| RP1-63P18.2   | 0.311307082  | 0.182143843 | 2.557322181  | 0.012275593 | -2.907396477 |
| CTC-232P5.1   | 0.206559737  | 0.542088075 | 2.556953856  | 0.012287671 | -2.908197964 |
| AC093680.1    | 0.341287401  | 0.111371099 | 2.555450273  | 0.012337088 | -2.911468787 |
| RP11-739N10.1 | 0.200856317  | 0.097460099 | 2.555155504  | 0.012346797 | -2.912109823 |
| RP11-373I8.1  | 0.227354447  | 0.08111343  | 2.554920647  | 0.012354538 | -2.912620523 |
| RNU6-1086P    | 0.260627477  | 0.172973237 | 2.554766925  | 0.012359606 | -2.912954771 |
| ACVR1C        | 0.219991342  | 0.396357761 | 2.554695447  | 0.012361964 | -2.913110186 |
| CTC-422A18.1  | 0.298265454  | 0.168115346 | 2.553964862  | 0.012386084 | -2.914698479 |
| PVRL3-AS1     | 0.458461704  | 0.612507463 | 2.553783075  | 0.012392092 | -2.915093625 |
| ACP2          | -0.285016044 | 4.001267649 | -2.553649154 | 0.01239652  | -2.915384711 |
| RP11-708L7.7  | 0.227354402  | 0.196532865 | 2.55335825   | 0.012406143 | -2.916016964 |
| RN7SKP160     | 0.314741347  | 0.465046559 | 2.553344877  | 0.012406585 | -2.916046027 |
| C10orf54      | -0.47878475  | 2.56002386  | -2.552869103 | 0.012422339 | -2.91707994  |
| RN7SL811P     | 0.211071094  | 0.10564871  | 2.552097781  | 0.012447917 | -2.918755769 |
| RFXANK        | -0.332937603 | 3.831945526 | -2.551953873 | 0.012452694 | -2.919068387 |
| RP11-436M15.3 | 0.24056801   | 0.267466759 | 2.551428407  | 0.012470153 | -2.920209749 |
| RNU7-105P     | 0.601270079  | 0.251560541 | 2.551206617  | 0.012477528 | -2.92069144  |
| CHRNA7        | 0.202503965  | 0.369356885 | 2.550325271  | 0.012506876 | -2.922605222 |
| TST           | -0.39480685  | 2.666483476 | -2.550303951 | 0.012507586 | -2.92265151  |
| RP11-274B21.4 | 0.5245615    | 3.321765828 | 2.54987613   | 0.012521855 | -2.923580286 |
| FAM219B       | 0.260497059  | 1.619896609 | 2.549156806  | 0.012545879 | -2.925141599 |
| PRRX2-AS1     | 0.229859375  | 0.399118831 | 2.5486159    | 0.012563972 | -2.926315405 |
| MRPL35P3      | 0.239386222  | 0.346703997 | 2.548424473  | 0.012570381 | -2.926730763 |
| AC107072.2    | 0.275308043  | 0.250897712 | 2.548374474  | 0.012572055 | -2.926839249 |
| GIMAP7        | -0.558855789 | 2.222837912 | -2.547996174 | 0.01258473  | -2.927659995 |
| CXCR3         | -0.39807054  | 0.643486388 | -2.547481467 | 0.012601994 | -2.928776522 |

|                |              |             |              |             |              |
|----------------|--------------|-------------|--------------|-------------|--------------|
| CCDC15         | 0.294026144  | 1.220694254 | 2.546742774  | 0.012626808 | -2.930378593 |
| RP11-1018N14.1 | 0.215298875  | 0.083150966 | 2.546700043  | 0.012628245 | -2.930471256 |
| RNU1-112P      | 0.34233788   | 0.163310051 | 2.546025865  | 0.012650932 | -2.931933043 |
| C1orf27        | 0.27901013   | 2.405424134 | 2.545955298  | 0.012653309 | -2.93208603  |
| AC087392.1     | 0.538751717  | 0.513476268 | 2.545705163  | 0.012661737 | -2.932628289 |
| RAB26          | 0.256657744  | 0.422680971 | 2.545344293  | 0.012673905 | -2.933410528 |
| RP11-158L12.4  | 0.235591227  | 0.646585874 | 2.545320555  | 0.012674706 | -2.93346198  |
| RNU6-409P      | 0.262626186  | 0.187927642 | 2.54531601   | 0.01267486  | -2.933471832 |
| TBX20          | 0.427115997  | 0.636664873 | 2.545119605  | 0.012681487 | -2.933897524 |
| AC091042.1     | 0.261053288  | 0.093971493 | 2.544765932  | 0.01269343  | -2.934664013 |
| AC144836.1     | 0.269805118  | 0.199821176 | 2.544402374  | 0.012705716 | -2.935451831 |
| FBXO7          | -0.249265853 | 3.459796457 | -2.543979686 | 0.012720015 | -2.936367661 |
| TMEM47         | 0.708988675  | 3.327123555 | 2.543907218  | 0.012722468 | -2.936524664 |
| CD209          | -0.558585303 | 1.886414594 | -2.543289262 | 0.012743401 | -2.937863314 |
| RNU6-1333P     | 0.26256789   | 0.158299354 | 2.54308402   | 0.012750361 | -2.938307858 |
| ZDHHC4         | -0.365195519 | 3.290250743 | -2.542856906 | 0.012758066 | -2.938799742 |
| TRIM26BP       | 0.219716125  | 0.192700109 | 2.54207029   | 0.012784786 | -2.940503106 |
| RP11-185B14.1  | 0.27266257   | 0.153605304 | 2.542027275  | 0.012786248 | -2.940596239 |
| CIITA          | -0.289430616 | 0.91860466  | -2.541703739 | 0.012797254 | -2.941296696 |
| RP4-728D4.3    | 0.230567274  | 0.18725112  | 2.541655088  | 0.012798909 | -2.941402017 |
| STK3           | 0.257358923  | 1.759872176 | 2.541574418  | 0.012801655 | -2.941576653 |
| RNU6-696P      | 0.374859121  | 0.210371907 | 2.541427274  | 0.012806665 | -2.941895182 |
| RP4-797C5.2    | 0.308686502  | 0.191821611 | 2.541405261  | 0.012807415 | -2.941942833 |
| HJURP          | 0.372620315  | 2.893375058 | 2.541038824  | 0.012819899 | -2.942735998 |
| TMEM9B         | -0.253644158 | 3.600603865 | -2.540480146 | 0.012838953 | -2.94394509  |
| RNU6-42P       | 0.369362177  | 0.624933683 | 2.540355184  | 0.012843219 | -2.944215502 |
| PRR11          | 0.412380283  | 4.307453233 | 2.540345427  | 0.012843552 | -2.944236615 |
| AC005048.1     | 0.311563311  | 0.092052796 | 2.54032926   | 0.012844104 | -2.944271598 |
| TTC26          | 0.254153475  | 1.586923549 | 2.540208228  | 0.012848237 | -2.944533492 |
| C5orf28        | 0.327071732  | 2.23861457  | 2.540012069  | 0.012854937 | -2.944957929 |
| RP11-492D6.3   | 0.207205123  | 0.157380803 | 2.539852825  | 0.012860379 | -2.945302469 |
| RP11-216P16.4  | 0.206888134  | 0.129243803 | 2.539780533  | 0.012862851 | -2.945458875 |
| SENP6          | 0.298054337  | 2.493254947 | 2.539720454  | 0.012864905 | -2.945588854 |

|               |              |             |              |             |              |
|---------------|--------------|-------------|--------------|-------------|--------------|
| RN7SKP85      | 0.256397467  | 0.147979922 | 2.539516417  | 0.012871883 | -2.946030262 |
| RNU6-273P     | 0.392968527  | 0.205385513 | 2.539413518  | 0.012875403 | -2.946252859 |
| AC006126.3    | 0.219589068  | 0.363440433 | 2.539178719  | 0.012883439 | -2.946760763 |
| RP5-884C9.3   | 0.23119367   | 0.091771993 | 2.538937108  | 0.012891714 | -2.947283361 |
| LA16c-380H5.3 | 0.213149299  | 0.107126808 | 2.538719867  | 0.012899157 | -2.947753211 |
| GZMH          | -0.450117154 | 0.616367483 | -2.538528754 | 0.012905709 | -2.948166522 |
| CCDC12        | -0.301384924 | 2.522816256 | -2.538329982 | 0.012912526 | -2.94859637  |
| MTCO2P1       | 0.264699116  | 0.162751741 | 2.538293589  | 0.012913775 | -2.948675067 |
| RP11-96O20.2  | 0.406411561  | 0.19621863  | 2.537990855  | 0.012924165 | -2.94932967  |
| STX8          | -0.568204363 | 2.800410148 | -2.53778926  | 0.012931088 | -2.949765544 |
| HSPE1P14      | 0.269678053  | 0.183664327 | 2.537659465  | 0.012935547 | -2.950046162 |
| RP11-206L10.2 | 0.244403482  | 0.674698409 | 2.537497111  | 0.012941127 | -2.950397155 |
| RN7SL156P     | 0.209225491  | 0.09244322  | 2.537299163  | 0.012947932 | -2.950825073 |
| RP11-252I14.1 | 0.245683997  | 0.16883674  | 2.537285775  | 0.012948393 | -2.950854012 |
| RNU7-49P      | 0.525951433  | 0.968719052 | 2.537145537  | 0.012953217 | -2.951157157 |
| CENPE         | 0.38042243   | 2.284653982 | 2.536714066  | 0.012968068 | -2.952089751 |
| RP11-342K2.1  | 0.296576522  | 0.893739858 | 2.536620392  | 0.012971294 | -2.952292202 |
| RAC1          | -0.334262914 | 7.040483861 | -2.536078251 | 0.012989981 | -2.953463775 |
| CTD-3032H12.2 | 0.428062623  | 0.662970523 | 2.535862073  | 0.012997439 | -2.953930879 |
| RP11-318G8.2  | 0.249631738  | 0.176231546 | 2.535799312  | 0.012999605 | -2.954066482 |
| RNU6-432P     | 0.260739719  | 0.124630862 | 2.535751577  | 0.013001253 | -2.954169617 |
| RP11-344H11.5 | 0.333721778  | 0.171381472 | 2.535439847  | 0.013012017 | -2.954843099 |
| AC044907.1    | 0.667158154  | 1.578774435 | 2.535439016  | 0.013012045 | -2.954844895 |
| TMEM120B      | 0.372858986  | 1.923961019 | 2.534887744  | 0.013031101 | -2.956035725 |
| RP11-94P14.1  | 0.220734397  | 0.244564989 | 2.534782453  | 0.013034743 | -2.956263145 |
| DOK3          | -0.352688668 | 1.587378995 | -2.534636401 | 0.013039797 | -2.956578592 |
| MCM3AP-AS1    | 0.215278017  | 0.682555759 | 2.53454237   | 0.013043052 | -2.956781673 |
| DEFB109P1     | 0.269192152  | 0.170161209 | 2.534484117  | 0.013045068 | -2.956907482 |
| TRBV16        | 0.325828624  | 0.122061633 | 2.534363402  | 0.013049248 | -2.95716818  |
| GSN-AS1       | 0.322265568  | 0.908274718 | 2.534321997  | 0.013050682 | -2.957257595 |
| LINC01486     | 0.291004213  | 0.115030612 | 2.534247996  | 0.013053246 | -2.957417403 |
| RP11-313I2.11 | 0.307290422  | 0.11848656  | 2.533619769  | 0.013075025 | -2.958773908 |
| GATA3         | -0.424997049 | 0.754857019 | -2.533487556 | 0.013079612 | -2.959059354 |

|              |              |             |              |             |              |
|--------------|--------------|-------------|--------------|-------------|--------------|
| CDC42BPA     | 0.306228613  | 2.646988218 | 2.533483983  | 0.013079736 | -2.959067068 |
| RPL36P20     | 0.32038548   | 0.124713885 | 2.533465397  | 0.013080381 | -2.959107194 |
| RNU6-119P    | 0.255252874  | 0.075415622 | 2.533382337  | 0.013083264 | -2.959286512 |
| KLC3         | 0.216653914  | 0.28388894  | 2.532272268  | 0.01312185  | -2.961682551 |
| HIGD1B       | -0.264282234 | 0.801113302 | -2.532137982 | 0.013126524 | -2.961972341 |
| RP11-16E23.3 | 0.298355399  | 0.3216269   | 2.531953545  | 0.013132947 | -2.962370337 |
| RNU6-487P    | 0.281033182  | 0.110190917 | 2.531585205  | 0.013145783 | -2.963165101 |
| RP11-449M6.3 | 0.244578949  | 0.085148239 | 2.531558992  | 0.013146697 | -2.963221657 |
| RNU6-542P    | 0.273918915  | 0.123598884 | 2.531029256  | 0.013165177 | -2.964364483 |
| GNG5P3       | 0.269169382  | 0.308968725 | 2.530794282  | 0.013173382 | -2.964871338 |
| AC142293.3   | 0.244198075  | 0.117827102 | 2.530573958  | 0.01318108  | -2.965346556 |
| RP13-685P2.8 | 0.267429441  | 0.152045951 | 2.529256908  | 0.013227179 | -2.968186576 |
| E2F7         | 0.440725966  | 1.779680815 | 2.528637607  | 0.013248905 | -2.969521571 |
| NBPF8P       | 0.281168886  | 1.544665788 | 2.528391272  | 0.013257556 | -2.970052506 |
| RP11-266K4.9 | 0.344580786  | 0.652017828 | 2.528276615  | 0.013261585 | -2.970299615 |
| BRWD1-IT1    | 0.200879209  | 0.257352212 | 2.528083149  | 0.013268384 | -2.970716551 |
| RNU1-7P      | 0.336433351  | 0.119006188 | 2.528017889  | 0.013270679 | -2.970857188 |
| AL359709.1   | 0.332735918  | 0.157507239 | 2.527990411  | 0.013271645 | -2.970916402 |
| CA1          | 0.218624309  | 0.113616205 | 2.527135129  | 0.013301749 | -2.97275923  |
| ST13P14      | 0.223298666  | 0.090007638 | 2.52707709   | 0.013303794 | -2.972884264 |
| IL18R1       | 0.365653437  | 0.742411967 | 2.526966419  | 0.013307695 | -2.973122676 |
| SIPA1L3      | 0.285098637  | 2.338260835 | 2.52645395   | 0.01332577  | -2.974226549 |
| FUBP3        | 0.300767243  | 3.45009506  | 2.526400822  | 0.013327645 | -2.974340978 |
| LPPR3        | -0.68936439  | 1.065783444 | -2.525934089 | 0.013344128 | -2.975346148 |
| CXCR6        | -0.22494526  | 0.311184576 | -2.525914267 | 0.013344828 | -2.975388835 |
| RP11-98D18.7 | 0.285824329  | 0.133499315 | 2.52584381   | 0.013347318 | -2.975540558 |
| BLNK         | -0.27680769  | 0.79198972  | -2.525528127 | 0.013358479 | -2.976220313 |
| ALPK2        | 0.298635817  | 0.535780749 | 2.525502907  | 0.013359371 | -2.976274615 |
| RP11-315O6.2 | 0.2549162    | 0.091851549 | 2.525457184  | 0.013360989 | -2.976373063 |
| CBX3P1       | 0.35833425   | 0.520862992 | 2.525252208  | 0.013368242 | -2.976814384 |
| SYNJ1        | 0.296128561  | 1.751515331 | 2.52473309   | 0.013386626 | -2.977931932 |
| POLE2        | 0.367931942  | 2.009760342 | 2.524245063  | 0.01340393  | -2.97898237  |
| RP11-285C1.2 | 0.25156096   | 0.1292868   | 2.524080349  | 0.013409774 | -2.979336862 |



|               |              |             |              |             |              |
|---------------|--------------|-------------|--------------|-------------|--------------|
| VHL           | -0.321450529 | 4.041314444 | -2.523658495 | 0.013424754 | -2.980244678 |
| RP11-662J14.2 | 0.204683797  | 0.113715783 | 2.523469861  | 0.013431457 | -2.980650569 |
| FAM64A        | 0.448022025  | 2.286162187 | 2.523182036  | 0.013441691 | -2.981269847 |
| ATAD2B        | 0.213689239  | 1.413820907 | 2.523161641  | 0.013442416 | -2.981313725 |
| RNU6-623P     | 0.295174026  | 0.463271962 | 2.523021852  | 0.013447389 | -2.981614467 |
| SLC16A8       | 0.642484109  | 1.344080541 | 2.522889997  | 0.013452082 | -2.981898128 |
| RP11-390F4.3  | 0.262682101  | 0.361390172 | 2.522339877  | 0.013471674 | -2.983081466 |
| RP11-887P2.6  | 0.206283388  | 0.181698344 | 2.522012575  | 0.013483343 | -2.983785407 |
| PITPNM3       | 0.310969902  | 0.628391429 | 2.521994623  | 0.013483984 | -2.983824014 |
| RP11-781P14.3 | 0.357186277  | 0.176022687 | 2.52168728   | 0.01349495  | -2.984484954 |
| AC069542.1    | 0.250930406  | 0.180252686 | 2.521455611  | 0.013503221 | -2.98498311  |
| RP11-463C8.5  | 0.260232371  | 0.105925017 | 2.521391122  | 0.013505525 | -2.985121775 |
| ST3GAL4-AS1   | 0.210650705  | 1.187966993 | 2.52135319   | 0.01350688  | -2.985203334 |
| RNU7-14P      | 0.355112473  | 0.12803684  | 2.521171808  | 0.013513361 | -2.985593319 |
| RP11-672A2.7  | 0.241429321  | 0.160454178 | 2.521010681  | 0.01351912  | -2.985939734 |
| CTRC          | 0.306542528  | 0.152231283 | 2.520635575  | 0.013532536 | -2.98674612  |
| RP3-477M7.5   | 0.201046203  | 0.270771672 | 2.520579454  | 0.013534545 | -2.986866758 |
| GPR180        | 0.364916667  | 2.102293998 | 2.520545553  | 0.013535758 | -2.986939629 |
| ARRDC2        | -0.262269969 | 2.721353778 | -2.520209112 | 0.013547804 | -2.987662786 |
| RP13-643D4.1  | 0.200409588  | 0.076762951 | 2.519938326  | 0.013557507 | -2.988244763 |
| RP3-399J4.4   | 0.261656113  | 0.100451681 | 2.519700042  | 0.01356605  | -2.98875684  |
| RP11-479O9.2  | 0.241650623  | 0.371827995 | 2.519498193  | 0.013573291 | -2.989190587 |
| NFE2L3        | -0.38904919  | 1.327830695 | -2.519308996 | 0.013580081 | -2.98959712  |
| LRRC37A14P    | 0.334306936  | 0.237904276 | 2.518640729  | 0.013604088 | -2.991032832 |
| TMEM65        | 0.397175853  | 3.050614064 | 2.517954909  | 0.013628766 | -2.99250592  |
| TMCO3         | 0.457060356  | 2.652018667 | 2.517913857  | 0.013630244 | -2.992594085 |
| CTD-2130O13.1 | 0.200632979  | 0.084177846 | 2.516898527  | 0.013666856 | -2.994774276 |
| DOCK2         | -0.291299516 | 0.954151982 | -2.516714839 | 0.013673489 | -2.995168624 |
| HLX-AS1       | 0.24614549   | 0.297357339 | 2.516034551  | 0.013698079 | -2.996628878 |
| RP11-250B2.2  | 0.220300154  | 0.310235144 | 2.515872223  | 0.013703953 | -2.99697727  |
| RP11-665C16.5 | 0.238867133  | 0.242013796 | 2.515663445  | 0.01371151  | -2.997425325 |
| RP11-514F8.2  | 0.213118725  | 0.08108465  | 2.515262758  | 0.013726025 | -2.998285144 |
| RP11-658F2.8  | 0.28576931   | 1.598497004 | 2.51473892   | 0.013745023 | -2.999409052 |

|               |              |             |              |             |              |
|---------------|--------------|-------------|--------------|-------------|--------------|
| AC006373.1    | 0.687738665  | 0.919572169 | 2.51435516   | 0.013758955 | -3.000232291 |
| ARHGAP42      | 0.3596512    | 1.881660836 | 2.51435349   | 0.013759015 | -3.000235873 |
| RNU6-133P     | 0.295646692  | 0.105436407 | 2.514266946  | 0.013762159 | -3.000421513 |
| WI2-87327B8.2 | 0.286889509  | 0.397920874 | 2.514083725  | 0.013768817 | -3.000814507 |
| IDI2-AS1      | 0.244126703  | 0.25893995  | 2.513714911  | 0.013782227 | -3.001605513 |
| SAMM50        | -0.26325521  | 2.851042275 | -2.513549796 | 0.013788234 | -3.001959606 |
| CICP14        | 0.358127726  | 1.985992446 | 2.513273317  | 0.013798299 | -3.002552481 |
| TRAJ39        | 0.542868084  | 0.377122985 | 2.5130705    | 0.013805686 | -3.00298736  |
| RP11-104E19.1 | 0.236397549  | 0.207998453 | 2.512732333  | 0.013818011 | -3.003712389 |
| TRIM36-IT1    | 0.215116171  | 0.099318596 | 2.512184205  | 0.013838009 | -3.004887398 |
| RP11-137F15.1 | 0.206960488  | 0.131565875 | 2.512144376  | 0.013839463 | -3.00497277  |
| GAS7          | -0.524173685 | 1.642729848 | -2.511312824 | 0.013869854 | -3.006754908 |
| EEF1B2P2      | 0.376369824  | 0.917081074 | 2.511130073  | 0.013876541 | -3.007146503 |
| CTC-482H14.5  | 0.214272193  | 0.24825706  | 2.511124657  | 0.01387674  | -3.007158108 |
| RP11-274B21.2 | 0.446273426  | 2.660972077 | 2.51091416   | 0.013884446 | -3.007609125 |
| RP11-23D5.1   | 0.246982149  | 0.089879678 | 2.509979827  | 0.013918697 | -3.009610666 |
| RNU6-818P     | 0.327385152  | 0.149351837 | 2.509624582  | 0.01393174  | -3.01037151  |
| RP11-693L9.2  | 0.271888903  | 0.128261965 | 2.50935044   | 0.013941812 | -3.01095859  |
| RNU6-1040P    | 0.314249444  | 0.155651846 | 2.509316063  | 0.013943076 | -3.011032206 |
| CH17-140K24.1 | 0.256335618  | 0.09628832  | 2.509143968  | 0.013949403 | -3.011400719 |
| RP11-365O16.3 | 0.217528134  | 0.289619956 | 2.509096865  | 0.013951135 | -3.011501577 |
| RASSF4        | -0.489300557 | 1.967648391 | -2.508868379 | 0.01395954  | -3.0119908   |
| CTD-2623N2.5  | 0.220753074  | 0.167917901 | 2.508859158  | 0.013959879 | -3.012010542 |
| NCRUPAR_1     | 0.258690996  | 0.135544125 | 2.508614271  | 0.013968893 | -3.012534839 |
| ZBTB6         | 0.278512996  | 2.065934655 | 2.508503421  | 0.013972975 | -3.012772151 |
| RP1-17K7.2    | 0.218558573  | 0.104114215 | 2.508299345  | 0.013980492 | -3.01320902  |
| RNU6-24P      | 0.268291296  | 0.211997263 | 2.508020942  | 0.013990754 | -3.013804957 |
| POLI          | 0.21599788   | 1.152139853 | 2.507947172  | 0.013993474 | -3.013962857 |
| AL359546.1    | 0.334659194  | 0.14674642  | 2.507358278  | 0.014015205 | -3.015223197 |
| HMGA1P5       | 0.322274963  | 0.209768366 | 2.506775868  | 0.014036727 | -3.01646941  |
| RP11-515C16.7 | 0.22519018   | 0.095510976 | 2.506678054  | 0.014040345 | -3.016678685 |
| TCEA3         | 0.578920859  | 3.935227015 | 2.506638168  | 0.01404182  | -3.016764019 |
| RNU6-1250P    | 0.235827433  | 0.100415799 | 2.506311831  | 0.014053896 | -3.01746216  |

|               |              |             |              |             |              |
|---------------|--------------|-------------|--------------|-------------|--------------|
| ARHGEF17      | 0.368584884  | 3.398257526 | 2.505970362  | 0.014066542 | -3.01819259  |
| SUCLG1        | -0.300828698 | 3.859012306 | -2.505279477 | 0.01409216  | -3.019670187 |
| RN7SL697P     | 0.228605587  | 0.147749786 | 2.505105781  | 0.014098607 | -3.020041618 |
| CTC-246B18.8  | 0.289024687  | 0.750544415 | 2.504849206  | 0.014108135 | -3.020590236 |
| RP13-488H8.1  | 0.262105639  | 0.124955684 | 2.504784313  | 0.014110546 | -3.020728985 |
| ALG9          | 0.217675999  | 1.381886207 | 2.504630639  | 0.014116256 | -3.021057545 |
| COMMD3        | -0.294737524 | 2.328448007 | -2.504327992 | 0.014127509 | -3.021704566 |
| SIGLEC14      | -0.372158855 | 0.869485555 | -2.504281949 | 0.014129221 | -3.021802994 |
| CYCSP27       | 0.22336794   | 0.235521697 | 2.503643482  | 0.014152989 | -3.023167714 |
| HMGNI1P8      | 0.310829321  | 0.308417851 | 2.503577251  | 0.014155456 | -3.023309266 |
| MIR516A2      | 0.248245805  | 0.077123675 | 2.503329627  | 0.014164685 | -3.023838467 |
| CHM           | 0.264949416  | 1.826929865 | 2.503268404  | 0.014166968 | -3.023969303 |
| WASF2         | 0.31752336   | 5.603640125 | 2.503090169  | 0.014173615 | -3.024350177 |
| RP11-407A16.3 | 0.227859537  | 0.186066525 | 2.502774204  | 0.014185405 | -3.025025312 |
| RP11-809N15.2 | 0.239293675  | 0.227258071 | 2.502572038  | 0.014192954 | -3.025457252 |
| RP11-215P8.1  | 0.264972987  | 0.549001053 | 2.502498198  | 0.014195712 | -3.025615008 |
| RP11-57C13.3  | 0.205223611  | 0.07882492  | 2.502305161  | 0.014202925 | -3.026027405 |
| TES           | -0.573084241 | 2.563170742 | -2.502028437 | 0.014213269 | -3.026618538 |
| GIMAP6        | -0.42829146  | 2.007266232 | -2.501862714 | 0.014219468 | -3.026972527 |
| RP11-306K13.1 | 0.248899     | 0.10041168  | 2.501850825  | 0.014219913 | -3.026997922 |
| RNA5SP87      | 0.301078135  | 0.156137475 | 2.501849624  | 0.014219958 | -3.027000486 |
| RP11-96C23.12 | 0.218399077  | 0.094563508 | 2.501504776  | 0.014232864 | -3.027737024 |
| AC005162.5    | 0.232732493  | 0.119001602 | 2.501324948  | 0.014239599 | -3.028121071 |
| LAMTOR4       | -0.38174522  | 4.561093852 | -2.500753094 | 0.014261034 | -3.029342189 |
| RNU4ATAC3P    | 0.246171814  | 0.086755552 | 2.500563759  | 0.014268137 | -3.029746436 |
| SPICE1        | 0.327922604  | 1.463423097 | 2.500098137  | 0.014285619 | -3.030740468 |
| RNU6-315P     | 0.234292079  | 0.359103621 | 2.499944506  | 0.014291392 | -3.031068413 |
| RNU7-9P       | 0.246457343  | 0.122370485 | 2.499338574  | 0.014314179 | -3.03236168  |
| HEBP1         | -0.248659489 | 3.249496289 | -2.499298318 | 0.014315694 | -3.032447591 |
| RP11-354P11.8 | 0.221814962  | 0.348952953 | 2.498887573  | 0.014331161 | -3.033324099 |
| C18orf25      | 0.262305618  | 1.716265024 | 2.498810869  | 0.014334051 | -3.033487767 |
| RNU6ATAC4P    | 0.280867311  | 0.189638534 | 2.498765574  | 0.014335758 | -3.033584415 |
| LAG3          | -0.412948046 | 0.960561096 | -2.498223007 | 0.014356218 | -3.034741987 |

|                |              |             |              |             |              |
|----------------|--------------|-------------|--------------|-------------|--------------|
| MYO1G          | -0.232258733 | 0.553695795 | -2.497865594 | 0.01436971  | -3.035504415 |
| AC005682.5     | 0.321315825  | 1.0207386   | 2.497695917  | 0.014376119 | -3.035866333 |
| RNY4P17        | 0.435587154  | 0.262194077 | 2.497590617  | 0.014380098 | -3.036090926 |
| BNIP3P16       | 0.248349956  | 0.350973198 | 2.49741357   | 0.01438679  | -3.036468529 |
| RN7SKP75       | 0.256751535  | 0.129737877 | 2.496671989  | 0.01441485  | -3.038049916 |
| CTD-3035D6.2   | 0.329585159  | 0.686027478 | 2.496244868  | 0.014431034 | -3.038960549 |
| CTC-575C13.3   | 0.365995329  | 0.208156425 | 2.495542475  | 0.014457683 | -3.040457779 |
| MIR559         | 0.232531579  | 0.119078248 | 2.495465026  | 0.014460624 | -3.04062285  |
| CCDC28B        | -0.284690756 | 2.134384996 | -2.495289701 | 0.014467284 | -3.040996509 |
| RPL23P4        | 0.256515583  | 0.121328054 | 2.49514378   | 0.014472829 | -3.041307483 |
| AC098680.1     | 0.243648344  | 0.075981922 | 2.494779323  | 0.014486688 | -3.042084118 |
| TERT           | 0.231385041  | 0.148814883 | 2.494678114  | 0.014490538 | -3.04229977  |
| TMEM150B       | -0.354233199 | 1.00981511  | -2.494384645 | 0.014501708 | -3.04292504  |
| RP11-1074O12.1 | 0.226394628  | 0.156571717 | 2.494286394  | 0.01450545  | -3.043134361 |
| NDUFA12P1      | 0.269323292  | 0.109966813 | 2.493294755  | 0.014543261 | -3.045246633 |
| RP11-701B6.1   | 0.240468031  | 0.13052959  | 2.492944857  | 0.014556623 | -3.045991771 |
| USP32P3        | 0.796277421  | 1.821518814 | 2.492863093  | 0.014559747 | -3.046165881 |
| MINOS1         | -0.294519098 | 2.718690781 | -2.492764826 | 0.014563503 | -3.046375128 |
| RP11-382D8.3   | 0.207068445  | 0.35542785  | 2.492391802  | 0.014577766 | -3.047169369 |
| PARD3-AS1      | 0.275759568  | 0.48739143  | 2.492125418  | 0.01458796  | -3.047736492 |
| RP11-617O8.1   | 0.226408476  | 0.071231587 | 2.491546353  | 0.014610141 | -3.048969119 |
| P3H2-AS1       | 0.272012345  | 0.290609647 | 2.491412912  | 0.014615257 | -3.049253134 |
| RNU5E-5P       | 0.20423207   | 0.089615796 | 2.491280068  | 0.014620352 | -3.049535866 |
| CHCHD3P3       | 0.212101775  | 0.64675183  | 2.491118995  | 0.014626531 | -3.049878658 |
| RSF1           | 0.303896976  | 2.211253502 | 2.490935485  | 0.014633573 | -3.05026918  |
| RARRES2P3      | 0.300216496  | 0.138089384 | 2.490819725  | 0.014638018 | -3.050515513 |
| ZC3H11A        | 0.287000246  | 3.770943212 | 2.490283589  | 0.014658617 | -3.051656256 |
| AP002954.3     | 0.214556648  | 0.498890022 | 2.490262514  | 0.014659427 | -3.051701094 |
| RP11-72L22.1   | 0.286995647  | 0.143018894 | 2.489764546  | 0.014678584 | -3.052760432 |
| RNU6-959P      | 0.228282815  | 0.127121122 | 2.489636477  | 0.014683514 | -3.053032846 |
| RP11-138E2.1   | 0.419058606  | 0.289503033 | 2.489445633  | 0.014690864 | -3.053438769 |
| RP5-1186P10.1  | 0.21863286   | 0.123086695 | 2.489009927  | 0.014707656 | -3.054365406 |
| RPL23AP82      | -0.276921483 | 1.475067084 | -2.48890172  | 0.014711829 | -3.054595513 |

|                |              |             |              |             |              |
|----------------|--------------|-------------|--------------|-------------|--------------|
| RNU4-45P       | 0.326691853  | 0.149978689 | 2.488654241  | 0.014721378 | -3.055121758 |
| RP11-667M19.10 | 0.28829266   | 0.48866239  | 2.488529574  | 0.014726189 | -3.055386834 |
| C21orf58       | 0.393871123  | 1.66278032  | 2.48846949   | 0.014728509 | -3.055514586 |
| ZNF30          | -0.283871623 | 1.313077541 | -2.488208069 | 0.014738606 | -3.056070394 |
| RPL21P111      | 0.245981019  | 0.17696814  | 2.488115763  | 0.014742172 | -3.056266632 |
| PEX16          | -0.322450769 | 2.661608807 | -2.488115317 | 0.014742189 | -3.056267581 |
| TMCO1          | 0.340747291  | 4.69238094  | 2.487962107  | 0.014748111 | -3.056593288 |
| AC074338.5     | 0.372741535  | 0.160039639 | 2.487819817  | 0.014753612 | -3.056895764 |
| RP11-416H1.1   | 0.346950213  | 0.1966709   | 2.487551019  | 0.014764009 | -3.057467126 |
| CTSD           | -0.446233538 | 8.031544749 | -2.486729623 | 0.014795822 | -3.059212777 |
| ATP6V1E1       | -0.411368463 | 5.010793218 | -2.486357356 | 0.014810261 | -3.060003766 |
| RP11-25I15.2   | 0.203384896  | 0.082145737 | 2.486237714  | 0.014814903 | -3.060257957 |
| RNU6-129P      | 0.255252181  | 0.075415417 | 2.486165256  | 0.014817716 | -3.060411897 |
| RNU6-369P      | 0.236751711  | 0.105783092 | 2.485751986  | 0.014833767 | -3.061289832 |
| TTK            | 0.347625588  | 2.376644396 | 2.485196931  | 0.014855348 | -3.062468774 |
| AL158086.1     | 0.326557193  | 0.110070638 | 2.484648649  | 0.014876694 | -3.063633107 |
| DAP3P1         | 0.294329134  | 0.37516544  | 2.48457027   | 0.014879748 | -3.063799535 |
| NDC80          | 0.378791541  | 3.021473401 | 2.48456113   | 0.014880104 | -3.063818942 |
| AL591610.1     | 0.34558781   | 0.118196428 | 2.484349598  | 0.014888349 | -3.06426808  |
| MIR577         | 0.274939312  | 0.136245797 | 2.484238216  | 0.014892692 | -3.06450456  |
| RP1-206D15.6   | 0.229505801  | 0.553652362 | 2.484207558  | 0.014893887 | -3.064569649 |
| OTC            | 0.204605142  | 0.090615429 | 2.484117256  | 0.014897409 | -3.064761364 |
| RNA5SP349      | 0.213452038  | 0.063065375 | 2.483828163  | 0.014908689 | -3.065375083 |
| RP11-351O1.4   | 0.214637426  | 0.242297118 | 2.48344367   | 0.014923704 | -3.066191231 |
| MIR4293        | 0.233573093  | 0.081379851 | 2.482945477  | 0.014943179 | -3.067248567 |
| BTAF1          | 0.326466997  | 2.307142452 | 2.48277595   | 0.014949811 | -3.067608319 |
| CTD-2102P23.1  | 0.317651207  | 0.717794575 | 2.482658309  | 0.014954415 | -3.067857952 |
| LINC01273      | 0.306086935  | 0.702906219 | 2.482459085  | 0.014962214 | -3.068280681 |
| MRPS21P9       | 0.293070237  | 0.242895093 | 2.482198843  | 0.014972408 | -3.068832838 |
| CLEC2D         | -0.234913665 | 0.952022805 | -2.48193706  | 0.014982668 | -3.069388215 |
| CTD-2659N19.4  | 0.38490608   | 0.579727418 | 2.481802784  | 0.014987934 | -3.069673065 |
| RP11-554D14.5  | 0.213333548  | 0.0783185   | 2.481721864  | 0.014991107 | -3.06984472  |
| RP11-158M2.3   | 0.291628999  | 0.459441763 | 2.481281111  | 0.015008405 | -3.070779602 |

|                |              |             |              |             |              |
|----------------|--------------|-------------|--------------|-------------|--------------|
| RP11-223J15.2  | 0.215921756  | 0.083770443 | 2.480876396  | 0.015024305 | -3.071637918 |
| EMC2           | -0.332130873 | 2.993818868 | -2.480842672 | 0.01502563  | -3.071709435 |
| RP11-569G9.7   | 0.295684953  | 0.140653028 | 2.480732315  | 0.015029969 | -3.071943457 |
| RP11-767N6.7   | -0.317339276 | 2.098262547 | -2.480567045 | 0.015036468 | -3.072293906 |
| MIR5003        | 0.241530817  | 0.186335796 | 2.480489046  | 0.015039536 | -3.072459296 |
| TRBV28         | -0.499947044 | 0.710694005 | -2.48035578  | 0.015044779 | -3.072741862 |
| RPL19P13       | 0.395570449  | 0.186680735 | 2.480103812  | 0.015054698 | -3.073276078 |
| RP11-497D6.3   | 0.341904022  | 0.18056959  | 2.479885801  | 0.015063284 | -3.07373826  |
| LIMK1          | -0.346571639 | 3.321065489 | -2.479825464 | 0.015065661 | -3.073866167 |
| PBDC1          | -0.396372205 | 3.878737531 | -2.479396032 | 0.01508259  | -3.074776444 |
| RNA5SP33       | 0.270406166  | 0.24017756  | 2.479385366  | 0.01508301  | -3.074799052 |
| SNORA13        | -0.315686052 | 0.550777592 | -2.479256545 | 0.015088092 | -3.075072089 |
| TRIM61         | 0.346607174  | 0.607790041 | 2.479093879  | 0.015094511 | -3.075416842 |
| AC078785.1     | 0.272108437  | 0.146446053 | 2.478856335  | 0.015103889 | -3.075920258 |
| RNU6-332P      | 0.2587776    | 0.119188555 | 2.478750521  | 0.015108068 | -3.076144492 |
| SMUG1          | -0.285209183 | 2.431828066 | -2.478544493 | 0.015116208 | -3.076581069 |
| RP4-566D2.1    | 0.338888     | 0.196021918 | 2.477597498  | 0.015153674 | -3.078587365 |
| RPS23P7        | 0.21705326   | 0.187399242 | 2.477584072  | 0.015154206 | -3.078615805 |
| RP11-274B21.3  | 0.478330772  | 3.043972041 | 2.476732605  | 0.015187965 | -3.080419147 |
| DMAP1          | -0.250658026 | 2.711977541 | -2.476618456 | 0.015192496 | -3.080660866 |
| VTCN1          | 0.205274779  | 0.200429872 | 2.476534686  | 0.015195822 | -3.080838249 |
| CTD-2639E6.4   | -0.256467378 | 0.606026418 | -2.476466682 | 0.015198522 | -3.080982243 |
| RP11-45P15.2   | 0.213601477  | 0.088708171 | 2.476035369  | 0.015215659 | -3.081895444 |
| ZNF32          | -0.370996777 | 3.67047832  | -2.475438738 | 0.015239393 | -3.083158444 |
| UNC13D         | -0.254156893 | 0.869901664 | -2.475359475 | 0.015242548 | -3.083326214 |
| TSPO           | -0.484805182 | 5.641656738 | -2.474927197 | 0.015259768 | -3.084241108 |
| RP11-108P20.4  | 0.337241356  | 0.137913641 | 2.474723184  | 0.015267901 | -3.084672845 |
| RNU6-752P      | 0.322843444  | 0.13154832  | 2.474618848  | 0.015272062 | -3.08489363  |
| RNU4-21P       | 0.327064736  | 0.411974311 | 2.474587353  | 0.015273318 | -3.084960277 |
| RP11-666A20.4  | 0.312196508  | 0.558721389 | 2.474564437  | 0.015274232 | -3.085008767 |
| RP11-47F1.1    | 0.29540634   | 0.354344325 | 2.473641722  | 0.015311078 | -3.086960944 |
| AC010987.5     | 0.321107857  | 0.153989334 | 2.473569947  | 0.015313948 | -3.08711277  |
| RP11-1348G14.8 | 0.207774963  | 0.823094778 | 2.472656909  | 0.015350492 | -3.089043811 |

|               |              |             |              |             |              |
|---------------|--------------|-------------|--------------|-------------|--------------|
| RP11-96J19.1  | 0.20151525   | 0.200613265 | 2.47256868   | 0.015354027 | -3.089230381 |
| AC012360.1    | 0.274022874  | 0.197839736 | 2.47251345   | 0.015356241 | -3.089347167 |
| RP11-287F9.2  | 0.225329004  | 0.250031561 | 2.472432537  | 0.015359484 | -3.089518257 |
| SESN1         | -0.253693107 | 1.947415401 | -2.472332608 | 0.01536349  | -3.08972955  |
| RP11-138H8.4  | 0.261714229  | 0.124979523 | 2.47177102   | 0.015386024 | -3.09091685  |
| ABCB10        | 0.28653252   | 2.089917313 | 2.471028208  | 0.015415874 | -3.092486937 |
| PILRB         | 0.224324839  | 0.829501163 | 2.470993125  | 0.015417285 | -3.092561083 |
| ATL1          | 0.365527486  | 1.072836654 | 2.470703247  | 0.015428949 | -3.093173684 |
| RP1-63M2.5    | 0.445450455  | 0.308577519 | 2.47037016   | 0.015442361 | -3.093877521 |
| CLEC5A        | -0.412533392 | 0.954083385 | -2.470335249 | 0.015443767 | -3.093951286 |
| RPL4P3        | 0.290039646  | 0.923204062 | 2.470181572  | 0.015449959 | -3.094275985 |
| RP11-884K10.7 | -0.237102966 | 1.415952811 | -2.470077387 | 0.015454158 | -3.094496106 |
| RNU6-927P     | 0.356655021  | 0.21204017  | 2.469905585  | 0.015461085 | -3.094859066 |
| SLC44A1       | 0.312619974  | 3.536324294 | 2.469814347  | 0.015464765 | -3.095051815 |
| RPS26P4       | 0.284847495  | 0.174078021 | 2.469677525  | 0.015470284 | -3.095340851 |
| TMEM173       | -0.318436579 | 3.729284353 | -2.468871276 | 0.015502845 | -3.097043769 |
| SNORD30       | 0.242991854  | 0.201756882 | 2.468780832  | 0.015506501 | -3.09723477  |
| AC068489.1    | 0.270354774  | 0.116821712 | 2.46865931   | 0.015511415 | -3.097491394 |
| ESPL1         | 0.309932463  | 1.797773285 | 2.468398185  | 0.015521979 | -3.098042787 |
| HIGD1AP17     | 0.369630287  | 0.261877317 | 2.467269744  | 0.015567705 | -3.10042503  |
| RPL21P71      | 0.247844388  | 0.213720795 | 2.466910006  | 0.015582307 | -3.101184275 |
| NAP1L5        | -0.433390505 | 2.240262398 | -2.466438512 | 0.015601464 | -3.102179242 |
| RUSC1-AS1     | 0.287308629  | 1.39320687  | 2.466425716  | 0.015601984 | -3.102206242 |
| BRIP1         | 0.299314003  | 1.37208961  | 2.465784376  | 0.015628077 | -3.103559358 |
| NUMA1         | 0.258622209  | 3.424619573 | 2.465719235  | 0.01563073  | -3.103696778 |
| MFAP3         | 0.335752952  | 2.243351378 | 2.465690657  | 0.015631894 | -3.103757063 |
| NUP210P3      | 0.289056195  | 0.241510539 | 2.465507958  | 0.015639335 | -3.104142459 |
| RP11-5A11.1   | 0.262060704  | 0.182627428 | 2.46512987   | 0.015654746 | -3.104939941 |
| AP000719.1    | 0.320575465  | 0.33353608  | 2.465004782  | 0.015659848 | -3.10520376  |
| RNF6P1        | 0.206512697  | 0.087718682 | 2.464778964  | 0.015669061 | -3.105679995 |
| RP13-104F24.3 | -0.436368134 | 2.255243563 | -2.464698414 | 0.015672349 | -3.105849861 |
| RNU6-1097P    | 0.20222014   | 0.066445666 | 2.464285828  | 0.015689198 | -3.106719857 |
| IRS1          | 0.431062604  | 2.82676297  | 2.463889942  | 0.01570538  | -3.107554523 |

|                 |              |             |              |             |              |
|-----------------|--------------|-------------|--------------|-------------|--------------|
| MIR554          | 0.45365248   | 0.273860898 | 2.463467055  | 0.015722683 | -3.108445988 |
| RP11-80115.1    | 0.287250623  | 0.841558385 | 2.463000779  | 0.015741781 | -3.109428766 |
| ZNF835          | 0.298936947  | 0.598121213 | 2.462861646  | 0.015747484 | -3.10972199  |
| CYCSP24         | 0.270426292  | 0.689919922 | 2.46282923   | 0.015748812 | -3.109790305 |
| RP1-191L6.2     | 0.249220889  | 0.115980281 | 2.462429162  | 0.015765222 | -3.110633357 |
| AC005077.7      | 0.226162478  | 0.199030204 | 2.462254519  | 0.01577239  | -3.111001342 |
| MIR190B         | 0.365920435  | 0.132920574 | 2.461956005  | 0.015784648 | -3.111630278 |
| RNU6-1183P      | 0.355014347  | 0.16968944  | 2.461701903  | 0.01579509  | -3.112165591 |
| RNA5SP143       | 0.348698584  | 0.153218151 | 2.461189519  | 0.015816164 | -3.113244881 |
| RP5-930J4.5     | 0.305942382  | 0.152044666 | 2.461185621  | 0.015816324 | -3.113253092 |
| RP3-329A5.1     | 0.271866528  | 0.253986401 | 2.461076271  | 0.015820825 | -3.113483402 |
| DHRS3           | -0.629175912 | 3.402302109 | -2.460849003 | 0.015830183 | -3.113962041 |
| RNU6-317P       | 0.218637998  | 0.094569725 | 2.46039061   | 0.015849072 | -3.114927324 |
| YAP1            | 0.511789142  | 4.114782775 | 2.460024487  | 0.015864174 | -3.115698196 |
| AP001464.4      | 0.277405558  | 0.117160402 | 2.460023939  | 0.015864197 | -3.11569935  |
| AP003064.1      | 0.331753815  | 0.28215099  | 2.45993856   | 0.01586772  | -3.115879099 |
| CTD-2542C24.9   | 0.303832574  | 0.344414956 | 2.459868324  | 0.015870619 | -3.116026966 |
| TMEM199         | -0.250071291 | 1.75008417  | -2.459365776 | 0.015891377 | -3.117084863 |
| CTD-3007L5.1    | 0.331422077  | 0.147049033 | 2.45921902   | 0.015897443 | -3.117393758 |
| RP5-1021I20.6   | 0.2460414    | 0.225655117 | 2.458810162  | 0.015914354 | -3.11825425  |
| CTA-212A2.2     | 0.239194813  | 0.100697721 | 2.45866535   | 0.015920348 | -3.118558995 |
| AC025016.1      | 0.292600833  | 0.260140332 | 2.45823669   | 0.015938102 | -3.119460986 |
| RP4-539M6.18    | 0.258313406  | 0.106201798 | 2.457555973  | 0.015966331 | -3.120893079 |
| RNU7-12P        | 0.536233193  | 0.660146283 | 2.457356543  | 0.01597461  | -3.121312574 |
| RNU6-428P       | 0.339115774  | 0.187571811 | 2.457352904  | 0.015974761 | -3.121320228 |
| RP11-218E20.2   | 0.242481125  | 0.117605092 | 2.457146936  | 0.015983315 | -3.121753446 |
| CCL5            | -0.791144578 | 2.625582564 | -2.456847537 | 0.015995757 | -3.122383124 |
| RP11-510N19.2   | 0.482776098  | 0.33597164  | 2.456687863  | 0.016002396 | -3.122718915 |
| HSP90B3P        | 0.217128525  | 0.979807821 | 2.456574253  | 0.016007122 | -3.122957823 |
| LL22NC03-86D4.1 | 0.275715386  | 0.101431147 | 2.456348662  | 0.016016508 | -3.123432183 |
| ZNF512B         | 0.420567306  | 3.126813129 | 2.456346995  | 0.016016577 | -3.123435687 |
| NME2            | -0.361070322 | 1.581365107 | -2.455956932 | 0.016032819 | -3.124255803 |
| RP11-626P14.1   | 0.242546249  | 0.116133842 | 2.455832825  | 0.01603799  | -3.124516716 |



|                 |              |             |              |             |              |
|-----------------|--------------|-------------|--------------|-------------|--------------|
| MED9            | -0.539687246 | 2.516045225 | -2.455763683 | 0.016040871 | -3.12466207  |
| AP000721.1      | 0.369726489  | 0.28602172  | 2.454513617  | 0.016093045 | -3.127289427 |
| RP11-318I4.2    | 0.215921566  | 0.100252097 | 2.454459704  | 0.016095298 | -3.127402716 |
| RP11-140I24.2   | 0.260816577  | 0.094868863 | 2.453828748  | 0.016121693 | -3.12872838  |
| RP11-382A18.3   | 0.256876207  | 0.125921202 | 2.453537578  | 0.016133887 | -3.129340044 |
| RP11-2C15.1     | 0.252959334  | 0.103583374 | 2.453387585  | 0.016140172 | -3.129655111 |
| AC019198.1      | 0.473966157  | 0.174055857 | 2.453188633  | 0.016148511 | -3.130072993 |
| PEPD            | -0.38975166  | 3.81671206  | -2.4531288   | 0.01615102  | -3.130198661 |
| ARID3B          | 0.320183965  | 1.111357522 | 2.452697009  | 0.016169134 | -3.131105481 |
| EIF1P6          | 0.364999114  | 0.862012915 | 2.452677096  | 0.01616997  | -3.131147297 |
| HIST1H2AG       | 0.422834006  | 1.49863964  | 2.452008498  | 0.016198057 | -3.132551166 |
| WNT16           | 0.621818565  | 0.898223967 | 2.451601758  | 0.016215165 | -3.133405044 |
| CTD-2194L12.2   | 0.248091522  | 0.101825185 | 2.451323547  | 0.016226876 | -3.133989031 |
| UBE2F           | -0.294690759 | 2.471816743 | -2.451117058 | 0.016235573 | -3.134422429 |
| RP11-313F23.4   | 0.356920119  | 0.470845078 | 2.451059172  | 0.016238012 | -3.134543919 |
| RP11-227P3.1    | 0.20837978   | 0.094399947 | 2.450520816  | 0.016260709 | -3.1356737   |
| RNA5SP203       | 0.328497873  | 0.410923171 | 2.45045049   | 0.016263676 | -3.135821269 |
| AMELX           | 0.728789293  | 0.33616525  | 2.450433276  | 0.016264402 | -3.13585739  |
| RP11-297L6.1    | 0.207229383  | 0.07061815  | 2.450144113  | 0.016276608 | -3.136464116 |
| RP11-805F19.2   | 0.23330761   | 0.094562313 | 2.449850158  | 0.016289024 | -3.13708083  |
| TNFSF11         | 0.560102057  | 1.649004434 | 2.449352711  | 0.016310054 | -3.138124326 |
| LAMTOR3         | -0.233211193 | 2.910966558 | -2.449341935 | 0.01631051  | -3.138146929 |
| RP11-644F5.16   | 0.350160619  | 0.142897332 | 2.449156811  | 0.016318342 | -3.138535217 |
| RP11-21M24.3    | 0.213930929  | 0.419977129 | 2.44908772   | 0.016321267 | -3.138680126 |
| CCDC34P1        | 0.23563931   | 0.114484006 | 2.448935258  | 0.016327721 | -3.138999878 |
| PLCG2           | -0.274245987 | 1.047989546 | -2.448537841 | 0.016344556 | -3.13983329  |
| MIR30C1         | 0.2420841    | 0.110519101 | 2.448220577  | 0.016358007 | -3.140498529 |
| XXyac-YX155B6.5 | 0.214554804  | 0.116169503 | 2.448089263  | 0.016363577 | -3.140773847 |
| RP4-560B9.5     | 0.261336963  | 0.113390045 | 2.447865695  | 0.016373064 | -3.141242559 |
| ZNF462          | 0.333694091  | 2.087736649 | 2.447481911  | 0.016389362 | -3.14204708  |
| RNU6-662P       | 0.477334204  | 0.3088885   | 2.447324482  | 0.016396051 | -3.142377065 |
| RRP7A           | -0.320598494 | 3.673256273 | -2.446688785 | 0.016423089 | -3.143709355 |
| CTD-2210P15.2   | 0.229042053  | 0.399006419 | 2.44650369   | 0.016430968 | -3.144097218 |

|                |              |             |              |             |              |
|----------------|--------------|-------------|--------------|-------------|--------------|
| RP11-259P15.4  | 0.27372841   | 0.600508924 | 2.445916241  | 0.016455999 | -3.145328046 |
| RP11-356B19.11 | 0.279018514  | 0.716390553 | 2.445837323  | 0.016459365 | -3.145493377 |
| RP11-536C10.1  | 0.227659812  | 0.364536061 | 2.445828203  | 0.016459754 | -3.145512482 |
| RP11-32P22.1   | 0.246044201  | 0.168397578 | 2.445233907  | 0.016485116 | -3.146757358 |
| OXCT1          | 0.47395432   | 4.220567049 | 2.444499093  | 0.016516524 | -3.14829622  |
| AGBL4-IT1      | 0.237552759  | 0.094968803 | 2.4444291    | 0.016519519 | -3.148442779 |
| MTND4P23       | 0.277975926  | 0.13729709  | 2.444045693  | 0.016535931 | -3.149245539 |
| RC3H1          | 0.259320564  | 2.136378349 | 2.443979636  | 0.01653876  | -3.149383836 |
| RN7SL825P      | 0.276736054  | 0.174868784 | 2.443540984  | 0.016557557 | -3.150302111 |
| AC099759.1     | 0.264986657  | 0.130357293 | 2.443373062  | 0.016564758 | -3.150653603 |
| RP11-257I8.1   | 0.202101446  | 0.162221412 | 2.443112542  | 0.016575935 | -3.151198877 |
| DOT1L          | 0.35607798   | 2.762021705 | 2.443009041  | 0.016580377 | -3.151415492 |
| RP11-561B11.3  | 0.204316453  | 0.148673798 | 2.44300238   | 0.016580663 | -3.151429434 |
| RIC1           | 0.316878738  | 2.09723268  | 2.442382525  | 0.016607291 | -3.152726553 |
| ATM            | 0.298891557  | 1.998691118 | 2.442290087  | 0.016611265 | -3.152919965 |
| C10orf25       | -0.267537827 | 0.888936008 | -2.442265762 | 0.016612311 | -3.152970861 |
| RP11-20I20.2   | 0.244341392  | 0.307218459 | 2.442257648  | 0.01661266  | -3.152987838 |
| RP11-639F1.2   | 0.223170667  | 0.080973433 | 2.44222343   | 0.016614132 | -3.153059433 |
| SLK            | 0.3336594    | 3.074768136 | 2.442160302  | 0.016616847 | -3.153191512 |
| RP4-799D16.1   | 0.242035352  | 0.103089963 | 2.442136052  | 0.01661789  | -3.153242248 |
| DLG5           | 0.349656093  | 2.079546559 | 2.442121782  | 0.016618503 | -3.153272102 |
| RP11-181C21.4  | 0.216357684  | 0.839052796 | 2.442077908  | 0.016620391 | -3.153363895 |
| SPIRE1         | 0.286535612  | 2.158397026 | 2.441855472  | 0.016629962 | -3.153829249 |
| SMC5-AS1       | 0.217422987  | 0.643719266 | 2.44161442   | 0.01664034  | -3.154333509 |
| SNORA7B        | -0.339601881 | 0.694657295 | -2.441514006 | 0.016644665 | -3.154543554 |
| GNA15          | -0.573417009 | 2.277575732 | -2.441341067 | 0.016652116 | -3.154905289 |
| VN1R8P         | 0.221777039  | 0.098685955 | 2.441179178  | 0.016659094 | -3.155243889 |
| METTL11B       | 0.333975889  | 0.637101106 | 2.441162922  | 0.016659794 | -3.155277888 |
| RP1-266L20.4   | 0.246188905  | 0.112638381 | 2.440962825  | 0.016668423 | -3.155696375 |
| RP11-543F8.2   | 0.391423505  | 0.158169579 | 2.440880419  | 0.016671977 | -3.155868712 |
| INPPL1         | 0.274073368  | 4.885847682 | 2.440777448  | 0.01667642  | -3.15608405  |
| MRPL34         | -0.282694466 | 4.05742323  | -2.440623834 | 0.016683049 | -3.156405278 |
| TADA3          | -0.308671649 | 3.761201113 | -2.440567236 | 0.016685492 | -3.156523629 |

|               |              |             |              |             |              |
|---------------|--------------|-------------|--------------|-------------|--------------|
| RP11-68E19.2  | 0.201668409  | 0.12679585  | 2.440499294  | 0.016688426 | -3.156665698 |
| LARP1B        | 0.216562473  | 1.575784083 | 2.440483773  | 0.016689096 | -3.156698153 |
| RP11-334L9.1  | 0.345302546  | 1.173555529 | 2.44039248   | 0.016693038 | -3.156889043 |
| C1orf131      | 0.24061003   | 1.579553152 | 2.440213657  | 0.016700763 | -3.157262936 |
| SLC52A1       | 0.215899934  | 0.232011148 | 2.440142518  | 0.016703836 | -3.157411669 |
| CTD-2521M24.9 | -0.252746347 | 0.864960972 | -2.440092267 | 0.016706008 | -3.15751673  |
| ZBTB7B        | 0.353369928  | 3.349788368 | 2.440080131  | 0.016706532 | -3.157542103 |
| AC144634.1    | 0.239124531  | 0.111466666 | 2.440036362  | 0.016708424 | -3.15763361  |
| CCL3          | -0.446290705 | 1.43470279  | -2.439979574 | 0.016710879 | -3.157752333 |
| LIAS          | -0.253665921 | 2.103719094 | -2.439665757 | 0.01672445  | -3.15840837  |
| GGA1          | -0.245944726 | 2.582692265 | -2.439343824 | 0.016738381 | -3.159081295 |
| ZNF600        | 0.209673367  | 1.006854395 | 2.439293005  | 0.016740582 | -3.159187514 |
| CTD-2282P23.1 | 0.200207449  | 0.227650078 | 2.438790416  | 0.016762355 | -3.160237889 |
| PRKCI         | 0.306244134  | 2.505429812 | 2.438789186  | 0.016762408 | -3.160240459 |
| DEFB123       | 0.2471761    | 0.094081015 | 2.438538402  | 0.016773282 | -3.160764508 |
| ATP8A2P1      | 0.268695342  | 0.11912434  | 2.438486117  | 0.01677555  | -3.160873761 |
| CTD-2128F4.1  | 0.300351239  | 0.097956873 | 2.438431792  | 0.016777907 | -3.160987272 |
| RP11-44N21.3  | 0.218783402  | 0.161249628 | 2.43827949   | 0.016784515 | -3.161305495 |
| RP11-63G10.2  | 0.30323075   | 0.149947863 | 2.437990864  | 0.016797045 | -3.16190851  |
| AC131263.1    | 0.487219939  | 2.63681034  | 2.43789915   | 0.016801029 | -3.162100111 |
| MIR5739       | 0.381525838  | 0.244760767 | 2.43736641   | 0.016824183 | -3.163212945 |
| MIR4322       | 0.277447912  | 0.339637448 | 2.437208852  | 0.016831037 | -3.163542026 |
| DNAJB5-AS1    | 0.340309271  | 0.214691442 | 2.437124019  | 0.016834728 | -3.163719203 |
| RNA5SP329     | 0.21384508   | 0.108957447 | 2.436984153  | 0.016840815 | -3.164011308 |
| RN7SL447P     | 0.221211589  | 0.103187834 | 2.436487591  | 0.016862442 | -3.165048242 |
| RP11-680B3.2  | 0.234497559  | 0.137956045 | 2.436359033  | 0.016868045 | -3.165316672 |
| RNU6-961P     | 0.257869393  | 0.109504562 | 2.436017142  | 0.016882954 | -3.16603048  |
| RP11-392P7.1  | 0.427246723  | 1.510450635 | 2.435845504  | 0.016890444 | -3.166388797 |
| PUS7          | 0.304066945  | 2.699495049 | 2.435837216  | 0.016890805 | -3.1664061   |
| GRTP1-AS1     | 0.318401252  | 0.375178025 | 2.435681499  | 0.016897603 | -3.166731158 |
| ZNF367        | 0.40331363   | 2.317275428 | 2.435638349  | 0.016899487 | -3.166821232 |
| AL135745.1    | 0.251695708  | 0.388940356 | 2.435595165  | 0.016901372 | -3.166911375 |
| RP11-219H23.1 | 0.22663929   | 0.08898012  | 2.434882867  | 0.016932503 | -3.168398027 |

|               |              |             |              |             |              |
|---------------|--------------|-------------|--------------|-------------|--------------|
| ANKRD42       | 0.218117761  | 1.244129022 | 2.434735903  | 0.016938932 | -3.168704714 |
| LOXL4         | 0.722023628  | 2.475893056 | 2.434686005  | 0.016941115 | -3.168808837 |
| ARHGEF12      | 0.315471246  | 2.864793609 | 2.434449864  | 0.016951452 | -3.169301575 |
| PSMD8P1       | 0.202362758  | 0.514622528 | 2.434431805  | 0.016952242 | -3.169339255 |
| FAN1          | 0.259177895  | 1.618125501 | 2.433549841  | 0.016990899 | -3.171179212 |
| LENG8-AS1     | 0.306485752  | 1.40367075  | 2.433030323  | 0.017013706 | -3.172262762 |
| RP11-520P18.1 | 0.40583941   | 0.26563132  | 2.432828318  | 0.017022582 | -3.172684028 |
| KLHL34        | 0.201470906  | 0.206311811 | 2.432825186  | 0.017022719 | -3.172690559 |
| RP11-16L9.2   | 0.367477541  | 0.590613877 | 2.432429395  | 0.017040121 | -3.173515861 |
| NOP10         | -0.414543866 | 6.145046039 | -2.432375139 | 0.017042508 | -3.173628987 |
| RN7SKP181     | 0.241824489  | 0.115432574 | 2.431966012  | 0.017060516 | -3.174481959 |
| ST6GAL1       | -0.335752758 | 1.383998508 | -2.431601338 | 0.017076581 | -3.175242149 |
| RPL30P5       | 0.224559036  | 0.196549773 | 2.431293862  | 0.017090137 | -3.175883029 |
| SCAF4         | 0.315216571  | 3.288452335 | 2.431028135  | 0.01710186  | -3.176436833 |
| MIS18BP1      | 0.337272288  | 2.457696707 | 2.430828578  | 0.017110668 | -3.176852699 |
| RP11-68I18.2  | 0.34110724   | 0.490663158 | 2.430508139  | 0.017124821 | -3.177520414 |
| EIF1B         | -0.286657778 | 3.852286568 | -2.430347964 | 0.017131899 | -3.17785415  |
| MTND2P9       | 0.294890559  | 0.49663176  | 2.429675598  | 0.01716164  | -3.179254868 |
| CD247         | -0.247341016 | 0.415302903 | -2.429122901 | 0.017186123 | -3.180406032 |
| RNU4-74P      | 0.20990752   | 0.064767129 | 2.428772952  | 0.01720164  | -3.181134795 |
| AC098477.1    | 0.314334422  | 0.217406979 | 2.42876948   | 0.017201794 | -3.181142024 |
| AE000658.30   | 0.250229158  | 0.123283376 | 2.428721656  | 0.017203916 | -3.181241609 |
| AC108488.4    | -0.309971263 | 1.439811163 | -2.428564511 | 0.017210889 | -3.181568824 |
| LINC01150     | -0.354763894 | 0.901877878 | -2.428496978 | 0.017213886 | -3.18170944  |
| RNU5E-8P      | 0.230833294  | 0.102101677 | 2.428397932  | 0.017218283 | -3.181915666 |
| RP11-88E10.4  | 0.263568557  | 0.429683764 | 2.428354593  | 0.017220207 | -3.182005899 |
| TEX264        | -0.270539681 | 2.943472875 | -2.42835166  | 0.017220338 | -3.182012006 |
| PHF5A         | -0.36816541  | 4.488754307 | -2.427950857 | 0.017238143 | -3.182846434 |
| AP000705.7    | 0.229666412  | 0.207313865 | 2.42748007   | 0.017259078 | -3.183826412 |
| RP11-1072A3.4 | -0.27559371  | 0.764242101 | -2.427000345 | 0.017280433 | -3.184824824 |
| RP13-225O21.5 | 0.208140563  | 0.161994968 | 2.426967997  | 0.017281874 | -3.18489214  |
| CXorf57       | -0.450829578 | 0.913780345 | -2.426956347 | 0.017282393 | -3.184916383 |
| MDM1          | 0.243537903  | 1.161575923 | 2.426722391  | 0.017292818 | -3.185403229 |

|               |              |             |              |             |              |
|---------------|--------------|-------------|--------------|-------------|--------------|
| NIFKP3        | 0.226908199  | 0.17300836  | 2.426468226  | 0.017304149 | -3.185932081 |
| RN7SL39P      | 0.21057521   | 0.082695118 | 2.426040671  | 0.017323226 | -3.186821606 |
| AC234582.1    | 0.31357093   | 0.343188764 | 2.425745369  | 0.017336412 | -3.187435899 |
| RP11-355B11.1 | 0.200702384  | 0.071422492 | 2.425695809  | 0.017338626 | -3.187538988 |
| PPP1R8P1      | 0.227215549  | 0.202540114 | 2.425340588  | 0.017354502 | -3.18827783  |
| SPATA20       | -0.382866207 | 3.15722653  | -2.425133937 | 0.017363744 | -3.18870761  |
| RP11-521C10.1 | 0.238055796  | 0.087196954 | 2.424935292  | 0.017372632 | -3.18912071  |
| RP11-644F5.17 | 0.305274497  | 0.146164122 | 2.424386305  | 0.017397216 | -3.190262226 |
| RN7SL146P     | 0.29149218   | 0.440466843 | 2.424268997  | 0.017402474 | -3.190506116 |
| AC092071.1    | 0.230799273  | 0.130946695 | 2.424267528  | 0.017402539 | -3.19050917  |
| RP1-134O19.3  | 0.240157247  | 0.243408018 | 2.424265352  | 0.017402637 | -3.190513694 |
| RP11-402G3.6  | 0.2933731    | 0.119125932 | 2.424015854  | 0.017413823 | -3.191032382 |
| TNFSF10       | -0.641033513 | 2.204482776 | -2.423959784 | 0.017416338 | -3.191148942 |
| SF3B5         | -0.363307051 | 6.250487516 | -2.423937003 | 0.01741736  | -3.191196298 |
| RNU4-84P      | 0.269457195  | 0.170442688 | 2.423683447  | 0.017428737 | -3.191723363 |
| VTI1B         | -0.234429375 | 3.576715121 | -2.423026266 | 0.017458254 | -3.193089213 |
| NPM1P28       | 0.206852236  | 0.089747061 | 2.422932034  | 0.017462491 | -3.193285034 |
| RP11-79J24.1  | 0.597840218  | 0.204903554 | 2.422395533  | 0.017486626 | -3.194399795 |
| CTC-444N24.7  | 0.402164085  | 1.687383873 | 2.422241563  | 0.017493558 | -3.194719681 |
| COX6C         | -0.382865067 | 4.711532063 | -2.421849791 | 0.017511208 | -3.195533539 |
| GRIP1         | 0.240602385  | 0.270213366 | 2.421632308  | 0.017521013 | -3.195985285 |
| PDK1          | 0.389108264  | 1.407219521 | 2.4216051    | 0.01752224  | -3.196041799 |
| ADRA1B        | -0.324123095 | 0.780004468 | -2.421480288 | 0.017527869 | -3.196301033 |
| RP11-111A22.1 | 0.245764364  | 0.278916235 | 2.42145231   | 0.017529131 | -3.196359142 |
| GBAP1         | 0.263925692  | 1.117493745 | 2.421206332  | 0.017540231 | -3.196870002 |
| TEF           | -0.38341991  | 2.126222584 | -2.421060914 | 0.017546796 | -3.197171993 |
| AL157788.1    | 0.247653649  | 0.104593093 | 2.420963397  | 0.0175512   | -3.197374498 |
| DYRK1A        | 0.294189547  | 3.12233876  | 2.420760833  | 0.01756035  | -3.197795124 |
| SRXN1         | 0.358630654  | 1.012096413 | 2.420744219  | 0.017561101 | -3.19782962  |
| RC3H2         | 0.256635459  | 2.61229847  | 2.420164435  | 0.017587317 | -3.19903337  |
| RP11-380G5.2  | 0.330108062  | 0.359056132 | 2.419764971  | 0.017605399 | -3.199862594 |
| RP11-567C20.2 | 0.216596222  | 0.071259911 | 2.419744517  | 0.017606325 | -3.19990505  |
| NECAB3        | 0.367693468  | 2.583635385 | 2.419513966  | 0.01761677  | -3.20038358  |

|               |              |             |              |             |              |
|---------------|--------------|-------------|--------------|-------------|--------------|
| RP11-486A14.1 | 0.20710162   | 0.169109096 | 2.41948603   | 0.017618036 | -3.200441561 |
| RP11-416K24.1 | 0.214304147  | 0.103491711 | 2.418755291  | 0.017651178 | -3.201958002 |
| ACAA1         | -0.245414268 | 2.10568296  | -2.4187122   | 0.017653134 | -3.202047413 |
| MIR606        | 0.380804724  | 0.238469869 | 2.418686346  | 0.017654308 | -3.202101059 |
| RNY3P8        | 0.43100362   | 0.661551133 | 2.418579843  | 0.017659143 | -3.202322036 |
| HMGCL         | -0.264617183 | 2.670479512 | -2.418282546 | 0.017672649 | -3.202938841 |
| RPS29P24      | 0.311303764  | 0.130840736 | 2.418195908  | 0.017676586 | -3.203118576 |
| RP11-158D2.1  | 0.25364088   | 0.228964725 | 2.417888166  | 0.017690578 | -3.203756962 |
| PKIG          | 0.325206538  | 4.460964672 | 2.417846827  | 0.017692458 | -3.203842712 |
| RP5-1096D14.6 | 0.233638655  | 0.114617928 | 2.417549514  | 0.017705987 | -3.204459388 |
| CD5           | -0.239635287 | 0.422434857 | -2.417512608 | 0.017707667 | -3.204535933 |
| MIR320D2      | 0.252053695  | 0.089925941 | 2.417393833  | 0.017713074 | -3.20478227  |
| TBC1D24       | 0.223349291  | 1.965152025 | 2.417266659  | 0.017718866 | -3.205046015 |
| SLC6A3        | 0.269990559  | 0.157459668 | 2.417213897  | 0.017721269 | -3.205155435 |
| MIR3163       | 0.248820741  | 0.201303164 | 2.417000161  | 0.017731008 | -3.205598664 |
| KCNQ1         | -0.312719589 | 1.659185081 | -2.41683745  | 0.017738425 | -3.205936059 |
| RP11-490K7.1  | 0.273826713  | 0.218284872 | 2.416722028  | 0.017743688 | -3.206175385 |
| ST13P19       | 0.210579483  | 0.479091378 | 2.416537269  | 0.017752116 | -3.20655846  |
| RNU6-788P     | 0.221894875  | 0.085099794 | 2.416426835  | 0.017757155 | -3.206787419 |
| SNORA11C      | 0.242244412  | 0.131154415 | 2.416361164  | 0.017760152 | -3.206923567 |
| RP11-47A8.5   | 0.584123909  | 3.196040035 | 2.415792685  | 0.017786115 | -3.208102005 |
| CRAMP1L       | 0.202055744  | 1.549975336 | 2.415645721  | 0.017792833 | -3.208406616 |
| MLLT4         | 0.376768471  | 2.586977385 | 2.415372552  | 0.017805325 | -3.208972772 |
| RP11-228B15.4 | 0.317093144  | 1.146787865 | 2.414478896  | 0.017846248 | -3.210824527 |
| RP11-680F8.3  | 0.297492085  | 0.996436195 | 2.414242971  | 0.017857066 | -3.211313291 |
| MIR130B       | 0.253423481  | 0.286325385 | 2.414235238  | 0.01785742  | -3.211329311 |
| LRRC37A7P     | 0.430169603  | 0.739459234 | 2.414200603  | 0.017859009 | -3.211401059 |
| TMEM88        | -0.449090442 | 1.493933544 | -2.413749361 | 0.017879718 | -3.212335766 |
| RP11-24M17.3  | 0.31008522   | 0.36279486  | 2.413509597  | 0.01789073  | -3.212832354 |
| RP5-968D22.1  | 0.202283754  | 0.114181958 | 2.413235417  | 0.01790333  | -3.213400172 |
| RP11-449J3.3  | 0.211241977  | 0.070337518 | 2.413003994  | 0.017913971 | -3.213879396 |
| KLF4          | 0.551305864  | 3.312887124 | 2.412810234  | 0.017922885 | -3.214280598 |
| SRGAP1        | 0.257771064  | 1.162129369 | 2.41280785   | 0.017922995 | -3.214285536 |

|               |              |             |              |             |              |
|---------------|--------------|-------------|--------------|-------------|--------------|
| AC011998.4    | 0.238374323  | 0.192158056 | 2.4123452    | 0.017944295 | -3.215243392 |
| PPP4C         | -0.299858072 | 4.90566203  | -2.412221325 | 0.017950002 | -3.215499834 |
| RP11-275I14.4 | 0.21807518   | 0.640657977 | 2.411995245  | 0.017960421 | -3.215967824 |
| GPR84         | -0.314986622 | 0.824888068 | -2.411508572 | 0.01798287  | -3.216975121 |
| DRAM1         | -0.325376819 | 1.970943102 | -2.411391766 | 0.017988261 | -3.217216856 |
| RGS18         | -0.230474213 | 0.611596126 | -2.411104471 | 0.018001528 | -3.217811381 |
| CKAP4         | 0.367596132  | 6.738592593 | 2.410719139  | 0.018019337 | -3.218608687 |
| C8orf89       | 0.454098411  | 0.305981275 | 2.410640478  | 0.018022974 | -3.218771433 |
| PNPLA8        | 0.278369082  | 2.728822365 | 2.409969155  | 0.018054042 | -3.220160194 |
| CDK19         | 0.297917968  | 2.307759843 | 2.409911327  | 0.018056721 | -3.220279807 |
| RP5-1155K23.4 | 0.25232587   | 0.118563319 | 2.409472119  | 0.018077075 | -3.221188192 |
| SH2D2A        | 0.394222785  | 1.238228391 | 2.408937555  | 0.018101877 | -3.222293603 |
| EXOC4         | 0.229437926  | 2.86668208  | 2.408346774  | 0.018129322 | -3.223515018 |
| RFXAP         | 0.253465784  | 1.723715415 | 2.407974951  | 0.018146614 | -3.224283613 |
| RFTN1         | -0.393202471 | 3.121393337 | -2.407796465 | 0.01815492  | -3.224652525 |
| AL139383.1    | 0.216837951  | 0.114885431 | 2.407296678  | 0.018178196 | -3.225685409 |
| MIR4280       | 0.282926129  | 0.107414769 | 2.407203424  | 0.018182541 | -3.225878111 |
| RP3-523E19.2  | 0.297255487  | 0.813490014 | 2.406981879  | 0.01819287  | -3.22633589  |
| RP11-259F16.3 | 0.204399062  | 0.180194351 | 2.40672274   | 0.018204958 | -3.226871307 |
| RN7SL499P     | 0.285903712  | 0.260847387 | 2.406264276  | 0.01822636  | -3.22781843  |
| RPL23AP62     | 0.20444109   | 0.12015906  | 2.406003286  | 0.018238554 | -3.228357532 |
| GIP           | 0.258002519  | 0.171501613 | 2.405913301  | 0.01824276  | -3.228543392 |
| RN7SKP177     | 0.248936547  | 0.109905308 | 2.405706801  | 0.018252416 | -3.228969888 |
| RN7SL834P     | 0.366174854  | 0.436002024 | 2.405185056  | 0.018276831 | -3.230047338 |
| HOXD10        | 0.442463581  | 1.136582388 | 2.405146373  | 0.018278642 | -3.230127214 |
| RP11-146N23.1 | 0.552194228  | 1.504255319 | 2.404815754  | 0.01829413  | -3.230809857 |
| CCDC144NL     | 0.242972698  | 0.276365015 | 2.404598209  | 0.018304328 | -3.231258987 |
| RNA5SP28      | 0.281877223  | 0.201215338 | 2.40427408   | 0.01831953  | -3.2319281   |
| SNORD81       | 0.487706129  | 0.312036402 | 2.403724431  | 0.018345336 | -3.233062583 |
| RP11-665J16.1 | 0.203324056  | 0.096051886 | 2.403624558  | 0.018350029 | -3.233268699 |
| SNORD8        | 0.381886994  | 0.54620991  | 2.403139355  | 0.018372841 | -3.234269943 |
| STAG3L4       | 0.29128164   | 1.662076877 | 2.402676857  | 0.01839461  | -3.23522417  |
| MIR320C1      | 0.258940703  | 0.418808775 | 2.402545552  | 0.018400794 | -3.235495051 |

|               |              |             |              |             |              |
|---------------|--------------|-------------|--------------|-------------|--------------|
| KAT6B         | 0.314549099  | 1.597355711 | 2.402415203  | 0.018406935 | -3.235763946 |
| AIFM1         | -0.313185563 | 3.483017114 | -2.40233854  | 0.018410548 | -3.235922088 |
| RP11-25L19.1  | 0.310652569  | 0.11607123  | 2.402335552  | 0.018410689 | -3.235928251 |
| UQCR10        | -0.399641432 | 5.949230621 | -2.402134464 | 0.018420168 | -3.236343037 |
| CT867977.1    | 0.321352384  | 0.175639587 | 2.401479291  | 0.018451083 | -3.237694258 |
| RNU7-52P      | 0.290369094  | 0.270007241 | 2.401415268  | 0.018454106 | -3.237826282 |
| EIF6          | -0.351074521 | 5.753974574 | -2.401162419 | 0.018466051 | -3.238347657 |
| RP11-843F11.1 | 0.234781087  | 0.097537819 | 2.401040303  | 0.018471822 | -3.238599443 |
| TAPBPL        | -0.416248509 | 2.309576812 | -2.399987032 | 0.018521668 | -3.240770686 |
| SPG20         | 0.288084742  | 3.02384649  | 2.399898859  | 0.018525846 | -3.240952411 |
| AC093724.2    | 0.29948314   | 1.979492654 | 2.399882165  | 0.018526637 | -3.240986818 |
| RN7SL104P     | 0.23178759   | 0.096261537 | 2.399806631  | 0.018530218 | -3.241142487 |
| ZDHHC18       | 0.213692048  | 3.045396601 | 2.399424125  | 0.018548357 | -3.241930742 |
| RNU6-633P     | 0.301079392  | 0.279072362 | 2.3994193    | 0.018548585 | -3.241940685 |
| DECR1         | -0.314765965 | 3.775362273 | -2.39924649  | 0.018556786 | -3.242296768 |
| PDCD4-AS1     | -0.371139408 | 2.177763474 | -2.399229508 | 0.018557592 | -3.24233176  |
| AL133243.3    | 0.303661     | 0.287916662 | 2.399020062  | 0.018567535 | -3.242763301 |
| SLC25A36      | 0.323009014  | 2.764873522 | 2.398688187  | 0.0185833   | -3.24344703  |
| RP11-77M5.1   | 0.256113857  | 0.245798695 | 2.39868717   | 0.018583349 | -3.243449123 |
| RP11-196D18.5 | 0.20921383   | 0.090918542 | 2.398617784  | 0.018586646 | -3.243592062 |
| DYNLL1        | -0.252979382 | 6.036200335 | -2.398608383 | 0.018587093 | -3.243611428 |
| AC144530.1    | 0.506406828  | 2.322279523 | 2.398526475  | 0.018590987 | -3.243780158 |
| RP11-317N8.4  | 0.20175844   | 0.450169429 | 2.398411401  | 0.018596458 | -3.244017201 |
| SMG7          | 0.284066193  | 3.348871911 | 2.39841003   | 0.018596523 | -3.244020025 |
| HAVCR2        | -0.469022392 | 2.331038094 | -2.398195744 | 0.018606715 | -3.244461407 |
| AP001604.1    | 0.464563825  | 0.268035451 | 2.397433916  | 0.018642991 | -3.246030336 |
| POPDC2        | -0.275426154 | 1.316763839 | -2.397279064 | 0.018650372 | -3.246349188 |
| SMARCC1       | 0.294913871  | 3.943461405 | 2.397204775  | 0.018653914 | -3.24650215  |
| LINC01078     | 0.251863172  | 0.088999978 | 2.397144436  | 0.018656791 | -3.246626384 |
| RN7SL619P     | 0.205651323  | 0.238033067 | 2.396638459  | 0.018680935 | -3.247668058 |
| RNU6-402P     | 0.311579698  | 0.173023916 | 2.396050987  | 0.018709002 | -3.248877272 |
| MIR508        | 0.272449672  | 0.085127424 | 2.396026544  | 0.01871017  | -3.248927579 |
| TDG           | 0.267497668  | 2.825292739 | 2.395573805  | 0.018731827 | -3.249859283 |



|                   |              |             |              |             |              |
|-------------------|--------------|-------------|--------------|-------------|--------------|
| CARD8-AS1         | -0.239107437 | 1.466386606 | -2.394991074 | 0.018759735 | -3.251058277 |
| FTLP8             | 0.233619637  | 0.21341105  | 2.393754589  | 0.018819074 | -3.253601564 |
| PLA2G7            | -0.38948843  | 1.841136083 | -2.393599211 | 0.018826543 | -3.253921075 |
| MIR7-2            | 0.222010914  | 0.121682407 | 2.392934679  | 0.018858514 | -3.255287385 |
| SLC16A7           | 0.316266678  | 1.262368734 | 2.392829575  | 0.018863575 | -3.255503453 |
| ATPAF1            | 0.237061203  | 3.319095574 | 2.392822051  | 0.018863938 | -3.255518919 |
| RP11-785G17.1     | 0.230490457  | 0.107317065 | 2.392788965  | 0.018865531 | -3.255586934 |
| AC078927.1        | 0.319055121  | 0.10944159  | 2.392653299  | 0.018872066 | -3.255865816 |
| RP11-565F19.3     | 0.275027193  | 0.208113608 | 2.392640175  | 0.018872699 | -3.255892794 |
| RNU6-1236P        | 0.27315091   | 0.104596459 | 2.39221593   | 0.018893148 | -3.256764795 |
| HLA-DQB1-AS1      | -0.310949493 | 0.575817055 | -2.391398937 | 0.018932585 | -3.258443685 |
| RP11-295D4.4      | 0.293306421  | 0.371853456 | 2.391279501  | 0.018938357 | -3.258689079 |
| LL0XNC01-220B11.1 | 0.265971014  | 0.128760605 | 2.39122861   | 0.018940816 | -3.258793637 |
| RAB23             | 0.418451517  | 2.503501389 | 2.391197642  | 0.018942313 | -3.258857261 |
| RP11-465N4.4      | 0.205138387  | 0.377305175 | 2.391017513  | 0.018951022 | -3.259227325 |
| CD200R1           | -0.200505373 | 0.469972503 | -2.390800467 | 0.018961521 | -3.259673201 |
| PSME2             | -0.416585364 | 4.710455204 | -2.390688414 | 0.018966943 | -3.259903379 |
| MIR6070           | 0.335766526  | 0.215068573 | 2.390387192  | 0.018981525 | -3.260522093 |
| RP4-601P9.1       | 0.255844585  | 0.111044583 | 2.390023916  | 0.018999124 | -3.261268179 |
| ASPH              | 0.357128594  | 3.562074694 | 2.389717507  | 0.01901398  | -3.261897397 |
| AHCYL1            | -0.260253576 | 5.297028621 | -2.389267655 | 0.019035809 | -3.26282105  |
| VTRNA2-2P         | 0.399973251  | 0.211629413 | 2.389034856  | 0.019047115 | -3.263298984 |
| ARID4B            | 0.264939324  | 1.959262556 | 2.38887538   | 0.019054863 | -3.263626361 |
| LGALS3            | -0.422081825 | 5.405840345 | -2.388802495 | 0.019058405 | -3.263775977 |
| RNU6-178P         | 0.339460699  | 0.295633225 | 2.38869634   | 0.019063565 | -3.26399388  |
| MFSD5             | -0.24727698  | 3.722972325 | -2.388541311 | 0.019071102 | -3.264312091 |
| AC097463.1        | 0.273936528  | 0.112779817 | 2.38820635   | 0.019087398 | -3.264999569 |
| MKI67             | 0.411351982  | 3.582384194 | 2.388068472  | 0.019094109 | -3.265282525 |
| RP11-267J23.1     | 0.230878196  | 0.326840303 | 2.3880146    | 0.019096732 | -3.265393079 |
| BCAS2P3           | 0.243525545  | 0.109211714 | 2.387843447  | 0.019105066 | -3.265744298 |
| RP11-526D8.11     | 0.307499615  | 1.507652068 | 2.387765286  | 0.019108874 | -3.265904684 |
| AC073508.1        | 0.276829023  | 0.164150381 | 2.387757932  | 0.019109232 | -3.265919774 |
| NCKAP1L           | -0.443024206 | 1.91588844  | -2.387378919 | 0.019127704 | -3.266697437 |

|               |              |             |              |             |              |
|---------------|--------------|-------------|--------------|-------------|--------------|
| RNU6-111P     | 0.300854785  | 0.115014018 | 2.387157637  | 0.019138496 | -3.267151415 |
| AC007568.1    | 0.213465184  | 0.109769433 | 2.3869634    | 0.019147974 | -3.267549879 |
| RP5-859M6.1   | 0.252193975  | 0.14390673  | 2.38686529   | 0.019152762 | -3.267751134 |
| RN7SL380P     | 0.216320544  | 0.081824393 | 2.386191182  | 0.019185694 | -3.269133754 |
| ATP5J2P3      | 0.219990025  | 0.134877498 | 2.386168059  | 0.019186825 | -3.269181173 |
| EMC3          | -0.273903902 | 3.478405088 | -2.385775219 | 0.01920604  | -3.269986739 |
| CABLES2       | 0.345155143  | 2.285984993 | 2.385763516  | 0.019206613 | -3.270010736 |
| AC003664.1    | 0.371155245  | 0.239864413 | 2.385456456  | 0.019221645 | -3.270640317 |
| RP11-780O17.1 | 0.2238603    | 0.075066036 | 2.385158161  | 0.019236257 | -3.27125186  |
| HSDL1         | -0.320131814 | 2.59183014  | -2.385096318 | 0.019239288 | -3.271378637 |
| TSPAN4        | -0.34652352  | 3.293731207 | -2.385080666 | 0.019240055 | -3.271410721 |
| RP11-73E6.2   | 0.237896368  | 0.145118679 | 2.385031396  | 0.01924247  | -3.271511724 |
| SRGNP1        | 0.209400805  | 0.06574537  | 2.385022029  | 0.019242929 | -3.271530925 |
| RP11-517B11.6 | 0.224228558  | 0.11150247  | 2.384975402  | 0.019245215 | -3.271626504 |
| MIR181A2      | 0.229741379  | 0.179567728 | 2.384916509  | 0.019248103 | -3.271747227 |
| RNU6-1139P    | 0.215574506  | 0.09285094  | 2.384268272  | 0.01927991  | -3.273075849 |
| EFNB3         | -0.686086114 | 1.493399105 | -2.384119471 | 0.019287217 | -3.273380787 |
| COX4I1        | -0.410838429 | 5.389478443 | -2.383953922 | 0.019295351 | -3.273720026 |
| CTD-2313J17.5 | 0.219985585  | 0.392892641 | 2.383602172  | 0.019312642 | -3.274440758 |
| B3GALTL       | 0.307145627  | 2.365880985 | 2.383584395  | 0.019313516 | -3.274477181 |
| PTMS          | -0.354166986 | 7.927148131 | -2.383512044 | 0.019317075 | -3.274625414 |
| AC003989.4    | 0.298063047  | 0.185577195 | 2.383390821  | 0.019323038 | -3.274873769 |
| MDM2          | 0.365230781  | 2.426419393 | 2.382500255  | 0.019366899 | -3.276697977 |
| IFI30         | -0.321270354 | 1.04740667  | -2.382422593 | 0.019370728 | -3.276857029 |
| RP11-200A13.1 | 0.336678808  | 0.18281081  | 2.382257011  | 0.019378894 | -3.277196127 |
| RPS27P29      | 0.324295926  | 0.984643834 | 2.382244296  | 0.019379521 | -3.277222165 |
| RP11-473M20.9 | -0.210571159 | 0.597943727 | -2.382199711 | 0.019381721 | -3.277313468 |
| CTD-3065B20.2 | 0.223662601  | 0.488318175 | 2.38208642   | 0.01938731  | -3.277545463 |
| RN7SL89P      | 0.361954616  | 0.210545593 | 2.382069322  | 0.019388154 | -3.277580473 |
| CTB-167G5.3   | 0.234384178  | 0.431875338 | 2.382050379  | 0.019389089 | -3.277619263 |
| PKD1P5        | 0.253943182  | 0.457298804 | 2.382029735  | 0.019390108 | -3.277661536 |
| AC118463.1    | 0.274673905  | 0.179551916 | 2.381921927  | 0.019395429 | -3.27788229  |
| PPME1         | 0.236473576  | 2.917935975 | 2.381879653  | 0.019397516 | -3.277968848 |

|                |              |             |              |             |              |
|----------------|--------------|-------------|--------------|-------------|--------------|
| AC073330.1     | 0.452855688  | 0.238635414 | 2.381721509  | 0.019405325 | -3.27829265  |
| FAM177A1P1     | 0.206762529  | 0.160118162 | 2.381638615  | 0.019409419 | -3.278462371 |
| RP11-204C16.4  | 0.254235143  | 1.153949707 | 2.381192101  | 0.019431486 | -3.279376486 |
| CDK5           | -0.328173734 | 3.021015169 | -2.381130906 | 0.019434512 | -3.279501755 |
| TAF5L          | 0.200685605  | 2.094740009 | 2.381120735  | 0.019435015 | -3.279522575 |
| RNU6-1323P     | 0.211970513  | 0.111592744 | 2.380167267  | 0.019482219 | -3.281473994 |
| RNU1-138P      | 0.365732386  | 0.294181275 | 2.379947562  | 0.019493111 | -3.281923557 |
| RP11-350G8.4   | 0.344704225  | 0.158927793 | 2.379732012  | 0.019503801 | -3.282364585 |
| TRAPPC1        | -0.654341543 | 5.954141324 | -2.379430912 | 0.019518744 | -3.282980593 |
| U4atac         | 0.231749104  | 0.155019733 | 2.378690461  | 0.019555533 | -3.284495168 |
| HCK            | -0.476438079 | 2.458258983 | -2.37858318  | 0.019560868 | -3.284714574 |
| ARMC7          | -0.298805986 | 2.694571568 | -2.378539932 | 0.01956302  | -3.284803021 |
| RP11-53L24.1   | 0.32324091   | 0.28028672  | 2.378110634  | 0.019584385 | -3.285680903 |
| ZC3H4          | 0.249615611  | 3.136135575 | 2.377240977  | 0.019627729 | -3.287458868 |
| CTD-2291D10.3  | 0.25906952   | 0.140458452 | 2.377192609  | 0.019630142 | -3.287557736 |
| RP5-887A10.1   | 0.26516276   | 0.125210762 | 2.377127451  | 0.019633394 | -3.287690923 |
| MZT1           | 0.396658513  | 3.268317374 | 2.376886421  | 0.019645425 | -3.288183574 |
| PCDH9-AS2      | 0.212770003  | 0.132032437 | 2.376794243  | 0.019650028 | -3.288371969 |
| RP11-486F17.1  | 0.225174679  | 0.272529699 | 2.376563557  | 0.019661551 | -3.288843422 |
| TUBGCP3        | 0.392259613  | 2.316698678 | 2.376404273  | 0.019669511 | -3.289168929 |
| C11orf54       | 0.290530243  | 2.008372618 | 2.375803185  | 0.019699577 | -3.290397114 |
| GLDC           | 0.281207732  | 0.528878046 | 2.375773141  | 0.01970108  | -3.290458495 |
| RNU7-188P      | 0.226081714  | 0.120863065 | 2.375519766  | 0.019713767 | -3.290976121 |
| R3HDM4         | -0.264464931 | 4.417924554 | -2.375242571 | 0.019727654 | -3.291542356 |
| RNU6-716P      | 0.340262005  | 0.123651203 | 2.375222594  | 0.019728655 | -3.291583163 |
| SECISBP2       | 0.226508812  | 1.887201507 | 2.374726904  | 0.019753512 | -3.292595573 |
| CLEC18A        | 0.219239119  | 0.243109724 | 2.374639589  | 0.019757893 | -3.292773888 |
| RNU6-940P      | 0.34267067   | 0.118897617 | 2.374572988  | 0.019761236 | -3.292909898 |
| AC083884.8     | 0.203823425  | 0.387575532 | 2.37453483   | 0.019763151 | -3.292987822 |
| TTC13          | 0.28467548   | 2.085905895 | 2.374311068  | 0.019774386 | -3.293444747 |
| RP11-274B21.13 | 0.396081239  | 1.959956457 | 2.374215547  | 0.019779183 | -3.293639792 |
| AKAP9          | 0.328788757  | 1.954553397 | 2.373988268  | 0.019790603 | -3.294103846 |
| AC011897.2     | 0.219089721  | 0.095827062 | 2.373960117  | 0.019792018 | -3.29416132  |

|               |              |             |              |             |              |
|---------------|--------------|-------------|--------------|-------------|--------------|
| AC002115.5    | 0.327671917  | 0.182256721 | 2.373835533  | 0.01979828  | -3.294415673 |
| AC006534.1    | 0.260897438  | 0.100493387 | 2.373715224  | 0.019804329 | -3.29466129  |
| TSPAN9        | -0.384422724 | 3.806780258 | -2.373711319 | 0.019804526 | -3.294669261 |
| MAPKAPK3      | -0.327783065 | 3.4418886   | -2.373680253 | 0.019806088 | -3.294732682 |
| KALRN         | 0.244622508  | 0.988062258 | 2.37366793   | 0.019806708 | -3.294757839 |
| DNAJC16       | 0.235351155  | 2.252467464 | 2.373441474  | 0.0198181   | -3.295220119 |
| RP13-20L14.4  | 0.243201248  | 0.268899296 | 2.373432365  | 0.019818558 | -3.295238713 |
| AC114755.5    | 0.247322068  | 0.192730077 | 2.373151982  | 0.019832672 | -3.295811024 |
| AC012485.2    | 0.236316046  | 0.099238658 | 2.373034348  | 0.019838596 | -3.296051117 |
| RP5-1073F15.1 | 0.270224069  | 0.23353217  | 2.372941363  | 0.019843279 | -3.296240895 |
| AP000436.4    | 0.219243014  | 0.167612222 | 2.372713389  | 0.019854767 | -3.296706151 |
| HECTD2        | 0.234747115  | 1.269731232 | 2.372708104  | 0.019855033 | -3.296716935 |
| RNU6-839P     | 0.201218767  | 0.07680878  | 2.372214883  | 0.019879906 | -3.29772338  |
| LILRB4        | -0.506454624 | 1.672733137 | -2.371932393 | 0.019894165 | -3.298299733 |
| LINC00337     | 0.263226237  | 0.444124033 | 2.371184271  | 0.01993197  | -3.299825813 |
| EXOSC7        | -0.289588975 | 2.423174889 | -2.370913154 | 0.019945686 | -3.300378757 |
| RP5-1142J19.2 | 0.280526765  | 0.607828219 | 2.370765265  | 0.019953172 | -3.300680354 |
| MAGI2         | 0.33254326   | 1.401446296 | 2.37050408   | 0.019966398 | -3.30121296  |
| UHRF2         | 0.311771046  | 2.303960633 | 2.370343558  | 0.01997453  | -3.301540269 |
| HMGB3P19      | 0.25503124   | 0.105133277 | 2.370043248  | 0.019989753 | -3.302152559 |
| RNY4P27       | 0.421996705  | 0.185507589 | 2.369058097  | 0.020039761 | -3.304160675 |
| HIST1H2APS4   | 0.217735005  | 0.273016165 | 2.368865169  | 0.020049568 | -3.30455385  |
| FAM76B        | 0.256731694  | 1.58361272  | 2.368618022  | 0.020062136 | -3.30505748  |
| MUC17         | 0.247107897  | 0.085212199 | 2.368216155  | 0.020082588 | -3.305876299 |
| HNRNPCP7      | 0.290707861  | 1.132635474 | 2.367696281  | 0.020109073 | -3.306935382 |
| LINC01047     | 0.207107079  | 0.0807189   | 2.367253639  | 0.020131648 | -3.307836971 |
| RP11-58A17.3  | 0.219875476  | 0.232187427 | 2.367214969  | 0.020133621 | -3.307915728 |
| CTD-2340D6.1  | 0.230117967  | 0.180056539 | 2.366883842  | 0.020150525 | -3.308590073 |
| AL031905.1    | 0.2995757    | 0.146285875 | 2.3667954    | 0.020155042 | -3.308770171 |
| RP11-864I4.1  | 0.221749677  | 1.380741175 | 2.366331404  | 0.020178754 | -3.309714939 |
| WDR27         | 0.324715214  | 1.315504955 | 2.366202848  | 0.020185328 | -3.30997667  |
| KLHL35        | 0.243508461  | 0.858024922 | 2.364521123  | 0.020271505 | -3.313399408 |
| TRIM24        | 0.238503602  | 2.152238065 | 2.363613038  | 0.020318174 | -3.315246714 |

|                  |              |             |              |             |              |
|------------------|--------------|-------------|--------------|-------------|--------------|
| RP11-497G19.2    | 0.247816312  | 0.141291381 | 2.363427854  | 0.020327702 | -3.315623357 |
| RN7SKP213        | 0.206195292  | 0.107334238 | 2.363210775  | 0.020338877 | -3.316064837 |
| RP11-192B18.1    | 0.217102794  | 0.078384524 | 2.363125192  | 0.020343285 | -3.316238878 |
| CHORDC1          | 0.321010276  | 1.886937441 | 2.362609432  | 0.020369862 | -3.317287621 |
| RP11-26H16.1     | 0.277722199  | 0.818359463 | 2.362111588  | 0.020395546 | -3.318299743 |
| RN7SL670P        | 0.227040622  | 0.163666227 | 2.36099817   | 0.020453091 | -3.320562665 |
| DHPS             | 0.36559803   | 3.852903861 | 2.360081854  | 0.020500557 | -3.3224243   |
| MIR24-2          | 0.30488444   | 0.368031961 | 2.359961158  | 0.020506817 | -3.322669466 |
| CREBBP           | 0.287597466  | 3.085476095 | 2.359857225  | 0.020512208 | -3.322880571 |
| RP11-384C12.1    | 0.235388004  | 0.105581509 | 2.359759082  | 0.0205173   | -3.323079911 |
| RNU6-1189P       | 0.265626232  | 0.344342361 | 2.35966951   | 0.020521949 | -3.323261834 |
| IL1B             | -0.234717495 | 0.57408278  | -2.359430284 | 0.020534369 | -3.323747682 |
| TYMP             | -0.668050152 | 3.685027599 | -2.359124618 | 0.020550247 | -3.3243684   |
| MDGA2            | 0.235942932  | 0.192399319 | 2.35858136   | 0.020578495 | -3.325471424 |
| AC092198.2       | 0.324718433  | 0.124654098 | 2.35844405   | 0.020585641 | -3.325750184 |
| RP11-323I14__A.1 | 0.267809036  | 0.154233552 | 2.358328802  | 0.02059164  | -3.325984141 |
| RNU6-768P        | 0.224762646  | 0.101618581 | 2.357792675  | 0.020619566 | -3.32707237  |
| RP11-115E19.1    | 0.21012179   | 0.092224714 | 2.35773635   | 0.020622502 | -3.327186687 |
| RNU7-175P        | 0.354477093  | 0.259761252 | 2.357589696  | 0.020630148 | -3.32748432  |
| RP11-160N1.8     | 0.213789034  | 0.079703191 | 2.35718109   | 0.020651465 | -3.328313502 |
| CERS2            | 0.332459901  | 5.440897954 | 2.357014111  | 0.020660182 | -3.328652316 |
| CARD9            | -0.222727896 | 1.009940138 | -2.356728294 | 0.02067511  | -3.329232211 |
| RP11-307I14.2    | 0.20358576   | 0.340108529 | 2.356575971  | 0.020683069 | -3.329541237 |
| AL158040.1       | 0.302922891  | 0.19987794  | 2.356519932  | 0.020685998 | -3.329654921 |
| FRG1             | -0.297548713 | 3.515700316 | -2.356475536 | 0.020688319 | -3.329744984 |
| RTN2             | -0.384177432 | 1.674242912 | -2.35628673  | 0.020698191 | -3.330127983 |
| RP11-336K24.5    | 0.294233886  | 0.153186639 | 2.356170127  | 0.02070429  | -3.330364505 |
| POLR2E           | -0.287323597 | 4.876590924 | -2.355990119 | 0.020713708 | -3.330729618 |
| RP11-95M15.1     | 0.238218881  | 0.114928689 | 2.35584995   | 0.020721044 | -3.331013907 |
| RN7SL225P        | 0.208215009  | 0.211658291 | 2.355660955  | 0.02073094  | -3.331397204 |
| RP11-21M7.2      | 0.2518048    | 0.207994049 | 2.354962404  | 0.020767553 | -3.332813685 |
| RNU6-777P        | 0.327758646  | 0.195042263 | 2.354875519  | 0.02077211  | -3.332989839 |
| AL117341.1       | 0.255585486  | 0.229477078 | 2.354760585  | 0.020778141 | -3.333222854 |

|               |              |             |              |             |              |
|---------------|--------------|-------------|--------------|-------------|--------------|
| RNY1P16       | 0.444052088  | 0.79847493  | 2.354368462  | 0.020798727 | -3.334017757 |
| MIR3135B      | 0.241975791  | 0.121208382 | 2.354163183  | 0.020809512 | -3.33443385  |
| AL391095.1    | 0.297852039  | 0.097549587 | 2.353838986  | 0.020826553 | -3.335090919 |
| RASGEF1A      | 0.344816653  | 0.642914023 | 2.353645005  | 0.020836756 | -3.335484035 |
| ATP5J2LP      | 0.221562348  | 0.207080226 | 2.353442856  | 0.020847393 | -3.335893673 |
| CU104787.1    | 0.414090519  | 0.338603093 | 2.353287407  | 0.020855576 | -3.336208657 |
| DIP2A         | 0.242222371  | 1.880989764 | 2.352982832  | 0.020871617 | -3.336825761 |
| SPRYD7        | 0.314557663  | 2.003696858 | 2.352613874  | 0.020891064 | -3.337573218 |
| HMGB1P19      | 0.246385168  | 0.244599295 | 2.352532709  | 0.020895344 | -3.337737633 |
| NMUR1         | 0.277585021  | 0.519812817 | 2.35248604   | 0.020897806 | -3.337832167 |
| WARS          | -0.39789028  | 4.289450134 | -2.35217912  | 0.020914    | -3.338453838 |
| SOSTDC1       | -0.485684999 | 0.542913128 | -2.351993734 | 0.020923787 | -3.338829305 |
| LSM4          | -0.305428142 | 4.503882356 | -2.351879752 | 0.020929806 | -3.339060143 |
| ENOSF1        | 0.277721095  | 1.596358059 | 2.351708423  | 0.020938857 | -3.339407102 |
| RP11-486A14.2 | 0.226763804  | 0.459797823 | 2.351658266  | 0.020941507 | -3.339508671 |
| FAUP2         | 0.316195732  | 0.205697241 | 2.351431156  | 0.020953511 | -3.339968551 |
| CASC11        | 0.321719398  | 0.149010301 | 2.351430246  | 0.020953559 | -3.339970394 |
| FAM58A        | -0.317112291 | 3.280844302 | -2.351308116 | 0.020960017 | -3.340217682 |
| RHOG          | -0.362238263 | 4.883925246 | -2.351039399 | 0.020974232 | -3.340761738 |
| CTD-2341M24.1 | -0.327322567 | 1.10548437  | -2.350954291 | 0.020978736 | -3.34093404  |
| FADS1         | 0.457406254  | 3.643431746 | 2.350512794  | 0.021002114 | -3.34182777  |
| RNA5SP317     | 0.431600764  | 0.990138493 | 2.350419921  | 0.021007034 | -3.342015755 |
| WDR31         | 0.214749507  | 0.966731458 | 2.350369987  | 0.021009681 | -3.342116824 |
| RP11-286B14.2 | 0.41004903   | 0.350883577 | 2.350239939  | 0.021016573 | -3.34238004  |
| RNU6-597P     | 0.378267821  | 0.404866563 | 2.350140372  | 0.021021852 | -3.342581555 |
| RTN3P1        | 0.339884619  | 1.203767645 | 2.349838817  | 0.021037846 | -3.343191828 |
| NDUFB8        | -0.36439503  | 3.503325083 | -2.349556205 | 0.021052846 | -3.343763705 |
| RP11-925D8.1  | 0.29447276   | 0.195210224 | 2.349555221  | 0.021052898 | -3.343765695 |
| HOOK2         | 0.372937748  | 1.935858263 | 2.349187577  | 0.021072425 | -3.344509547 |
| RPS3P6        | 0.445981246  | 1.50232611  | 2.349137429  | 0.02107509  | -3.344611003 |
| CHMP2A        | -0.296421493 | 4.467310725 | -2.349072806 | 0.021078524 | -3.344741742 |
| RNU6-687P     | 0.211038248  | 0.06235221  | 2.349059047  | 0.021079255 | -3.344769578 |
| RP11-148B3.2  | 0.244668327  | 0.142072026 | 2.348758223  | 0.02109525  | -3.345378129 |

|                |              |             |              |             |              |
|----------------|--------------|-------------|--------------|-------------|--------------|
| DNAJB9         | 0.392579878  | 3.558635444 | 2.34763521   | 0.021155053 | -3.347649326 |
| RP11-253I19.3  | 0.239680584  | 0.42333533  | 2.347523943  | 0.021160987 | -3.347874303 |
| AC019330.1     | 0.243973211  | 0.231856872 | 2.347285878  | 0.021173687 | -3.348355627 |
| SEPW1P         | 0.375807049  | 0.499118308 | 2.346946799  | 0.021191787 | -3.34904111  |
| RP11-395L14.11 | -0.314154517 | 1.940498805 | -2.346551882 | 0.021212886 | -3.349839369 |
| AC011516.1     | 0.212777178  | 0.090595489 | 2.345578285  | 0.02126498  | -3.35180683  |
| SAC3D1         | 0.444322527  | 3.650749957 | 2.345497066  | 0.021269331 | -3.351970925 |
| RP11-286H14.8  | 0.278847032  | 0.600351271 | 2.345288428  | 0.021280511 | -3.352392439 |
| RN7SL180P      | 0.352619816  | 0.377295815 | 2.345005139  | 0.0212957   | -3.352964719 |
| RP11-890B15.2  | 0.253395087  | 0.146735554 | 2.344843035  | 0.021304396 | -3.353292164 |
| CNPY2          | -0.318329098 | 3.434078792 | -2.344795024 | 0.021306972 | -3.35338914  |
| RNU6-554P      | 0.38072963   | 0.182291529 | 2.344788111  | 0.021307343 | -3.353403103 |
| PPP1R15B       | 0.296782592  | 3.740705627 | 2.34460412   | 0.021317218 | -3.353774728 |
| RP13-923O23.7  | 0.222768972  | 0.522962231 | 2.344436045  | 0.021326242 | -3.354114181 |
| RNU6-19P       | 0.473830252  | 0.588666471 | 2.344330904  | 0.021331889 | -3.354326519 |
| NDUFA2         | -0.392065861 | 4.496514173 | -2.344328462 | 0.021332202 | -3.35433145  |
| RP11-96D24.1   | 0.256770382  | 0.120465706 | 2.344309562  | 0.021333035 | -3.35436962  |
| CH17-132F21.4  | 0.285703281  | 0.125039807 | 2.344144334  | 0.021341912 | -3.354703286 |
| SELPLG         | -0.604791543 | 3.213166181 | -2.343679795 | 0.021366888 | -3.355641285 |
| AP001198.1     | 0.45215795   | 0.344369471 | 2.343662591  | 0.021367813 | -3.35567602  |
| RP11-26L16.1   | 0.225156218  | 0.137162098 | 2.343434744  | 0.021380073 | -3.356136028 |
| FBXO21         | 0.251969804  | 2.63514727  | 2.343313383  | 0.021386606 | -3.356381032 |
| RP11-325B23.2  | 0.213886802  | 0.084104915 | 2.343189744  | 0.021393263 | -3.356630623 |
| RP4-614O4.12   | 0.229860954  | 0.38870595  | 2.3429341    | 0.021407034 | -3.357146657 |
| NUBP1          | -0.228564992 | 2.969569948 | -2.342709194 | 0.021419155 | -3.357600603 |
| RP11-377K22.2  | 0.611099637  | 1.948329568 | 2.342203494  | 0.021446433 | -3.358621162 |
| MIR101-2       | 0.312393305  | 0.232357007 | 2.34219186   | 0.02144706  | -3.358644638 |
| NANOGNBP3      | 0.214188792  | 0.269658093 | 2.342135317  | 0.021450112 | -3.358758736 |
| NCOR1P2        | 0.235340848  | 0.219242371 | 2.342073192  | 0.021453466 | -3.358884095 |
| SHISA5         | -0.296850848 | 5.045154738 | -2.34206652  | 0.021453826 | -3.358897559 |
| RNU6ATAC14P    | 0.448075817  | 0.468571295 | 2.342012428  | 0.021456747 | -3.359006705 |
| GBP4           | -0.513474416 | 1.516314833 | -2.341821365 | 0.021467065 | -3.359392213 |
| MIR3692        | 0.228596267  | 0.117811738 | 2.341818026  | 0.021467245 | -3.359398951 |

|               |              |             |              |             |              |
|---------------|--------------|-------------|--------------|-------------|--------------|
| ACAP2-IT1     | 0.215110232  | 0.431729399 | 2.341810001  | 0.021467679 | -3.359415141 |
| C7orf43       | -0.250947736 | 2.333299312 | -2.341486472 | 0.021485161 | -3.360067864 |
| RP11-3M1.3    | 0.246788029  | 0.09628227  | 2.340967407  | 0.021513236 | -3.361114915 |
| LSM6P2        | 0.287327136  | 0.226157994 | 2.340602391  | 0.021532998 | -3.361851101 |
| RP11-22C8.1   | 0.253852506  | 0.165803895 | 2.340187649  | 0.021555472 | -3.362687456 |
| CTD-2145A24.5 | -0.226734797 | 0.554400538 | -2.340059947 | 0.021562396 | -3.362944949 |
| ENO1-IT1      | 0.345254941  | 0.663808838 | 2.339589179  | 0.021587938 | -3.36389408  |
| USE1          | -0.317613205 | 2.808832944 | -2.339582986 | 0.021588274 | -3.363906567 |
| CREG1         | -0.417519133 | 4.635218888 | -2.338853221 | 0.021627922 | -3.36537754  |
| CTBP2P1       | 0.291868488  | 0.278388859 | 2.338550542  | 0.021644386 | -3.365987528 |
| RP11-504P24.3 | 0.232179636  | 0.774121825 | 2.338495438  | 0.021647384 | -3.36609857  |
| TBC1D10C      | -0.221965258 | 0.536277813 | -2.338021068 | 0.021673212 | -3.367054409 |
| AL132671.1    | 0.463943343  | 0.180284241 | 2.337782038  | 0.021686236 | -3.367535979 |
| LCK           | -0.329435218 | 0.642947072 | -2.337737525 | 0.021688662 | -3.367625656 |
| MIR7856       | 0.420397142  | 0.627575032 | 2.337597432  | 0.0216963   | -3.367907876 |
| CTD-2547L16.3 | 0.202306801  | 0.159808554 | 2.337251818  | 0.021715152 | -3.368604058 |
| AC097361.1    | 0.237622587  | 0.103604315 | 2.337206816  | 0.021717608 | -3.368694701 |
| PIK3AP1       | -0.458042989 | 2.032058696 | -2.337104353 | 0.0217232   | -3.368901075 |
| CLEC1A        | -0.288958877 | 0.801921419 | -2.336807    | 0.021739437 | -3.36949994  |
| RP11-343J18.2 | 0.220246434  | 0.085816555 | 2.336566396  | 0.021752583 | -3.369984463 |
| ARHGAP4       | -0.4936839   | 2.443290607 | -2.33633542  | 0.021765209 | -3.370449558 |
| RP11-439L18.2 | 0.215393117  | 0.535834848 | 2.335515608  | 0.021810077 | -3.372100012 |
| RTTN          | 0.237041717  | 1.141499082 | 2.335316285  | 0.021820998 | -3.372501215 |
| RP11-142L4.2  | 0.242896804  | 0.487819991 | 2.335295939  | 0.021822113 | -3.372542167 |
| RP11-132A1.4  | 0.530364024  | 1.081303702 | 2.334313012  | 0.021876042 | -3.374520178 |
| RNA5SP398     | 0.232241156  | 0.09443387  | 2.334293803  | 0.021877098 | -3.374558825 |
| RNU4-75P      | 0.217884844  | 0.087731356 | 2.334128285  | 0.021886191 | -3.374891835 |
| PID1          | 0.528616021  | 2.343353608 | 2.333726405  | 0.021908283 | -3.375700302 |
| BRD2          | 0.295003542  | 5.162384434 | 2.33351352   | 0.021919994 | -3.376128516 |
| RP11-252K23.1 | 0.21092451   | 0.240401432 | 2.332790967  | 0.021959784 | -3.377581662 |
| RNY1P12       | 0.291684399  | 0.29354837  | 2.332091538  | 0.02199836  | -3.37898793  |
| GALM          | -0.434617129 | 3.409873056 | -2.332040497 | 0.022001178 | -3.379090537 |
| E2F1          | 0.364140136  | 3.865497637 | 2.331698032  | 0.02202009  | -3.379778949 |



|                    |              |             |              |             |              |
|--------------------|--------------|-------------|--------------|-------------|--------------|
| XXbac-BPG299F13.14 | 0.252669814  | 0.516568828 | 2.331149828  | 0.022050395 | -3.380880744 |
| CTD-2515A14.1      | 0.308311318  | 0.536056326 | 2.330955542  | 0.022061144 | -3.381271172 |
| RP11-561O4.1       | 0.246379944  | 0.165683849 | 2.330687046  | 0.022076006 | -3.381810682 |
| AP4E1              | 0.244222093  | 1.798761238 | 2.330646998  | 0.022078223 | -3.381891148 |
| CBWD1              | 0.207510962  | 0.777376812 | 2.330335482  | 0.022095479 | -3.382517023 |
| TIMM9P2            | 0.355414976  | 0.655895087 | 2.33008671   | 0.022109269 | -3.383016786 |
| PDZD2              | 0.361752437  | 1.457209372 | 2.329925512  | 0.022118208 | -3.383340596 |
| AC025750.7         | 0.213143294  | 0.137787205 | 2.329910418  | 0.022119045 | -3.383370914 |
| RNU6-59P           | 0.231371664  | 0.118047046 | 2.329229856  | 0.022156821 | -3.384737779 |
| MORC3              | 0.310424482  | 2.524692741 | 2.329041099  | 0.022167308 | -3.385116824 |
| RPL21P33           | 0.260499613  | 0.157412525 | 2.32885679   | 0.022177553 | -3.385486911 |
| MIR4288            | 0.244778489  | 0.182065101 | 2.328635035  | 0.022189885 | -3.385932155 |
| NIPSNAP1           | -0.462368125 | 3.377129653 | -2.328333153 | 0.022206682 | -3.386538219 |
| TDGF1P6            | 0.283868535  | 0.294966453 | 2.328195814  | 0.022214327 | -3.386813921 |
| WDR60              | 0.303842697  | 1.708703467 | 2.328187593  | 0.022214785 | -3.386830424 |
| RP11-380M21.1      | 0.209143167  | 0.197868237 | 2.327872447  | 0.022232337 | -3.387463009 |
| KIF24              | 0.219102315  | 1.080980038 | 2.327626518  | 0.022246044 | -3.387956606 |
| UBR3               | 0.29965131   | 2.494824017 | 2.327280993  | 0.022265313 | -3.388650021 |
| SLC15A3            | -0.444359167 | 2.431284744 | -2.327024065 | 0.022279651 | -3.389165578 |
| SNCG               | -0.5425557   | 1.743437502 | -2.326986188 | 0.022281765 | -3.389241578 |
| PI4K2A             | -0.261947103 | 3.093889487 | -2.32673676  | 0.022295694 | -3.38974203  |
| FAT3               | 0.680350825  | 2.970586583 | 2.32655955   | 0.022305594 | -3.390097556 |
| IL21-AS1           | 0.243210559  | 0.165968527 | 2.326266064  | 0.022321999 | -3.390686307 |
| SCX                | 0.887723695  | 2.580244146 | 2.325980665  | 0.022337963 | -3.391258773 |
| TP53I3             | -0.34027093  | 3.28557332  | -2.325767122 | 0.022349913 | -3.391687066 |
| SLMO1              | 0.276230366  | 1.689245346 | 2.325512582  | 0.022364166 | -3.392197542 |
| NAF1               | 0.256433016  | 1.794514819 | 2.325059752  | 0.022389541 | -3.393105563 |
| RNU7-34P           | 0.274809553  | 0.091933208 | 2.324904445  | 0.02239825  | -3.393416952 |
| C12orf5            | -0.311228529 | 2.323912389 | -2.324817798 | 0.02240311  | -3.393590669 |
| C18orf8            | 0.285910965  | 2.912974492 | 2.32459287   | 0.02241573  | -3.394041601 |
| RP11-900F13.2      | 0.266807521  | 0.135264588 | 2.324429177  | 0.022424919 | -3.394369744 |
| PHB2               | -0.373609458 | 5.83060025  | -2.324305207 | 0.02243188  | -3.394618246 |
| RP4-694B14.8       | 0.270090519  | 0.588927971 | 2.324242837  | 0.022435383 | -3.394743262 |

|                 |              |             |              |             |              |
|-----------------|--------------|-------------|--------------|-------------|--------------|
| MIR6130         | 0.260023242  | 0.091403435 | 2.324181677  | 0.022438818 | -3.394865853 |
| CEP57           | 0.282462808  | 2.534197174 | 2.324114569  | 0.022442588 | -3.395000362 |
| HELLS           | 0.344543818  | 1.902169713 | 2.323997641  | 0.022449158 | -3.395234718 |
| ZC3HAV1         | 0.266663515  | 3.644597833 | 2.323996719  | 0.02244921  | -3.395236566 |
| RNU1-78P        | 0.250950135  | 0.107129273 | 2.323733883  | 0.022463985 | -3.395763329 |
| AC093642.5      | 0.205554867  | 0.646909192 | 2.322891372  | 0.022511403 | -3.397451492 |
| TRIM46          | 0.228319401  | 0.685275502 | 2.321029842  | 0.022616488 | -3.401179602 |
| MIR518C         | 0.200086531  | 0.11369447  | 2.320841969  | 0.022627118 | -3.401555713 |
| LINC01548       | 0.256048612  | 0.099713938 | 2.320727468  | 0.022633599 | -3.401784925 |
| RP11-331H2.3    | 0.239780172  | 0.116814566 | 2.320513007  | 0.022645741 | -3.402214213 |
| RP11-711C17.1   | 0.257401545  | 0.127498967 | 2.320462967  | 0.022648575 | -3.402314373 |
| RP11-785D18.3   | -0.434565346 | 1.088740072 | -2.320422392 | 0.022650873 | -3.402395586 |
| RP11-38J22.2    | 0.263534238  | 0.114993929 | 2.320058644  | 0.022671485 | -3.403123598 |
| MYO9A           | 0.291641759  | 2.047995355 | 2.320053028  | 0.022671804 | -3.403134836 |
| PTGES3P4        | 0.343629128  | 0.568117295 | 2.320040306  | 0.022672525 | -3.403160298 |
| RP11-24D15.1    | 0.266798715  | 0.115364409 | 2.319971465  | 0.022676428 | -3.403298065 |
| RP11-1094M14.12 | 0.237431127  | 0.083672133 | 2.319591303  | 0.022697992 | -3.404058797 |
| APOL3           | -0.443630169 | 1.665586279 | -2.319587119 | 0.022698229 | -3.404067169 |
| PM20D2          | 0.426275618  | 2.308950157 | 2.319160422  | 0.022722455 | -3.404920888 |
| CALM2P2         | 0.326042077  | 2.116043224 | 2.318908833  | 0.02273675  | -3.405424194 |
| AC092155.1      | 0.25892301   | 0.647410923 | 2.318776583  | 0.022744267 | -3.405688744 |
| RNU6-577P       | 0.211891547  | 0.242441718 | 2.318761124  | 0.022745146 | -3.405719667 |
| SLFN11          | 0.537568175  | 2.98202603  | 2.318757503  | 0.022745351 | -3.405726909 |
| GTF3C4          | 0.273877681  | 2.677228531 | 2.318671159  | 0.022750261 | -3.405899621 |
| POLA2           | 0.235412819  | 2.483533441 | 2.31857025   | 0.022755999 | -3.406101459 |
| LRRC23          | -0.286643638 | 1.615906682 | -2.318324534 | 0.022769978 | -3.406592908 |
| RN7SL278P       | 0.240675062  | 0.128151403 | 2.318257413  | 0.022773798 | -3.406727145 |
| AC116618.1      | 0.286587785  | 0.264473391 | 2.318148948  | 0.022779972 | -3.406944063 |
| RP11-715G15.2   | 0.218688687  | 0.102312024 | 2.318091267  | 0.022783256 | -3.407059414 |
| LGMNP1          | -0.210427636 | 0.933644351 | -2.317997704 | 0.022788584 | -3.407246519 |
| RNU6-413P       | 0.240521997  | 0.092549357 | 2.31744413   | 0.022820128 | -3.408353402 |
| DKAKD           | -0.276702097 | 3.695716723 | -2.316315156 | 0.022884579 | -3.410610092 |
| CCNL1           | 0.302488123  | 2.59749579  | 2.3162668    | 0.022887343 | -3.410706728 |

|                |              |             |              |             |              |
|----------------|--------------|-------------|--------------|-------------|--------------|
| INPP1          | 0.295904936  | 2.710859054 | 2.316107015  | 0.022896479 | -3.411026038 |
| AC012671.3     | 0.226423634  | 0.085702359 | 2.315598576  | 0.022925571 | -3.412041956 |
| RNU6-104P      | 0.206530523  | 0.089499284 | 2.315024261  | 0.022958471 | -3.413189269 |
| RANBP6         | 0.316388207  | 2.490509173 | 2.314972083  | 0.022961462 | -3.413293493 |
| KIAA0368       | 0.259042145  | 3.919348176 | 2.31487255   | 0.022967169 | -3.413492301 |
| PSMA5          | -0.291266337 | 4.014801618 | -2.314774711 | 0.02297278  | -3.413687718 |
| BRWD3          | 0.254562454  | 1.695640981 | 2.314705707  | 0.022976738 | -3.413825538 |
| AP001432.14    | 0.26308117   | 0.857142214 | 2.314439777  | 0.022991997 | -3.414356639 |
| TMEM263        | 0.286023424  | 4.786658503 | 2.314386846  | 0.022995035 | -3.414462345 |
| RP11-567G24.3  | 0.210144531  | 0.104619751 | 2.313934192  | 0.023021032 | -3.415366222 |
| PHLDB1         | 0.300511344  | 2.68099568  | 2.313722306  | 0.023033209 | -3.41578927  |
| RP11-512M8.11  | 0.273419878  | 0.319639656 | 2.313586899  | 0.023040995 | -3.416059604 |
| RP11-478B9.2   | 0.208718438  | 0.097318111 | 2.313443189  | 0.02304926  | -3.416346502 |
| OR7L1P         | 0.232714052  | 0.08183324  | 2.313187964  | 0.023063945 | -3.416855981 |
| PTCH2          | 0.351338324  | 1.081690709 | 2.313169749  | 0.023064994 | -3.41689234  |
| RNU6-216P      | 0.414867111  | 0.765757208 | 2.313113183  | 0.02306825  | -3.417005249 |
| NICN1          | -0.237314826 | 1.935898953 | -2.311877661 | 0.023139469 | -3.419470836 |
| AC092106.2     | 0.201113477  | 0.366008486 | 2.311867564  | 0.023140052 | -3.41949098  |
| CTD-2192J16.11 | 0.225290845  | 0.32545258  | 2.311827945  | 0.023142339 | -3.419570024 |
| ZFP90          | -0.209209651 | 2.027655739 | -2.311823338 | 0.023142605 | -3.419579217 |
| RNA5SP418      | 0.319703941  | 0.107695332 | 2.311100681  | 0.023184356 | -3.421020776 |
| NBEAP1         | 0.247158543  | 0.218700794 | 2.310597312  | 0.023213477 | -3.422024664 |
| AC195454.1     | 0.33468466   | 0.229060905 | 2.310566495  | 0.023215261 | -3.422086118 |
| TXNDC15        | -0.22892317  | 3.34954917  | -2.310369363 | 0.023226675 | -3.42247921  |
| AC079603.1     | 0.346115697  | 0.123523601 | 2.310185824  | 0.023237307 | -3.42284517  |
| AC067742.1     | 0.235542187  | 0.160042914 | 2.310080374  | 0.023243417 | -3.423055418 |
| DIXDC1         | 0.275666025  | 1.673110512 | 2.309951428  | 0.02325089  | -3.423312498 |
| ZNF517         | -0.353851807 | 1.764856253 | -2.309277439 | 0.023289988 | -3.424656035 |
| AL365202.1     | 0.212258259  | 0.238655219 | 2.309132657  | 0.023298395 | -3.4249446   |
| MIR6715A       | 0.230810177  | 0.099954478 | 2.308405244  | 0.023340671 | -3.42639417  |
| AC011313.1     | 0.376229815  | 0.134699583 | 2.308238393  | 0.023350377 | -3.426726608 |
| RP11-692M12.5  | 0.232196974  | 0.373866258 | 2.308212567  | 0.02335188  | -3.426778063 |
| DYNLT1         | -0.297196482 | 3.864484369 | -2.308187889 | 0.023353316 | -3.426827229 |

|               |              |             |              |             |              |
|---------------|--------------|-------------|--------------|-------------|--------------|
| TRDC          | -0.606468642 | 0.872963435 | -2.308048109 | 0.023361451 | -3.427105712 |
| AL162151.4    | 0.220074558  | 0.085320563 | 2.307798531  | 0.023375983 | -3.427602904 |
| FAM208B       | 0.281234252  | 2.429953892 | 2.30731407   | 0.023404215 | -3.428567883 |
| AP2A2         | -0.223411943 | 3.16620176  | -2.307218492 | 0.023409788 | -3.42875824  |
| RP11-313E4.1  | 0.266188344  | 0.169115114 | 2.307189068  | 0.023411504 | -3.42881684  |
| RP11-53I6.4   | 0.290702488  | 0.484149158 | 2.307164623  | 0.023412929 | -3.428865523 |
| ERBB4         | 0.291659791  | 0.455346533 | 2.307107649  | 0.023416253 | -3.42897899  |
| PTS           | 0.291679789  | 2.958090976 | 2.306616127  | 0.023444939 | -3.429957773 |
| GSTK1         | -0.268335211 | 3.81478724  | -2.306095886 | 0.023475335 | -3.430993548 |
| D4S234E       | 0.335950507  | 0.381491462 | 2.305949179  | 0.023483913 | -3.431285599 |
| C21orf33      | -0.408829981 | 1.207532953 | -2.305794727 | 0.023492947 | -3.431593049 |
| CTB-191K22.6  | 0.230827108  | 0.296338303 | 2.305772701  | 0.023494236 | -3.431636891 |
| TCP11L2       | 0.201895042  | 0.914815797 | 2.305681041  | 0.023499598 | -3.431819339 |
| CTD-3179P9.1  | 0.230456965  | 0.161661498 | 2.305519446  | 0.023509056 | -3.432140975 |
| MAMDC4        | 0.258053202  | 0.810683642 | 2.305384991  | 0.023516927 | -3.432408577 |
| MIR6728       | 0.31387224   | 0.387111499 | 2.305270484  | 0.023523633 | -3.432636465 |
| SMCHD1        | 0.337450218  | 2.423871034 | 2.304765285  | 0.023553237 | -3.433641783 |
| DTD1          | -0.324697124 | 2.612110659 | -2.304756911 | 0.023553728 | -3.433658445 |
| FNBP1P1       | 0.258353395  | 0.815123048 | 2.304710801  | 0.023556432 | -3.43375019  |
| RNU6-644P     | 0.363713072  | 0.200844027 | 2.304680148  | 0.023558229 | -3.433811182 |
| COX14         | -0.330342146 | 4.177346905 | -2.304671593 | 0.023558731 | -3.433828203 |
| MIR5698       | 0.29458362   | 0.18545316  | 2.30463415   | 0.023560927 | -3.433902702 |
| RP11-134G8.5  | 0.227977288  | 0.963928058 | 2.303991114  | 0.023598667 | -3.435181963 |
| RP11-272K23.3 | 0.238760565  | 0.111463974 | 2.303917531  | 0.023602989 | -3.435328331 |
| ELP6          | -0.242444375 | 2.880987123 | -2.303533503 | 0.023625557 | -3.43609215  |
| IKZF3         | -0.431547465 | 0.692689292 | -2.303049868 | 0.023654005 | -3.437053925 |
| KMT2E         | 0.289616657  | 2.962306173 | 2.302982702  | 0.023657958 | -3.43718748  |
| ENTPD7        | 0.364369275  | 2.876569071 | 2.302794063  | 0.023669064 | -3.437562558 |
| RNA5SP79      | 0.20022645   | 0.13732178  | 2.301907608  | 0.023721315 | -3.439324766 |
| TUBA8P2       | 0.213652355  | 0.145257335 | 2.301470652  | 0.023747109 | -3.440193184 |
| RNU1-141P     | 0.29437695   | 0.138494332 | 2.300840402  | 0.023784355 | -3.441445507 |
| AC092289.2    | 0.294329398  | 0.141886444 | 2.300524899  | 0.023803021 | -3.442072308 |
| RNU1-101P     | 0.267169331  | 0.133797707 | 2.300476581  | 0.02380588  | -3.442168292 |

|               |              |             |              |             |              |
|---------------|--------------|-------------|--------------|-------------|--------------|
| DBP           | -0.273708322 | 1.236743071 | -2.300342587 | 0.023813812 | -3.442434467 |
| URB1          | 0.344389255  | 2.581561053 | 2.300141021  | 0.023825748 | -3.442834845 |
| RP11-114F3.5  | 0.225218558  | 0.635964208 | 2.300050426  | 0.023831115 | -3.443014787 |
| FBXL19-AS1    | 0.245515262  | 0.89659194  | 2.299963927  | 0.02383624  | -3.443186587 |
| MIR4681       | 0.207483846  | 0.097133174 | 2.299600554  | 0.023857779 | -3.443908241 |
| MTR           | 0.294704796  | 2.411239427 | 2.299432018  | 0.023867775 | -3.444242919 |
| LUZP4P1       | 0.230113507  | 0.112537844 | 2.299390233  | 0.023870254 | -3.444325891 |
| RNU6-950P     | 0.268111702  | 0.127616098 | 2.299375913  | 0.023871104 | -3.444354327 |
| RP11-471J7.1  | 0.277696208  | 0.581388576 | 2.29917666   | 0.023882928 | -3.444749965 |
| RBP1          | -0.336220153 | 0.849451152 | -2.299169636 | 0.023883345 | -3.44476391  |
| RP11-101O6.2  | 0.211203189  | 0.348903046 | 2.299091288  | 0.023887996 | -3.44491947  |
| MIR3143       | 0.235359232  | 0.190237424 | 2.299081411  | 0.023888582 | -3.44493908  |
| STARD3        | -0.216030255 | 3.342710361 | -2.298790834 | 0.023905839 | -3.445515978 |
| ARFGEF2       | 0.288258181  | 2.737386941 | 2.298667864  | 0.023913145 | -3.445760096 |
| RN7SL339P     | 0.215568539  | 0.078485503 | 2.298648509  | 0.023914295 | -3.445798518 |
| HIST1H2BC     | -0.553357056 | 2.595272546 | -2.298628905 | 0.02391546  | -3.445837435 |
| CD2           | -0.504137566 | 0.999389328 | -2.298573177 | 0.023918772 | -3.445948061 |
| CTSW          | -0.447055843 | 1.216209929 | -2.298561027 | 0.023919494 | -3.44597218  |
| SNORD6        | 0.448290996  | 1.695875604 | 2.298463628  | 0.023925284 | -3.446165519 |
| RBM42         | -0.313871234 | 5.196378042 | -2.29821145  | 0.023940279 | -3.446666067 |
| GPC5-AS1      | 0.304922202  | 0.157415757 | 2.298188506  | 0.023941644 | -3.446711606 |
| RP11-726G23.6 | 0.215227215  | 0.096007875 | 2.297807184  | 0.023964336 | -3.447468391 |
| PPP2R1B       | 0.274669033  | 2.479085385 | 2.297629001  | 0.023974946 | -3.447821983 |
| AP5B1         | 0.318889631  | 2.044579394 | 2.297357957  | 0.023991094 | -3.448359806 |
| RP11-20B24.3  | 0.235833713  | 0.135646627 | 2.296901721  | 0.024018296 | -3.449264969 |
| KISS1         | 0.236711884  | 0.145235958 | 2.296816132  | 0.024023402 | -3.449434759 |
| RNU6-131P     | 0.319997158  | 0.158962105 | 2.296771883  | 0.024026042 | -3.449522538 |
| AC018902.1    | 0.502672066  | 0.400864859 | 2.296741418  | 0.02402786  | -3.449582971 |
| C1QTNF1-AS1   | 0.476389509  | 1.025228799 | 2.296670475  | 0.024032094 | -3.449723699 |
| TPT1P12       | 0.220317181  | 0.393045849 | 2.296588849  | 0.024036966 | -3.449885612 |
| SNORD11       | 0.307546071  | 0.546514021 | 2.296214619  | 0.024059314 | -3.450627873 |
| MED28P1       | 0.225453593  | 0.155099008 | 2.295960971  | 0.024074472 | -3.451130906 |
| FANCC         | 0.248357199  | 2.07067908  | 2.295659045  | 0.024092525 | -3.45172962  |

|               |              |             |              |             |              |
|---------------|--------------|-------------|--------------|-------------|--------------|
| UBE2L4        | 0.352380504  | 0.819452348 | 2.2952234    | 0.024118596 | -3.452593378 |
| APOBEC3C      | -0.393265945 | 4.091034115 | -2.295200821 | 0.024119948 | -3.452638141 |
| DNAJC3-AS1    | 0.343507019  | 1.209422323 | 2.295116379  | 0.024125004 | -3.452805548 |
| ARL13B        | 0.243972306  | 1.734364713 | 2.294732255  | 0.024148018 | -3.453567002 |
| RNU7-160P     | 0.264689507  | 0.264185299 | 2.294547262  | 0.024159108 | -3.453933677 |
| NDUFA11       | -0.31818211  | 3.152879907 | -2.294310618 | 0.024173301 | -3.454402692 |
| LINC01551     | 0.323124643  | 0.202148635 | 2.294255272  | 0.024176621 | -3.454512378 |
| TMEM208       | -0.392938374 | 4.462580804 | -2.294238405 | 0.024177633 | -3.454545804 |
| TMEM42        | -0.25974888  | 1.921529431 | -2.294212539 | 0.024179185 | -3.454597065 |
| RP11-449H3.2  | 0.379974647  | 0.523165147 | 2.294135967  | 0.02418378  | -3.454748812 |
| RELN          | 0.282120261  | 0.385592202 | 2.293913737  | 0.024197121 | -3.455189192 |
| RABGAP1L      | 0.30665136   | 1.874951326 | 2.293849579  | 0.024200973 | -3.455316321 |
| CTD-2550O8.7  | 0.210046341  | 0.317356888 | 2.293727257  | 0.02420832  | -3.455558697 |
| CLEC7A        | -0.337412928 | 1.261389759 | -2.293395072 | 0.024228281 | -3.45621685  |
| RNU6-147P     | 0.271454572  | 0.272519513 | 2.293378473  | 0.024229279 | -3.456249737 |
| UTP18         | 0.292915707  | 3.853084606 | 2.292824823  | 0.024262581 | -3.457346482 |
| DOCK8         | -0.242400402 | 1.011661877 | -2.292821517 | 0.02426278  | -3.45735303  |
| RP11-76N22.1  | 0.30437646   | 0.170718522 | 2.292650359  | 0.024273084 | -3.457692037 |
| RP11-91J19.3  | -0.311244741 | 0.992718613 | -2.29260505  | 0.024275812 | -3.457781775 |
| MIR4500HG     | 0.201377887  | 0.148087767 | 2.29254896   | 0.02427919  | -3.457892863 |
| PTBP1         | 0.232619321  | 5.427994562 | 2.292339767  | 0.024291791 | -3.458307158 |
| NDUFA5P2      | 0.291942933  | 0.2050309   | 2.292191087  | 0.02430075  | -3.458601589 |
| MXD4          | -0.276573459 | 3.943101152 | -2.291758264 | 0.024326849 | -3.459458616 |
| RP11-301G19.1 | 0.249166314  | 0.120058557 | 2.291676308  | 0.024331794 | -3.45962088  |
| RP11-567M16.2 | 0.203223691  | 0.153495543 | 2.291493215  | 0.024342844 | -3.459983366 |
| LINC01194     | 0.205415852  | 0.218857698 | 2.291201519  | 0.024360457 | -3.460560811 |
| RPL32P28      | 0.282996999  | 0.138985582 | 2.29064975   | 0.024393804 | -3.461652923 |
| RP11-216P6.2  | 0.235051974  | 0.219905524 | 2.290350956  | 0.02441188  | -3.462244226 |
| RP11-528A10.1 | 0.214949441  | 0.251715668 | 2.28954795   | 0.024460515 | -3.463833016 |
| RN7SL822P     | 0.238218753  | 0.109306757 | 2.289219507  | 0.024480432 | -3.464482718 |
| HARS2         | -0.258841783 | 2.982743755 | -2.288967372 | 0.024495732 | -3.464981417 |
| AC006534.2    | 0.463976833  | 0.326188748 | 2.288709189  | 0.024511407 | -3.465492028 |
| ZDHHC21       | 0.252419478  | 1.132947855 | 2.288662983  | 0.024514213 | -3.465583405 |

|               |              |             |              |             |              |
|---------------|--------------|-------------|--------------|-------------|--------------|
| TTLL11        | 0.241420302  | 1.584166304 | 2.288605533  | 0.024517703 | -3.465697016 |
| MIR527        | 0.216631271  | 0.09297596  | 2.28846205   | 0.02452642  | -3.46598075  |
| WDR25         | -0.209161835 | 1.651195766 | -2.288383763 | 0.024531177 | -3.466135554 |
| PHOX2A        | 0.278128152  | 0.270302255 | 2.288047148  | 0.024551642 | -3.466801124 |
| USF1          | -0.261939671 | 4.430237535 | -2.287775136 | 0.024568191 | -3.467338894 |
| RNU4ATAC5P    | 0.343605891  | 0.145674595 | 2.286934353  | 0.024619404 | -3.469000776 |
| RP11-288I21.1 | 0.202758161  | 0.587567881 | 2.286585596  | 0.024640674 | -3.469689968 |
| CEP290        | 0.262020561  | 1.377483843 | 2.28657222   | 0.02464149  | -3.4697164   |
| RNU7-2P       | 0.218948481  | 0.082587108 | 2.286520202  | 0.024644664 | -3.469819186 |
| CTNS          | -0.305740535 | 2.810984146 | -2.286503142 | 0.024645705 | -3.469852895 |
| SLC25A52      | 0.246582908  | 0.258314432 | 2.286461081  | 0.024648272 | -3.469936005 |
| TK2           | -0.269777556 | 2.283438177 | -2.286214459 | 0.024663328 | -3.470423286 |
| LHPP          | -0.296972647 | 1.853828639 | -2.28616311  | 0.024666463 | -3.470524737 |
| MIR3197       | 0.294384909  | 0.227813402 | 2.286030078  | 0.024674589 | -3.470787558 |
| RP1-179N16.3  | 0.209943124  | 0.346338595 | 2.286001204  | 0.024676353 | -3.470844601 |
| CTD-2168K21.1 | 0.213868129  | 0.112582111 | 2.285940576  | 0.024680057 | -3.470964375 |
| RNU4ATAC17P   | 0.2714576    | 0.094331493 | 2.285711865  | 0.024694034 | -3.471416177 |
| CTB-31N19.2   | 0.246399095  | 0.179425171 | 2.285542461  | 0.024704392 | -3.471750798 |
| RP11-214K3.22 | 0.211962939  | 0.45917524  | 2.285385536  | 0.02471399  | -3.472060749 |
| SH3TC1        | -0.258063885 | 1.169777841 | -2.284805479 | 0.024749496 | -3.473206292 |
| RN7SL402P     | 0.215091782  | 0.117087494 | 2.284688974  | 0.024756633 | -3.473436344 |
| GPR153        | 0.637911187  | 4.117648422 | 2.284650971  | 0.024758961 | -3.473511383 |
| AL590084.1    | 0.280993177  | 0.12910914  | 2.284536902  | 0.024765951 | -3.473736612 |
| GAPDHP68      | 0.292414657  | 0.562543222 | 2.284392206  | 0.024774821 | -3.474022299 |
| AC097721.2    | 0.238425114  | 0.459647052 | 2.284090917  | 0.024793297 | -3.474617113 |
| AC104654.2    | -0.34694176  | 0.664209178 | -2.283748076 | 0.024814337 | -3.475293878 |
| RP11-179G8.1  | 0.249292769  | 0.102916171 | 2.283704632  | 0.024817004 | -3.475379629 |
| RP11-666A8.11 | 0.226734803  | 0.197980294 | 2.283696188  | 0.024817523 | -3.475396296 |
| RBL1          | 0.305078033  | 2.30360021  | 2.283582351  | 0.024824513 | -3.475620983 |
| TMEM245       | 0.267545038  | 3.042221353 | 2.283221988  | 0.024846653 | -3.476332194 |
| AC004054.1    | 0.223179377  | 0.086815283 | 2.283191433  | 0.024848531 | -3.476392494 |
| FBXL15        | -0.350241715 | 2.445690605 | -2.282349688 | 0.024900318 | -3.478053354 |
| EPOR          | 0.312287389  | 1.820712737 | 2.282305777  | 0.024903022 | -3.478139981 |

|               |              |             |              |             |              |
|---------------|--------------|-------------|--------------|-------------|--------------|
| RNU7-11P      | 0.329649939  | 0.348168702 | 2.281884427  | 0.024928983 | -3.478971138 |
| AC006372.6    | 0.210463058  | 0.100923354 | 2.281807391  | 0.024933732 | -3.479123085 |
| EDC3          | 0.256764377  | 3.183115965 | 2.281193455  | 0.024971607 | -3.480333862 |
| RNU6-1122P    | 0.30455097   | 0.181430645 | 2.281126458  | 0.024975744 | -3.480465972 |
| SEC13         | -0.250155853 | 4.685254132 | -2.281024416 | 0.024982045 | -3.480667182 |
| FUBP1         | 0.281675501  | 4.012186176 | 2.280873883  | 0.024991343 | -3.480963993 |
| ZNF611        | 0.245935482  | 1.729019847 | 2.280805979  | 0.024995538 | -3.481097877 |
| RP4-533D7.4   | 0.242294825  | 0.378570693 | 2.280627545  | 0.025006565 | -3.481449669 |
| RP11-432M8.6  | 0.31397992   | 0.162948506 | 2.280073366  | 0.02504084  | -3.482542114 |
| MTND4LP1      | 0.501263876  | 1.265592704 | 2.279109494  | 0.025100552 | -3.484441622 |
| RP11-47L3.1   | -0.216345076 | 0.456120791 | -2.279083125 | 0.025102187 | -3.484493577 |
| AL121594.1    | 0.328464224  | 0.43724046  | 2.278989339  | 0.025108004 | -3.484678364 |
| RNA5SP385     | 0.287005798  | 0.505814588 | 2.278859064  | 0.025116087 | -3.48493503  |
| NF1           | 0.229888975  | 1.750309802 | 2.278853714  | 0.025116419 | -3.484945571 |
| RP11-452H21.1 | 0.214297074  | 0.200098705 | 2.278847267  | 0.025116819 | -3.484958273 |
| RP1-5O6.5     | 0.245218001  | 0.199543776 | 2.278728829  | 0.025124169 | -3.485191608 |
| ANLN          | 0.370967701  | 3.501468403 | 2.278029127  | 0.02516763  | -3.486569871 |
| RTCB          | -0.295280526 | 4.703362499 | -2.277957352 | 0.025172092 | -3.486711233 |
| IST1          | -0.22650528  | 3.706227532 | -2.277791593 | 0.025182399 | -3.487037678 |
| C17orf107     | 0.443997785  | 1.191224229 | 2.277529032  | 0.025198733 | -3.487554725 |
| HOXB4         | 0.337644501  | 1.450261922 | 2.277078764  | 0.025226767 | -3.488441291 |
| RP11-996F15.6 | -0.21357614  | 1.034589482 | -2.276952157 | 0.025234654 | -3.488690548 |
| CCDC170       | -0.280554602 | 0.867105504 | -2.276355632 | 0.025271846 | -3.489864795 |
| C1orf50       | -0.229780489 | 2.355467691 | -2.276328275 | 0.025273552 | -3.489918639 |
| APOL6         | -0.536448969 | 2.808083324 | -2.275922359 | 0.025298889 | -3.490717514 |
| ARHGAP24      | -0.295348686 | 1.500520959 | -2.275385493 | 0.025332434 | -3.491773916 |
| LCLAT1        | 0.299464691  | 2.111098753 | 2.275349879  | 0.025334661 | -3.491843987 |
| ACTR8         | -0.278020314 | 2.568046867 | -2.275283508 | 0.025338811 | -3.49197457  |
| SNRPGP14      | 0.36564208   | 0.455504464 | 2.275125574  | 0.025348689 | -3.492285286 |
| RNU6-353P     | 0.40385228   | 0.326978679 | 2.275098484  | 0.025350383 | -3.492338581 |
| CEP95         | 0.248115108  | 1.921222104 | 2.274995077  | 0.025356853 | -3.49254201  |
| CITF22-92A6.1 | -0.22406907  | 1.059320875 | -2.274259593 | 0.025402911 | -3.493988664 |
| AC093430.1    | 0.337793811  | 0.15589812  | 2.274241327  | 0.025404055 | -3.494024586 |



|               |              |             |              |             |              |
|---------------|--------------|-------------|--------------|-------------|--------------|
| SEC24C        | 0.303364181  | 2.765091566 | 2.273882189  | 0.025426573 | -3.494730835 |
| SMN1          | -0.219218583 | 1.445323972 | -2.273782951 | 0.025432798 | -3.494925971 |
| GABPB2        | 0.334508929  | 2.272532632 | 2.272988543  | 0.02548268  | -3.496487777 |
| SMKR1         | 0.411508998  | 0.836149188 | 2.272764733  | 0.025496749 | -3.496927701 |
| RNU5A-7P      | 0.267138681  | 0.190058313 | 2.272696789  | 0.025501022 | -3.497061245 |
| TROVE2        | 0.329251818  | 2.546466069 | 2.272145025  | 0.02553574  | -3.498145608 |
| JAK2          | 0.362895346  | 1.871065237 | 2.272045517  | 0.025542006 | -3.498341145 |
| DDX46         | 0.228993079  | 2.729432635 | 2.271913772  | 0.025550304 | -3.498600013 |
| ACOT11        | 0.236005685  | 0.926900458 | 2.27170515   | 0.025563448 | -3.499009914 |
| RNU6-517P     | 0.207609471  | 0.222990166 | 2.271658415  | 0.025566394 | -3.499101735 |
| RP11-295M3.2  | 0.206281381  | 0.234431247 | 2.271413331  | 0.025581845 | -3.499583225 |
| AC016716.2    | 0.216981644  | 0.123459532 | 2.271068201  | 0.025603617 | -3.50026119  |
| TSEN15        | 0.317927457  | 3.742624918 | 2.271038399  | 0.025605498 | -3.500319728 |
| CHD2          | 0.2561401    | 2.427041495 | 2.270491641  | 0.025640026 | -3.501393566 |
| RNU6-1315P    | 0.298566047  | 0.315101389 | 2.270300037  | 0.025652135 | -3.501769824 |
| SERINC3       | 0.251141551  | 5.17388406  | 2.270273634  | 0.025653804 | -3.50182167  |
| MCM2          | 0.391956153  | 4.094345205 | 2.269981099  | 0.025672303 | -3.502396071 |
| MED21         | -0.259751129 | 2.790982111 | -2.269856045 | 0.025680215 | -3.502641598 |
| RAB20         | -0.46237702  | 2.665962634 | -2.269797456 | 0.025683922 | -3.502756625 |
| CTC-661I16.2  | 0.339189484  | 0.21625731  | 2.269238342  | 0.025719325 | -3.503854201 |
| GPC3          | -0.68681624  | 1.425985536 | -2.269220203 | 0.025720475 | -3.503889806 |
| AL354981.1    | 0.350564174  | 0.163405642 | 2.269058023  | 0.025730752 | -3.504208127 |
| RNU6-256P     | 0.253834771  | 0.10760386  | 2.268853217  | 0.025743737 | -3.504610087 |
| SEC63P2       | 0.214775451  | 0.085142115 | 2.268042605  | 0.025795184 | -3.506200711 |
| RP11-289K10.1 | 0.219851479  | 0.349110995 | 2.26798477   | 0.025798858 | -3.506314179 |
| VKORC1        | -0.337662034 | 4.226086724 | -2.267905299 | 0.025803907 | -3.506470091 |
| SAPCD2        | 0.504481817  | 2.670417475 | 2.267731776  | 0.025814936 | -3.506810503 |
| LRRRC29       | -0.209193415 | 0.925620987 | -2.267608428 | 0.025822777 | -3.507052469 |
| GRIK1-AS1     | 0.287752527  | 0.18696389  | 2.267138083  | 0.025852699 | -3.507975021 |
| AL157392.1    | 0.223911982  | 0.209756334 | 2.267128061  | 0.025853336 | -3.507994676 |
| CCDC71        | -0.283188504 | 3.400113552 | -2.267029459 | 0.025859613 | -3.508188056 |
| MRPL40        | -0.353622466 | 3.788794152 | -2.266772493 | 0.025875977 | -3.508691986 |
| CSTL1         | 0.21548646   | 0.120496066 | 2.266294753  | 0.025906424 | -3.509628736 |

|               |              |             |              |             |              |
|---------------|--------------|-------------|--------------|-------------|--------------|
| CTD-2231E14.2 | 0.270060723  | 0.908756823 | 2.266087641  | 0.025919633 | -3.510034786 |
| CTD-2311M21.5 | 0.261363586  | 0.202776852 | 2.265457819  | 0.025959838 | -3.511269375 |
| KRTAP19-6     | 0.352424632  | 0.137744843 | 2.265301184  | 0.025969846 | -3.511576366 |
| RP11-97C16.1  | -0.335069515 | 1.785266088 | -2.265032053 | 0.025987049 | -3.512103798 |
| GS1-259H13.7  | 0.236273383  | 0.59241027  | 2.264987069  | 0.025989925 | -3.51219195  |
| SHFM1         | -0.37243206  | 3.028177266 | -2.264827891 | 0.026000105 | -3.512503869 |
| MCM8          | 0.304449889  | 2.078237383 | 2.264627869  | 0.026012903 | -3.512895797 |
| PPFIA4        | 0.311480653  | 0.84799842  | 2.264487479  | 0.026021888 | -3.513170862 |
| RN7SL756P     | 0.255836326  | 0.1590838   | 2.26437348   | 0.026029187 | -3.513394209 |
| AC016727.3    | 0.333437589  | 0.194732192 | 2.264307855  | 0.026033389 | -3.513522776 |
| RP11-321M21.3 | 0.248951221  | 0.107254984 | 2.264027264  | 0.026051363 | -3.514072454 |
| RP11-110I1.12 | 0.378604342  | 1.574564994 | 2.263794817  | 0.026066262 | -3.514527771 |
| EMB           | -0.467649021 | 1.490179409 | -2.263744285 | 0.026069502 | -3.514626748 |
| SNRPEP5       | 0.230660633  | 0.330571426 | 2.263627307  | 0.026077003 | -3.514855866 |
| AC004447.2    | -0.285987828 | 2.579853496 | -2.263524907 | 0.026083571 | -3.515056421 |
| LZTS1         | 0.428899091  | 3.224964508 | 2.263498249  | 0.026085281 | -3.51510863  |
| RP1-59D14.9   | 0.330452266  | 0.205884753 | 2.263324718  | 0.026096415 | -3.515448477 |
| SERPING1      | -0.686200059 | 4.321669514 | -2.263241721 | 0.026101742 | -3.515611013 |
| CCDC173       | 0.202053219  | 0.288247082 | 2.263082471  | 0.026111965 | -3.515922861 |
| NIPBL         | 0.291020704  | 2.959367652 | 2.262615879  | 0.02614194  | -3.516836447 |
| MT-ND4L       | 0.534869365  | 11.11427466 | 2.262380825  | 0.026157051 | -3.517296619 |
| KLRB1         | -0.246538757 | 0.545376816 | -2.262265957 | 0.026164439 | -3.517521482 |
| C2CD2L        | 0.216564651  | 1.65484272  | 2.261811834  | 0.026193664 | -3.518410374 |
| CDK5RAP2      | 0.225182991  | 2.784498456 | 2.261629944  | 0.026205377 | -3.518766358 |
| UBXN7         | 0.252545018  | 2.788982004 | 2.261610572  | 0.026206625 | -3.51880427  |
| SMDT1         | -0.358214456 | 3.737564619 | -2.261546942 | 0.026210724 | -3.518928795 |
| AC005412.1    | 0.207895898  | 0.160361761 | 2.261396846  | 0.026220395 | -3.519222525 |
| RABGAP1       | 0.247206614  | 2.405989393 | 2.261178768  | 0.026234452 | -3.519649263 |
| RAB3IL1       | -0.412046208 | 3.062394393 | -2.261175073 | 0.02623469  | -3.519656493 |
| FERMT1        | 0.394448916  | 1.38903157  | 2.260852081  | 0.026255522 | -3.520288458 |
| ANAPC1        | 0.203748655  | 1.472293941 | 2.260821506  | 0.026257495 | -3.520348279 |
| RNU7-194P     | 0.342197908  | 0.29281089  | 2.260677106  | 0.026266813 | -3.520630781 |
| RN7SL174P     | 0.337776778  | 0.152146432 | 2.260593827  | 0.026272189 | -3.520793701 |

|               |              |             |              |             |              |
|---------------|--------------|-------------|--------------|-------------|--------------|
| RP11-819C21.1 | 0.229925297  | 0.704610944 | 2.259678043  | 0.026331366 | -3.522584913 |
| RNU6-600P     | 0.282659632  | 0.148108879 | 2.259551631  | 0.026339544 | -3.522832116 |
| AC005682.6    | 0.260982821  | 0.808194656 | 2.259266925  | 0.02635797  | -3.523388823 |
| TMEM147       | -0.347433051 | 5.085458358 | -2.259244308 | 0.026359434 | -3.523433047 |
| KIF18B        | 0.32643187   | 3.138309313 | 2.25900164   | 0.026375149 | -3.523907501 |
| AC096582.7    | 0.254044072  | 0.563695815 | 2.258838731  | 0.026385704 | -3.52422599  |
| AP000870.1    | 0.200843044  | 0.219915969 | 2.258629398  | 0.026399272 | -3.524635208 |
| MIR4664       | 0.660532823  | 1.254738838 | 2.258517008  | 0.026406559 | -3.524854901 |
| AC007511.1    | 0.288000605  | 0.103126738 | 2.257911262  | 0.026445864 | -3.526038814 |
| SLC25A14      | -0.250061686 | 1.734565492 | -2.257703508 | 0.026459357 | -3.526444798 |
| RP5-1042I8.7  | -0.300188861 | 1.350582369 | -2.257474528 | 0.026474235 | -3.526892225 |
| TSPAN6        | -0.339822263 | 3.39739585  | -2.257445554 | 0.026476118 | -3.526948836 |
| LSM5          | -0.31053133  | 2.665377382 | -2.257312899 | 0.026484741 | -3.527208023 |
| VTI1BP4       | 0.209605139  | 0.200820808 | 2.257214276  | 0.026491154 | -3.527400707 |
| HPDL          | 0.481469567  | 1.563994331 | 2.257092889  | 0.026499048 | -3.527637855 |
| CTC-461H2.2   | 0.227891701  | 0.144689688 | 2.257017965  | 0.026503922 | -3.527784225 |
| INA           | 0.504118979  | 0.858261853 | 2.256789495  | 0.026518789 | -3.528230536 |
| APAF1         | 0.260818112  | 2.144744586 | 2.256449855  | 0.026540903 | -3.528893941 |
| EIF5A2P1      | 0.203547118  | 0.233697496 | 2.256320585  | 0.026549324 | -3.529146416 |
| HDAC8         | -0.203513973 | 2.085680303 | -2.255936709 | 0.026574346 | -3.529896079 |
| AC091801.1    | 0.205653144  | 0.102788027 | 2.255824525  | 0.026581662 | -3.530115141 |
| ARL6IP6       | 0.337775003  | 2.621725966 | 2.255644423  | 0.026593411 | -3.530466804 |
| CTB-49A3.4    | 0.308898668  | 0.114834834 | 2.25539055   | 0.02660998  | -3.53096247  |
| KB-1090H4.2   | 0.22761527   | 0.097448279 | 2.254941535  | 0.026639308 | -3.531839015 |
| RP11-121L11.3 | 0.206296793  | 0.08364328  | 2.254804741  | 0.026648248 | -3.532106027 |
| AC013470.6    | 0.25233545   | 0.340182299 | 2.254677344  | 0.026656577 | -3.532354684 |
| RP11-386G11.5 | 0.203781786  | 0.71791148  | 2.254232334  | 0.026685687 | -3.533223169 |
| PSORS1C3      | 0.292998342  | 0.407481232 | 2.253630207  | 0.02672512  | -3.534398046 |
| ARMC6         | -0.29162455  | 3.30985877  | -2.253066688 | 0.026762071 | -3.53549734  |
| MIR3672       | 0.247807556  | 0.142614411 | 2.252839357  | 0.02677699  | -3.53594074  |
| DAB1          | 0.284777565  | 0.204725443 | 2.252000155  | 0.026832129 | -3.537577234 |
| RNA5SP339     | 0.220379773  | 0.092061904 | 2.251824931  | 0.026843654 | -3.537918863 |
| RP11-87P13.2  | 0.202828584  | 0.091205912 | 2.251551235  | 0.026861665 | -3.538452434 |

|               |              |             |              |             |              |
|---------------|--------------|-------------|--------------|-------------|--------------|
| MIR520C       | 0.245899986  | 0.100522764 | 2.251358881  | 0.02687433  | -3.538827395 |
| TRANK1        | -0.242459601 | 1.144246186 | -2.25130406  | 0.02687794  | -3.538934253 |
| RP11-20O24.1  | 0.421781658  | 1.37600198  | 2.25127729   | 0.026879703 | -3.538986433 |
| HNRNPA0       | -0.212464184 | 4.558570871 | -2.251268733 | 0.026880267 | -3.539003112 |
| RP11-51J9.4   | 0.203581347  | 0.245377674 | 2.250488925  | 0.026931673 | -3.540522868 |
| CTC-255N20.1  | 0.216328296  | 0.132026302 | 2.250395818  | 0.026937816 | -3.540704292 |
| RP11-90P5.5   | 0.215931806  | 0.236512426 | 2.250235311  | 0.02694841  | -3.541017034 |
| CLIC3         | 0.641864332  | 2.267700679 | 2.250066324  | 0.026959567 | -3.541346275 |
| NR1H3         | -0.254674788 | 1.921300304 | -2.24972614  | 0.02698204  | -3.542009    |
| AC064853.3    | 0.247237291  | 0.09982105  | 2.249405806  | 0.027003217 | -3.542632975 |
| RP11-459K23.2 | 0.264826248  | 0.091881661 | 2.24929421   | 0.027010597 | -3.542850332 |
| GS1-421I3.2   | 0.232552238  | 0.112211747 | 2.249117965  | 0.027022258 | -3.543193589 |
| SFMBT2        | -0.25945805  | 0.913415943 | -2.249026669 | 0.027028299 | -3.543371389 |
| BCAS2         | -0.297197337 | 5.049661419 | -2.248497853 | 0.027063319 | -3.544401136 |
| RPL35AP4      | 0.52924108   | 1.091713565 | 2.248440446  | 0.027067123 | -3.544512911 |
| RP11-73E17.3  | 0.260851761  | 0.222451448 | 2.248426545  | 0.027068044 | -3.544539976 |
| RP11-864N7.1  | 0.236877173  | 0.103279166 | 2.247995921  | 0.027096595 | -3.545378337 |
| SIRT3         | -0.21096392  | 1.937349214 | -2.247785087 | 0.027110583 | -3.54578875  |
| ZW10          | 0.315613971  | 3.175066948 | 2.247732832  | 0.027114051 | -3.545890463 |
| RPF2P1        | 0.247678109  | 0.312926951 | 2.247386614  | 0.027137037 | -3.546564326 |
| POU5F1        | 0.228055104  | 0.568737244 | 2.247187995  | 0.027150232 | -3.546950869 |
| MIR548AY      | 0.285664087  | 0.18949339  | 2.246900169  | 0.027169363 | -3.547510968 |
| UQCRC1        | -0.272955618 | 5.47888152  | -2.246786205 | 0.027176941 | -3.54773272  |
| SQRDL         | -0.433452212 | 2.15014417  | -2.246754437 | 0.027179054 | -3.547794533 |
| PARD6G-AS1    | 0.281506866  | 0.697360415 | 2.246725434  | 0.027180983 | -3.547850964 |
| RP3-477M7.6   | 0.226033815  | 0.263418427 | 2.246573636  | 0.027191081 | -3.548146313 |
| AC009022.1    | 0.234267502  | 0.449558989 | 2.246570447  | 0.027191293 | -3.548152516 |
| VPS25         | -0.290637165 | 4.377951327 | -2.246049337 | 0.027225984 | -3.549166285 |
| ADAMTS10      | 0.531289366  | 3.304674641 | 2.245948252  | 0.027232718 | -3.549362913 |
| NUDT12        | -0.231754965 | 1.086483888 | -2.245889436 | 0.027236637 | -3.549477317 |
| TNRC6C-AS1    | -0.200496033 | 0.529987103 | -2.245737558 | 0.027246759 | -3.549772723 |
| DCTD          | -0.257508805 | 4.673442867 | -2.245605531 | 0.02725556  | -3.550029504 |
| DARS          | 0.251793536  | 4.368378375 | 2.245183686  | 0.027283699 | -3.550849869 |

|               |              |             |              |             |              |
|---------------|--------------|-------------|--------------|-------------|--------------|
| CTD-3001H11.1 | 0.210427913  | 0.300031274 | 2.245148624  | 0.027286038 | -3.550918047 |
| AC020934.1    | 0.206171578  | 0.150570308 | 2.244303973  | 0.02734246  | -3.552560213 |
| RP11-295P9.12 | -0.219865849 | 0.551648795 | -2.243965153 | 0.027365122 | -3.553218793 |
| RN7SL336P     | 0.302053388  | 0.545557435 | 2.24392218   | 0.027367997 | -3.553302315 |
| RFPL4AP7      | 0.254308946  | 0.093386894 | 2.243808086  | 0.027375632 | -3.553524061 |
| MALSU1        | -0.265866837 | 2.575260364 | -2.243577488 | 0.02739107  | -3.553972208 |
| RP11-29O13.1  | 0.237935961  | 0.140396245 | 2.243575069  | 0.027391232 | -3.553976907 |
| HTRA1         | -0.682251103 | 6.641261472 | -2.242928619 | 0.027434551 | -3.555233006 |
| PTPN3         | 0.363799526  | 1.704345688 | 2.242916499  | 0.027435364 | -3.555256554 |
| IGHA1         | -1.122091004 | 2.037983538 | -2.242743929 | 0.027446939 | -3.555591814 |
| AP000648.5    | 0.210349534  | 0.878083803 | 2.242023317  | 0.027495317 | -3.556991536 |
| DOCK7         | 0.248292559  | 2.446857341 | 2.241698555  | 0.027517145 | -3.557622226 |
| HIRA          | -0.277171573 | 2.528113626 | -2.24169835  | 0.027517158 | -3.557622625 |
| PAK2          | 0.243218751  | 4.012134233 | 2.241191526  | 0.027551253 | -3.558606721 |
| FERMT3        | -0.557953328 | 3.311529178 | -2.24068064  | 0.027585658 | -3.559598506 |
| AC009961.5    | 0.323331273  | 0.308957496 | 2.240638348  | 0.027588508 | -3.559680598 |
| HSPE1P8       | 0.27574379   | 0.483150379 | 2.240537922  | 0.027595276 | -3.559875529 |
| ADNP2         | 0.290154685  | 2.505575192 | 2.240492045  | 0.027598368 | -3.559964575 |
| AES           | -0.354588213 | 5.23145463  | -2.239696887 | 0.027652014 | -3.561507708 |
| RP11-19J3.5   | 0.213720871  | 0.278901952 | 2.23924299   | 0.027682677 | -3.562388353 |
| MCM3AP        | 0.286888853  | 3.285885898 | 2.239216244  | 0.027684485 | -3.56244024  |
| CTD-3020H12.4 | 0.497907844  | 0.500760053 | 2.238812926  | 0.027711758 | -3.56322261  |
| GADD45G       | 0.461938483  | 1.922090263 | 2.238657681  | 0.027722263 | -3.563523728 |
| FAM122B       | 0.254446657  | 2.607200153 | 2.238302256  | 0.027746325 | -3.56421305  |
| FAM107B       | -0.290136483 | 2.326519542 | -2.237971949 | 0.027768703 | -3.564853569 |
| CH17-431G21.1 | 0.208918298  | 0.749342379 | 2.237951454  | 0.027770092 | -3.56489331  |
| COX6CP10      | 0.305864893  | 0.320879296 | 2.23739169   | 0.027808053 | -3.565978587 |
| MIR550A3      | 0.206522277  | 0.16123674  | 2.237106708  | 0.027827397 | -3.566531023 |
| KXD1          | -0.245375592 | 3.944421675 | -2.237104613 | 0.027827539 | -3.566535082 |
| RP11-88E10.5  | 0.286534782  | 0.476141293 | 2.236603994  | 0.027861549 | -3.567505376 |
| AC104842.1    | 0.209961373  | 0.073461237 | 2.236583593  | 0.027862936 | -3.567544914 |
| ZNF679        | 0.204885882  | 0.173570258 | 2.236219148  | 0.027887718 | -3.568251149 |
| LINC00618     | 0.276166614  | 0.436978003 | 2.235986122  | 0.027903574 | -3.568702665 |

|                  |              |             |              |             |              |
|------------------|--------------|-------------|--------------|-------------|--------------|
| ELK4             | 0.245306279  | 2.475355254 | 2.235923805  | 0.027907816 | -3.568823404 |
| USP32            | 0.238822533  | 2.359503935 | 2.235858419  | 0.027912267 | -3.568950085 |
| AD000092.3       | 0.553871123  | 2.556451468 | 2.235676581  | 0.027924649 | -3.569302371 |
| SMARCB1          | -0.299326214 | 5.360416359 | -2.235639476 | 0.027927176 | -3.569374253 |
| SIL1             | -0.332855768 | 4.007570483 | -2.235432548 | 0.027941274 | -3.56977511  |
| SGSH             | -0.308827764 | 2.603018962 | -2.235307702 | 0.027949782 | -3.570016944 |
| SHANK1           | 0.445240704  | 1.440696608 | 2.235299192  | 0.027950362 | -3.570033429 |
| RNA5SP71         | 0.389995052  | 0.454039062 | 2.235218332  | 0.027955874 | -3.570190051 |
| NUP205           | 0.271068595  | 3.318416264 | 2.234955075  | 0.027973827 | -3.570699937 |
| KIAA0907         | 0.310363233  | 3.056927901 | 2.234448522  | 0.028008398 | -3.571680899 |
| MCM4             | 0.368134121  | 4.718825302 | 2.233364377  | 0.028082516 | -3.573779736 |
| RNU6-898P        | 0.304040808  | 0.145494302 | 2.232998158  | 0.028107591 | -3.574488509 |
| RP11-72I2.1      | 0.302983848  | 0.13929849  | 2.232988012  | 0.028108286 | -3.574508144 |
| RP11-203F10.1    | 0.275314722  | 0.121249116 | 2.232831714  | 0.028118994 | -3.574810607 |
| RP11-1018N14.5   | 0.203919634  | 0.120292078 | 2.232317166  | 0.028154272 | -3.575806215 |
| AC022182.1       | 0.262926766  | 0.258831174 | 2.232212751  | 0.028161435 | -3.576008225 |
| EGFL8            | 0.22755832   | 0.735973542 | 2.232197615  | 0.028162474 | -3.576037509 |
| RNU2-50P         | 0.294884157  | 0.192693108 | 2.232150187  | 0.028165728 | -3.576129263 |
| ACO1             | 0.243322177  | 2.849087557 | 2.231762126  | 0.028192368 | -3.576879945 |
| RP6-24A23.8      | 0.384927732  | 0.196054005 | 2.231562126  | 0.028206107 | -3.577266789 |
| RP5-1009N12.1    | 0.226611693  | 0.499819389 | 2.231164239  | 0.028233457 | -3.578036301 |
| MAP4K1           | -0.327380812 | 0.876737466 | -2.230923158 | 0.028250039 | -3.57850249  |
| AC087294.2       | 0.207867823  | 0.449992472 | 2.230742822  | 0.028262449 | -3.578851186 |
| XXbac-B476C20.13 | 0.20915293   | 0.188056922 | 2.23071439   | 0.028264406 | -3.578906159 |
| RP11-973H7.4     | -0.395568486 | 0.67257243  | -2.230308748 | 0.02829234  | -3.579690403 |
| RNU6-1297P       | 0.378959966  | 0.539781089 | 2.230235859  | 0.028297362 | -3.579831309 |
| RP5-1065J22.4    | 0.208620077  | 0.645822793 | 2.229625236  | 0.028339463 | -3.581011581 |
| RP11-333A23.2    | 0.218327677  | 0.20416521  | 2.229622273  | 0.028339667 | -3.581017308 |
| RP11-396N11.1    | 0.20684046   | 0.08367383  | 2.229587259  | 0.028342083 | -3.581084979 |
| RP1-281H8.3      | 0.202670467  | 0.311182613 | 2.229499052  | 0.02834817  | -3.581255447 |
| RP11-304C16.3    | 0.292025623  | 0.094778434 | 2.229442271  | 0.028352089 | -3.581365178 |
| ATP5J2P6         | 0.221445946  | 0.155738274 | 2.229024137  | 0.028380961 | -3.582173166 |
| LINC01169        | 0.225113645  | 0.221547145 | 2.228612282  | 0.028409425 | -3.582968888 |

|               |              |             |              |             |              |
|---------------|--------------|-------------|--------------|-------------|--------------|
| MIR4514       | 0.273920171  | 0.251881653 | 2.228414003  | 0.028423137 | -3.583351927 |
| TAF13P2       | 0.229494045  | 0.166441136 | 2.228385149  | 0.028425133 | -3.583407665 |
| CTC-470C15.1  | 0.353119867  | 0.367653893 | 2.228311947  | 0.028430197 | -3.583549068 |
| HADHA         | -0.224276031 | 5.521739455 | -2.228017919 | 0.028450547 | -3.584116998 |
| RP11-44D19.1  | 0.204420453  | 0.093171172 | 2.227834618  | 0.028463239 | -3.584471018 |
| MAP3K15       | 0.206010041  | 0.209761182 | 2.227828147  | 0.028463687 | -3.584483516 |
| RNY1P14       | 0.436539181  | 0.321711468 | 2.227540406  | 0.028483622 | -3.585039196 |
| RNU6-1327P    | 0.270504291  | 0.179151122 | 2.227344287  | 0.028497215 | -3.5854179   |
| LINC00903     | 0.224422995  | 0.086772454 | 2.226771961  | 0.028536919 | -3.586522889 |
| SH3BP1        | -0.361207604 | 2.119247078 | -2.226639377 | 0.028546123 | -3.586778835 |
| NCR1          | 0.23297226   | 0.277418045 | 2.226537824  | 0.028553175 | -3.586974867 |
| IMPDH1        | 0.338052849  | 4.613038051 | 2.226354418  | 0.028565915 | -3.587328884 |
| INIP          | 0.233362803  | 3.317418483 | 2.226207855  | 0.028576099 | -3.587611765 |
| RPS27L        | -0.263013116 | 2.308761578 | -2.226183355 | 0.028577802 | -3.587659051 |
| RNU6-338P     | 0.308862017  | 0.147905304 | 2.225700817  | 0.028611356 | -3.588590275 |
| RP5-1172N10.2 | 0.220341703  | 0.208079931 | 2.225103429  | 0.028652944 | -3.589742896 |
| POLR2L        | -0.404741073 | 6.063144619 | -2.225030242 | 0.028658043 | -3.589884088 |
| RP11-88H1.1   | 0.21077531   | 0.077651525 | 2.225024175  | 0.028658465 | -3.589895791 |
| STT3A         | 0.356299444  | 5.146453606 | 2.224987531  | 0.028661019 | -3.589966482 |
| CTD-2571L23.8 | 0.312827338  | 0.699271484 | 2.224861176  | 0.028669824 | -3.59021023  |
| SERF2         | -0.367999367 | 5.813298504 | -2.224627797 | 0.028686094 | -3.590660401 |
| SPDL1         | 0.32542468   | 2.532378188 | 2.224482353  | 0.028696237 | -3.590940931 |
| AC067805.1    | 0.350100502  | 0.246436692 | 2.224363432  | 0.028704534 | -3.591170293 |
| RNU6-288P     | 0.33810143   | 0.690077808 | 2.224133344  | 0.028720591 | -3.591614029 |
| ARMC4         | 0.297645924  | 0.764108875 | 2.224034526  | 0.02872749  | -3.591804592 |
| TMSB4XP8      | -0.686569705 | 7.449611641 | -2.222892594 | 0.028807316 | -3.59400618  |
| NUS1P1        | 0.332999908  | 1.72725665  | 2.222772112  | 0.02881575  | -3.594238405 |
| WDR35         | 0.222255998  | 1.626688279 | 2.222024589  | 0.028868124 | -3.595678984 |
| GHR           | 0.43920307   | 2.340101942 | 2.221929771  | 0.028874773 | -3.59586168  |
| MSL3P1        | 0.302645436  | 0.696315977 | 2.221851777  | 0.028880243 | -3.596011954 |
| C3            | -0.614250363 | 1.543518363 | -2.221810277 | 0.028883154 | -3.596091912 |
| IGSF21        | -0.50095242  | 1.902209741 | -2.221773676 | 0.028885722 | -3.596162431 |
| RPL37P25      | 0.299965611  | 0.182050277 | 2.221757511  | 0.028886856 | -3.596193576 |

|               |              |             |              |             |              |
|---------------|--------------|-------------|--------------|-------------|--------------|
| RP11-164H5.1  | 0.258292667  | 0.338813842 | 2.22159111   | 0.028898533 | -3.59651416  |
| RP4-756H11.3  | 0.387534143  | 1.85026785  | 2.221093512  | 0.028933475 | -3.597472697 |
| AP000936.5    | 0.210318975  | 0.128717756 | 2.220786304  | 0.028955066 | -3.598064384 |
| CTC-661I16.1  | 0.238887966  | 0.125298509 | 2.220600997  | 0.028968096 | -3.598421256 |
| RP11-30K9.4   | 0.224493011  | 0.267494936 | 2.220538058  | 0.028972523 | -3.598542459 |
| RAPGEF2       | 0.279556309  | 2.281501966 | 2.220387078  | 0.028983145 | -3.598833193 |
| PIEZO2        | 0.46559003   | 1.549898703 | 2.220234643  | 0.028993872 | -3.599126712 |
| EPG5          | 0.207947954  | 1.501315747 | 2.219838739  | 0.02902175  | -3.599888957 |
| AC005783.1    | 0.221877751  | 0.29452371  | 2.219671973  | 0.0290335   | -3.600210001 |
| AC012363.2    | 0.27481603   | 0.355106245 | 2.219435891  | 0.029050141 | -3.600664448 |
| ATXN2L        | 0.265481462  | 4.652340344 | 2.219263658  | 0.029062287 | -3.600995962 |
| AC116609.1    | 0.286671445  | 0.118976234 | 2.219075796  | 0.02907554  | -3.601357534 |
| AC027319.3    | 0.311546157  | 0.340639399 | 2.218882665  | 0.02908917  | -3.601729218 |
| ZNF800        | 0.212546537  | 2.068226664 | 2.218647944  | 0.029105743 | -3.602180905 |
| RNU6-1121P    | 0.237150398  | 0.206039455 | 2.218162182  | 0.029140067 | -3.603115547 |
| SLC2A13       | 0.217756659  | 1.343232514 | 2.217762189  | 0.029168357 | -3.603885029 |
| CAPZA1        | -0.269185801 | 5.459103978 | -2.217147234 | 0.029211898 | -3.605067802 |
| RPL12P37      | 0.331008957  | 0.408132283 | 2.217050089  | 0.029218782 | -3.60525462  |
| RUSC2         | 0.307547107  | 3.044058211 | 2.216939319  | 0.029226632 | -3.605467629 |
| ANXA10        | 0.202124487  | 0.175616099 | 2.216710851  | 0.02924283  | -3.605906944 |
| RP11-381N20.1 | 0.257649772  | 0.134053247 | 2.216543624  | 0.029254691 | -3.606228473 |
| RP11-16B13.1  | 0.210264877  | 0.185419144 | 2.216499561  | 0.029257817 | -3.60631319  |
| CXCL11        | -0.531527578 | 0.927713814 | -2.216207006 | 0.02927858  | -3.606875629 |
| RP11-363L24.3 | 0.272196838  | 0.161914727 | 2.215883304  | 0.029301568 | -3.607497872 |
| NUP155        | 0.292446464  | 3.037534413 | 2.215840936  | 0.029304578 | -3.607579309 |
| AC013660.1    | 0.208938136  | 0.070003327 | 2.215786     | 0.029308481 | -3.6076849   |
| RP1-167A14.2  | 0.28710203   | 0.632973475 | 2.215463899  | 0.029331375 | -3.608303961 |
| SIK3          | 0.256230239  | 2.504164162 | 2.214387164  | 0.029408022 | -3.610372813 |
| RNY4P25       | 0.417801862  | 0.696191804 | 2.214100778  | 0.029428438 | -3.610922927 |
| ASCL2         | -0.26825669  | 0.619773166 | -2.213905373 | 0.029442375 | -3.611298242 |
| FAM102A       | 0.33366592   | 3.857022153 | 2.213769839  | 0.029452045 | -3.611558546 |
| SYNPR-AS1     | 0.204012959  | 0.182175221 | 2.213761358  | 0.02945265  | -3.611574835 |
| DUSP19        | 0.261698629  | 1.360669399 | 2.213459812  | 0.029474176 | -3.612153923 |



|               |              |             |              |             |              |
|---------------|--------------|-------------|--------------|-------------|--------------|
| RP11-14K3.4   | 0.255845194  | 0.185446793 | 2.213294151  | 0.029486007 | -3.612472031 |
| GBP2          | -0.498911215 | 2.551265101 | -2.212977532 | 0.029508631 | -3.613079952 |
| MIR8059       | 0.339884154  | 0.153934418 | 2.212943581  | 0.029511058 | -3.613145133 |
| KB-173C10.1   | 0.204097504  | 0.130791963 | 2.212819289  | 0.029519944 | -3.613383755 |
| DCAF6         | 0.270604189  | 3.262163509 | 2.212663585  | 0.029531079 | -3.613682665 |
| LDHAP5        | 0.334160132  | 1.317480972 | 2.212561745  | 0.029538364 | -3.613878161 |
| ATXN2         | 0.259267637  | 2.421475988 | 2.212457189  | 0.029545845 | -3.614078862 |
| AK3           | 0.338516009  | 3.433980904 | 2.212448399  | 0.029546474 | -3.614095736 |
| AC016995.3    | 0.200317415  | 0.145753848 | 2.212291957  | 0.029557671 | -3.614396019 |
| RNU2-39P      | 0.278655444  | 0.126318    | 2.212094589  | 0.029571802 | -3.614774829 |
| RP11-456D7.1  | 0.201325381  | 0.167944581 | 2.210885534  | 0.029658497 | -3.617094738 |
| PLEKHH2       | 0.257241159  | 0.946296976 | 2.210816391  | 0.029663461 | -3.617227374 |
| UBE4A         | 0.336469846  | 2.790357879 | 2.210809511  | 0.029663955 | -3.61724057  |
| ABHD11        | -0.288632092 | 2.544412454 | -2.210657219 | 0.029674893 | -3.617532697 |
| RP11-459O1.2  | 0.261030787  | 0.165566343 | 2.210637874  | 0.029676283 | -3.617569804 |
| C14orf132     | 0.500548458  | 3.296632555 | 2.210632922  | 0.029676638 | -3.617579302 |
| RNASE2        | -0.439195556 | 0.797278391 | -2.210574563 | 0.029680831 | -3.61769124  |
| PAQR3         | 0.216682607  | 1.266679045 | 2.210167016  | 0.029710123 | -3.618472882 |
| SETD8         | 0.256300559  | 3.347294299 | 2.209863495  | 0.029731955 | -3.619054927 |
| IGKC          | -1.114003833 | 1.812079037 | -2.209742603 | 0.029740655 | -3.619286737 |
| RP11-166O4.6  | 0.388795127  | 0.889882984 | 2.208931503  | 0.02979908  | -3.620841717 |
| IL17RD        | -0.324746161 | 0.671717731 | -2.208761885 | 0.029811311 | -3.621166832 |
| RP11-225B17.2 | -0.341885972 | 2.017239034 | -2.208717695 | 0.029814498 | -3.62125153  |
| SFXN1         | 0.280766669  | 2.798493868 | 2.208551251  | 0.029826505 | -3.621570534 |
| RP11-760D2.7  | 0.209805875  | 0.517539958 | 2.208481213  | 0.029831559 | -3.621704762 |
| RABL3         | 0.222646565  | 2.090471154 | 2.208395452  | 0.029837748 | -3.621869117 |
| RP11-390F4.10 | 0.309249096  | 0.264160022 | 2.208181645  | 0.029853183 | -3.622278841 |
| ARPC1B        | -0.337802158 | 5.210956954 | -2.208117055 | 0.029857848 | -3.622402609 |
| AC025171.1    | 0.2322044    | 1.071319652 | 2.208062054  | 0.02986182  | -3.622508    |
| IGBP1-AS2     | 0.20036092   | 0.318319797 | 2.207697344  | 0.029888172 | -3.623206787 |
| AC005071.4    | 0.250549283  | 0.516286632 | 2.207449073  | 0.029906122 | -3.623682417 |
| CA11          | -0.344658922 | 1.143620994 | -2.206993086 | 0.029939115 | -3.624555863 |
| AC009963.4    | 0.232375769  | 0.106308415 | 2.206686762  | 0.029961297 | -3.625142538 |

|               |              |             |              |             |              |
|---------------|--------------|-------------|--------------|-------------|--------------|
| RP11-848P1.4  | 0.202212433  | 0.437697736 | 2.206608972  | 0.029966933 | -3.62529151  |
| RP1-55C23.7   | 0.210295844  | 0.08542115  | 2.206527285  | 0.029972851 | -3.625447941 |
| AC025918.1    | 0.246353914  | 0.321969676 | 2.205992234  | 0.030011644 | -3.626472438 |
| LPCAT4        | -0.267213875 | 1.958440785 | -2.205867775 | 0.030020674 | -3.626710715 |
| AC111200.2    | 0.227118718  | 0.155407649 | 2.205597112  | 0.03004032  | -3.627228862 |
| FBXO45        | 0.228199012  | 2.40210092  | 2.205385562  | 0.030055682 | -3.627633805 |
| PRDM14        | 0.233314086  | 0.177652923 | 2.205315849  | 0.030060747 | -3.627767241 |
| RP11-266N13.2 | 0.201629773  | 0.177468726 | 2.205042722  | 0.030080594 | -3.628289988 |
| RP11-113K21.6 | 0.261850773  | 0.675676982 | 2.205031882  | 0.030081382 | -3.628310733 |
| GTF2H5        | -0.23056404  | 2.132070746 | -2.204679832 | 0.030106982 | -3.628984446 |
| AC104304.1    | 0.425294267  | 0.352922379 | 2.204567499  | 0.030115155 | -3.629199398 |
| AC026992.1    | 0.276984788  | 0.173500165 | 2.204400733  | 0.030127292 | -3.629518487 |
| RP11-977G19.5 | -0.465378854 | 2.166816866 | -2.203691953 | 0.030178921 | -3.63087443  |
| CTD-3025N20.3 | -0.312971131 | 1.26755835  | -2.203058062 | 0.030225161 | -3.632086778 |
| ABCD1P5       | 0.246336866  | 0.122008499 | 2.20276028   | 0.030246904 | -3.632656195 |
| RP1-319M7.2   | 0.207161759  | 0.150505388 | 2.202271153  | 0.030282648 | -3.633591351 |
| GPHA2         | 0.253062982  | 0.253753586 | 2.202006516  | 0.030302003 | -3.634097231 |
| FAM120A       | 0.209463513  | 4.707980913 | 2.201804066  | 0.030316817 | -3.634484199 |
| MIR6085       | 0.322187978  | 0.189132986 | 2.201512174  | 0.030338186 | -3.635042071 |
| RHOQP3        | 0.22233753   | 0.7071551   | 2.201120839  | 0.030366857 | -3.635789901 |
| RNU6-225P     | 0.358388657  | 0.201518626 | 2.20107141   | 0.03037048  | -3.63588435  |
| CUL5          | 0.310773768  | 2.814158786 | 2.20089468   | 0.030383437 | -3.63622203  |
| TRAPPC2L      | -0.355387018 | 2.89661408  | -2.20087217  | 0.030385087 | -3.636265038 |
| ABCC5-AS1     | 0.244676785  | 0.336966729 | 2.200647759  | 0.030401548 | -3.636693785 |
| FUT4          | 0.236397361  | 1.645289588 | 2.20046914   | 0.030414655 | -3.637035015 |
| UBE2B         | -0.202725517 | 3.621370519 | -2.200168504 | 0.030436727 | -3.637609292 |
| LILRA6        | -0.204708681 | 0.584433964 | -2.200143557 | 0.030438559 | -3.637656943 |
| PRRC2A        | 0.350960666  | 5.206396065 | 2.200111594  | 0.030440907 | -3.637717994 |
| PRPF3         | 0.364522522  | 3.579443989 | 2.200064932  | 0.030444334 | -3.637807119 |
| AL133493.2    | 0.222273445  | 0.370553194 | 2.199880359  | 0.030457895 | -3.638159642 |
| BCKDHA        | 0.304851189  | 1.589494027 | 2.19983169   | 0.030461472 | -3.638252592 |
| AP001258.5    | 0.201633584  | 0.19233618  | 2.199566638  | 0.030480957 | -3.638758769 |
| SLC25A40      | 0.261654518  | 2.035267186 | 2.199270915  | 0.030502709 | -3.639323454 |

|               |              |             |              |             |              |
|---------------|--------------|-------------|--------------|-------------|--------------|
| MIR4419A      | 0.285097755  | 0.314484043 | 2.1992577    | 0.030503681 | -3.639348687 |
| RP11-539L10.3 | -0.359412273 | 1.541712742 | -2.199245486 | 0.03050458  | -3.63937201  |
| RPL26P3       | 0.223111626  | 0.163331602 | 2.199067385  | 0.030517688 | -3.639712058 |
| SLC35E3       | 0.30223066   | 1.189968869 | 2.197948653  | 0.030600137 | -3.641847507 |
| AKAP11        | 0.262108335  | 2.132479458 | 2.197775237  | 0.030612935 | -3.642178439 |
| CSF2RA        | -0.363780457 | 1.272645791 | -2.197395951 | 0.030640942 | -3.642902156 |
| RNU7-24P      | 0.242562973  | 0.089114708 | 2.19726319   | 0.030650751 | -3.643155451 |
| CTD-3220F14.2 | 0.244460102  | 0.650382143 | 2.197007831  | 0.030669625 | -3.643642613 |
| CYFIP1        | -0.220236405 | 3.496556777 | -2.196530834 | 0.030704907 | -3.644552473 |
| ITPR2         | 0.294876649  | 2.087114605 | 2.196471405  | 0.030709306 | -3.64466582  |
| RP11-196G11.4 | 0.247594086  | 0.724298043 | 2.196340679  | 0.030718983 | -3.644915139 |
| MIR762HG      | -0.285772788 | 0.918186966 | -2.196338268 | 0.030719161 | -3.644919738 |
| RNU6-1237P    | 0.41499219   | 0.564834022 | 2.196018274  | 0.03074286  | -3.645529973 |
| CCDC39        | 0.273511621  | 0.872848853 | 2.195657451  | 0.030769602 | -3.646217976 |
| CTA-929C8.5   | 0.278201238  | 0.094899462 | 2.195503194  | 0.030781041 | -3.646512075 |
| RP5-1097P24.1 | 0.287175672  | 0.091371262 | 2.195104179  | 0.030810647 | -3.647272736 |
| MIR181B2      | 0.286772222  | 0.308737536 | 2.194850611  | 0.030829474 | -3.647756062 |
| BACE1         | 0.352669121  | 3.770087124 | 2.194788941  | 0.030834054 | -3.647873603 |
| CFAP97        | 0.296814414  | 2.688683767 | 2.194745126  | 0.030837309 | -3.647957112 |
| SCAPER        | 0.202246866  | 1.037861301 | 2.194723605  | 0.030838908 | -3.64799813  |
| CEP170B       | 0.376786021  | 3.156559214 | 2.194596162  | 0.030848377 | -3.648241017 |
| METTL16       | 0.315525733  | 2.64344307  | 2.194532663  | 0.030853095 | -3.648362033 |
| AC069082.1    | 0.226647188  | 0.066963942 | 2.193191842  | 0.030952883 | -3.650916616 |
| COX7A2L       | -0.241437755 | 3.945605595 | -2.193080543 | 0.030961179 | -3.651128605 |
| HLA-C         | -0.478136049 | 7.546278821 | -2.192747246 | 0.030986033 | -3.651763374 |
| AL162430.1    | 0.25930445   | 0.103975279 | 2.192648931  | 0.030993368 | -3.651950599 |
| CTB-4116.2    | -0.203437025 | 0.484503407 | -2.192642559 | 0.030993843 | -3.651962732 |
| RP11-25115.1  | 0.38448492   | 1.224601243 | 2.19254682   | 0.031000987 | -3.652145046 |
| RP11-6013.4   | 0.236454581  | 0.159565477 | 2.192476867  | 0.031006208 | -3.652278249 |
| RP5-1116H23.5 | 0.20764913   | 0.27407293  | 2.1923454    | 0.031016022 | -3.65252858  |
| STAC3         | -0.643786334 | 1.840615487 | -2.192168722 | 0.031029216 | -3.652864974 |
| AC023818.1    | 0.296794131  | 0.119157626 | 2.192129249  | 0.031032164 | -3.652940128 |
| RNA5SP465     | 0.393642303  | 0.433082533 | 2.192107712  | 0.031033773 | -3.652981133 |

|               |              |             |              |             |              |
|---------------|--------------|-------------|--------------|-------------|--------------|
| RP11-785H20.1 | 0.239288373  | 0.114771265 | 2.191914528  | 0.031048206 | -3.653348919 |
| CEP152        | 0.236259967  | 1.271734993 | 2.191764819  | 0.031059395 | -3.653633918 |
| XRN1          | 0.285536043  | 1.917812426 | 2.191141372  | 0.031106029 | -3.654820577 |
| AC093166.4    | 0.265104741  | 0.241192256 | 2.191018427  | 0.031115233 | -3.655054554 |
| RP11-368I23.2 | 0.21142526   | 0.158880256 | 2.190941984  | 0.031120957 | -3.655200027 |
| IGHVIII-67-2  | 0.268972753  | 0.105763801 | 2.190886038  | 0.031125146 | -3.65530649  |
| IFNAR1        | 0.264961062  | 3.976411401 | 2.190735824  | 0.031136397 | -3.655592331 |
| HEATR5B       | 0.21293236   | 2.135428895 | 2.190565952  | 0.031149125 | -3.655915557 |
| SDCCAG3P2     | 0.51396012   | 1.075475269 | 2.190456817  | 0.031157305 | -3.656123205 |
| CCDC163P      | 0.218652644  | 1.165276888 | 2.190311709  | 0.031168183 | -3.656399283 |
| CTD-2538G9.3  | 0.259960969  | 0.130781976 | 2.19021704   | 0.031175282 | -3.656579387 |
| RNU6-453P     | 0.328641969  | 0.121862484 | 2.189722789  | 0.031212368 | -3.657519574 |
| PCOLCE        | -0.468696522 | 7.674801728 | -2.18949958  | 0.031229129 | -3.657944111 |
| RNU7-110P     | 0.222600891  | 0.21540649  | 2.189337266  | 0.031241322 | -3.658252803 |
| TRPV4         | 0.479555661  | 2.480686893 | 2.189160436  | 0.03125461  | -3.658589078 |
| RN7SL735P     | 0.25035988   | 0.266518811 | 2.188880871  | 0.031275629 | -3.659120675 |
| AC092332.1    | 0.250023808  | 0.096242601 | 2.188094647  | 0.031334806 | -3.660615368 |
| C1orf56       | 0.330488227  | 2.425498302 | 2.188034013  | 0.031339374 | -3.66073062  |
| SCARA5        | 0.681203968  | 1.71489784  | 2.187986155  | 0.03134298  | -3.660821585 |
| KLHL8         | 0.276048621  | 2.551058679 | 2.187952474  | 0.031345518 | -3.660885602 |
| SLC31A1       | 0.24984536   | 4.09599059  | 2.187740505  | 0.031361494 | -3.661288474 |
| RN7SL549P     | 0.278448765  | 0.105715197 | 2.187597668  | 0.031372263 | -3.661559931 |
| AC020931.1    | -0.214960088 | 0.285460971 | -2.18757182  | 0.031374212 | -3.661609052 |
| MLLT10P2      | 0.231359403  | 0.092395664 | 2.187107989  | 0.031409208 | -3.662490433 |
| RP11-328P23.2 | 0.262955084  | 0.496170443 | 2.186719031  | 0.031438581 | -3.663229413 |
| SLC18B1       | -0.341648586 | 2.631888076 | -2.186705335 | 0.031439615 | -3.663255431 |
| COG5          | 0.217791612  | 2.167717533 | 2.186064789  | 0.031488041 | -3.664472138 |
| NOS1          | 0.270224177  | 0.196755052 | 2.186063889  | 0.031488109 | -3.664473848 |
| RP11-192C21.3 | 0.398623097  | 0.304513977 | 2.185631993  | 0.031520797 | -3.665294048 |
| POM121        | 0.289568616  | 2.471057544 | 2.185444803  | 0.031534974 | -3.665649492 |
| RP1-8B22.2    | 0.219762676  | 0.14147606  | 2.184923759  | 0.031574464 | -3.666638724 |
| ARHGEF11      | 0.292237949  | 3.476022145 | 2.184797437  | 0.031584045 | -3.666878522 |
| HSBP1L1       | 0.322416993  | 1.646184401 | 2.184553673  | 0.03160254  | -3.667341227 |

|               |              |             |              |             |              |
|---------------|--------------|-------------|--------------|-------------|--------------|
| NEU4          | 0.280557466  | 0.217873579 | 2.184152391  | 0.031633006 | -3.66810283  |
| DENND4C       | 0.234433989  | 1.919425339 | 2.1833652    | 0.031692847 | -3.669596494 |
| ERMN          | 0.458128992  | 1.215477315 | 2.183358672  | 0.031693343 | -3.669608878 |
| DDAH2         | -0.357289672 | 4.193163912 | -2.183124767 | 0.031711144 | -3.67005261  |
| FTLP2         | -0.390413813 | 2.651109052 | -2.182922958 | 0.031726508 | -3.670435422 |
| RP11-794C22.2 | 0.213302927  | 0.196013453 | 2.18283959   | 0.031732857 | -3.670593554 |
| RP13-324D24.1 | 0.2354399    | 0.111536586 | 2.182766754  | 0.031738405 | -3.670731704 |
| CWC25         | -0.204824993 | 2.580580283 | -2.182297616 | 0.03177416  | -3.67162143  |
| C11orf97      | 0.2669972    | 0.101827608 | 2.182184701  | 0.03178277  | -3.671835551 |
| LINC01517     | 0.352517644  | 0.314544223 | 2.181979943  | 0.03179839  | -3.672223808 |
| RNU6-212P     | 0.433430429  | 0.525008207 | 2.181803568  | 0.031811851 | -3.672558219 |
| FAM20B        | 0.330713112  | 3.678804122 | 2.181598829  | 0.031827481 | -3.672946378 |
| ARHGAP30      | -0.38711818  | 1.962592477 | -2.181501856 | 0.031834887 | -3.673130215 |
| TMEM238       | 0.435288294  | 1.059373456 | 2.18135576   | 0.031846047 | -3.673407166 |
| SLC38A6       | -0.234285835 | 1.536821533 | -2.181126074 | 0.0318636   | -3.67384254  |
| FEM1A         | 0.249799343  | 0.977738541 | 2.180939666  | 0.031877851 | -3.67419585  |
| C2CD4D        | 0.38990829   | 0.669377841 | 2.180894517  | 0.031881304 | -3.674281421 |
| LINC01036     | 0.27318636   | 0.347139886 | 2.180815644  | 0.031887336 | -3.674430903 |
| BTBD7P1       | 0.234832684  | 0.339351008 | 2.180710313  | 0.031895393 | -3.674630521 |
| RN7SL323P     | 0.231198061  | 0.140032666 | 2.180579817  | 0.031905378 | -3.674877819 |
| RP11-452I5.2  | 0.350915213  | 0.786368797 | 2.180475259  | 0.031913381 | -3.675075953 |
| AC079807.2    | 0.33180057   | 1.479006921 | 2.180408146  | 0.031918518 | -3.675203125 |
| AC133106.2    | 0.273093231  | 0.450086761 | 2.180292027  | 0.031927408 | -3.675423152 |
| RP11-666E17.1 | 0.246058653  | 0.147420043 | 2.18020402   | 0.031934148 | -3.675589904 |
| AF213884.3    | 0.324357459  | 0.13054291  | 2.17990042   | 0.031957406 | -3.676165106 |
| TRIM58        | 0.62322632   | 1.150677921 | 2.1796895    | 0.031973573 | -3.676564674 |
| HSPE1P10      | 0.225302841  | 0.123085893 | 2.17968224   | 0.03197413  | -3.676578428 |
| STON1         | 0.360299475  | 2.726723073 | 2.179360677  | 0.031998792 | -3.67718753  |
| RP13-923O23.6 | 0.233188023  | 0.163035513 | 2.179300275  | 0.032003426 | -3.677301935 |
| MIR3677       | 0.442866342  | 0.638310779 | 2.178902998  | 0.032033922 | -3.678054327 |
| RP11-331H13.1 | 0.241360053  | 0.362885249 | 2.178844601  | 0.032038407 | -3.678164913 |
| RP11-70O5.2   | 0.20899322   | 0.310545523 | 2.178833007  | 0.032039297 | -3.678186869 |
| RNU6-370P     | 0.286295825  | 0.18939794  | 2.178608184  | 0.032056569 | -3.67861259  |

|               |             |             |              |             |              |
|---------------|-------------|-------------|--------------|-------------|--------------|
| SLC4A8        | 0.261154016 | 0.624074357 | 2.178605181  | 0.0320568   | -3.678618276 |
| AQP11         | 0.363070752 | 0.956704222 | 2.178347905  | 0.032076575 | -3.679105398 |
| MIR3129       | 0.720292038 | 1.680753763 | 2.178300683  | 0.032080205 | -3.679194803 |
| RNU6-681P     | 0.209686951 | 0.097299298 | 2.17816055   | 0.032090982 | -3.679460103 |
| RNA5SP319     | 0.257862237 | 0.189838139 | 2.17776621   | 0.032121324 | -3.680206586 |
| RNU6-424P     | 0.216951873 | 0.07865747  | 2.177068285  | 0.032175087 | -3.681527462 |
| RP11-3G20.2   | 0.30616364  | 0.236228036 | 2.17696245   | 0.032183247 | -3.681727729 |
| NCRNA00250    | 0.238727823 | 0.145351584 | 2.176577641  | 0.03221293  | -3.682455818 |
| RP11-108O10.2 | 0.207654636 | 0.262038392 | 2.176021176  | 0.032255896 | -3.683508487 |
| AL354680.1    | 0.210201271 | 0.113672546 | 2.175908535  | 0.032264599 | -3.683721544 |
| SNORD36       | 0.207533397 | 0.061316686 | 2.175868794  | 0.03226767  | -3.68379671  |
| TMPO          | 0.32390614  | 3.60787878  | 2.175379637  | 0.032305493 | -3.684721798 |
| AC021192.1    | 0.225142965 | 0.093020287 | 2.17529091   | 0.032312357 | -3.684889578 |
| ILDR2         | 0.49849036  | 1.171750371 | 2.174963173  | 0.032337725 | -3.685509265 |
| RPS26P43      | 0.304411654 | 0.275577938 | 2.174456857  | 0.032376949 | -3.686466449 |
| AC011499.1    | 0.250200239 | 0.167426735 | 2.174181726  | 0.03239828  | -3.686986498 |
| RN7SL574P     | 0.253389103 | 0.439289728 | 2.173717073  | 0.032434334 | -3.687864645 |
| RN7SL425P     | 0.245151081 | 0.320547103 | 2.173631515  | 0.032440976 | -3.688026323 |
| OCEL1         | -0.23089246 | 2.504437811 | -2.173111025 | 0.032481411 | -3.689009764 |
| RP3-408N23.4  | 0.218700787 | 0.267625237 | 2.17285194   | 0.032501554 | -3.689499214 |
| RNU6-83P      | 0.301791138 | 0.14547474  | 2.172735803  | 0.032510588 | -3.689718598 |
| RN7SL189P     | 0.279676677 | 0.099286551 | 2.172722485  | 0.032511624 | -3.689743755 |
| ESPN          | 0.455102955 | 0.698535667 | 2.172532963  | 0.03252637  | -3.69010174  |
| SLC33A1       | 0.225623293 | 2.37050297  | 2.172107829  | 0.032559469 | -3.690904665 |
| RNA5SP485     | 0.483892076 | 0.176821254 | 2.171592131  | 0.032599659 | -3.691878447 |
| PAIP1         | 0.264154587 | 4.110784893 | 2.171523694  | 0.032604995 | -3.692007659 |
| TMEM194A      | 0.299849451 | 3.061980989 | 2.171063127  | 0.03264093  | -3.69287714  |
| HDLBP         | 0.310211231 | 5.880035312 | 2.170901361  | 0.03265356  | -3.693182491 |
| RP1-144C9.2   | 0.210570698 | 0.108929117 | 2.170361582  | 0.032695733 | -3.694201238 |
| RP11-361M10.3 | 0.23530872  | 0.291645911 | 2.169925306  | 0.032729854 | -3.695024473 |
| NCBP1         | 0.245539458 | 3.454156052 | 2.169743507  | 0.032744082 | -3.695367477 |
| ATP11A        | 0.388979885 | 1.862204951 | 2.168992718  | 0.032802896 | -3.696783737 |
| RP1-159A19.4  | 0.238653366 | 0.388337957 | 2.168457204  | 0.032844903 | -3.697793644 |

|               |              |             |              |             |              |
|---------------|--------------|-------------|--------------|-------------|--------------|
| RP11-616M22.7 | 0.264356453  | 0.10303005  | 2.168397267  | 0.032849607 | -3.697906665 |
| ANXA5         | -0.238939033 | 7.430334133 | -2.168290729 | 0.032857971 | -3.69810755  |
| PAK1IP1       | -0.261977441 | 3.650937324 | -2.168234779 | 0.032862364 | -3.698213044 |
| MFI2-AS1      | 0.507694525  | 2.325102452 | 2.16812025   | 0.032871358 | -3.69842898  |
| ESYT3         | 0.237848319  | 0.695127781 | 2.166969378  | 0.032961856 | -3.700598322 |
| RHEBP3        | 0.392820712  | 0.316025673 | 2.16694016   | 0.032964156 | -3.700653383 |
| SQLE          | 0.494670826  | 3.998839397 | 2.166181005  | 0.033023974 | -3.702083778 |
| SMG1          | 0.206784982  | 2.065820596 | 2.166027044  | 0.033036117 | -3.702373816 |
| CNPY3         | -0.383638308 | 5.582899146 | -2.165813772 | 0.033052945 | -3.702775558 |
| C1orf112      | 0.224903737  | 1.577627206 | 2.165801728  | 0.033053895 | -3.702798244 |
| AP000251.3    | 0.292522782  | 0.72461322  | 2.165375422  | 0.033087554 | -3.703601166 |
| AC087174.1    | 0.209730474  | 0.061965822 | 2.164956039  | 0.033120696 | -3.704390914 |
| RP11-254G11.1 | 0.212124027  | 0.514143338 | 2.16490388   | 0.03312482  | -3.704489126 |
| ANP32BP3      | 0.213830647  | 0.253902016 | 2.164750056  | 0.033136984 | -3.704778754 |
| RP11-292K15.2 | 0.215825586  | 0.096016946 | 2.164668643  | 0.033143424 | -3.704932035 |
| MAGEA11       | -0.513443203 | 0.722738984 | -2.163961157 | 0.033199431 | -3.706263849 |
| CKAP2L        | 0.330327196  | 2.49117653  | 2.163766867  | 0.033214826 | -3.706629524 |
| SLC13A3       | 0.332335159  | 0.538786937 | 2.163696376  | 0.033220413 | -3.706762188 |
| RP11-505P4.5  | 0.204049069  | 0.104936816 | 2.163614165  | 0.033226931 | -3.706916905 |
| CAV1          | -0.597896999 | 3.907260584 | -2.163481176 | 0.033237475 | -3.707167173 |
| MIR548L       | 0.200815461  | 0.235833063 | 2.162966115  | 0.033278342 | -3.708136319 |
| MIR2909       | 0.215003359  | 0.210779926 | 2.162847975  | 0.033287722 | -3.708358585 |
| GRM6          | 0.208038594  | 0.334423007 | 2.162610924  | 0.03330655  | -3.708804533 |
| ARL8B         | -0.267717072 | 4.205027507 | -2.162193893 | 0.033339695 | -3.70958896  |
| ZNF114        | 0.337907606  | 0.903705418 | 2.162094028  | 0.033347637 | -3.709776785 |
| CEP19         | 0.280655805  | 1.79263746  | 2.161680626  | 0.033380529 | -3.71055422  |
| RP11-649A16.1 | 0.259465678  | 0.264272085 | 2.161634146  | 0.033384229 | -3.710641622 |
| PNN           | 0.300788503  | 4.17584528  | 2.161562636  | 0.033389922 | -3.710776087 |
| SDCBP         | -0.310759871 | 5.10582362  | -2.161352016 | 0.033406694 | -3.711172104 |
| NAA20         | -0.262043987 | 4.156040355 | -2.16127351  | 0.033412948 | -3.711319707 |
| MIR199A1      | 0.304913852  | 0.458610113 | 2.161064056  | 0.033429638 | -3.711713487 |
| RNA5SP206     | 0.328699527  | 0.124379571 | 2.160498799  | 0.033474716 | -3.712776015 |
| HSPA13        | 0.390065746  | 3.834329926 | 2.160368355  | 0.033485126 | -3.713021179 |

|               |              |             |              |             |              |
|---------------|--------------|-------------|--------------|-------------|--------------|
| RNA5SP341     | 0.226654169  | 0.143855358 | 2.160294354  | 0.033491033 | -3.713160255 |
| CDC73         | 0.291811808  | 2.857565453 | 2.159910963  | 0.03352165  | -3.713880724 |
| PLEKHO1       | -0.316839531 | 3.678340758 | -2.159842617 | 0.033527111 | -3.714009147 |
| RP11-349A22.3 | 0.206308157  | 0.121709596 | 2.159567568  | 0.033549094 | -3.714525937 |
| CTD-2015A6.2  | 0.262171863  | 0.408444671 | 2.158952923  | 0.033598265 | -3.715680578 |
| PSMB6         | -0.305887401 | 5.694908362 | -2.158919261 | 0.03360096  | -3.715743806 |
| RNU6-333P     | 0.25222097   | 0.100077802 | 2.158887904  | 0.03360347  | -3.715802703 |
| RAMP2         | -0.506441252 | 3.959738748 | -2.157799801 | 0.033690683 | -3.717845988 |
| STK24         | 0.325616221  | 2.406390089 | 2.157659878  | 0.033701912 | -3.718108675 |
| C1orf189      | 0.246237738  | 0.335333021 | 2.155850465  | 0.033847417 | -3.721504243 |
| LYRM5         | -0.299049756 | 2.500546649 | -2.155456912 | 0.033879137 | -3.722242453 |
| MIR4797       | 0.292496514  | 0.156706854 | 2.155402596  | 0.033883516 | -3.722344328 |
| TIMM23B       | 0.224864016  | 1.73372254  | 2.154774002  | 0.03393424  | -3.723523145 |
| FBXL3         | 0.303450472  | 2.575956721 | 2.154755003  | 0.033935774 | -3.72355877  |
| RP11-2J18.1   | 0.215333709  | 0.41228687  | 2.154523541  | 0.033954469 | -3.723992755 |
| RN7SL170P     | 0.275580045  | 0.111864262 | 2.154424292  | 0.033962488 | -3.724178832 |
| FES           | -0.300648264 | 2.628296707 | -2.154081323 | 0.033990211 | -3.724821787 |
| NIM1K         | 0.224247012  | 0.511544754 | 2.153836713  | 0.034009996 | -3.725280297 |
| RP11-675M1.2  | 0.300758402  | 0.628289185 | 2.153569393  | 0.034031628 | -3.725781321 |
| RNA5SP292     | 0.203065662  | 0.078363568 | 2.153428403  | 0.034043043 | -3.72604555  |
| C1orf52       | -0.254108002 | 2.935695647 | -2.153133612 | 0.03406692  | -3.726597965 |
| EIF4EBP1P1    | 0.229058567  | 0.336048469 | 2.152520545  | 0.034116622 | -3.72774659  |
| ZNF341-AS1    | 0.293621333  | 0.449470967 | 2.152426988  | 0.034124212 | -3.727921852 |
| RBM41         | 0.228574699  | 1.452531134 | 2.151953509  | 0.034162649 | -3.728808714 |
| RP11-680F8.1  | 0.307838612  | 0.7204248   | 2.151887397  | 0.034168019 | -3.728932534 |
| CTD-2522B17.6 | 0.240085646  | 0.105177311 | 2.151779755  | 0.034176763 | -3.729134127 |
| BLVRA         | -0.305780053 | 4.180450946 | -2.150753408 | 0.03426024  | -3.731055822 |
| CCP110        | 0.231693999  | 1.562083329 | 2.150538973  | 0.034277703 | -3.731457219 |
| BMP8A         | 0.615013218  | 2.162895443 | 2.15040194   | 0.034288867 | -3.731713711 |
| FADS2         | 0.566625055  | 4.298520524 | 2.150363283  | 0.034292016 | -3.731786064 |
| RP11-94B19.5  | 0.271154933  | 0.102569996 | 2.14966406   | 0.034349034 | -3.733094585 |
| FP236383.3    | 1.23651432   | 5.564734695 | 2.149496337  | 0.034362723 | -3.733408405 |
| RASAL3        | -0.296666736 | 1.227781931 | -2.149390016 | 0.034371403 | -3.733607327 |



|               |              |             |              |             |              |
|---------------|--------------|-------------|--------------|-------------|--------------|
| CHCHD7        | -0.268485089 | 2.128711213 | -2.149249703 | 0.034382862 | -3.733869832 |
| CA3           | 1.31072317   | 4.47945461  | 2.149127599  | 0.034392835 | -3.734098257 |
| RNF216P1      | -0.23490451  | 2.182329906 | -2.148955964 | 0.034406859 | -3.734419325 |
| RP11-575A19.2 | -0.295510725 | 0.665954916 | -2.148885965 | 0.03441258  | -3.734550262 |
| RNU6-1247P    | 0.356615827  | 0.155210562 | 2.148553812  | 0.034439738 | -3.735171518 |
| RNA5SP125     | 0.2936638    | 0.199987809 | 2.148223603  | 0.034466755 | -3.735789053 |
| HSPG2         | 0.490311447  | 5.214632825 | 2.147817612  | 0.034499998 | -3.736548195 |
| RP11-227D13.5 | 0.227810603  | 0.137000158 | 2.147729995  | 0.034507176 | -3.736712009 |
| UBXN7-AS1     | 0.242983314  | 0.342043321 | 2.147421339  | 0.034532472 | -3.737289043 |
| PPAPDC1B      | 0.354796213  | 3.264027203 | 2.147017387  | 0.034565603 | -3.738044122 |
| RNU6-471P     | 0.220876651  | 0.072619759 | 2.146724737  | 0.034589622 | -3.738591073 |
| JRKL          | 0.298555897  | 2.13389824  | 2.146702794  | 0.034591423 | -3.73863208  |
| NUTF2P6       | 0.249450233  | 0.456083408 | 2.146611335  | 0.034598933 | -3.738802999 |
| KCTD20        | 0.24901965   | 4.396043937 | 2.146507685  | 0.034607446 | -3.73899669  |
| NREP          | -0.409387484 | 3.656222016 | -2.146450656 | 0.03461213  | -3.739103259 |
| UBQLN1        | 0.212802372  | 3.991211249 | 2.146264919  | 0.034627391 | -3.73945032  |
| KANSL1L       | 0.221395619  | 1.199626088 | 2.146094052  | 0.034641435 | -3.739769571 |
| SSR3          | 0.28679922   | 5.801790889 | 2.145861104  | 0.034660589 | -3.740204779 |
| LIMS2         | -0.265073059 | 0.94525676  | -2.145535143 | 0.034687407 | -3.74081369  |
| AC008169.1    | 0.232940656  | 0.091111391 | 2.145110687  | 0.034722356 | -3.741606472 |
| KCNK15        | 0.243188847  | 0.467509023 | 2.144611953  | 0.034763459 | -3.742537808 |
| FERMT2        | 0.310409993  | 3.786615891 | 2.144280208  | 0.034790824 | -3.743157204 |
| KIAA1377      | 0.247093587  | 0.846390205 | 2.1438521    | 0.034826164 | -3.743956389 |
| STAG1         | 0.290233446  | 2.09414185  | 2.143375961  | 0.034865507 | -3.74484507  |
| PSMA1         | -0.253768774 | 4.378997755 | -2.143059027 | 0.034891716 | -3.745436509 |
| ZNF460        | 0.347201807  | 1.474344167 | 2.1427878    | 0.034914159 | -3.745942591 |
| CISH          | -0.283349474 | 1.415144823 | -2.142252239 | 0.034958511 | -3.746941725 |
| RNU5E-10P     | 0.34023029   | 0.536391577 | 2.142178364  | 0.034964632 | -3.747079529 |
|               | 1-Sep        | 0.799148121 | -2.142117882 | 0.034969645 | -3.747192346 |
| GAR1          | -0.2696522   | 4.013816592 | -2.141966921 | 0.034982159 | -3.747473919 |
| ACA59         | 0.213853721  | 0.351334867 | 2.141697909  | 0.035004469 | -3.747975642 |
| RP11-855A2.1  | 0.251571001  | 0.73923246  | 2.141587399  | 0.035013637 | -3.748181732 |
| AC064846.1    | 0.200527001  | 0.064985415 | 2.141107954  | 0.035053438 | -3.749075743 |

|               |              |             |              |             |              |
|---------------|--------------|-------------|--------------|-------------|--------------|
| SYTL2         | 0.492873017  | 2.725684527 | 2.140321311  | 0.035118825 | -3.75054219  |
| FAM63B        | 0.333919041  | 2.486624739 | 2.140244282  | 0.035125234 | -3.750685761 |
| MED14         | 0.285866636  | 3.203217997 | 2.139473395  | 0.035189425 | -3.752122324 |
| RP11-843P14.1 | 0.211109284  | 0.552029509 | 2.138763826  | 0.0352486   | -3.753444214 |
| IDH3G         | -0.28981961  | 4.54638988  | -2.138562234 | 0.035265428 | -3.753819698 |
| AC007919.19   | 0.220855182  | 0.129371431 | 2.138521168  | 0.035268856 | -3.753896183 |
| AL161757.1    | 0.241144943  | 0.089371504 | 2.138507215  | 0.035270021 | -3.75392217  |
| RNA5SP209     | 0.279683782  | 0.139552869 | 2.138376732  | 0.035280918 | -3.754165185 |
| CFL1P2        | 0.28435515   | 1.064688726 | 2.138182201  | 0.035297169 | -3.754527459 |
| RNU6-845P     | 0.236018095  | 0.08953946  | 2.13805899   | 0.035307466 | -3.754756899 |
| PRICKLE1      | -0.390580504 | 1.028867434 | -2.137716923 | 0.035336065 | -3.755393826 |
| AC079907.1    | 0.439778078  | 0.954740962 | 2.137359205  | 0.035365994 | -3.756059796 |
| PTPRD-AS1     | 0.279264048  | 0.989496247 | 2.137104761  | 0.035387296 | -3.75653344  |
| GS1-309P15.3  | 0.255769282  | 0.319762163 | 2.136834532  | 0.035409932 | -3.757036411 |
| LRIG1         | -0.553043553 | 1.458285434 | -2.136766481 | 0.035415634 | -3.757163063 |
| LLNLR-304A6.1 | 0.223379294  | 0.350262592 | 2.136669714  | 0.035423744 | -3.757343154 |
| RNU6-497P     | 0.29875642   | 0.191200215 | 2.136616758  | 0.035428183 | -3.757441707 |
| TMEM161B-AS1  | -0.209436546 | 0.99602696  | -2.136114887 | 0.035470274 | -3.758375594 |
| RNU6-176P     | 0.315928705  | 0.227043272 | 2.136099906  | 0.035471531 | -3.758403467 |
| KLHL4         | -0.366235827 | 0.592373754 | -2.136066937 | 0.035474298 | -3.75846481  |
| ZNF863P       | 0.20058843   | 0.107261408 | 2.135142169  | 0.035551978 | -3.76018508  |
| SH3BGRL       | -0.312424228 | 5.305417619 | -2.134881573 | 0.035573895 | -3.760669726 |
| PROSER1       | 0.24035159   | 2.288621363 | 2.134681779  | 0.035590706 | -3.761041259 |
| RP11-71L14.3  | 0.340122027  | 0.643163818 | 2.134592016  | 0.035598261 | -3.761208171 |
| AL080243.1    | 0.281148349  | 0.182095982 | 2.134545292  | 0.035602194 | -3.76129505  |
| MIR516B1      | 0.200676418  | 0.085547736 | 2.134306109  | 0.035622334 | -3.761739765 |
| AC097724.3    | 0.207822564  | 0.555552805 | 2.134240846  | 0.035627832 | -3.761861101 |
| ANKRD9        | 0.352566448  | 2.428640594 | 2.13409611   | 0.035640025 | -3.762130179 |
| HCG25         | 0.235423539  | 0.857919128 | 2.133780336  | 0.035666641 | -3.76271718  |
| RP11-339A7.1  | 0.239828204  | 0.240964928 | 2.133214712  | 0.035714359 | -3.763768439 |
| PPIH          | -0.305265623 | 3.999176737 | -2.133171542 | 0.035718004 | -3.763848664 |
| SNORA70       | 0.368647287  | 0.549872946 | 2.133075996  | 0.03572607  | -3.764026217 |
| RN7SKP55      | 0.310421825  | 0.169875578 | 2.132942488  | 0.035737345 | -3.764274301 |

|               |        |              |             |              |             |              |
|---------------|--------|--------------|-------------|--------------|-------------|--------------|
| NAPSB         |        | -0.299890614 | 0.615195646 | -2.132573542 | 0.035768518 | -3.764959806 |
| UTP14C        |        | 0.229577372  | 2.362827912 | 2.13222329   | 0.035798133 | -3.76561048  |
| RP11-259N19.1 |        | -0.355817411 | 1.469509959 | -2.131515887 | 0.035858012 | -3.766924351 |
| ZSCAN12       |        | 0.221811523  | 1.082516846 | 2.130945122  | 0.035906388 | -3.767984161 |
| EPHA6         |        | 0.23034303   | 0.312567858 | 2.130843848  | 0.035914978 | -3.768172182 |
| FBXO4         |        | 0.253718765  | 1.932683131 | 2.13063488   | 0.035932707 | -3.768560119 |
| RP6-24A23.3   |        | 0.553360013  | 0.367233355 | 2.129579844  | 0.036022335 | -3.770518213 |
| RN7SL503P     |        | 0.225783832  | 0.229859309 | 2.129430912  | 0.036035003 | -3.770794553 |
| RNU4-42P      |        | 0.412888242  | 0.232993524 | 2.128870913  | 0.036082669 | -3.771833466 |
| AC008622.1    |        | 0.400462842  | 0.354270023 | 2.128530131  | 0.036111703 | -3.772465569 |
| RP11-381I15.1 |        | 0.214969622  | 0.067193487 | 2.128455448  | 0.036118068 | -3.772604081 |
| NDUFA3P2      |        | 0.23604365   | 0.391976738 | 2.128390646  | 0.036123592 | -3.772724266 |
|               | 10-Sep | 0.329144437  | 3.498014079 | 2.128211083  | 0.036138903 | -3.773057274 |
| AC093673.5    |        | -0.389831566 | 2.68742522  | -2.128082861 | 0.036149839 | -3.773295052 |
| C9orf40       |        | 0.328985728  | 2.66037841  | 2.12793507   | 0.036162449 | -3.773569103 |
| S1PR2         |        | -0.288324885 | 2.656637986 | -2.127702431 | 0.036182305 | -3.774000457 |
| MIR876        |        | 0.218637724  | 0.093974938 | 2.127593157  | 0.036191635 | -3.774203055 |
| RNU7-20P      |        | 0.419730366  | 0.147770216 | 2.1275626    | 0.036194244 | -3.774259707 |
| SLC25A17      |        | -0.229561285 | 3.004004293 | -2.127320156 | 0.036214953 | -3.774709168 |
| MIR100        |        | 0.20343717   | 0.094230824 | 2.127117014  | 0.036232312 | -3.775085733 |
| RP11-7N14.1   |        | 0.296090975  | 0.126819502 | 2.126966548  | 0.036245175 | -3.775364631 |
| RNU6-1057P    |        | 0.25698938   | 0.276191705 | 2.126875417  | 0.036252968 | -3.775533541 |
| MIR4790       |        | 0.251582982  | 0.150827989 | 2.126789285  | 0.036260334 | -3.775693178 |
| EPHA8         |        | 0.21237482   | 0.119422452 | 2.126472832  | 0.036287409 | -3.776279644 |
| GPX1P2        |        | -0.201218042 | 0.672700057 | -2.126193663 | 0.036311309 | -3.776796947 |
| RP11-561N12.6 |        | 0.488404163  | 0.860023915 | 2.126102596  | 0.036319108 | -3.776965683 |
| RP1-96H9.5    |        | 0.37633203   | 0.84582319  | 2.125895628  | 0.036336839 | -3.777349145 |
| LEMD3         |        | 0.240483106  | 2.688840556 | 2.125630513  | 0.036359562 | -3.77784029  |
| BATF3         |        | -0.23348205  | 0.751287616 | -2.125599393 | 0.036362231 | -3.777897938 |
| RNU7-174P     |        | 0.637634606  | 0.512528576 | 2.125560833  | 0.036365537 | -3.777969368 |
| CTA-228A9.3   |        | 0.565052724  | 1.437903802 | 2.125257421  | 0.036391561 | -3.778531376 |
| RTP4          |        | -0.386045687 | 1.192056052 | -2.125166113 | 0.036399396 | -3.778700492 |
| UGGT1         |        | 0.24811137   | 3.929714021 | 2.124651285  | 0.036443599 | -3.779653905 |

|                |       |              |             |              |             |              |
|----------------|-------|--------------|-------------|--------------|-------------|--------------|
| NDUFC2         |       | -0.286078406 | 3.370988257 | -2.123784434 | 0.036518133 | -3.781258768 |
| RP11-1079K10.1 |       | 0.213519836  | 0.13271937  | 2.12369859   | 0.036525521 | -3.781417665 |
| RNU6-1300P     |       | -0.322805608 | 0.569768258 | -2.122781684 | 0.036604516 | -3.783114501 |
| RP11-114H24.6  |       | -0.320222483 | 0.688632825 | -2.122618741 | 0.036618569 | -3.783415976 |
| DNER           |       | 0.220508074  | 0.192212194 | 2.122604787  | 0.036619773 | -3.783441793 |
| CHAF1B         |       | 0.376811503  | 2.640147507 | 2.122222912  | 0.036652729 | -3.784148248 |
| CLIP1          |       | 0.213352343  | 1.997675831 | 2.12160793   | 0.036705855 | -3.785285707 |
| AP003025.2     |       | 0.260421886  | 0.144073747 | 2.121590404  | 0.03670737  | -3.785318119 |
| MIR519B        |       | 0.248607149  | 0.119912818 | 2.121536671  | 0.036712015 | -3.785417488 |
|                | 8-Sep | -0.235915055 | 3.221953843 | -2.121293791 | 0.036733018 | -3.785866618 |
| RP5-1053E7.2   |       | 0.2376135    | 0.105942319 | 2.120616108  | 0.036791676 | -3.78711954  |
| ERGIC3         |       | -0.268000142 | 5.152860045 | -2.12040811  | 0.036809696 | -3.787504021 |
| PRKDC          |       | 0.358923289  | 4.601246892 | 2.120285395  | 0.036820331 | -3.787730843 |
| PSME1          |       | -0.358938602 | 5.548408973 | -2.12000265  | 0.036844845 | -3.788253412 |
| AC079756.1     |       | 0.238337055  | 0.11323148  | 2.119948689  | 0.036849525 | -3.788353136 |
| HIP1R          |       | -0.263100746 | 1.233548755 | -2.119827733 | 0.036860017 | -3.788576664 |
| FICD           |       | 0.224592552  | 1.622426273 | 2.119820009  | 0.036860687 | -3.788590937 |
| STAG3L5P       |       | 0.233667976  | 1.085238387 | 2.119420541  | 0.036895358 | -3.78932907  |
| COPB2          |       | 0.225552933  | 4.523363937 | 2.118872545  | 0.036942966 | -3.790341452 |
| TRAPPC6A       |       | -0.38970267  | 3.451790423 | -2.118230739 | 0.036998791 | -3.791526843 |
| TEX22          |       | 0.224660457  | 0.395871151 | 2.118102267  | 0.037009975 | -3.791764087 |
| GALNT2         |       | 0.292917424  | 3.691614621 | 2.118095373  | 0.037010575 | -3.791776818 |
| AMICA1         |       | -0.218113015 | 0.532908899 | -2.117979324 | 0.03702068  | -3.79199111  |
| RN7SL149P      |       | 0.207111484  | 0.109450947 | 2.117063492  | 0.037100507 | -3.793681881 |
| RNA5SP177      |       | 0.274502855  | 0.127693134 | 2.117057963  | 0.03710099  | -3.793692086 |
| PRRC2C         |       | 0.34467276   | 4.377107599 | 2.116950543  | 0.037110363 | -3.793890358 |
| DTX4           |       | 0.580227594  | 3.738595252 | 2.116363681  | 0.037161606 | -3.794973403 |
| IRS4           |       | 0.630119982  | 0.385157734 | 2.116186223  | 0.037177114 | -3.795300847 |
| AC012168.1     |       | 0.220609366  | 0.134262436 | 2.116039503  | 0.037189939 | -3.795571554 |
| RNU6-46P       |       | 0.248320463  | 0.204436453 | 2.115619759  | 0.037226652 | -3.796345915 |
| SSR1P1         |       | 0.251073603  | 0.084267829 | 2.11463093   | 0.037313264 | -3.798169605 |
| RSF1-IT1       |       | 0.278595083  | 0.434078271 | 2.114291726  | 0.037343016 | -3.798795022 |
| RHCE           |       | 0.33158345   | 1.356289588 | 2.114263443  | 0.037345497 | -3.798847166 |

|               |              |             |              |             |              |
|---------------|--------------|-------------|--------------|-------------|--------------|
| OLFM3         | -0.349042663 | 0.419848282 | -2.114172473 | 0.03735348  | -3.799014876 |
| RNU6-612P     | 0.228547793  | 0.098179361 | 2.114004002  | 0.037368268 | -3.79932545  |
| ATP5E         | -0.333922012 | 4.707354695 | -2.113980445 | 0.037370336 | -3.799368875 |
| LRP5          | 0.346184916  | 3.289898037 | 2.113166647  | 0.037441842 | -3.800868772 |
| LINC01420     | -0.364265101 | 4.314157121 | -2.112538134 | 0.037497149 | -3.802026822 |
| GLIPR2        | -0.396271771 | 2.813850704 | -2.112348687 | 0.037513834 | -3.802375822 |
| AC018693.5    | 0.207046751  | 0.099191425 | 2.112332654  | 0.037515246 | -3.802405356 |
| RAB1A         | -0.232447983 | 5.8202623   | -2.11188191  | 0.03755497  | -3.8032356   |
| CMKLR1        | -0.420754341 | 2.220547974 | -2.111581537 | 0.037581462 | -3.803788782 |
| HEATR6        | 0.208069659  | 2.325969579 | 2.111543575  | 0.037584812 | -3.803858691 |
| BCL9L         | 0.382817391  | 2.809903889 | 2.111374309  | 0.037599749 | -3.804170382 |
| COBLL1        | 0.225318494  | 0.622503266 | 2.110792517  | 0.037651129 | -3.805241545 |
| AC092170.1    | 0.201002828  | 0.132025834 | 2.110764408  | 0.037653613 | -3.805293291 |
| ZNF664        | 0.346672914  | 4.411208236 | 2.110506271  | 0.037676431 | -3.805768469 |
| HMG2P18       | 0.242179536  | 0.261926129 | 2.110374763  | 0.03768806  | -3.806010527 |
| RP11-178L8.9  | 0.211012484  | 0.434356059 | 2.110265674  | 0.037697709 | -3.806211312 |
| EVI2B         | -0.510215674 | 2.875843971 | -2.110242489 | 0.03769976  | -3.806253984 |
| SOWAHC        | 0.248602284  | 1.840715757 | 2.110218984  | 0.037701839 | -3.806297244 |
| RP11-448N11.2 | 0.246780048  | 0.165233511 | 2.110139139  | 0.037708903 | -3.806444193 |
| CTD-2036J7.1  | 0.201424221  | 0.250374742 | 2.109813923  | 0.037737689 | -3.807042681 |
| TCF23         | 0.218352498  | 0.229838873 | 2.109247959  | 0.037787829 | -3.808084018 |
| RC3H1-IT1     | 0.303661924  | 0.583761829 | 2.108968039  | 0.037812649 | -3.808598961 |
| IGLC3         | -0.739599333 | 1.047147361 | -2.108866428 | 0.037821662 | -3.808785869 |
| AC093376.1    | 0.204557556  | 0.105791135 | 2.108745028  | 0.037832433 | -3.809009168 |
| POFUT2        | 0.292493514  | 3.895842697 | 2.108517803  | 0.0378526   | -3.809427087 |
| RP11-18B16.2  | 0.498160259  | 1.788735886 | 2.108406336  | 0.037862497 | -3.809632086 |
| PLAA          | 0.260795933  | 3.013668406 | 2.107577003  | 0.037936199 | -3.811157009 |
| MIEN1         | -0.309828712 | 3.260898166 | -2.107431593 | 0.037949135 | -3.811424324 |
| EPRS          | 0.315613295  | 4.784316459 | 2.107187729  | 0.037970837 | -3.811872595 |
| AC093816.1    | 0.273498635  | 0.144256856 | 2.106971706  | 0.03799007  | -3.812269649 |
| RNU6-967P     | 0.214266181  | 0.068207963 | 2.106742252  | 0.038010509 | -3.812691352 |
| HIGD1AP9      | 0.320681275  | 0.460997697 | 2.106355093  | 0.038045016 | -3.813402797 |
| C15orf61      | 0.220007702  | 1.458799284 | 2.106342511  | 0.038046138 | -3.813425916 |

|               |              |             |              |             |              |
|---------------|--------------|-------------|--------------|-------------|--------------|
| NUDT2         | -0.372767161 | 3.409798865 | -2.106290398 | 0.038050785 | -3.81352167  |
| MRPS31P4      | 0.20974807   | 1.094206389 | 2.105495624  | 0.038121718 | -3.814981746 |
| MICAL1        | -0.286908657 | 2.149781693 | -2.105278358 | 0.038141128 | -3.815380799 |
| AL353805.1    | 0.301347682  | 0.328851833 | 2.10498976   | 0.038166925 | -3.815910812 |
| AL121899.1    | 0.263657272  | 0.225620036 | 2.104764704  | 0.038187052 | -3.816324082 |
| ZBTB34        | 0.2349898    | 2.034310103 | 2.104431966  | 0.038216826 | -3.816935018 |
| RNU6-859P     | 0.226229708  | 0.160580799 | 2.104380091  | 0.03822147  | -3.817030257 |
| NES           | 0.577839879  | 5.63630695  | 2.104289527  | 0.038229579 | -3.817196522 |
| AC116035.1    | 0.249767768  | 0.147684335 | 2.103331176  | 0.038315472 | -3.818955547 |
| RN7SKP65      | 0.205863759  | 0.111435533 | 2.103326047  | 0.038315932 | -3.81896496  |
| NEURL1        | 0.3276793    | 0.796661319 | 2.103008617  | 0.038344419 | -3.819547434 |
| EFS           | 0.573093923  | 4.083116864 | 2.102798335  | 0.0383633   | -3.819933251 |
| FAM72B        | 0.204030743  | 1.166231404 | 2.101666287  | 0.038465086 | -3.8220097   |
| HARS          | -0.225673503 | 2.850224012 | -2.101224847 | 0.03850484  | -3.822819136 |
| AP3S1         | -0.208902364 | 4.108833497 | -2.100960071 | 0.038528702 | -3.823304562 |
| SIN3A         | 0.236899425  | 2.65171624  | 2.10078527   | 0.038544462 | -3.823625003 |
| SNORD59       | 0.412344734  | 0.230318857 | 2.100670894  | 0.038554777 | -3.823834663 |
| GIMAP8        | -0.366634739 | 1.836158949 | -2.100447474 | 0.038574934 | -3.824244176 |
| MTUS1         | -0.274544615 | 1.556830268 | -2.100136879 | 0.03860297  | -3.824813411 |
| RP11-384C4.2  | 0.245320466  | 0.480917758 | 2.099977393  | 0.038617373 | -3.825105677 |
| RNU7-169P     | 0.304123687  | 0.172450159 | 2.099913598  | 0.038623136 | -3.825222579 |
| OLMALINC      | 0.313429025  | 1.802294764 | 2.099754713  | 0.038637491 | -3.825513714 |
| PTPLB         | 0.269304345  | 3.409939138 | 2.099641638  | 0.03864771  | -3.825720896 |
| RNA5SP276     | 0.205386136  | 0.072636095 | 2.099391762  | 0.038670301 | -3.826178699 |
| MBTD1         | 0.208479578  | 1.761282324 | 2.098872018  | 0.038717326 | -3.827130776 |
| TMEM185B      | 0.268077475  | 3.650227166 | 2.098436329  | 0.038756785 | -3.827928718 |
| SPINT2        | -0.420863463 | 1.229968632 | -2.09824491  | 0.038774132 | -3.828279245 |
| GPD1L         | -0.222978978 | 1.983619206 | -2.098203847 | 0.038777854 | -3.828354436 |
| RP11-511B23.1 | 0.209700763  | 0.108509813 | 2.098125222  | 0.038784982 | -3.828498403 |
| IL2RG         | -0.475925894 | 1.812272764 | -2.097855458 | 0.038809446 | -3.828992321 |
| RP11-295D4.3  | 0.210586047  | 0.713687175 | 2.097646771  | 0.03882838  | -3.829374373 |
| RP11-73M18.10 | 0.318153285  | 1.799764452 | 2.097646767  | 0.038828381 | -3.829374381 |
| BNIP3P35      | 0.216342677  | 0.104669823 | 2.097601711  | 0.03883247  | -3.829456862 |

|               |       |              |             |              |             |              |
|---------------|-------|--------------|-------------|--------------|-------------|--------------|
| RP11-785H5.1  |       | -0.313860594 | 3.084352955 | -2.097433613 | 0.038847728 | -3.829764574 |
| ANKRD10-IT1   |       | 0.492611053  | 2.836583865 | 2.09729027   | 0.038860744 | -3.830026955 |
| LRRC8D        |       | -0.359348556 | 1.869695941 | -2.09715661  | 0.038872884 | -3.830271597 |
| PRR15         |       | 0.355684603  | 0.465968248 | 2.097151931  | 0.03887331  | -3.830280161 |
| RP3-522P13.1  |       | 0.239634692  | 0.219934131 | 2.096934422  | 0.038893073 | -3.830678243 |
| RNU6-1165P    |       | 0.328097222  | 0.520660469 | 2.096663879  | 0.038917667 | -3.831173336 |
| CEP97         |       | 0.226919341  | 1.412406051 | 2.096598721  | 0.038923592 | -3.831292566 |
| RNU7-29P      |       | 0.207555035  | 0.086272703 | 2.096395355  | 0.03894209  | -3.831664678 |
|               | 6-Sep | -0.30942366  | 2.249772435 | -2.096253636 | 0.038954986 | -3.83192397  |
| AL022237.3    |       | 0.200272758  | 0.185847458 | 2.095591497  | 0.039015284 | -3.83313523  |
| AC073842.19   |       | 0.202218493  | 0.155505001 | 2.095571991  | 0.039017062 | -3.833170907 |
| ZNF83         |       | 0.245796459  | 2.129942374 | 2.095453712  | 0.039027842 | -3.833387238 |
| AC100821.1    |       | 0.288745487  | 0.268483338 | 2.095193823  | 0.039051538 | -3.833862534 |
| MIR1254-2     |       | 0.257803497  | 0.084058439 | 2.09487202   | 0.039080896 | -3.834450989 |
| AC136932.2    |       | 0.309563152  | 0.12466021  | 2.094681977  | 0.039098243 | -3.834798467 |
| A2ML1-AS1     |       | 0.209605704  | 0.101219777 | 2.094664043  | 0.03909988  | -3.834831257 |
| BCR           |       | -0.244821392 | 1.865478921 | -2.094521334 | 0.039112911 | -3.835092168 |
| RELT          |       | 0.278175299  | 2.10764443  | 2.094388062  | 0.039125084 | -3.83533581  |
| RNU6-857P     |       | 0.305679387  | 0.157825007 | 2.094293868  | 0.039133689 | -3.835508005 |
| MYO10         |       | 0.33129339   | 3.729823849 | 2.094238867  | 0.039138715 | -3.835608548 |
| MAF           |       | -0.483997561 | 3.85520898  | -2.094178019 | 0.039144275 | -3.835719777 |
| KLF12         |       | 0.281068115  | 1.727125635 | 2.094120027  | 0.039149575 | -3.835825781 |
| MEF2D         |       | 0.294827406  | 4.178930197 | 2.094060677  | 0.039155    | -3.835934267 |
| RP11-360D2.2  |       | 0.334109151  | 0.974063541 | 2.093987531  | 0.039161687 | -3.836067965 |
| EIF3F         |       | -0.275783462 | 3.913145979 | -2.09384317  | 0.039174886 | -3.836331819 |
| WWTR1-IT1     |       | 0.351837942  | 0.694418671 | 2.093621231  | 0.039195187 | -3.836737435 |
| MELK          |       | 0.316743562  | 3.378895331 | 2.093492469  | 0.039206969 | -3.836972743 |
| PAXBP1        |       | 0.282326572  | 2.361045631 | 2.092853086  | 0.03926552  | -3.838141001 |
| RP6-24A23.7   |       | 0.693204283  | 0.436437206 | 2.092683958  | 0.03928102  | -3.838449972 |
| AC016722.3    |       | 0.233973389  | 0.139833418 | 2.09211841   | 0.03933289  | -3.83948298  |
| IFT57         |       | -0.276687345 | 2.564185292 | -2.091988874 | 0.039344778 | -3.83971955  |
| ADD3          |       | 0.314898336  | 2.89696586  | 2.091951375  | 0.039348221 | -3.839788031 |
| CTD-2313J17.3 |       | 0.204170606  | 0.183638453 | 2.091883664  | 0.039354437 | -3.839911684 |

|               |              |             |              |             |              |
|---------------|--------------|-------------|--------------|-------------|--------------|
| AP000547.1    | 0.249774653  | 0.102723098 | 2.091757734  | 0.039366    | -3.840141646 |
| IFITM10       | -0.502586355 | 2.321288258 | -2.091752427 | 0.039366488 | -3.840151336 |
| CHEK1         | 0.300037669  | 2.395338127 | 2.091711493  | 0.039370247 | -3.840226083 |
| RNU6-659P     | 0.286508185  | 0.12749511  | 2.091506713  | 0.039389058 | -3.840599999 |
| RNU6-776P     | 0.264968124  | 0.092058749 | 2.091388857  | 0.039399888 | -3.840815182 |
| RP11-350N15.4 | 0.455688589  | 1.798051087 | 2.091308105  | 0.03940731  | -3.840962614 |
| MLANA         | 0.286239919  | 0.72899444  | 2.091002089  | 0.039435447 | -3.841521273 |
| MIR8054       | 0.21715666   | 0.12197979  | 2.09055188   | 0.039476874 | -3.842343036 |
| LPHN2         | -0.418882982 | 3.322282937 | -2.090155361 | 0.039513391 | -3.843066666 |
| RP11-444D13.1 | 0.22379818   | 0.153792892 | 2.090071003  | 0.039521164 | -3.8432206   |
| COCH          | 0.744175869  | 1.366680343 | 2.089931954  | 0.039533979 | -3.843474321 |
| ASB13         | -0.239092359 | 2.499978306 | -2.08981964  | 0.039544332 | -3.843679248 |
| TRBV20-1      | -0.296670067 | 0.368769214 | -2.089705157 | 0.039554888 | -3.843888122 |
| IVD           | -0.235318832 | 2.984277409 | -2.08955908  | 0.039568361 | -3.844154624 |
| FLJ20021      | -0.311042089 | 2.500231001 | -2.089280954 | 0.039594023 | -3.84466199  |
| WDR4          | 0.289176554  | 3.056845893 | 2.088785348  | 0.039639787 | -3.845565938 |
| CETN2         | -0.255371914 | 3.993872635 | -2.088348057 | 0.039680204 | -3.846363365 |
| SDF2          | -0.264119206 | 3.43143286  | -2.087836058 | 0.039727572 | -3.847296838 |
| ZNF713        | 0.2539847    | 0.868623936 | 2.087632121  | 0.039746453 | -3.847668596 |
|               | 2-Mar        |             |              |             |              |
| ITGB1         | -0.333034232 | 2.768926837 | -2.087233666 | 0.039783365 | -3.848394851 |
|               | 0.400048573  | 6.006735313 | 2.086642996  | 0.039838138 | -3.849471221 |
| NPM1P21       | 0.216892357  | 0.625708162 | 2.086594402  | 0.039842647 | -3.849559761 |
| RP11-438L7.1  | 0.205538106  | 0.082791951 | 2.086572837  | 0.039844648 | -3.849599054 |
| AP000997.1    | 0.301859106  | 0.33633686  | 2.086536633  | 0.039848007 | -3.849665016 |
| AC108479.3    | 0.315660888  | 0.834621419 | 2.086403344  | 0.039860379 | -3.849907859 |
| TMEM184A      | 0.248293286  | 0.310321205 | 2.086020986  | 0.039895887 | -3.850604408 |
| FASN          | 0.414132176  | 4.716801095 | 2.085994725  | 0.039898327 | -3.850652244 |
| GPIHBP1       | -0.415895581 | 1.300285102 | -2.085876219 | 0.039909338 | -3.850868103 |
| LMO2          | -0.370275626 | 2.427076418 | -2.085444064 | 0.039949515 | -3.851655181 |
| RNU1-87P      | 0.273516389  | 0.293118574 | 2.08528385   | 0.039964418 | -3.85194694  |
| PCP4L1        | 0.496473329  | 1.250335352 | 2.084965954  | 0.039994004 | -3.852525786 |
| RP1-200K18.1  | 0.238021576  | 0.153500151 | 2.084814639  | 0.040008094 | -3.852801285 |
| PHRF1         | 0.229319028  | 3.330988189 | 2.084540198  | 0.040033658 | -3.85330091  |



|                |              |             |              |             |              |
|----------------|--------------|-------------|--------------|-------------|--------------|
| RPUSD3         | -0.241219885 | 2.139545162 | -2.083907902 | 0.040092612 | -3.854451791 |
| HYOU1          | 0.32846824   | 4.917939723 | 2.083286527  | 0.04015062  | -3.855582492 |
| LPGAT1         | 0.253310073  | 2.631277551 | 2.083049851  | 0.040172734 | -3.856013085 |
| RP13-152O15.5  | 0.246172511  | 0.700226496 | 2.082782532  | 0.040197723 | -3.856499376 |
| IGLC2          | -0.937054347 | 1.608406268 | -2.082771982 | 0.04019871  | -3.856518567 |
| EXOSC4         | -0.369701043 | 4.301961409 | -2.082287542 | 0.040244031 | -3.857399685 |
| RP11-179A7.2   | 0.201014807  | 0.136006383 | 2.081698641  | 0.040299185 | -3.858470551 |
| RP4-612C19.1   | 0.202491952  | 0.275843694 | 2.081540926  | 0.040313967 | -3.858757298 |
| MIR1302-6      | 0.230619456  | 0.093489536 | 2.081401729  | 0.040327017 | -3.85901036  |
| RNA5SP42       | 0.208174289  | 0.104909886 | 2.081149452  | 0.040350678 | -3.859468963 |
| CTC-250I14.1   | 0.296613927  | 0.915349213 | 2.080928832  | 0.04037138  | -3.859869976 |
| AC008686.1     | 0.233311276  | 0.49855085  | 2.080521571  | 0.040409619 | -3.860610142 |
| RP11-173M1.4   | 0.244330081  | 0.34118394  | 2.080470808  | 0.040414388 | -3.860702391 |
| RP11-803B1.3   | 0.211453366  | 0.229097677 | 2.080413882  | 0.040419736 | -3.860805838 |
| CTC-339F2.2    | 0.250442061  | 0.672275397 | 2.080355847  | 0.040425189 | -3.860911296 |
| IPO9           | 0.246712016  | 3.228552581 | 2.080233779  | 0.04043666  | -3.861133105 |
| RP4-657E11.10  | 0.414784101  | 2.20181081  | 2.080129242  | 0.040446486 | -3.861323048 |
| UHMK1          | 0.26350345   | 3.310714382 | 2.079250017  | 0.040529212 | -3.86292026  |
| RBM47          | -0.292591407 | 1.32465518  | -2.079007288 | 0.040552076 | -3.863361099 |
| TRIM62         | -0.235406648 | 1.67495758  | -2.078968966 | 0.040555686 | -3.863430693 |
| ZNF330         | -0.268063606 | 3.45259383  | -2.078968299 | 0.040555749 | -3.863431905 |
| RN7SL612P      | 0.310887668  | 0.206581915 | 2.07881348   | 0.040570339 | -3.863713055 |
| CTD-2189E23.1  | 0.214736049  | 0.195593892 | 2.078688376  | 0.040582132 | -3.863940228 |
| SNORA2B        | 0.253850555  | 0.563417191 | 2.078549078  | 0.040595267 | -3.864193161 |
| AC090666.1     | 0.255777828  | 0.220272913 | 2.078514034  | 0.040598572 | -3.864256791 |
| RP11-169D4.2   | 0.553421087  | 0.763823434 | 2.077935523  | 0.040653163 | -3.865307059 |
| AL132640.1     | 0.262815198  | 0.120452739 | 2.077297853  | 0.040713411 | -3.866464423 |
| RP11-577B7.1   | 0.244927798  | 0.138798019 | 2.077100545  | 0.040732068 | -3.866822471 |
| RNU6-899P      | 0.255053809  | 0.128416788 | 2.076998162  | 0.040741752 | -3.867008249 |
| LMO7           | 0.403568936  | 2.946476332 | 2.076956213  | 0.040745721 | -3.867084365 |
| RP11-1263C18.1 | 0.211123571  | 0.107790974 | 2.076504623  | 0.040788463 | -3.867903683 |
| NDUFS3         | -0.297501057 | 3.716688269 | -2.076474864 | 0.040791281 | -3.867957669 |
| MIR583         | 0.211273119  | 0.120149994 | 2.075431719  | 0.040890167 | -3.869849607 |

|               |              |             |              |             |              |
|---------------|--------------|-------------|--------------|-------------|--------------|
| AP003385.2    | 0.200065603  | 0.0899147   | 2.075409102  | 0.040892313 | -3.869890617 |
| ST3GAL5       | -0.335987798 | 2.087609128 | -2.075386787 | 0.040894431 | -3.86993108  |
| DENND1B       | 0.244932966  | 1.094376576 | 2.075317163  | 0.040901039 | -3.870057323 |
| ASCC3         | 0.219205823  | 2.240462709 | 2.074868403  | 0.040943652 | -3.87087093  |
| CTB-186G2.1   | 0.237895745  | 0.201689376 | 2.07482189   | 0.040948071 | -3.87095525  |
| CIZ1          | 0.250861152  | 4.584552265 | 2.074742047  | 0.040955658 | -3.871099986 |
| MRPL23        | -0.417490882 | 2.632361139 | -2.074627123 | 0.04096658  | -3.871308307 |
| AC113133.2    | 0.223540181  | 0.090674016 | 2.074599383  | 0.040969217 | -3.87135859  |
| COQ9          | -0.228372634 | 2.978981591 | -2.074351047 | 0.040992827 | -3.871808706 |
| IL17RA        | -0.317999966 | 1.731881662 | -2.074113337 | 0.041015439 | -3.872239517 |
| RN7SL824P     | 0.284599484  | 0.12788931  | 2.074065745  | 0.041019967 | -3.872325763 |
| ZNF347        | 0.208898963  | 1.309802617 | 2.073969813  | 0.041029097 | -3.872499609 |
| CFAP36        | -0.251013952 | 2.652959233 | -2.073770934 | 0.041048028 | -3.872859989 |
| FAM168B       | 0.251063481  | 4.747701237 | 2.073675962  | 0.041057071 | -3.873032073 |
| JMJD1C        | 0.267170163  | 2.376655079 | 2.073399335  | 0.041083421 | -3.873533263 |
| ACTA2         | -0.75240135  | 4.390479298 | -2.073324324 | 0.041090569 | -3.873669156 |
| NFATC2IP      | 0.202937151  | 3.071984864 | 2.073024147  | 0.041119183 | -3.87421293  |
| SLA           | -0.349035057 | 1.485195339 | -2.072186958 | 0.041199078 | -3.875729131 |
| RP11-315D16.4 | 0.22671035   | 0.161222811 | 2.071606675  | 0.041254534 | -3.876779736 |
| CYP11A1       | 0.378642338  | 0.613716849 | 2.071472403  | 0.041267375 | -3.877022799 |
| RP11-291H24.1 | 0.405812656  | 0.610145899 | 2.071352937  | 0.041278803 | -3.877239047 |
| FKSG48        | 0.492136088  | 1.041438808 | 2.071334852  | 0.041280534 | -3.877271783 |
| RP11-328L11.1 | 0.409264917  | 0.98830877  | 2.071195158  | 0.041293901 | -3.87752463  |
| TOR1AIP1      | 0.282315009  | 2.9343257   | 2.070926173  | 0.04131965  | -3.878011454 |
| TRAPPC8       | 0.254283324  | 2.246299619 | 2.070798672  | 0.04133186  | -3.878242191 |
| HNRNPCP1      | -0.257682329 | 1.569027367 | -2.070164185 | 0.041392668 | -3.879390229 |
| SNRPEP7       | 0.200890345  | 0.160560613 | 2.070148437  | 0.041394178 | -3.879418719 |
| RNF2          | 0.238024887  | 2.887040774 | 2.069473494  | 0.04145895  | -3.880639604 |
| HDGF          | 0.273091116  | 6.31976796  | 2.069432758  | 0.041462862 | -3.880713278 |
| RP11-5P18.10  | 0.241616909  | 0.421326366 | 2.069087592  | 0.041496023 | -3.881337489 |
| U2SURP        | 0.292465541  | 2.89312028  | 2.068997406  | 0.041504691 | -3.881500569 |
| MAFK          | 0.333558792  | 2.90959964  | 2.068886441  | 0.041515358 | -3.881701215 |
| NDUFS5        | -0.385862324 | 7.978552677 | -2.068715605 | 0.041531786 | -3.882010099 |

|               |              |             |              |             |              |
|---------------|--------------|-------------|--------------|-------------|--------------|
| MIR4491       | 0.379664109  | 0.130880296 | 2.068557862  | 0.041546959 | -3.882295291 |
| TNR           | 0.4745878    | 0.46228536  | 2.068407422  | 0.041561435 | -3.88256726  |
| PLK2          | -0.416791693 | 3.46995206  | -2.06822556  | 0.04157894  | -3.882896011 |
| MIR5699       | 0.226102076  | 0.259121886 | 2.068141781  | 0.041587006 | -3.88304745  |
| RNU7-147P     | 0.263796928  | 0.159368817 | 2.06786097   | 0.041614052 | -3.883555002 |
| RRM1-AS1      | 0.210222172  | 0.278666095 | 2.067765359  | 0.041623264 | -3.883727799 |
| RNU1-33P      | 0.332886691  | 0.201977466 | 2.0673346    | 0.041664789 | -3.884506223 |
| AL590762.6    | 0.273754634  | 0.805224694 | 2.066719992  | 0.041724099 | -3.885616626 |
| NFXL1         | 0.21536023   | 1.624827568 | 2.066489509  | 0.041746359 | -3.886032961 |
| RP11-568J23.1 | 0.270858911  | 1.061563309 | 2.066470704  | 0.041748176 | -3.886066927 |
| CCNT1         | 0.240760365  | 2.641328747 | 2.066386152  | 0.041756345 | -3.886219645 |
| RP4-697K14.3  | 0.222175462  | 0.127081217 | 2.066194158  | 0.0417749   | -3.886566407 |
| PHOSPHO1      | 1.024598476  | 5.228589497 | 2.06604823   | 0.041789008 | -3.88682995  |
| UFM1          | 0.245259319  | 3.684286254 | 2.06540064   | 0.041851663 | -3.887999278 |
| MFSD3         | -0.347732619 | 2.987369144 | -2.065250072 | 0.041866242 | -3.888271107 |
| RP11-545G3.2  | 0.210479604  | 0.258052609 | 2.065201902  | 0.041870907 | -3.888358066 |
| PRPF40A       | 0.259185553  | 3.355659601 | 2.064840023  | 0.041905969 | -3.889011299 |
| CERS6         | 0.351548499  | 2.247578474 | 2.064523422  | 0.041936664 | -3.889582714 |
| AC104301.2    | 0.276959687  | 0.158960549 | 2.064517711  | 0.041937218 | -3.88959302  |
| SH3PXD2A      | 0.324528169  | 4.342607916 | 2.064384526  | 0.041950136 | -3.889833374 |
| DAPK1-IT1     | 0.217175271  | 0.185300481 | 2.06432659   | 0.041955757 | -3.889937926 |
| DARS2         | 0.340139785  | 3.332050378 | 2.064287755  | 0.041959525 | -3.890008005 |
| RNU6-1188P    | 0.383212211  | 0.337998509 | 2.06415752   | 0.041972163 | -3.890243013 |
| RP11-413N13.1 | 0.258348474  | 0.107040031 | 2.063972628  | 0.041990111 | -3.890576624 |
| VIM           | -0.277390433 | 9.105173711 | -2.06324534  | 0.042060774 | -3.891888654 |
| RNU7-156P     | 0.225738549  | 0.099024196 | 2.062970086  | 0.042087544 | -3.892385104 |
| AC021052.1    | 0.460955014  | 0.253799089 | 2.062882937  | 0.042096023 | -3.892542273 |
| CACNA2D4      | -0.346283441 | 1.219166373 | -2.06283619  | 0.042100572 | -3.892626577 |
| LINC01549     | 0.769958319  | 2.30125148  | 2.062508255  | 0.042132493 | -3.893217933 |
| IRX5          | 0.491259018  | 3.021082659 | 2.062179287  | 0.042164536 | -3.893811065 |
| RPS5P2        | 0.226049242  | 0.309750549 | 2.06191405   | 0.042190387 | -3.894289227 |
| DSTNP1        | 0.250373477  | 1.124822327 | 2.061540177  | 0.042226849 | -3.894963142 |
| KDEL2         | 0.394649212  | 4.235388731 | 2.061058905  | 0.042273824 | -3.895830485 |

|               |              |             |              |             |              |
|---------------|--------------|-------------|--------------|-------------|--------------|
| MPHOSPH6      | -0.274787598 | 2.596574261 | -2.060564174 | 0.04232216  | -3.896721893 |
| DNM1L         | -0.220240788 | 3.393361624 | -2.060201084 | 0.042357665 | -3.897375989 |
| FOXP1         | -0.390294826 | 2.070986468 | -2.060159862 | 0.042361698 | -3.897450243 |
| SP2           | 0.20264518   | 3.495232458 | 2.059913855  | 0.04238577  | -3.89789335  |
| ADAM9         | 0.365360112  | 3.75908356  | 2.059909997  | 0.042386148 | -3.897900298 |
| CRYBA1        | 0.225973948  | 0.195771768 | 2.059822898  | 0.042394673 | -3.898057168 |
| B9D1          | -0.344179071 | 1.779021722 | -2.059663903 | 0.042410241 | -3.898343513 |
| VAT1          | -0.287328149 | 5.540498047 | -2.059548635 | 0.042421529 | -3.898551093 |
| AC107399.2    | 0.265144884  | 0.151308173 | 2.059251258  | 0.042450665 | -3.89908658  |
| RP11-145M9.6  | 0.345160781  | 0.88997799  | 2.058927039  | 0.042482451 | -3.89967032  |
| CTD-2267D19.3 | -0.251806497 | 1.036276077 | -2.05862142  | 0.042512432 | -3.900220498 |
| FLYWCH1       | 0.215843882  | 2.3069651   | 2.058407211  | 0.042533456 | -3.900606073 |
| SLC46A1       | 0.231947556  | 1.183894747 | 2.058331387  | 0.0425409   | -3.900742547 |
| ACTL6A        | 0.254196485  | 3.829215548 | 2.057960447  | 0.042577334 | -3.901410132 |
| KB-1507C5.3   | 0.27427623   | 0.336043701 | 2.057018341  | 0.042669989 | -3.903105164 |
| HIVEP2        | 0.265424256  | 1.931353639 | 2.056513218  | 0.042719738 | -3.904013691 |
| AC072062.1    | 0.268265814  | 0.893187932 | 2.056410466  | 0.042729865 | -3.90419848  |
| GLRX          | -0.327995971 | 2.237609559 | -2.05632826  | 0.042737967 | -3.904346312 |
| LINC01540     | -0.281510152 | 0.98826198  | -2.055950182 | 0.042775251 | -3.905026146 |
| BOLA3P4       | 0.234707478  | 0.096370312 | 2.055927917  | 0.042777447 | -3.905066177 |
| ARTN          | 0.321795528  | 0.807442165 | 2.055861963  | 0.042783954 | -3.90518476  |
| ECSCR         | -0.381602026 | 1.755866744 | -2.055787196 | 0.042791332 | -3.905319183 |
| TYMSOS        | 0.334487258  | 1.291035649 | 2.055522544  | 0.042817455 | -3.905794961 |
| RP11-12K11.1  | 0.20824325   | 0.289499296 | 2.054691732  | 0.042899551 | -3.907288198 |
| SERPINA1      | -0.527542533 | 1.978497778 | -2.054584708 | 0.042910137 | -3.907480514 |
| RPL36A        | -0.39697955  | 3.888132144 | -2.05390401  | 0.042977515 | -3.908703486 |
| PSD           | -0.370522055 | 1.303138305 | -2.053734929 | 0.042994265 | -3.909007207 |
| RGS9          | 0.213762663  | 0.455857118 | 2.053703146  | 0.042997414 | -3.909064297 |
| RN7SKP78      | 0.262411502  | 0.56754125  | 2.05350286   | 0.043017265 | -3.90942404  |
| USP39         | -0.208084191 | 4.002894301 | -2.053105826 | 0.043056638 | -3.910137074 |
| ZNF37BP       | 0.209570465  | 1.099223817 | 2.052828389  | 0.043084169 | -3.91063525  |
| LINC00393     | 0.283987385  | 0.281392853 | 2.051994596  | 0.043167001 | -3.912132078 |
| MRPL27        | -0.316608584 | 3.639811352 | -2.051969756 | 0.043169471 | -3.912176661 |

|                |              |              |              |             |              |
|----------------|--------------|--------------|--------------|-------------|--------------|
| HSD17B14       | -0.392257557 | 2.465867135  | -2.051530015 | 0.043213214 | -3.912965857 |
| RP11-243M5.2   | 0.223564886  | 0.427268094  | 2.050461245  | 0.043319688 | -3.914883323 |
| GJA1P1         | 0.375140056  | 1.569374278  | 2.050461035  | 0.043319709 | -3.914883701 |
| RP11-999E24.3  | -0.419869072 | 1.360718622  | -2.050434237 | 0.043322381 | -3.914931766 |
| RNU6-387P      | 0.433155077  | 1.234744855  | 2.050241712  | 0.043341586 | -3.915277073 |
| RIC8A          | -0.208335347 | 4.034788187  | -2.050237619 | 0.043341994 | -3.915284415 |
| SIRT6          | -0.305532948 | 2.917364308  | -2.050086027 | 0.043357121 | -3.915556286 |
| AC079776.2     | 0.503388731  | 0.916173057  | 2.049933511  | 0.043372345 | -3.915829794 |
| RP11-1079K10.2 | 0.287483308  | 0.519814886  | 2.049801246  | 0.043385551 | -3.916066972 |
| LA16c-361A3.3  | 0.234974994  | 0.917766318  | 2.049182983  | 0.043447327 | -3.917175458 |
| HMGCS1         | 0.360261747  | 3.166003768  | 2.049080755  | 0.043457549 | -3.917358714 |
| SEPT4-AS1      | 0.205142301  | 0.622227735  | 2.048657591  | 0.043499884 | -3.91811172  |
| SNORA2A        | 0.299255416  | 0.800746255  | 2.048224688  | 0.043543229 | -3.918892995 |
| MBD2           | 0.253322225  | 3.450270822  | 2.048064382  | 0.04355929  | -3.919180238 |
| C1QTNF7        | -0.437236736 | 0.761029447  | -2.047221938 | 0.043643774 | -3.920689435 |
| SNORA55        | 0.308316328  | 0.9111792296 | 2.047183583  | 0.043647624 | -3.920758132 |
| MIR1205        | 0.318263627  | 0.426753062  | 2.046809574  | 0.04368518  | -3.92142796  |
| RP11-677O4.5   | 0.244547314  | 0.112709637  | 2.046193788  | 0.043747073 | -3.922530557 |
| MAD1L1         | -0.285589489 | 3.063163999  | -2.04604806  | 0.043761732 | -3.922791446 |
| HLCS           | 0.249797935  | 2.299770035  | 2.045994812  | 0.043767089 | -3.922886769 |
| AL354764.1     | 0.22060893   | 0.108905655  | 2.045859598  | 0.043780695 | -3.923128815 |
| TIMM22         | -0.242800715 | 3.169163449  | -2.045762653 | 0.043790452 | -3.923302348 |
| AL133230.1     | 0.247365091  | 0.209893642  | 2.045586759  | 0.043808161 | -3.923617182 |
| SC5D           | 0.356172794  | 2.203986898  | 2.044674911  | 0.043900061 | -3.925248908 |
| PATL1          | 0.221760968  | 3.715393385  | 2.044550955  | 0.043912566 | -3.925470672 |
| USH1C          | 0.250776001  | 0.260679449  | 2.044411518  | 0.043926637 | -3.925720119 |
| LA16c-83F12.6  | 0.246347497  | 0.297951331  | 2.044391019  | 0.043928706 | -3.925756789 |
| ZNF830         | -0.230122773 | 2.607351226  | -2.044365282 | 0.043931304 | -3.92580283  |
| FAM105A        | -0.305696643 | 1.572195527  | -2.044198796 | 0.043948111 | -3.926100641 |
| PTGER1         | 0.32787568   | 0.602432817  | 2.043867169  | 0.043981607 | -3.926693791 |
| ZNF702P        | 0.230146915  | 0.758436333  | 2.043863539  | 0.043981973 | -3.926700284 |
| FAM86DP        | -0.241880206 | 1.667544023  | -2.043763207 | 0.043992112 | -3.926879721 |
| AC002075.4     | 0.44144319   | 1.747938334  | 2.043717081  | 0.043996773 | -3.926962212 |

|               |              |             |              |             |              |
|---------------|--------------|-------------|--------------|-------------|--------------|
| RP11-728F11.4 | 0.219409224  | 0.472768327 | 2.043589196  | 0.044009699 | -3.927190909 |
| NADK2         | 0.244571342  | 2.814283478 | 2.043235737  | 0.044045444 | -3.927822936 |
| RP1-228P16.7  | 0.223017281  | 0.761826162 | 2.042491849  | 0.044120752 | -3.929152775 |
| AC009305.2    | 0.203116713  | 0.143055973 | 2.04239408   | 0.044130658 | -3.929327522 |
| ETV5          | -0.333545604 | 2.438453311 | -2.041854168 | 0.044185396 | -3.9302924   |
| RPS15AP16     | 0.300159953  | 0.848384901 | 2.041697938  | 0.044201246 | -3.930571556 |
| ADAMTSL2      | 0.382803648  | 1.881141241 | 2.041347055  | 0.044236862 | -3.931198455 |
| CTC-444N24.8  | -0.215476162 | 2.282463679 | -2.041272587 | 0.044244424 | -3.93133149  |
| MIR520E       | 0.247394688  | 0.118904392 | 2.040987543  | 0.04427338  | -3.93184067  |
| RP11-598P20.3 | 0.457360569  | 3.317239243 | 2.040575896  | 0.044315224 | -3.932575889 |
| CTA-276O3.4   | 0.535909904  | 2.533195699 | 2.040484251  | 0.044324545 | -3.932739553 |
| RP11-66B24.5  | 0.209166602  | 0.15677231  | 2.040269684  | 0.044346374 | -3.933122711 |
| ZXDC          | 0.211552205  | 2.039525986 | 2.04021317   | 0.044352125 | -3.933223623 |
| TCF19         | 0.386407848  | 3.902401078 | 2.040119404  | 0.044361668 | -3.933391048 |
| MYO6          | 0.475775419  | 2.810460367 | 2.03999739   | 0.044374088 | -3.933608902 |
| RNA5SP100     | 0.211217225  | 0.065417252 | 2.039457434  | 0.04442909  | -3.934572839 |
| RNU6-358P     | 0.401745458  | 0.466597203 | 2.039336587  | 0.044441408 | -3.934788546 |
| RP11-589M2.1  | 0.212594094  | 0.209200247 | 2.039169444  | 0.04445845  | -3.935086869 |
| STX18         | -0.272103735 | 2.760663122 | -2.039055568 | 0.044470064 | -3.935290108 |
| DLX2          | 0.484608231  | 1.238926593 | 2.038663664  | 0.044510053 | -3.935989472 |
| RP11-242O24.3 | 0.231762365  | 0.28075639  | 2.038600118  | 0.04451654  | -3.93610286  |
| ZCCHC11       | 0.218216574  | 1.91509546  | 2.03824859   | 0.04455244  | -3.936730052 |
| UBE2V2P2      | 0.215582486  | 0.154166364 | 2.037833698  | 0.044594843 | -3.937470171 |
| GPR124        | 0.432579949  | 4.316617357 | 2.037193128  | 0.044660378 | -3.938612609 |
| RNU6-628P     | 0.355902182  | 0.296442522 | 2.037043942  | 0.044675653 | -3.938878631 |
| KIAA1161      | 0.444346406  | 2.700177821 | 2.036778578  | 0.044702834 | -3.939351774 |
| LRP2BP        | 0.235005754  | 0.485209841 | 2.036358136  | 0.044745929 | -3.940101307 |
| LYZ           | -0.643747181 | 3.823243207 | -2.036296612 | 0.044752238 | -3.940210975 |
| INPP4A        | 0.295130553  | 2.36031282  | 2.035910244  | 0.044791877 | -3.940899621 |
| NDUFS7        | -0.24949372  | 2.701708761 | -2.035756519 | 0.044807656 | -3.941173581 |
| RP11-113K21.1 | 0.212833776  | 0.164643358 | 2.035383265  | 0.044845989 | -3.941838698 |
| BAG4          | 0.280474266  | 2.557014884 | 2.035345103  | 0.04484991  | -3.941906693 |
| AL132709.3    | 0.318941766  | 0.116312839 | 2.034590198  | 0.044927531 | -3.943251528 |

|               |              |             |              |             |              |
|---------------|--------------|-------------|--------------|-------------|--------------|
| TAGAP         | -0.215431763 | 0.82021428  | -2.034430989 | 0.044943916 | -3.943535094 |
| SMO           | 0.324926593  | 4.310583883 | 2.034403001  | 0.044946797 | -3.943584943 |
| RNU6-106P     | 0.319977176  | 0.359489162 | 2.034369354  | 0.04495026  | -3.943644868 |
| BAIAP2-AS1    | -0.285187728 | 2.347870542 | -2.034288148 | 0.044958621 | -3.943789492 |
| P2RY11        | -0.271210161 | 1.981912476 | -2.033828158 | 0.045006002 | -3.944608618 |
| CYSTM1        | -0.351974256 | 3.253197011 | -2.033365269 | 0.045053726 | -3.945432735 |
| LINC00087     | -0.204326055 | 0.524963038 | -2.033279395 | 0.045062584 | -3.945585605 |
| CYCSP5        | 0.244550066  | 0.099762972 | 2.032788773  | 0.045113223 | -3.946458882 |
| ASXL1         | 0.22653741   | 3.15459958  | 2.032696181  | 0.045122785 | -3.946623668 |
| AL354749.1    | 0.229636972  | 0.074800743 | 2.032354811  | 0.045158054 | -3.947231149 |
| RP11-134L4.2  | 0.283604566  | 0.122442425 | 2.031806697  | 0.045214732 | -3.948206345 |
| RP1-120G22.11 | 0.435553656  | 1.022482355 | 2.031134445  | 0.045284331 | -3.949402081 |
| RP11-104N10.2 | 0.258949231  | 1.070823868 | 2.030744579  | 0.045324736 | -3.950095374 |
| PHTF2         | 0.270219313  | 2.746456573 | 2.030680244  | 0.045331406 | -3.950209769 |
| SNORD65       | 0.225370818  | 0.11009859  | 2.030139314  | 0.045387526 | -3.95117147  |
| RNY4P36       | 0.336135942  | 0.71333279  | 2.030032236  | 0.045398642 | -3.951361812 |
| MIR621        | 0.36311596   | 3.877645011 | 2.029783544  | 0.045424468 | -3.951803856 |
| HNRNPU        | 0.223880116  | 5.400091109 | 2.029747273  | 0.045428236 | -3.951868321 |
| CYP1B1        | 0.639429147  | 3.161064878 | 2.029518596  | 0.045451996 | -3.952274739 |
| AC104651.2    | 0.202580382  | 0.485128095 | 2.029482439  | 0.045455754 | -3.952338996 |
| RNU4-43P      | 0.224950081  | 0.09569829  | 2.02926631   | 0.045478222 | -3.952723066 |
| DEGS1         | 0.277432582  | 5.333091049 | 2.029150952  | 0.045490218 | -3.952928049 |
| RIN3          | -0.293584147 | 2.476780159 | -2.028690623 | 0.045538115 | -3.95374591  |
| CNNM4         | 0.271516298  | 2.290782625 | 2.028590004  | 0.04554859  | -3.953924658 |
| BAX           | -0.266482932 | 4.264990767 | -2.028518691 | 0.045556015 | -3.954051338 |
| LINC01137     | -0.312963784 | 1.882718893 | -2.028470516 | 0.045561032 | -3.954136914 |
| GRAMD2        | 0.247554287  | 0.505401049 | 2.028400484  | 0.045568326 | -3.954261313 |
| C11orf24      | 0.233054258  | 4.55133859  | 2.028389107  | 0.045569511 | -3.954281521 |
| RP11-568K15.1 | 0.241112308  | 1.139319603 | 2.028230104  | 0.045586075 | -3.954563944 |
| CHST13        | 0.680192369  | 2.455324008 | 2.028026877  | 0.045607253 | -3.954924888 |
| RP11-537P22.2 | 0.21615793   | 0.116089578 | 2.02775973   | 0.045635106 | -3.955399308 |
| IQGAP2        | -0.309846232 | 1.170457842 | -2.02768198  | 0.045643215 | -3.955537374 |
| HIST2H2AA4    | -0.396195302 | 1.271970838 | -2.027225828 | 0.045690814 | -3.956347286 |

|               |              |             |              |             |              |
|---------------|--------------|-------------|--------------|-------------|--------------|
| MIR518A2      | 0.232488346  | 0.085410179 | 2.026537253  | 0.045762746 | -3.957569563 |
| NEK4          | 0.200136961  | 1.715780783 | 2.026516543  | 0.045764911 | -3.957606317 |
| AL050321.1    | 0.233430169  | 0.255072525 | 2.02648117   | 0.045768609 | -3.957669097 |
| RNU1-17P      | 0.20837727   | 0.117105293 | 2.026429752  | 0.045773985 | -3.957760351 |
| NCEH1         | -0.21911122  | 1.396199876 | -2.025971499 | 0.045821921 | -3.958573542 |
| DHX36         | 0.223695115  | 2.588498546 | 2.025964226  | 0.045822682 | -3.958586446 |
| RNA5SP423     | 0.26170335   | 0.085710337 | 2.025960563  | 0.045823065 | -3.958592945 |
| TSTD2         | 0.236787305  | 1.471351882 | 2.025536373  | 0.045867477 | -3.959345537 |
| FBLN2         | 0.757999157  | 3.849504968 | 2.024770925  | 0.045947711 | -3.960703225 |
| CTNND2        | 0.328503478  | 0.647245811 | 2.024752137  | 0.045949682 | -3.960736543 |
| AC092657.2    | 0.209073946  | 0.130486305 | 2.024512041  | 0.045974874 | -3.961162306 |
| GUSBP6        | 0.208354046  | 0.160974191 | 2.024432181  | 0.045983256 | -3.961303913 |
| FAM192A       | -0.214585955 | 3.320418059 | -2.02429521  | 0.045997636 | -3.961546776 |
| ZNF736        | 0.218994787  | 1.148398748 | 2.024050936  | 0.046023289 | -3.961979859 |
| UBE2E2        | -0.337273088 | 2.688077016 | -2.023796022 | 0.046050074 | -3.962431755 |
| RPS6KA3       | 0.310974115  | 3.568083617 | 2.023602995  | 0.046070364 | -3.962773908 |
| TBC1D22A      | -0.222423182 | 2.450189291 | -2.023593842 | 0.046071327 | -3.962790132 |
| RP11-771F20.1 | 0.226119773  | 0.678674485 | 2.023038981  | 0.046129696 | -3.963773494 |
| GNAI1         | 0.475848937  | 3.610570912 | 2.02276707   | 0.046158324 | -3.964255302 |
| MIR7641-1     | 0.547950951  | 0.668538021 | 2.02253963   | 0.046182281 | -3.964658267 |
| MPV17L2       | -0.274710514 | 3.024439648 | -2.022385062 | 0.046198568 | -3.964932099 |
| MYCN          | -0.22189843  | 0.476563399 | -2.021855005 | 0.046254459 | -3.965870998 |
| CIC           | 0.340662409  | 3.949538489 | 2.021594404  | 0.046281958 | -3.966332525 |
| LMTK2         | 0.213206182  | 1.788617752 | 2.021556264  | 0.046285984 | -3.966400067 |
| AC092580.4    | -0.268906361 | 0.364794647 | -2.021516955 | 0.046290134 | -3.966469678 |
| RNU7-167P     | 0.228706628  | 0.097564229 | 2.021464539  | 0.046295668 | -3.966562497 |
| PLCB2         | -0.335643705 | 1.695629232 | -2.021027742 | 0.046341804 | -3.967335902 |
| AHDC1         | 0.349114815  | 3.44846073  | 2.020917926  | 0.046353409 | -3.967530323 |
| C17orf59      | -0.405414449 | 2.196617419 | -2.020737846 | 0.046372445 | -3.967849117 |
| AC005227.1    | 0.229272181  | 0.13672306  | 2.02051801   | 0.046395693 | -3.968238258 |
| NAGPA         | -0.217555292 | 1.635974737 | -2.020225408 | 0.046426651 | -3.968756145 |
| HOXB6         | 0.285899145  | 1.873024722 | 2.019940781  | 0.046456783 | -3.969259853 |
| RN7SL70P      | 0.251142799  | 0.131512178 | 2.0198732    | 0.04646394  | -3.969379442 |



|               |              |             |              |             |              |
|---------------|--------------|-------------|--------------|-------------|--------------|
| YPEL5         | -0.225008593 | 4.197278186 | -2.019677657 | 0.046484653 | -3.969725449 |
| RP11-767I20.1 | 0.227094796  | 0.234121972 | 2.019204004  | 0.046534858 | -3.970563436 |
| RP11-243J18.2 | 0.237448819  | 0.471852018 | 2.019078711  | 0.046548147 | -3.970785075 |
| RP3-428L16.2  | 0.50311302   | 2.060548262 | 2.018841392  | 0.046573325 | -3.971204851 |
| AP000266.7    | 0.236729881  | 0.310323155 | 2.018802256  | 0.046577479 | -3.97127407  |
| TOP2A         | 0.354329935  | 5.014307087 | 2.01871101   | 0.046587163 | -3.971435454 |
| CTD-2132N18.4 | -0.249929313 | 0.516701668 | -2.018575621 | 0.046601536 | -3.971674898 |
| RP11-820I16.2 | 0.285373627  | 0.160412011 | 2.018565261  | 0.046602636 | -3.97169322  |
| C9orf41       | 0.229489541  | 2.316803332 | 2.018105261  | 0.0466515   | -3.972506652 |
| JADE2         | -0.243250923 | 1.638116431 | -2.017761245 | 0.046688072 | -3.973114875 |
| RPL39P40      | 0.388868695  | 0.613237994 | 2.017529415  | 0.046712731 | -3.9735247   |
| RN7SL68P      | 0.232562601  | 0.530418004 | 2.017109586  | 0.046757416 | -3.974266758 |
| KIF5B         | 0.295613336  | 4.59761702  | 2.017053388  | 0.0467634   | -3.974366078 |
| ATOX1         | -0.290671378 | 2.967044664 | -2.017048622 | 0.046763907 | -3.974374503 |
| PRSS35        | 0.764733121  | 4.091017698 | 2.016850178  | 0.046785044 | -3.974725198 |
| DLG2          | 0.206267459  | 0.469138338 | 2.016772478  | 0.046793322 | -3.974862504 |
| SSR4P1        | 0.230127071  | 0.986072621 | 2.01668574   | 0.046802565 | -3.975015775 |
| FANCA         | 0.277580937  | 1.614393495 | 2.01625196   | 0.046848811 | -3.975782201 |
| IL12RB1       | -0.239686553 | 0.733441671 | -2.015919258 | 0.046884308 | -3.976369934 |
| RP11-180P8.5  | 0.212750704  | 0.36507405  | 2.01481984   | 0.047001771 | -3.978311487 |
| RNA5SP36      | 0.277045868  | 0.119869709 | 2.014465503  | 0.047039682 | -3.978937037 |
| CALM2         | -0.251351497 | 5.807206986 | -2.014407107 | 0.047045932 | -3.97904012  |
| AL450992.2    | 0.636556413  | 1.576262121 | 2.014396439  | 0.047047074 | -3.97905895  |
| CXCR2P1       | -0.337785872 | 0.638379551 | -2.014267712 | 0.047060855 | -3.979286174 |
| AC087738.1    | 0.243022458  | 0.11889674  | 2.013714931  | 0.047120074 | -3.980261773 |
| KIF21A        | 0.427682754  | 1.58933398  | 2.013000768  | 0.047196675 | -3.981521835 |
| RP11-419C5.3  | 0.312708151  | 0.223315443 | 2.012962478  | 0.047200785 | -3.981589383 |
| CARD10        | -0.215304919 | 1.035909605 | -2.012100608 | 0.047293378 | -3.983109496 |
| GLB1          | -0.273981072 | 4.245934165 | -2.011797257 | 0.047326005 | -3.983644386 |
| HMGB1P46      | 0.20574671   | 0.117175939 | 2.011709037  | 0.047335497 | -3.983799929 |
| CTPS1         | 0.328832259  | 3.676721083 | 2.01128779   | 0.047380843 | -3.984542552 |
| DPH3          | -0.240348708 | 2.698368338 | -2.011057926 | 0.047405604 | -3.984947726 |
| RP11-480D4.2  | 0.229259727  | 0.253479163 | 2.01102641   | 0.047408999 | -3.985003275 |

|               |              |             |              |             |              |
|---------------|--------------|-------------|--------------|-------------|--------------|
| RP11-269G24.4 | 0.202449148  | 0.492862819 | 2.011013125  | 0.047410431 | -3.98502669  |
| EIF4A1P12     | 0.204723153  | 0.216093259 | 2.010312922  | 0.047485929 | -3.986260627 |
| GABARAPL1     | -0.290190713 | 3.368316588 | -2.010180835 | 0.047500183 | -3.986493356 |
| RNU6-1102P    | 0.252717428  | 0.131833531 | 2.010173815  | 0.047500941 | -3.986505725 |
| TMTC3         | 0.214410366  | 2.340076025 | 2.010121538  | 0.047506583 | -3.986597828 |
| AL109653.1    | 0.201625494  | 0.07554788  | 2.009862881  | 0.047534509 | -3.987053512 |
| RP11-894P9.1  | 0.371672156  | 2.006220819 | 2.009727144  | 0.047549169 | -3.987292621 |
| MIR4753       | 0.38402195   | 0.405759795 | 2.009410701  | 0.047583362 | -3.987850002 |
| C1orf216      | -0.21248159  | 3.279883407 | -2.009406522 | 0.047583814 | -3.987857363 |
| NEURL1B       | 0.373012202  | 2.768982046 | 2.009270317  | 0.047598537 | -3.988097248 |
| CPLX1         | -0.313003903 | 1.01288466  | -2.009056027 | 0.04762171  | -3.988474628 |
| SAV1          | 0.281628007  | 2.860886374 | 2.00892698   | 0.04763567  | -3.988701871 |
| MIR4327       | 0.228169785  | 0.126796841 | 2.008899351  | 0.047638659 | -3.988750522 |
| MIR5690       | 0.350330908  | 0.396601856 | 2.008327942  | 0.047700516 | -3.989756565 |
| TBC1D4        | 0.285880704  | 3.039168376 | 2.008113927  | 0.047723702 | -3.990133301 |
| LMO7-AS1      | 0.503193627  | 1.302435095 | 2.008078495  | 0.047727542 | -3.990195669 |
| RNU4-35P      | 0.371319327  | 0.687140629 | 2.007187616  | 0.047824166 | -3.991763489 |
| GSTM2         | -0.267325182 | 1.41571676  | -2.006760221 | 0.047870581 | -3.992515422 |
| SGOL2         | 0.301572057  | 2.081495794 | 2.006593344  | 0.047888714 | -3.992808975 |
| RAB8A         | -0.226655948 | 3.101475957 | -2.00646335  | 0.047902844 | -3.993037633 |
| BX255923.2    | 0.264891479  | 0.439551184 | 2.006350859  | 0.047915074 | -3.993235491 |
| RBPJL         | 0.202717437  | 0.204346817 | 2.00627654   | 0.047923155 | -3.993366206 |
| RPL21P136     | 0.269276869  | 0.415300595 | 2.006234129  | 0.047927767 | -3.993440796 |
| RIMKLBP2      | 0.202605092  | 0.596771851 | 2.006032132  | 0.04794974  | -3.993796042 |
| RP11-114N19.3 | 0.209370444  | 0.47589989  | 2.005846974  | 0.047969888 | -3.994121646 |
| RNU6-1262P    | 0.251523442  | 0.524821465 | 2.005772198  | 0.047978027 | -3.994253133 |
| ALG8          | 0.259072515  | 3.632541064 | 2.005411992  | 0.04801725  | -3.994886462 |
| RP11-30L3.2   | 0.251723253  | 0.453326654 | 2.005366545  | 0.048022201 | -3.994966363 |
| RNU6-1318P    | 0.216439768  | 0.180714682 | 2.005332942  | 0.048025861 | -3.995025438 |
| RP11-5P18.11  | 0.202528466  | 0.064503002 | 2.005306785  | 0.048028711 | -3.995071422 |
| ASH2L         | 0.27804597   | 3.214728668 | 2.004757737  | 0.048088562 | -3.996036539 |
| AP000462.3    | 0.342462023  | 1.052864093 | 2.004727311  | 0.048091881 | -3.996090013 |
| MTBP          | 0.250357439  | 1.173725333 | 2.004436258  | 0.048123636 | -3.996601523 |

|               |              |             |              |             |              |
|---------------|--------------|-------------|--------------|-------------|--------------|
| RP3-473L9.4   | -0.316371508 | 0.788403511 | -2.004028023 | 0.048168206 | -3.997318859 |
| AC008069.2    | 0.21121557   | 0.12512231  | 2.003416084  | 0.048235082 | -3.99839389  |
| PLXNA4        | 0.21833977   | 0.377709196 | 2.00337859   | 0.048239182 | -3.998459747 |
| SCML1         | 0.316910051  | 1.797895012 | 2.003212274  | 0.048257374 | -3.998751869 |
| AMOTL1        | 0.405336162  | 2.848944888 | 2.002972676  | 0.04828359  | -3.999172666 |
| MRGPRF        | 0.697228274  | 1.528078518 | 2.002950636  | 0.048286002 | -3.999211372 |
| MAP4K5        | 0.256860675  | 2.849780022 | 2.002620964  | 0.048322096 | -3.999790281 |
| GUCY1A2       | 0.375014629  | 1.103364568 | 2.002371508  | 0.048349423 | -4.000228274 |
| AL596220.1    | 0.257022091  | 0.195113241 | 2.001976802  | 0.048392689 | -4.000921194 |
| TMEM60        | -0.260817053 | 3.825433439 | -2.001645615 | 0.048429017 | -4.001502508 |
| RNU6-888P     | 0.366514745  | 0.122291862 | 2.001097727  | 0.048489166 | -4.002463995 |
| COL13A1       | 0.571676617  | 2.71266299  | 2.000810544  | 0.04852072  | -4.002967878 |
| RPS29P2       | 0.201615294  | 0.10974307  | 2.000597389  | 0.048544151 | -4.00334183  |
| MED18         | -0.243150113 | 3.215494354 | -1.999976156 | 0.048612497 | -4.004431496 |
| WAC           | 0.211984162  | 3.395482408 | 1.999888229  | 0.048622176 | -4.004585699 |
| AC003988.1    | 0.203226474  | 0.328518    | 1.99986272   | 0.048624985 | -4.004630433 |
| RNA5SP399     | 0.246676244  | 0.205546681 | 1.999289325  | 0.048688154 | -4.005635867 |
| AL161908.1    | 0.243799411  | 0.140047015 | 1.999179372  | 0.048700275 | -4.005828638 |
| BORA          | 0.233149618  | 1.4553897   | 1.999014369  | 0.04871847  | -4.006117903 |
| STRN          | 0.216416686  | 2.538560315 | 1.998731936  | 0.048749627 | -4.006612984 |
| RPL13P6       | 0.241273255  | 0.529319272 | 1.998703419  | 0.048752774 | -4.006662969 |
| ING1          | 0.297723087  | 1.863241578 | 1.998006951  | 0.048829682 | -4.007883533 |
| TPM3P8        | 0.238534743  | 0.863793352 | 1.997794409  | 0.048853173 | -4.008255938 |
| RP11-647K16.1 | -0.224295475 | 0.705730829 | -1.997654847 | 0.048868604 | -4.008500452 |
| snoU13        | 0.338316649  | 0.627252804 | 1.997648885  | 0.048869263 | -4.008510895 |
| ITK           | 0.449600611  | 0.863240009 | 1.997629064  | 0.048871455 | -4.008545621 |
| RP11-49O14.2  | 0.241359955  | 0.862355095 | 1.997391452  | 0.048897736 | -4.008961878 |
| RP11-25B7.1   | 0.25147701   | 0.410797616 | 1.997383544  | 0.048898611 | -4.008975732 |
| EIF3D         | -0.260675667 | 5.268920872 | -1.996905179 | 0.048951559 | -4.009813609 |
| CTD-2555K7.2  | 0.235110036  | 0.438435331 | 1.996499076  | 0.048996547 | -4.010524774 |
| CYP51A1       | 0.267156701  | 1.135683486 | 1.996253284  | 0.049023793 | -4.01095514  |
| AC010311.1    | 0.22980015   | 0.297220989 | 1.996138636  | 0.049036506 | -4.011155866 |
| RNA5SP413     | 0.366167653  | 0.129536316 | 1.99597963   | 0.049054143 | -4.011434236 |

|               |              |             |              |             |              |
|---------------|--------------|-------------|--------------|-------------|--------------|
| DHX58         | -0.300462147 | 1.572296628 | -1.995912537 | 0.049061586 | -4.011551689 |
| RN7SL49P      | 0.224166869  | 0.489076114 | 1.995510411  | 0.049106219 | -4.012255572 |
| TXNDC12       | -0.201572587 | 4.485400838 | -1.995424146 | 0.049115799 | -4.012406555 |
| LSM14B        | 0.246064411  | 3.959996906 | 1.99541267   | 0.049117073 | -4.012426641 |
| PLSCR4        | 0.390251095  | 1.726934395 | 1.994923331  | 0.049171443 | -4.013282974 |
| DDIAS         | 0.220145892  | 1.436838319 | 1.994880406  | 0.049176215 | -4.013358082 |
| RPL7P52       | 0.217959352  | 0.380199678 | 1.994757837  | 0.049189842 | -4.013572541 |
| KHSRP         | 0.273528588  | 5.65675339  | 1.994727591  | 0.049193206 | -4.013625461 |
| LPP           | 0.252987877  | 2.5432609   | 1.994702652  | 0.049195979 | -4.013669093 |
| IFI27L1       | -0.280418968 | 2.225315762 | -1.99442415  | 0.049226959 | -4.014156333 |
| ALDH7A1       | -0.273642313 | 2.819953234 | -1.99442017  | 0.049227402 | -4.014163295 |
| KLF13         | 0.300226116  | 3.898134352 | 1.994216344  | 0.049250086 | -4.014519849 |
| CYFIP2        | 0.670458935  | 2.031838197 | 1.994067495  | 0.049266657 | -4.01478021  |
| CLSPN         | 0.335039179  | 2.504669548 | 1.993854678  | 0.049290358 | -4.01515243  |
| TUFT1         | 0.339332967  | 1.547752649 | 1.9938422    | 0.049291748 | -4.015174253 |
| AP2S1         | -0.300319687 | 5.835273196 | -1.993822531 | 0.049293939 | -4.015208654 |
| RP11-340I6.11 | 0.290563078  | 0.125526319 | 1.993822171  | 0.049293979 | -4.015209284 |
| RNF38         | 0.246156921  | 2.640860964 | 1.993708664  | 0.049306625 | -4.015407791 |
| CXADR         | 0.515136323  | 1.672484295 | 1.993472646  | 0.049332929 | -4.015820523 |
| PRAC1         | 0.306842129  | 0.202843721 | 1.993307559  | 0.049351334 | -4.016109188 |
| UTP3          | -0.228927346 | 3.917367389 | -1.993198663 | 0.049363478 | -4.016299587 |
| RNU6-1004P    | 0.390698279  | 0.688843518 | 1.993170962  | 0.049366568 | -4.016348022 |
| OACYLP        | 0.297985263  | 0.603081479 | 1.993024362  | 0.049382922 | -4.016604326 |
| ARC           | 0.30934083   | 0.770927018 | 1.992775786  | 0.049410662 | -4.017038882 |
| RP11-433M22.1 | 0.270849369  | 0.134176573 | 1.992504927  | 0.049440904 | -4.017512336 |
| REV3L-IT1     | 0.267035925  | 0.492985109 | 1.992396622  | 0.049453    | -4.017701634 |
| PLD3          | -0.327254611 | 6.06683129  | -1.992375802 | 0.049455326 | -4.017738022 |
| HSPE1P7       | 0.272812934  | 0.434409593 | 1.991516656  | 0.04955138  | -4.019239312 |
| YME1L1        | 0.234874757  | 4.181632671 | 1.991459479  | 0.049557778 | -4.019339203 |
| UFL1          | 0.248784111  | 2.727715627 | 1.991078577  | 0.049600419 | -4.020004595 |
| ANKRD36B      | 0.200060133  | 0.397912423 | 1.990691844  | 0.049643744 | -4.020680054 |
| FAM90A1       | 0.200058747  | 0.493453941 | 1.990637285  | 0.049649859 | -4.020775336 |
| HERPUD1       | -0.26448486  | 4.110955716 | -1.990248525 | 0.049693449 | -4.0214542   |

|              |              |             |              |             |              |
|--------------|--------------|-------------|--------------|-------------|--------------|
| YY1AP1       | 0.250279403  | 3.548962887 | 1.990217096  | 0.049696975 | -4.021509076 |
| RPS23P5      | 0.2636241    | 0.426960122 | 1.99000347   | 0.049720943 | -4.021882059 |
| RPL26L1      | -0.339377443 | 3.933221437 | -1.989975729 | 0.049724056 | -4.021930491 |
| TP53         | 1.121347768  | 3.883007178 | 1.989799087  | 0.049743883 | -4.022238871 |
| SUCO         | 0.307128281  | 2.870546899 | 1.989736402  | 0.049750921 | -4.0223483   |
| RP11-94B19.1 | 0.213929046  | 0.077248649 | 1.989511631  | 0.049776163 | -4.022740654 |
| RPL5P12      | -0.276836016 | 1.118135507 | -1.989286162 | 0.049801495 | -4.023134188 |
| IDUA         | -0.320840594 | 2.011789288 | -1.988998983 | 0.049833776 | -4.023635371 |
| RP11-153M3.1 | 0.249481979  | 1.015109423 | 1.98897651   | 0.049836303 | -4.023674588 |
| WDR82        | -0.210556182 | 4.430040596 | -1.98873757  | 0.049863176 | -4.024091531 |
| LETM2        | 0.226917558  | 1.031758974 | 1.988676931  | 0.049869998 | -4.024197336 |
| SARAF        | -0.252119693 | 5.523443849 | -1.988206036 | 0.049923001 | -4.025018878 |
| GOLIM4       | 0.284410544  | 4.673866677 | 1.988120771  | 0.049932603 | -4.025167617 |
| MANEA        | 0.213138477  | 1.650217422 | 1.987827728  | 0.049965617 | -4.025678761 |
| TAF4B        | 0.266233503  | 1.468510983 | 1.987613109  | 0.049989808 | -4.026053071 |

---

**Table S2. Potential prognostic genes identified in the training cohort (p-value < 0.05).**

| <b>ID</b> | <b>KM_pvalue</b> | <b>HR</b>   | <b>HR_95L</b> | <b>HR_95H</b> | <b>Cox_pvalue</b> |
|-----------|------------------|-------------|---------------|---------------|-------------------|
| ANXA5     | 0.03557234       | 0.420397926 | 0.196286843   | 0.900388498   | 0.025748239       |
| ATP6V1E1  | 0.049105093      | 0.573283685 | 0.338769103   | 0.970142144   | 0.038181513       |
| BTA1F1    | 0.018128901      | 2.161298445 | 1.160348572   | 4.025696316   | 0.015157217       |
| DLEU2     | 0.003123082      | 2.236812115 | 1.231254809   | 4.063601133   | 0.00821937        |
| HMGCL     | 0.02887385       | 0.410662316 | 0.182639787   | 0.92336692    | 0.031332581       |
| IFNGR1    | 0.032615795      | 0.379721423 | 0.164515537   | 0.8764422     | 0.023268251       |
| LHPP      | 0.024523477      | 0.414822177 | 0.197755603   | 0.870152027   | 0.019915081       |
| NPC2      | 0.002741643      | 0.611409875 | 0.418744999   | 0.89272       | 0.010846857       |
| PLCB4     | 0.010465829      | 1.899903349 | 1.224044305   | 2.94893961    | 0.004220247       |
| PLD3      | 0.001897011      | 0.40600305  | 0.219443529   | 0.75116581    | 0.004086015       |
| SELPLG    | 0.011190205      | 0.635989475 | 0.45094155    | 0.896973482   | 0.009887602       |
| SLC7A1    | 0.009278499      | 2.116380897 | 1.225514858   | 3.65484602    | 0.007155879       |
| SMAD9     | 0.042806027      | 1.624726378 | 1.116978468   | 2.363282622   | 0.011129406       |
| UHRF2     | 0.005393576      | 2.731663526 | 1.576974661   | 4.731836092   | 0.000337123       |
| ZFP90     | 0.048226782      | 0.203007104 | 0.076698513   | 0.537323121   | 0.001323988       |

**Table S3. Correlations that determined between the nine-gene signature and the 22 TICs by the Spearman coefficient.**

| TIC                          | r            | p-value     |
|------------------------------|--------------|-------------|
| B cells naive                | -0.031988755 | 0.771334762 |
| B cells memory               | -0.111564132 | 0.309382468 |
| Plasma cells                 | -0.089067199 | 0.417587696 |
| T cells CD8                  | -0.374387032 | 0.000415769 |
| T cells CD4 naive            | 0.416125486  | 7.47E-05    |
| T cells CD4 memory resting   | 0.198608186  | 0.068430188 |
| T cells CD4 memory activated | -0.300497265 | 0.005200901 |
| T cells follicular helper    | -0.212147088 | 0.051272949 |
| T cells regulatory (Tregs)   | -0.239137344 | 0.027511702 |
| T cells gamma delta          | 0.057539749  | 0.600926011 |
| NK cells resting             | 0.15627282   | 0.153227701 |
| NK cells activated           | 0.041344767  | 0.707142363 |
| Monocytes                    | -0.251936732 | 0.020018308 |
| Macrophages M0               | 0.262106703  | 0.015608989 |
| Macrophages M1               | -0.072761503 | 0.508116473 |
| Macrophages M2               | -0.266972836 | 0.013735627 |
| Dendritic cells resting      | 0.030832464  | 0.779386213 |
| Dendritic cells activated    | 0.14979394   | 0.171212615 |
| Mast cells resting           | -0.042790681 | 0.697388957 |
| Mast cells activated         | 0.341342571  | 0.001388518 |
| Eosinophils                  | 0.007665937  | 0.944487369 |
| Neutrophils                  | -0.046040092 | 0.675650429 |

**Table S4. The prognostic ability of 22 TICs tested by the Kaplan-Meier estimator.**

| TIC                          | P-value     |
|------------------------------|-------------|
| B cells naive                | 0.348294868 |
| B cells memory               | 0.814319965 |
| Plasma cells                 | 0.581366016 |
| T cells CD8                  | 0.021726632 |
| T cells CD4 naive            | 0.008624662 |
| T cells CD4 memory resting   | 0.36425876  |
| T cells CD4 memory activated | 0.10030296  |
| T cells follicular helper    | 0.254635984 |
| T cells regulatory (Tregs)   | 0.674650397 |
| T cells gamma delta          | 0.184566798 |
| NK cells resting             | 0.518362195 |
| NK cells activated           | 0.890663643 |
| Monocytes                    | 0.329225779 |
| Macrophages M0               | 0.885003231 |
| Macrophages M1               | 0.534206839 |
| Macrophages M2               | 0.802931997 |
| Dendritic cells resting      | 0.093454413 |
| Dendritic cells activated    | 0.635381386 |
| Mast cells resting           | 0.641581025 |
| Mast cells activated         | 0.000124234 |
| Eosinophils                  | 0.555229953 |
| Neutrophils                  | 0.470803973 |
| Risk score                   | 1.916e-07   |
